# Supplementary material for: Temperature Field Data Reconstruction Using the Sparse Low-Rank Matrix Completion Method
Source: Hindawi journal article supplement (doi:10.1155/2019/3676182), 2019-11-03
Supplement: f1 [file 3676182.f1.zip]

Archive with 101 entries (98 files):
- data/
- data/ERA Interim/
- data/ERA Interim/t2m-2014010100.txt
- data/ERA Interim/t2m-2014010106.txt
- data/ERA Interim/t2m-2014010112.txt
- data/ERA Interim/t2m-2014010118.txt
- data/ERA Interim/Tabel LRC-MC.xlsx
- data/ERA Interim/Tabel MC.xlsx
- data/ERA Interim/Tabel original.xlsx
- data/Jiangxi Meteorologic Bureau/
- data/Jiangxi Meteorologic Bureau/20170101.txt
- data/Jiangxi Meteorologic Bureau/20170102.txt
- data/Jiangxi Meteorologic Bureau/20170103.txt
- data/Jiangxi Meteorologic Bureau/20170104.txt
- data/Jiangxi Meteorologic Bureau/20170105.txt
- data/Jiangxi Meteorologic Bureau/20170106.txt
- data/Jiangxi Meteorologic Bureau/20170107.txt
- data/Jiangxi Meteorologic Bureau/20170108.txt
- data/Jiangxi Meteorologic Bureau/20170109.txt
- data/Jiangxi Meteorologic Bureau/20170110.txt
- data/Jiangxi Meteorologic Bureau/20170111.txt
- data/Jiangxi Meteorologic Bureau/20170112.txt
- data/Jiangxi Meteorologic Bureau/20170113.txt
- data/Jiangxi Meteorologic Bureau/20170114.txt
- data/Jiangxi Meteorologic Bureau/20170115.txt
- data/Jiangxi Meteorologic Bureau/20170116.txt
- data/Jiangxi Meteorologic Bureau/20170117.txt
- data/Jiangxi Meteorologic Bureau/20170118.txt
- data/Jiangxi Meteorologic Bureau/20170119.txt
- data/Jiangxi Meteorologic Bureau/20170120.txt
- data/Jiangxi Meteorologic Bureau/20170121.txt
- data/Jiangxi Meteorologic Bureau/20170122.txt
- data/Jiangxi Meteorologic Bureau/20170123.txt
- data/Jiangxi Meteorologic Bureau/20170124.txt
- data/Jiangxi Meteorologic Bureau/20170125.txt
- data/Jiangxi Meteorologic Bureau/20170126.txt
- data/Jiangxi Meteorologic Bureau/20170127.txt
- data/Jiangxi Meteorologic Bureau/20170128.txt
- data/Jiangxi Meteorologic Bureau/20170129.txt
- data/Jiangxi Meteorologic Bureau/20170130.txt
- data/Jiangxi Meteorologic Bureau/20170131.txt
- data/Jiangxi Meteorologic Bureau/20170201.txt
- data/Jiangxi Meteorologic Bureau/20170202.txt
- data/Jiangxi Meteorologic Bureau/20170203.txt
- data/Jiangxi Meteorologic Bureau/20170204.txt
- data/Jiangxi Meteorologic Bureau/20170205.txt
- data/Jiangxi Meteorologic Bureau/20170206.txt
- data/Jiangxi Meteorologic Bureau/20170207.txt
- data/Jiangxi Meteorologic Bureau/20170208.txt
- data/Jiangxi Meteorologic Bureau/20170209.txt
- data/Jiangxi Meteorologic Bureau/20170210.txt
- data/Jiangxi Meteorologic Bureau/20170211.txt
- data/Jiangxi Meteorologic Bureau/20170212.txt
- data/Jiangxi Meteorologic Bureau/20170213.txt
- data/Jiangxi Meteorologic Bureau/20170214.txt
- data/Jiangxi Meteorologic Bureau/20170215.txt
- data/Jiangxi Meteorologic Bureau/20170216.txt
- data/Jiangxi Meteorologic Bureau/20170217.txt
- data/Jiangxi Meteorologic Bureau/20170218.txt
- data/Jiangxi Meteorologic Bureau/20170219.txt
- data/Jiangxi Meteorologic Bureau/20170220.txt
- data/Jiangxi Meteorologic Bureau/20170221.txt
- data/Jiangxi Meteorologic Bureau/20170222.txt
- data/Jiangxi Meteorologic Bureau/20170223.txt
- data/Jiangxi Meteorologic Bureau/20170224.txt
- data/Jiangxi Meteorologic Bureau/20170225.txt
- data/Jiangxi Meteorologic Bureau/20170226.txt
- data/Jiangxi Meteorologic Bureau/20170227.txt
- data/Jiangxi Meteorologic Bureau/20170228.txt
- data/Jiangxi Meteorologic Bureau/20170301.txt
- data/Jiangxi Meteorologic Bureau/20170302.txt
- data/Jiangxi Meteorologic Bureau/20170303.txt
- data/Jiangxi Meteorologic Bureau/20170304.txt
- data/Jiangxi Meteorologic Bureau/20170305.txt
- data/Jiangxi Meteorologic Bureau/20170306.txt
- data/Jiangxi Meteorologic Bureau/20170307.txt
- data/Jiangxi Meteorologic Bureau/20170308.txt
- data/Jiangxi Meteorologic Bureau/20170309.txt
- data/Jiangxi Meteorologic Bureau/20170310.txt
- data/Jiangxi Meteorologic Bureau/20170311.txt
- data/Jiangxi Meteorologic Bureau/20170312.txt
- data/Jiangxi Meteorologic Bureau/20170313.txt
- data/Jiangxi Meteorologic Bureau/20170314.txt
- data/Jiangxi Meteorologic Bureau/20170315.txt
- data/Jiangxi Meteorologic Bureau/20170316.txt
- data/Jiangxi Meteorologic Bureau/20170317.txt
- data/Jiangxi Meteorologic Bureau/20170318.txt
- data/Jiangxi Meteorologic Bureau/20170319.txt
- data/Jiangxi Meteorologic Bureau/20170320.txt
- data/Jiangxi Meteorologic Bureau/20170321.txt
- data/Jiangxi Meteorologic Bureau/20170322.txt
- data/Jiangxi Meteorologic Bureau/20170323.txt
- data/Jiangxi Meteorologic Bureau/20170324.txt
- data/Jiangxi Meteorologic Bureau/20170325.txt
- data/Jiangxi Meteorologic Bureau/20170326.txt
- data/Jiangxi Meteorologic Bureau/20170327.txt
- data/Jiangxi Meteorologic Bureau/20170328.txt
- data/Jiangxi Meteorologic Bureau/20170329.txt
- data/Jiangxi Meteorologic Bureau/20170330.txt
- data/Jiangxi Meteorologic Bureau/20170331.txt
- data/Jiangxi Meteorologic Bureau/江西国家站.xlsx
