# Supplementary material for: Temperature Field Data Reconstruction Using the Sparse Low-Rank Matrix Completion Method
Source: Hindawi journal article supplement (doi:10.1155/2019/3676182), 2019-11-03
Supplement: f1 [file 3676182.f1.zip › data/ERA Interim/t2m-2014010106.txt]

257.5	257.4	257.2	257.1	256.8	256.6	256.4	256.1	255.9	255.7	255.5	255.3	255.3	255.5	255.7	255.9	256.0	256.0	255.9	255.9	255.8	255.6	255.3	255.0	254.7	254.3	253.8	253.3	252.7	252.1	251.4	250.6	249.8	249.0	248.3	247.8	247.4	247.1	246.8	246.7	246.6	246.5	246.4	246.3	246.1	245.9	245.7	245.6	245.8	246.0
258.2	257.7	257.2	256.7	256.9	257.2	257.4	257.7	257.6	257.5	257.4	257.4	257.7	258.0	258.3	258.7	258.6	258.5	258.4	258.3	258.3	258.2	258.2	258.1	257.8	257.4	257.0	256.6	256.0	255.3	254.6	253.9	253.1	252.4	251.6	250.9	250.8	250.7	250.6	250.5	250.3	250.1	249.9	249.7	249.8	250.0	250.1	250.2	250.9	251.5
260.7	260.4	260.0	259.3	260.3	261.3	262.3	263.3	263.2	263.1	263.0	262.9	262.9	262.9	262.9	263.0	262.6	262.3	261.9	261.6	262.0	262.4	262.7	263.1	262.9	262.8	262.5	262.3	261.9	261.5	261.0	260.6	260.1	259.6	259.1	258.6	258.2	257.8	257.5	257.1	256.5	255.9	255.3	254.7	255.5	256.5	257.4	258.3	258.7	259.2
266.8	266.5	266.4	266.2	266.1	266.0	265.9	265.8	265.7	265.6	265.5	265.4	265.4	265.3	265.2	265.2	265.1	265.0	264.9	264.8	264.7	264.6	264.4	264.3	264.2	264.0	263.8	263.6	263.3	263.1	262.8	262.5	262.3	262.1	261.9	261.7	261.5	261.4	261.3	261.3	261.3	261.3	261.3	261.3	261.3	261.5	261.6	261.6	261.7	261.9
268.1	268.0	267.9	267.8	267.7	267.7	267.7	267.7	267.6	267.5	267.5	267.3	267.2	267.0	266.8	266.7	266.6	266.5	266.4	266.2	266.0	265.8	265.6	265.5	265.3	265.1	264.9	264.7	264.5	264.3	264.1	263.9	263.9	263.8	263.7	263.6	263.5	263.4	263.3	263.3	263.4	263.4	263.3	263.3	263.1	262.7	262.2	261.7	261.6	261.5
269.2	269.1	269.1	269.0	268.9	268.9	268.9	268.9	268.8	268.7	268.6	268.4	268.2	268.0	267.8	267.6	267.5	267.4	267.2	266.9	266.7	266.6	266.5	266.3	266.2	266.0	265.9	265.7	265.6	265.5	265.5	265.4	265.3	265.3	265.2	265.1	265.0	264.9	264.8	264.6	264.5	264.0	263.4	262.7	262.2	261.7	258.2	257.7	255.8	254.4
270.2	270.2	270.1	270.0	269.9	269.7	269.6	269.5	269.3	269.2	269.0	268.8	268.6	268.4	268.3	268.1	267.9	267.6	267.4	267.3	267.1	267.1	267.0	267.0	266.9	266.8	266.7	266.6	266.5	266.5	266.6	266.6	266.4	266.2	266.1	266.0	266.0	266.0	265.5	264.6	263.8	262.9	262.2	256.6	255.8	254.9	254.1	253.5	251.4	250.5
271.5	271.3	271.1	270.9	270.6	270.4	270.1	269.8	269.6	269.4	269.2	269.0	268.8	268.7	268.5	268.4	268.2	268.0	267.8	267.7	267.6	267.6	267.5	267.5	267.4	267.3	267.1	267.0	267.0	266.9	266.9	266.9	266.7	266.5	266.3	266.2	266.0	264.9	263.6	262.1	261.5	255.3	254.4	254.3	253.9	250.3	249.7	249.1	248.6	248.4
272.4	272.2	272.0	271.7	271.4	271.0	270.6	270.3	270.1	269.8	269.6	269.4	269.2	269.1	268.9	268.8	268.6	268.5	268.3	268.2	268.1	267.9	267.8	267.7	267.6	267.5	267.3	267.2	267.0	266.9	266.7	266.7	266.7	266.7	265.8	265.0	264.2	263.1	261.4	257.8	251.0	249.3	247.7	247.7	247.5	247.5	247.2	247.0	246.7	246.3
273.2	272.9	272.7	272.4	272.0	271.7	271.4	271.1	271.0	270.8	270.6	270.5	270.4	270.2	270.1	270.0	269.8	269.5	269.3	269.1	269.0	268.8	268.6	268.4	268.0	267.6	267.3	267.2	267.0	266.9	266.8	266.8	266.4	266.0	264.9	262.8	260.8	259.4	251.8	250.8	250.2	248.9	247.2	246.9	246.6	246.1	245.5	244.9	244.8	244.7
273.5	273.4	273.3	273.1	273.0	272.8	272.5	272.3	272.1	271.8	271.6	271.5	271.3	271.1	271.0	270.8	270.5	270.2	269.9	269.8	269.6	269.4	269.1	268.8	268.3	267.8	267.5	267.5	267.5	267.2	266.8	266.4	265.1	263.8	262.7	261.2	252.8	250.8	248.4	246.2	246.2	246.2	246.1	246.2	246.2	245.9	245.4	244.8	245.0	245.1
272.3	272.2	272.1	272.0	272.0	272.0	271.9	271.9	272.0	272.0	272.0	271.8	271.6	271.4	271.1	270.9	270.7	270.5	270.3	270.0	269.8	269.5	269.3	269.0	268.7	268.4	268.0	267.7	267.5	266.9	266.2	265.5	264.5	263.6	262.2	260.0	257.7	256.2	245.8	244.4	243.2	241.9	241.3	245.3	245.9	246.2	246.3	246.5	246.3	246.2
268.1	267.8	267.5	267.2	266.8	266.7	266.9	267.1	270.3	271.3	271.6	271.8	271.9	271.5	271.2	270.9	270.8	270.6	270.3	269.9	269.7	269.6	269.4	269.1	268.8	268.4	267.9	267.4	267.2	267.0	266.4	265.6	264.7	263.8	262.9	261.8	260.5	259.2	257.2	255.2	253.5	252.1	250.7	250.3	249.9	249.3	248.6	247.9	247.3	246.8
266.4	266.1	265.8	265.7	265.6	265.5	265.6	265.4	268.5	267.3	269.6	269.5	270.7	270.6	270.6	270.5	270.4	270.4	270.1	269.8	269.6	269.3	269.1	268.8	268.4	268.2	267.9	267.6	267.1	266.5	265.7	264.4	263.2	263.0	262.8	262.2	261.4	260.4	258.4	256.3	254.9	254.0	253.1	252.7	252.3	251.9	251.3	249.3	248.4	247.0
267.0	266.8	266.7	266.6	266.6	266.5	266.4	266.4	266.3	266.2	266.1	266.3	266.5	266.6	266.5	266.2	266.3	269.3	269.5	269.4	269.2	268.9	268.6	268.1	267.5	267.0	266.6	266.2	265.4	264.8	263.7	261.3	249.6	251.6	261.1	260.9	260.3	259.3	257.3	255.3	254.4	253.7	253.1	252.6	252.0	249.8	250.2	249.3	248.0	244.8
268.6	268.4	268.2	267.9	267.6	267.2	266.8	266.4	265.9	265.4	265.1	264.8	264.5	264.2	263.9	263.7	263.6	264.7	265.9	267.0	267.3	267.5	267.8	267.4	266.2	265.0	255.7	254.2	255.6	264.2	264.2	263.8	262.8	260.9	259.1	252.0	251.9	251.8	251.7	251.6	252.6	250.4	249.8	249.4	248.7	248.2	248.2	248.1	246.8	246.3
270.2	270.0	269.6	269.2	268.5	267.9	267.3	266.8	266.3	265.7	265.3	264.8	264.4	264.0	263.6	263.3	263.0	262.7	262.4	261.7	260.9	261.0	266.1	266.1	265.1	264.1	254.1	252.4	260.7	262.5	262.2	253.1	250.0	248.2	247.7	248.7	249.5	249.8	250.1	250.0	249.9	249.7	249.3	249.2	249.3	249.4	249.6	249.8	249.8	249.8
271.5	271.5	271.1	270.7	270.0	269.2	268.6	268.1	267.7	267.3	267.1	266.9	267.0	266.1	265.2	264.5	263.9	263.8	263.7	263.1	262.2	262.2	264.5	264.3	263.4	262.3	260.3	254.1	254.6	255.4	251.9	249.4	248.6	248.2	248.7	250.1	250.7	249.9	249.4	249.4	249.3	249.3	249.5	250.0	250.7	251.4	252.1	252.7	253.2	253.4
272.8	273.0	272.6	272.3	271.7	271.2	270.6	270.2	269.9	269.8	269.7	269.7	269.6	269.6	268.9	268.5	267.6	267.4	266.9	265.8	265.2	264.1	261.4	259.6	258.6	257.8	256.8	255.9	255.2	254.4	252.9	251.4	250.7	250.1	250.4	250.8	250.5	249.9	249.8	250.0	250.0	250.0	250.3	250.9	251.7	252.6	253.5	254.3	255.1	255.3
274.5	273.8	273.6	273.3	273.0	272.7	272.4	272.1	271.9	271.7	271.5	271.3	271.1	271.0	270.8	270.8	270.1	268.9	268.0	267.4	266.8	263.6	262.2	260.9	260.2	259.5	258.7	257.9	256.8	255.7	254.5	253.3	252.6	251.8	251.6	251.4	251.3	251.3	251.3	251.3	251.1	250.9	251.4	251.8	252.6	253.3	253.6	253.9	255.2	256.5
274.6	274.4	274.2	274.3	273.7	273.7	273.6	273.5	273.4	273.3	273.1	272.8	272.9	272.9	272.4	272.3	272.2	270.7	271.0	271.3	269.2	267.8	266.6	265.5	264.5	263.6	262.5	261.3	260.1	258.8	257.7	256.6	255.8	255.0	254.5	253.9	253.6	253.2	252.9	252.6	252.4	252.1	252.6	253.2	254.4	255.6	256.5	257.5	258.5	259.5
275.6	275.3	275.1	275.2	274.9	274.5	274.3	274.2	274.1	274.1	273.9	273.8	273.8	274.0	273.7	273.6	273.6	273.5	273.1	272.8	272.3	271.7	271.2	270.5	269.6	268.7	267.6	266.4	265.2	264.0	263.0	262.0	261.2	260.4	259.7	259.0	258.2	257.4	256.7	256.1	255.6	255.4	255.7	256.6	257.9	259.7	261.4	263.1	263.8	263.5
276.3	276.3	276.1	276.0	275.8	275.6	275.3	275.0	274.7	274.5	274.3	274.3	274.2	274.2	273.9	273.6	273.5	273.4	273.5	273.5	273.4	273.3	273.1	273.0	272.6	272.2	271.6	270.9	270.3	269.5	268.8	268.1	267.4	266.7	266.0	265.2	264.4	263.6	262.8	262.2	261.7	261.7	261.8	262.4	263.1	264.4	265.7	267.3	268.2	268.0
276.3	276.5	276.5	276.4	276.3	276.1	276.0	275.8	275.5	275.2	274.9	274.7	274.5	274.3	274.0	273.7	273.5	273.3	273.3	273.4	273.5	273.4	273.3	273.3	273.2	273.1	273.0	272.8	272.7	272.5	272.3	272.1	271.8	271.5	271.1	270.6	270.1	269.6	269.1	268.8	268.4	268.3	268.3	268.3	268.3	268.7	269.2	270.2	270.9	271.1
276.6	276.9	277.0	277.0	277.1	277.0	277.0	276.6	275.6	275.5	275.1	274.8	274.5	274.3	274.1	273.6	273.1	273.1	273.2	273.3	273.4	273.4	273.3	273.3	273.2	273.0	272.8	272.8	272.9	273.0	273.1	273.2	273.2	273.2	273.2	273.0	272.8	272.7	272.6	272.5	272.5	272.3	272.1	271.7	271.2	270.6	270.7	271.0	271.5	271.9
276.8	277.0	277.1	277.1	277.1	276.9	276.7	276.5	275.4	275.0	274.8	274.4	274.1	273.7	273.4	273.1	273.0	273.0	273.0	273.0	273.0	273.1	273.2	273.2	273.2	272.9	272.7	272.6	272.7	272.8	273.0	273.2	273.2	273.3	273.3	273.3	273.3	273.2	273.3	273.3	273.3	273.3	273.1	272.6	272.0	271.2	271.3	271.7	272.1	272.4
276.8	276.6	276.5	276.4	276.1	275.7	275.4	275.2	275.0	274.9	274.6	274.0	273.3	272.7	272.4	272.3	272.3	272.3	272.3	272.4	272.5	272.7	272.9	273.0	273.0	272.8	272.6	272.4	272.4	272.5	272.7	272.8	273.0	273.1	273.1	273.2	273.2	273.1	273.2	273.3	273.4	273.4	273.4	272.7	272.0	271.3	271.5	272.2	272.6	272.8
274.8	274.2	273.8	273.7	273.6	273.3	273.2	273.1	273.2	273.2	273.0	272.5	272.0	271.8	271.9	272.1	272.2	272.1	272.2	272.2	272.2	272.2	272.4	272.5	272.6	272.6	272.6	272.5	272.5	272.5	272.6	272.7	272.9	273.0	273.1	273.1	273.1	273.0	273.0	273.0	273.2	273.3	273.3	272.6	272.0	271.5	271.9	272.7	273.1	273.3
272.9	272.1	271.5	271.3	271.0	271.1	271.2	271.4	271.6	271.6	271.2	270.9	270.7	271.2	271.6	271.9	272.0	271.9	271.8	271.7	271.9	272.1	272.2	272.4	272.5	272.7	272.7	272.6	272.6	272.6	272.7	272.8	273.0	273.0	273.1	273.1	273.0	272.9	272.8	272.8	273.0	273.1	273.1	272.7	272.3	271.9	272.1	272.7	273.1	273.3
271.9	271.4	270.7	270.4	270.2	270.2	270.4	270.7	270.9	270.9	270.7	270.5	270.4	270.7	271.0	271.4	271.4	271.4	271.2	271.2	271.4	271.8	272.1	272.2	272.5	272.6	272.7	272.7	272.7	272.8	272.8	272.9	272.9	272.9	272.9	272.9	272.9	272.9	272.9	272.9	273.0	272.9	272.8	272.5	272.2	271.9	271.9	272.2	272.6	272.9
271.3	270.8	270.3	270.2	270.3	270.3	270.2	270.3	270.6	270.7	270.4	270.1	270.0	270.0	270.3	270.8	270.9	271.0	270.9	271.1	271.3	271.8	272.0	272.1	272.4	272.5	272.5	272.5	272.6	272.6	272.7	272.7	272.8	272.9	273.1	273.2	273.2	273.1	273.0	273.0	272.8	272.4	272.0	271.5	271.1	270.8	270.8	271.1	271.6	272.1
271.4	271.1	270.8	270.6	270.7	270.7	270.6	270.9	271.0	270.9	270.5	270.4	270.7	270.7	270.7	270.6	270.8	270.8	270.6	270.7	270.9	271.3	271.8	272.2	272.3	272.3	272.3	272.3	272.4	272.5	272.6	272.7	272.8	272.9	272.9	272.9	273.1	272.9	272.8	272.9	272.5	271.9	271.0	270.1	269.4	269.0	269.3	269.7	270.5	271.0
271.6	271.2	270.9	270.6	270.6	270.7	270.8	271.0	271.0	270.8	270.4	270.4	270.5	270.4	270.5	270.5	270.8	271.0	271.2	271.1	271.2	271.5	271.9	272.1	272.2	272.1	272.0	272.0	272.0	272.1	272.3	272.5	272.6	272.8	272.8	272.8	272.8	272.7	272.7	272.6	272.1	271.1	269.8	268.5	267.5	267.0	267.5	268.2	269.2	269.6
271.8	271.3	270.9	270.5	270.7	270.8	270.9	270.9	270.6	269.9	269.5	269.3	269.4	269.7	270.1	270.7	270.7	270.8	271.0	270.9	271.0	271.3	271.7	272.0	272.2	272.0	271.9	271.8	271.9	271.9	272.0	272.2	272.5	272.7	272.7	272.7	272.6	272.4	272.2	272.1	271.3	270.1	268.4	266.7	265.6	265.2	266.2	267.3	268.5	268.7
271.9	271.5	271.1	270.9	271.0	271.1	271.2	271.1	270.6	269.9	269.3	269.7	270.0	270.2	270.7	271.3	271.7	271.7	271.6	271.4	271.1	271.4	271.9	271.9	271.9	271.8	271.9	271.9	271.9	271.7	271.6	271.6	272.1	272.6	272.7	272.8	272.6	272.3	271.9	271.2	270.0	268.3	266.5	265.0	264.1	264.5	265.8	267.2	268.1	268.3
271.9	271.7	271.4	271.3	271.3	271.4	271.4	271.3	271.1	270.6	269.9	270.2	270.9	271.1	271.3	271.5	271.9	272.1	272.2	272.3	272.0	272.0	271.9	271.7	271.5	271.5	271.7	271.8	271.6	271.4	271.2	271.1	271.6	272.4	272.8	273.0	272.8	272.5	271.9	271.0	269.0	267.1	265.4	264.1	263.9	264.9	266.0	266.9	267.3	267.5
272.2	272.0	271.8	271.5	271.5	271.5	271.5	271.4	271.2	270.6	270.0	269.8	270.5	270.5	270.2	270.1	270.3	270.9	271.6	271.7	272.0	272.1	272.0	271.6	271.4	271.4	271.4	271.5	271.4	271.1	270.8	270.7	271.4	272.1	272.7	273.0	272.9	272.7	272.2	271.2	269.3	267.4	265.8	264.2	264.4	265.0	265.8	266.0	266.3	266.2
272.6	272.3	272.0	271.7	271.5	271.2	271.0	270.9	270.7	270.2	269.6	269.3	269.6	269.1	268.6	268.6	269.4	270.1	270.6	270.6	271.4	271.9	272.1	271.8	271.5	271.4	271.4	271.4	271.1	270.9	270.7	270.7	271.2	271.9	272.4	272.8	272.9	272.6	272.0	270.8	269.0	267.4	265.9	264.7	264.5	264.9	265.3	265.2	265.1	264.9
272.9	272.6	272.2	271.9	271.4	271.1	270.8	270.6	270.4	270.1	269.8	269.7	269.1	268.9	269.0	269.1	269.6	270.0	270.2	270.4	270.7	271.2	271.5	271.6	271.1	271.1	271.4	271.2	271.1	270.9	270.8	270.8	271.2	271.8	272.3	272.7	272.6	271.9	270.5	268.7	267.0	265.8	264.8	264.0	264.1	264.3	264.6	264.6	264.1	263.6
273.2	272.7	272.3	272.0	271.5	271.1	270.8	270.5	270.4	270.4	270.4	270.2	270.2	270.2	270.3	270.3	270.5	270.5	270.5	270.3	270.2	270.4	270.4	269.9	270.8	271.0	270.9	271.0	271.1	271.1	271.1	271.2	271.6	272.0	272.3	272.3	271.4	269.5	267.3	265.0	263.9	263.3	262.9	262.7	262.6	262.8	263.1	263.1	262.7	262.2
273.5	273.0	272.4	272.0	271.7	271.3	271.0	270.8	270.8	270.8	270.9	271.0	271.3	271.4	271.4	271.5	271.4	271.2	270.8	270.2	269.9	269.9	269.7	268.8	270.4	270.7	270.6	271.0	271.3	271.4	271.6	271.8	271.9	272.1	272.0	271.5	269.7	267.3	264.9	262.9	262.1	261.6	261.4	261.4	261.5	261.6	261.8	261.7	261.6	261.7
273.4	273.4	273.2	272.7	272.3	271.9	271.6	271.2	271.2	271.3	271.5	271.7	271.9	272.1	272.3	272.4	272.2	271.8	271.0	269.4	268.7	269.7	270.6	269.8	270.9	271.1	271.1	271.2	271.3	271.3	271.4	271.7	271.9	271.9	271.3	270.3	268.6	266.4	264.2	262.5	261.7	261.2	261.1	261.3	261.7	261.9	262.1	262.2	262.9	263.2
272.6	272.7	273.0	273.1	272.5	272.0	271.8	271.9	272.0	272.0	272.0	272.2	272.5	272.8	273.0	273.1	272.9	272.7	272.4	272.0	271.7	271.5	271.8	271.9	271.8	271.7	271.6	271.8	271.7	271.6	271.5	271.7	271.7	271.3	270.5	269.4	268.0	266.3	264.7	263.2	262.0	262.2	262.3	262.2	262.2	262.6	263.1	264.0	264.8	265.0
272.5	272.1	272.2	272.8	272.6	272.3	272.2	272.2	272.3	272.3	272.6	273.0	273.4	273.7	273.8	273.8	273.8	273.8	273.8	273.7	273.4	273.1	273.0	272.8	272.6	272.4	272.3	272.3	272.2	272.0	271.8	271.9	271.7	270.8	269.8	268.6	267.6	265.2	263.9	263.3	262.4	263.8	264.4	264.3	263.9	264.4	264.7	265.3	265.5	264.4
272.9	272.2	271.9	272.2	272.6	272.6	272.8	273.0	273.2	273.9	273.6	273.7	274.1	274.5	275.0	276.1	276.0	275.7	274.8	274.3	274.0	273.7	273.5	273.3	273.2	273.0	273.0	273.1	273.0	272.7	272.4	272.0	272.0	271.3	270.0	268.6	267.6	266.7	265.5	264.8	263.7	266.4	266.9	266.4	265.8	266.4	265.2	264.1	264.2	263.6
272.4	272.0	272.0	272.4	273.0	273.3	273.9	276.1	276.4	276.6	276.4	275.9	275.4	275.6	276.2	276.8	276.8	275.9	274.6	274.2	274.0	273.9	273.7	273.4	273.3	273.3	273.4	273.6	273.6	273.3	272.8	272.3	273.0	272.7	271.9	270.6	269.5	267.4	267.5	266.8	266.5	266.7	266.5	266.2	266.0	266.2	263.3	262.5	262.3	263.4
272.4	272.5	272.9	273.2	273.7	274.3	275.3	277.9	278.5	278.7	278.5	278.1	276.9	276.4	278.9	278.9	278.5	275.6	274.3	274.0	274.0	273.9	273.4	272.3	272.2	272.8	273.5	273.8	274.1	273.7	273.4	273.1	273.7	273.8	273.3	273.6	272.7	271.4	269.5	268.3	267.7	267.4	267.2	266.8	266.0	264.8	264.3	263.3	263.1	263.2
273.9	273.9	274.0	273.7	274.3	275.1	278.2	279.5	279.8	279.9	279.8	279.7	279.8	279.6	280.0	280.3	280.3	279.3	278.7	274.1	273.2	272.5	271.3	269.0	269.1	271.0	273.1	273.9	274.4	274.5	274.3	274.7	275.5	275.8	276.3	275.1	274.1	271.9	269.0	266.6	267.1	267.6	267.6	267.3	266.6	266.8	265.9	265.1	264.7	265.7
273.9	274.0	273.9	273.8	274.9	278.3	279.4	280.2	280.3	280.2	280.2	280.2	280.2	280.4	280.6	280.9	281.2	281.2	280.7	279.9	278.3	272.6	269.4	264.8	263.3	265.9	270.2	272.2	272.6	273.1	274.2	276.2	277.2	277.7	277.8	277.6	274.2	271.6	268.1	265.9	266.9	267.7	267.8	267.6	267.6	267.8	267.9	267.8	267.5	267.1
272.7	273.3	273.9	274.8	275.8	279.3	280.3	280.8	280.8	280.8	280.5	280.1	279.7	279.8	280.3	280.8	281.3	281.4	281.5	281.4	280.6	279.4	277.6	265.5	262.0	260.9	263.3	265.6	267.0	268.2	270.1	275.9	277.6	278.8	278.6	278.7	277.7	275.3	269.0	267.5	268.0	268.3	268.3	268.2	268.2	268.6	268.9	268.8	268.7	268.3
271.6	272.9	274.5	275.9	277.6	280.2	281.0	281.2	281.1	280.8	280.3	275.9	274.1	274.0	278.6	279.6	280.5	281.0	281.4	281.7	281.7	281.7	277.9	264.8	260.9	258.0	258.7	263.5	266.9	266.7	268.0	271.0	277.1	278.8	279.1	279.5	278.7	272.5	270.1	268.3	269.0	269.2	269.1	268.9	268.5	268.4	268.9	269.9	270.5	270.4
273.0	274.2	275.7	277.0	278.5	280.1	280.8	279.7	278.6	273.3	273.8	273.0	272.3	272.4	272.0	272.6	274.0	278.3	278.2	278.9	277.6	276.5	262.6	259.6	259.3	258.6	259.2	265.2	270.0	270.7	270.2	270.8	273.4	278.3	279.3	280.0	279.7	277.6	271.9	270.6	270.1	270.0	269.9	270.2	270.0	270.0	270.5	271.4	272.0	272.0
279.8	276.9	278.9	277.5	277.8	277.8	275.3	272.9	271.9	271.4	271.6	272.1	272.3	272.1	271.3	270.5	269.7	268.7	267.6	265.6	263.3	261.4	259.7	259.0	260.4	261.5	262.6	263.9	265.1	270.4	273.1	273.0	273.0	275.3	279.3	280.7	280.9	279.2	274.1	271.6	271.0	271.0	271.1	271.5	271.7	272.0	272.2	272.4	272.7	272.9
282.5	282.0	279.0	277.8	276.2	274.7	272.7	271.6	271.8	271.6	271.4	271.5	271.8	271.9	271.0	269.4	267.4	265.6	264.3	262.8	261.0	261.0	261.3	261.0	261.0	261.6	263.2	263.9	263.2	266.3	271.1	273.0	274.4	279.3	281.0	282.0	282.0	281.2	278.0	273.4	272.3	272.2	272.8	273.2	273.1	272.9	272.8	273.2	273.4	273.3
284.3	284.7	284.0	279.3	277.5	274.9	272.8	271.4	271.8	271.2	270.6	270.3	270.9	271.2	269.7	267.0	267.9	267.8	268.0	267.8	266.9	264.8	263.1	262.5	262.6	262.6	263.1	264.1	263.8	265.3	266.2	269.9	273.3	280.1	282.5	283.1	283.3	282.7	279.6	275.1	273.9	273.8	274.3	274.7	274.7	274.2	273.5	273.3	273.5	273.8
285.5	286.5	286.7	282.6	277.0	273.9	272.8	271.4	272.0	271.5	270.6	270.0	269.8	270.2	270.3	269.7	269.0	266.6	270.4	271.5	271.1	268.0	266.2	266.1	265.3	264.1	263.7	264.1	263.2	262.8	264.4	268.7	272.4	281.2	283.8	284.0	284.0	283.5	280.8	276.6	275.7	275.4	275.0	274.8	275.4	275.9	275.4	274.2	273.9	274.3
286.6	287.0	286.9	285.8	276.5	273.0	271.6	271.4	272.2	271.4	270.3	269.8	269.4	270.4	272.8	273.5	272.4	272.9	274.7	275.1	274.1	272.4	272.0	272.0	270.7	268.4	265.9	265.0	264.5	264.6	265.2	268.4	272.9	276.0	281.8	283.2	284.6	284.9	282.5	278.3	276.2	274.6	273.4	273.0	273.8	275.4	276.8	276.5	275.4	275.0
287.5	287.6	288.3	288.0	286.1	280.8	273.3	272.3	278.7	274.2	272.4	271.0	271.2	278.6	278.4	280.2	275.8	275.5	277.2	277.6	277.5	277.0	277.1	277.6	277.2	275.2	271.6	268.3	267.2	266.5	267.3	269.2	271.5	273.3	274.3	276.9	279.8	282.1	277.5	275.6	273.6	272.1	271.6	271.8	272.5	273.7	275.4	276.7	276.4	275.5
287.8	288.0	288.3	288.7	288.9	288.1	287.1	286.6	286.8	286.9	284.8	281.2	281.9	285.4	285.9	280.6	278.1	277.3	278.2	278.6	279.1	279.7	280.5	281.1	281.1	279.8	277.1	273.7	270.8	269.2	269.6	270.3	270.3	270.3	270.6	270.2	270.1	271.4	272.4	271.8	271.3	271.8	272.6	273.1	273.2	273.0	273.6	275.4	276.5	276.3
287.3	287.7	288.2	288.6	289.0	289.1	289.3	289.4	289.7	289.7	289.0	288.2	287.9	288.8	287.1	280.5	278.6	278.2	278.6	279.5	280.4	281.3	282.2	282.9	283.2	282.7	281.3	279.0	275.7	272.2	270.4	270.2	269.2	268.8	270.6	272.2	271.9	270.3	270.8	272.1	273.0	273.9	274.6	274.5	274.3	273.9	273.8	274.4	275.4	276.4
288.2	288.1	288.2	288.6	289.0	289.3	289.3	289.1	289.1	289.2	289.0	288.8	288.8	288.9	286.4	278.4	276.9	277.6	278.3	279.9	280.8	281.5	282.1	282.9	283.6	284.0	283.7	282.5	279.3	274.9	272.1	271.3	269.8	269.2	270.3	272.5	273.7	273.7	273.8	274.2	274.4	274.7	275.1	275.3	275.4	275.2	275.2	274.8	274.9	275.8
288.6	288.5	288.5	288.7	289.2	289.6	289.7	289.4	289.2	289.2	289.2	289.2	289.1	289.0	285.8	276.5	275.8	277.0	277.9	279.5	280.2	280.7	281.5	282.5	283.3	283.8	284.0	283.8	281.9	278.3	275.6	274.4	272.0	270.4	270.0	270.8	272.0	273.0	273.7	274.2	274.5	275.1	275.7	275.9	275.6	275.0	274.8	275.4	275.7	275.9
289.1	289.1	289.0	289.1	289.4	289.8	290.0	289.8	289.6	289.4	289.3	289.3	289.1	288.2	282.0	276.9	276.4	277.3	278.1	278.9	279.7	280.4	281.2	282.3	283.2	283.6	283.7	283.8	283.7	282.1	280.5	279.7	277.3	273.2	271.0	271.5	272.7	273.5	274.3	275.0	275.5	276.1	276.7	276.9	276.6	275.8	274.6	274.8	276.3	276.4
288.4	289.6	289.6	289.4	289.8	289.9	290.1	290.0	289.1	289.0	289.3	289.1	288.7	286.2	280.0	277.7	277.2	277.8	278.3	278.6	279.5	280.5	281.5	282.5	283.0	283.3	283.4	283.4	284.1	284.3	284.0	284.0	283.2	278.5	272.8	272.3	274.1	275.7	276.2	276.1	276.6	277.1	277.1	277.7	278.5	278.2	275.9	274.6	276.2	276.9
284.5	286.2	286.4	288.5	289.6	289.9	289.7	289.4	286.9	282.7	287.8	288.2	286.8	282.2	279.8	278.3	277.8	278.2	278.3	278.4	279.3	280.5	281.9	282.7	282.8	282.8	283.1	283.6	284.2	284.8	284.9	285.2	285.6	283.3	277.0	273.0	273.1	275.4	276.9	276.6	276.8	277.6	276.9	277.8	280.0	280.1	277.9	275.6	276.3	277.0
286.5	286.6	286.1	285.4	285.3	284.9	284.5	284.6	281.5	281.1	282.8	282.8	281.4	280.5	278.9	277.7	277.6	278.4	278.4	278.5	279.0	280.0	281.5	282.3	282.5	282.3	282.8	283.7	284.5	285.2	285.5	285.7	286.1	286.4	283.0	276.7	272.9	273.5	275.7	276.3	276.5	277.3	276.5	277.0	280.0	281.0	279.7	277.0	276.3	277.0
287.9	287.5	286.7	285.8	285.2	284.4	284.0	283.4	282.5	281.7	281.6	281.0	280.1	279.5	278.3	277.4	277.7	278.2	278.6	278.7	278.9	279.7	280.8	281.8	282.2	282.2	282.7	283.4	284.4	285.0	285.7	286.5	287.3	289.7	286.5	282.4	276.7	274.4	275.1	276.2	276.5	276.8	275.6	275.5	278.9	281.5	281.2	278.3	276.5	277.3
287.7	287.5	286.7	285.9	285.6	284.6	284.1	284.0	283.8	282.7	281.7	281.2	280.0	279.3	278.2	277.6	278.2	278.3	279.0	279.2	279.2	279.8	280.5	281.4	281.9	282.1	282.5	283.1	284.1	284.4	285.3	286.8	288.2	290.8	291.0	287.6	282.1	277.9	277.3	277.4	277.3	277.7	276.7	276.3	278.9	281.3	282.0	280.2	277.2	277.2
286.3	286.2	285.5	285.2	284.3	282.3	283.2	284.1	284.4	283.3	281.4	281.8	282.2	282.9	281.3	278.3	278.0	278.7	279.3	279.7	279.6	279.9	280.6	281.4	281.8	281.9	282.3	283.2	284.2	284.4	284.8	286.5	288.6	291.1	292.2	291.5	287.2	282.8	281.6	281.1	280.3	280.7	280.6	280.8	282.5	282.6	282.6	281.8	278.6	277.3
283.3	283.6	283.7	283.1	282.1	280.2	281.0	282.7	283.3	283.0	281.4	283.2	287.3	290.5	288.7	281.7	278.1	278.9	279.7	280.1	279.9	279.9	280.5	281.3	282.1	282.2	282.5	283.6	284.6	284.9	284.8	286.0	288.0	290.5	293.1	294.2	292.0	287.5	285.0	284.1	284.4	285.3	285.6	285.4	285.3	284.7	284.3	283.9	281.5	278.6
279.4	281.0	281.3	281.6	280.9	280.2	279.8	280.4	282.7	282.8	281.9	282.0	285.9	292.3	292.9	286.9	281.5	279.5	280.1	280.2	279.9	280.2	280.4	281.2	282.0	282.5	283.2	284.1	284.6	284.9	285.1	285.9	287.2	289.9	292.4	294.7	295.0	293.3	291.1	289.0	289.6	290.9	291.1	289.9	286.1	284.6	285.2	285.6	284.6	281.9
278.0	277.7	278.2	281.3	280.8	280.5	280.4	279.5	280.1	282.1	283.3	283.6	284.7	290.7	294.4	292.2	287.6	282.6	281.8	281.3	280.2	280.8	281.5	282.4	282.8	283.3	283.9	284.2	284.3	284.6	285.0	285.8	286.9	289.0	291.0	293.2	294.8	295.2	294.6	293.7	293.4	293.3	293.1	291.9	289.5	287.6	287.3	287.1	286.9	286.2
278.4	277.7	277.9	281.2	281.1	280.0	279.2	279.2	280.5	280.6	283.7	285.1	283.8	286.2	293.1	295.1	292.4	286.4	283.7	283.1	281.7	281.6	282.3	283.3	283.6	283.7	284.3	284.6	284.5	284.5	285.0	285.8	287.0	288.5	290.8	293.0	293.6	294.4	294.6	294.2	293.6	292.9	292.7	292.3	292.2	292.3	292.0	290.8	290.4	289.7
277.8	276.9	277.4	279.5	280.3	279.2	279.6	280.5	280.8	281.4	283.9	285.9	284.5	284.5	292.3	294.5	294.2	289.2	286.5	284.5	283.4	283.1	283.2	284.0	284.1	283.9	284.5	285.1	285.4	285.6	286.1	286.5	287.3	288.6	290.5	292.4	292.6	293.0	293.0	292.6	292.9	292.7	291.7	291.8	292.7	292.6	292.7	292.5	292.1	291.4
277.5	276.2	277.2	279.0	279.2	279.8	280.6	281.4	281.7	282.1	284.0	285.8	284.7	284.5	286.8	294.5	295.3	295.1	293.0	287.9	285.1	284.2	284.2	284.9	285.1	285.1	285.6	286.4	286.9	286.9	287.1	287.2	287.9	289.2	290.4	291.7	292.0	292.0	291.7	291.6	292.8	292.3	290.8	289.9	291.8	292.4	292.7	293.2	293.2	292.9
277.1	276.1	276.3	278.0	279.1	280.0	280.8	281.6	282.1	282.3	283.2	284.2	284.3	284.8	287.8	294.3	295.5	295.9	295.7	290.9	287.3	284.9	284.8	285.7	286.1	286.5	287.2	288.2	288.6	287.8	287.6	287.9	288.8	290.0	290.8	291.4	292.0	291.9	291.5	291.3	291.8	292.2	291.1	289.6	289.8	290.8	291.9	293.1	293.6	293.6
276.6	276.1	276.8	278.0	279.0	279.7	280.6	281.4	281.9	282.1	282.7	283.7	284.2	284.7	287.8	290.9	295.1	295.9	296.2	294.7	289.2	285.5	285.1	286.1	287.0	287.7	288.5	289.5	289.4	288.5	288.3	288.9	289.9	290.8	291.3	291.5	291.8	291.6	291.2	290.9	291.2	292.0	292.0	290.9	290.5	291.0	291.8	293.2	293.9	294.0
277.0	276.4	277.2	278.2	278.9	279.6	280.7	281.6	282.1	282.1	282.6	283.8	284.4	284.9	287.0	289.2	292.3	295.6	296.6	293.6	290.5	286.1	285.2	286.4	288.1	289.2	289.6	290.3	289.9	289.2	289.3	290.0	290.8	291.3	291.5	291.7	291.8	291.7	291.4	291.2	291.3	291.8	292.3	292.4	292.8	293.5	294.0	294.1	294.4	294.4
277.7	277.3	277.8	278.4	279.1	280.1	281.2	282.2	282.9	283.2	283.7	284.6	285.4	286.2	287.7	288.5	291.0	295.4	296.9	296.1	292.4	288.3	286.6	287.1	288.7	289.9	290.7	291.1	290.6	290.0	290.3	291.0	291.5	291.7	291.8	292.0	292.0	291.9	291.7	291.6	291.7	291.9	292.3	293.0	294.2	295.1	295.0	294.9	295.0	294.8
278.2	278.2	278.4	278.7	279.5	280.8	281.9	282.9	283.6	284.1	284.8	285.5	286.5	287.9	289.4	289.4	290.8	295.4	297.3	297.0	296.7	291.4	290.1	288.3	288.6	289.6	290.7	291.5	291.1	290.7	291.0	291.6	291.9	292.0	292.2	292.5	292.4	292.2	292.0	292.1	292.1	292.1	292.4	293.6	295.1	295.3	295.4	295.4	295.3	295.2
278.4	278.8	279.1	279.2	279.9	281.1	282.4	283.9	284.3	284.5	285.0	285.6	287.2	289.6	291.2	290.5	290.8	295.3	297.7	297.8	297.9	297.1	294.1	290.1	287.8	288.5	290.2	291.5	291.5	291.2	291.6	292.0	292.3	292.6	293.0	293.2	292.9	292.5	292.2	292.3	292.4	292.6	293.3	294.8	296.2	295.7	295.8	295.8	295.8	295.8
278.9	279.2	279.8	280.0	280.5	281.5	282.5	283.9	285.2	285.9	285.8	286.4	288.6	291.2	292.6	291.5	291.0	294.9	297.2	298.4	298.4	297.6	295.8	292.6	287.7	287.5	290.0	291.7	291.8	291.7	292.3	292.7	292.9	293.3	293.7	293.9	293.5	292.7	292.3	292.3	292.6	293.5	294.7	295.2	296.2	296.2	296.2	296.3	296.4	296.3
280.0	280.4	281.0	281.5	281.9	282.6	283.3	284.1	285.7	286.9	287.0	288.0	290.1	292.4	293.6	292.9	292.1	293.1	294.1	297.5	298.2	297.7	298.0	295.5	290.6	287.5	290.1	292.5	292.0	292.2	293.0	293.4	293.5	293.5	293.5	293.4	293.0	292.4	292.0	292.1	292.9	294.7	295.4	296.0	296.5	296.5	296.6	296.8	297.0	296.7
281.1	281.7	282.0	282.5	283.2	284.1	284.9	285.4	286.0	286.8	287.7	289.3	291.2	293.2	294.5	294.4	293.9	293.2	292.8	296.8	297.6	298.1	298.8	298.7	294.9	289.7	289.9	292.5	292.3	292.4	292.6	292.8	292.6	292.3	292.0	291.9	291.9	291.8	292.0	292.9	294.0	295.0	296.1	296.6	296.8	296.8	297.0	297.2	297.3	297.1
282.1	282.3	282.5	282.8	283.7	284.8	285.7	286.2	286.6	287.3	288.6	289.8	291.5	293.4	294.8	295.5	295.5	294.4	292.5	292.9	297.3	298.6	299.2	299.0	298.0	292.2	289.6	291.7	292.0	291.5	291.1	291.0	290.9	290.8	291.1	292.2	293.7	293.7	294.0	295.0	295.3	295.9	296.3	296.6	296.8	297.0	297.3	297.6	297.7	297.6
282.8	282.2	282.0	282.6	284.0	285.2	286.0	286.7	287.5	288.5	289.5	290.3	291.4	292.7	294.4	295.7	295.7	294.6	292.3	292.7	296.4	298.7	298.7	298.7	298.5	292.8	288.9	291.8	292.7	291.6	290.7	290.0	290.1	290.9	292.3	294.1	296.3	296.8	296.6	296.5	296.2	296.1	296.2	296.6	296.8	297.2	297.4	297.7	297.8	298.0
283.2	282.0	282.1	283.2	284.8	285.7	286.4	287.4	288.5	289.5	290.0	290.4	291.2	292.4	294.0	295.1	295.0	294.2	292.0	290.6	294.0	297.1	298.1	298.3	298.2	293.3	288.5	290.4	291.5	290.3	289.5	289.5	290.4	292.4	295.9	296.8	297.4	297.7	297.3	296.7	296.3	296.2	296.3	296.6	296.9	297.2	297.5	297.8	298.0	298.2
282.9	282.8	284.1	285.2	285.9	286.3	286.8	287.6	288.6	289.4	290.0	290.5	291.4	292.7	294.0	295.0	294.9	293.9	291.8	289.2	292.0	296.9	298.0	297.5	297.3	294.2	289.8	289.1	289.6	290.0	291.2	292.4	293.7	296.1	297.6	298.2	298.4	298.1	297.4	296.9	296.6	296.5	296.6	296.8	297.0	297.3	297.6	297.8	298.0	298.3
282.5	284.2	285.7	286.4	286.7	286.8	287.0	287.6	288.4	289.2	290.1	290.9	292.0	293.1	294.6	295.4	294.4	292.7	290.8	288.8	291.3	296.4	297.7	297.1	297.0	296.5	293.4	292.5	292.2	293.9	297.0	297.1	297.7	298.3	298.6	298.7	298.6	298.3	297.7	297.2	297.0	296.9	296.9	297.0	297.2	297.4	297.7	297.9	298.1	298.4
284.6	286.2	286.9	287.4	287.7	287.8	287.8	288.2	288.6	289.5	290.8	291.6	292.5	293.8	295.2	295.1	293.2	290.9	289.4	288.5	291.0	295.6	296.7	296.4	296.3	297.5	296.5	297.7	297.0	297.7	298.2	298.5	298.5	298.5	298.4	298.6	298.7	298.5	298.0	297.5	297.4	297.3	297.2	297.2	297.4	297.6	297.8	298.0	298.2	298.5
287.8	288.0	288.0	288.4	288.7	288.9	288.9	288.9	289.1	290.4	291.9	292.4	292.8	293.9	294.5	294.2	292.6	290.4	288.9	288.0	290.3	294.5	295.3	295.1	295.7	297.1	297.8	298.3	298.3	298.4	298.1	297.8	297.8	297.5	297.4	298.0	298.5	298.7	298.3	297.8	297.6	297.6	297.4	297.4	297.5	297.8	298.0	298.1	298.3	298.6
289.2	289.0	289.0	289.4	289.8	290.3	290.4	289.9	290.5	292.3	293.5	293.5	293.1	293.4	293.8	293.2	291.8	289.7	288.6	287.5	289.5	293.7	294.8	294.5	294.7	297.0	297.8	297.9	297.8	297.5	297.2	296.2	294.5	294.8	296.2	297.2	298.2	298.6	298.4	298.0	297.8	297.7	297.6	297.6	297.7	297.9	298.1	298.3	298.5	298.7
289.6	289.5	289.7	290.2	290.9	291.6	292.1	291.9	292.5	293.9	294.4	294.4	293.8	293.3	293.7	293.0	291.6	290.3	289.7	288.2	289.5	293.4	294.5	294.0	293.0	293.7	294.2	294.7	294.8	294.6	294.2	293.0	293.2	294.1	295.8	297.6	298.2	298.5	298.2	298.0	297.9	297.8	297.8	297.9	298.0	298.1	298.3	298.5	298.7	298.9
289.6	289.7	290.1	290.9	291.7	292.5	293.2	293.5	293.9	294.6	294.8	295.4	294.5	293.1	293.1	292.8	291.7	290.6	289.6	288.2	290.1	293.1	293.3	292.9	291.6	291.3	292.3	293.1	293.7	294.0	293.7	293.1	293.1	294.3	296.6	298.0	298.3	298.4	298.2	298.1	298.0	298.0	298.0	298.2	298.3	298.4	298.5	298.7	298.9	299.1
289.8	290.0	290.9	291.8	292.5	293.2	293.8	294.4	294.7	294.9	295.3	296.2	295.4	293.7	292.5	291.8	290.9	289.4	288.3	288.5	290.8	292.3	292.5	293.5	293.2	292.5	292.8	293.6	294.3	294.7	294.7	294.4	294.5	295.6	297.1	298.0	298.4	298.4	298.3	298.3	298.3	298.2	298.3	298.4	298.6	298.6	298.7	299.0	299.2	299.4
290.8	290.9	291.8	292.7	293.4	293.9	294.6	295.3	295.7	295.4	295.6	296.2	296.6	295.7	292.8	290.1	289.9	289.0	288.3	288.9	289.9	291.9	294.4	296.3	296.2	295.3	294.9	295.5	295.9	295.7	295.2	295.1	295.8	297.3	297.9	298.1	298.4	298.4	298.5	298.5	298.5	298.5	298.6	298.6	298.8	298.9	299.1	299.3	299.5	299.4
292.1	292.3	292.8	293.4	294.3	294.9	295.4	296.1	296.4	296.0	295.7	295.9	297.3	297.2	293.4	289.9	289.7	289.8	289.4	288.3	288.6	292.1	296.1	298.1	298.0	297.2	296.5	296.4	296.7	296.7	296.4	296.5	297.2	297.9	297.9	298.1	298.4	298.5	298.6	298.7	298.7	298.8	298.8	298.9	299.0	299.3	299.6	299.7	299.4	298.9
293.0	293.5	293.7	294.0	294.8	295.6	296.2	296.7	296.9	296.7	296.0	295.9	297.2	297.4	294.8	292.3	291.4	291.6	289.8	288.6	289.8	293.8	297.1	298.4	298.7	298.6	297.7	297.0	297.0	297.5	297.7	298.0	298.1	297.5	297.9	298.2	298.3	298.5	298.7	298.9	299.1	299.1	299.1	299.1	299.3	299.7	299.9	299.7	299.1	298.7
293.5	293.8	294.0	294.5	295.3	296.0	296.5	296.8	297.0	297.0	296.7	297.2	297.6	296.7	295.1	294.2	292.4	291.8	291.1	291.0	293.7	297.0	298.5	298.5	298.7	298.9	298.4	297.8	297.6	298.3	298.6	298.8	298.7	297.7	298.0	298.2	298.4	298.6	298.8	299.0	299.1	299.2	299.2	299.3	299.6	299.9	300.0	299.6	299.1	298.9
294.5	294.2	294.0	294.5	295.6	296.3	296.5	296.6	296.9	297.4	297.6	298.6	299.0	297.3	295.9	296.1	294.9	294.0	293.4	294.5	296.5	298.1	299.3	299.6	299.2	298.5	298.2	298.1	298.0	298.8	299.4	299.5	297.9	298.1	298.3	298.3	298.4	298.5	298.7	298.9	299.1	299.2	299.3	299.5	299.7	299.9	299.9	299.4	299.0	298.9
294.6	294.5	294.5	295.0	295.9	296.5	296.5	296.3	296.4	296.9	297.0	296.8	297.6	298.2	298.2	299.8	299.4	298.0	296.1	296.3	297.6	298.7	299.8	300.4	300.1	298.5	297.4	298.0	298.5	299.3	300.3	299.1	298.5	298.6	298.6	298.5	298.5	298.6	298.7	298.8	299.0	299.2	299.3	299.6	299.8	299.8	299.6	299.3	299.0	298.9
294.4	294.4	294.7	295.1	295.8	296.4	296.6	296.4	296.2	296.7	295.7	294.1	294.6	296.9	299.3	301.2	301.8	300.8	298.8	298.2	298.8	299.9	300.7	301.2	300.9	299.1	297.8	298.5	299.4	300.1	300.5	299.0	299.0	298.9	298.8	298.7	298.7	298.7	298.8	298.9	299.0	299.2	299.3	299.5	299.6	299.6	299.4	299.2	299.2	298.9
294.6	294.4	294.4	294.5	294.5	294.7	295.4	295.4	295.6	296.7	295.3	294.2	294.2	295.8	298.9	301.1	302.0	301.6	300.6	300.4	300.7	301.3	301.6	301.8	301.2	299.8	299.3	300.0	300.4	299.5	299.1	299.2	299.3	299.1	298.9	298.9	298.9	298.9	299.0	299.0	299.1	299.3	299.4	299.5	299.4	299.3	299.4	299.4	299.4	299.1
295.1	294.9	294.8	294.5	294.1	293.9	294.1	293.4	294.0	295.8	294.8	294.7	294.3	294.6	297.2	299.7	300.3	300.6	300.5	301.0	301.6	302.2	302.4	302.3	301.7	301.1	300.7	300.6	300.3	299.1	299.2	299.4	299.3	299.2	299.0	299.0	299.0	299.1	299.1	299.1	299.2	299.4	299.5	299.5	299.4	299.4	299.5	299.5	299.5	299.3
295.3	295.1	294.8	294.6	294.2	293.7	293.5	292.7	293.0	294.1	293.7	293.7	293.1	292.3	294.2	296.9	297.4	299.1	300.4	300.8	301.5	302.3	302.7	302.9	302.4	301.7	300.3	298.9	298.9	299.1	299.4	299.4	299.3	299.2	299.1	299.0	299.0	298.9	299.0	299.1	299.3	299.4	299.5	299.5	299.7	299.7	299.5	299.3	299.3	299.3
295.4	295.1	294.6	294.1	293.7	293.4	292.7	292.0	292.3	292.8	292.8	292.8	292.4	291.0	291.7	293.6	293.8	296.4	299.4	300.3	301.2	302.2	302.7	302.8	302.2	301.3	299.0	298.8	298.9	299.1	299.3	299.4	299.4	299.2	299.1	299.0	298.9	298.8	298.9	299.2	299.4	299.4	299.5	299.6	299.8	299.7	299.3	299.1	299.3	299.2
295.4	295.2	294.6	293.8	293.2	292.5	291.8	291.2	291.6	292.4	293.0	293.6	293.2	291.5	291.2	290.8	290.7	294.0	298.2	299.7	300.6	301.6	302.1	302.1	301.6	299.4	298.9	298.8	298.8	299.0	299.3	299.5	299.4	299.3	299.1	299.0	298.9	298.9	299.1	299.3	299.5	299.6	299.6	299.5	299.6	299.4	299.2	299.2	299.2	298.9
295.4	295.2	294.5	293.7	293.0	291.6	290.5	290.6	291.4	292.4	293.3	294.0	293.3	291.7	290.6	290.3	290.9	294.0	297.8	299.2	300.0	300.8	301.2	301.3	299.5	299.1	298.9	298.8	298.9	299.1	299.4	299.6	299.6	299.4	299.2	299.1	299.2	299.3	299.4	299.6	299.8	299.8	299.9	299.7	299.5	299.4	299.3	299.3	299.2	298.8
295.3	295.1	294.3	293.5	292.7	291.1	289.6	289.9	291.0	292.2	293.3	293.7	292.8	291.5	290.8	292.1	293.0	294.6	297.5	298.9	299.7	300.4	300.2	299.5	299.3	299.0	298.8	299.0	299.1	299.4	299.6	299.8	299.8	299.6	299.4	299.4	299.7	299.9	300.0	300.0	300.0	300.0	300.0	299.8	299.4	299.3	299.2	299.1	299.1	299.0
294.9	294.7	294.0	293.2	292.4	290.6	289.2	289.7	290.9	292.1	293.1	293.2	292.5	291.5	291.3	294.1	293.6	294.2	297.1	298.8	299.7	299.9	299.3	299.3	299.1	298.8	298.9	299.1	299.4	299.6	299.8	299.7	299.6	299.7	299.7	299.9	300.3	300.5	300.4	300.1	300.1	300.0	299.8	299.4	299.0	299.0	299.0	299.1	299.1	299.1
294.5	294.3	293.8	293.2	292.2	290.3	289.5	290.3	290.9	291.7	292.1	292.5	292.2	291.5	291.6	292.9	292.5	293.1	296.1	298.3	299.9	299.7	299.4	299.3	299.0	298.8	299.0	299.4	299.7	299.8	299.8	299.7	299.5	299.8	300.1	300.4	300.6	300.5	300.2	300.0	299.9	299.9	299.7	299.2	298.8	298.7	299.0	299.3	299.3	299.4
294.4	294.2	294.0	293.4	292.5	290.9	290.6	291.3	291.3	291.5	291.6	292.1	292.3	292.2	291.9	292.4	293.8	293.8	295.7	298.2	299.6	299.7	299.7	299.3	299.0	299.0	299.5	299.9	300.0	299.9	299.9	299.8	299.7	299.9	300.4	300.6	300.6	300.5	300.3	299.9	299.7	299.7	299.9	299.6	299.3	299.2	299.3	299.5	299.6	299.7
294.4	294.4	294.4	294.0	293.4	292.5	292.6	292.4	292.0	291.6	291.5	291.9	292.0	291.8	291.4	292.6	294.8	294.9	296.4	298.2	300.1	300.1	299.9	299.4	299.3	299.5	300.0	300.2	300.3	300.2	300.1	300.2	300.1	300.2	300.5	300.6	300.5	300.5	300.3	300.0	299.6	299.5	299.6	299.6	299.7	299.6	299.5	299.4	299.3	299.5
294.2	294.5	294.6	294.4	293.8	293.3	293.5	292.9	292.2	291.9	291.8	291.7	291.8	292.1	292.5	293.1	293.2	294.7	297.6	299.8	300.2	300.4	300.1	299.8	299.6	300.0	300.6	300.8	300.8	300.6	300.5	300.6	300.5	300.5	300.4	300.3	300.2	300.1	300.2	300.0	299.6	299.4	299.7	299.7	299.7	299.5	299.6	299.4	299.2	299.6
294.2	294.3	294.5	294.5	294.1	293.1	293.3	292.6	292.0	292.1	292.1	291.7	291.6	293.1	294.0	293.5	293.4	295.6	298.7	300.2	300.5	300.7	300.4	300.2	300.2	300.7	301.0	301.2	301.1	300.9	300.6	300.5	300.5	300.4	300.3	300.3	300.1	299.9	299.9	299.5	299.3	299.3	299.6	299.8	299.4	299.4	299.7	299.6	299.6	300.0
293.9	293.9	294.0	294.4	294.0	292.7	292.0	293.1	292.8	292.7	292.4	291.8	291.6	292.9	294.3	294.7	294.9	296.9	299.0	300.3	300.9	300.9	300.7	300.6	300.7	301.0	301.3	301.4	301.1	300.9	300.6	300.4	300.2	299.9	299.7	299.6	299.7	299.6	299.3	298.9	298.7	299.0	299.5	299.8	299.3	299.4	299.7	299.7	299.9	300.4
293.3	293.5	293.7	293.8	293.5	292.5	291.7	292.0	292.8	292.8	292.8	292.1	292.0	292.7	293.3	293.7	295.6	298.3	299.6	300.5	301.3	301.1	300.9	300.9	301.0	301.3	301.3	300.8	300.5	300.4	300.4	300.5	300.1	299.5	299.0	299.0	299.4	299.4	298.9	298.5	298.5	299.2	299.9	299.9	299.5	299.2	299.4	299.9	300.3	300.6
292.9	293.5	293.7	293.2	292.7	292.6	292.2	292.5	292.4	292.4	292.8	292.6	292.3	292.2	292.1	294.0	297.0	299.3	300.1	300.5	300.9	301.1	301.1	301.1	301.3	301.4	301.0	300.0	299.7	299.8	300.0	300.3	300.2	299.5	298.7	298.8	299.1	299.0	298.8	298.7	299.0	299.4	299.7	299.8	299.4	299.2	299.4	300.0	300.5	300.7
292.8	293.5	293.3	292.6	292.3	292.8	292.7	292.8	292.4	291.9	292.3	292.5	292.4	292.1	292.4	294.9	296.7	297.9	299.5	300.5	301.0	301.2	301.3	301.3	301.4	301.0	300.7	300.1	299.5	299.9	300.2	300.2	300.3	299.6	298.8	298.8	298.9	298.9	298.9	299.0	299.2	299.3	299.5	299.6	299.5	299.4	299.6	300.1	300.5	300.7
292.6	292.7	292.4	292.3	292.5	292.7	292.4	292.1	292.0	292.1	292.4	292.6	292.8	292.7	293.0	294.3	295.0	296.6	299.1	300.1	300.3	301.0	301.4	301.4	301.3	301.0	300.9	300.7	300.3	300.5	300.7	300.5	300.3	299.7	299.5	299.6	299.4	299.0	298.8	299.1	299.4	299.5	299.7	299.6	299.3	299.5	300.0	300.4	300.6	300.8
291.8	291.5	291.6	292.2	292.7	292.7	292.4	292.2	292.3	292.4	292.6	292.9	292.8	293.1	293.0	293.6	294.4	296.6	299.3	300.0	300.5	301.2	301.4	301.4	301.2	301.1	301.1	300.8	300.4	300.4	300.4	300.2	300.0	299.8	300.1	300.3	300.1	299.5	299.0	299.2	299.7	299.9	300.2	299.8	298.9	299.4	300.4	300.8	300.9	301.1
291.3	291.2	291.3	292.0	292.5	292.6	292.6	292.7	292.5	292.5	293.0	293.1	292.7	293.6	293.9	294.4	295.4	297.2	299.0	299.4	300.3	301.3	301.5	301.6	301.3	300.9	300.8	300.8	300.3	300.1	300.1	300.1	300.2	300.1	300.2	300.3	300.2	299.8	299.6	299.7	300.0	300.3	300.5	299.6	298.9	299.9	300.9	301.3	301.3	301.4
291.6	291.7	291.6	292.0	292.3	292.4	292.7	292.5	292.1	292.9	294.0	293.3	292.8	294.7	295.2	295.0	295.9	296.9	297.7	298.2	299.2	300.9	301.3	301.4	301.2	300.7	300.7	300.9	300.6	300.1	300.1	300.3	300.3	300.1	300.0	300.1	300.2	300.2	300.1	300.1	300.2	300.6	300.4	299.0	299.0	300.7	301.4	301.5	301.4	301.3
292.2	292.3	292.1	292.2	292.3	292.4	292.4	292.2	292.4	294.1	294.7	293.5	293.3	295.0	295.3	294.8	295.7	296.1	296.7	297.6	298.4	300.4	300.9	301.2	301.2	300.9	300.9	300.7	300.5	299.9	299.6	299.6	299.3	298.7	299.6	300.0	300.2	300.3	300.2	300.3	300.4	300.7	300.5	298.9	299.4	301.1	301.5	301.3	301.1	300.9
292.2	292.5	292.5	292.5	292.6	292.5	292.6	293.1	294.1	295.0	294.6	293.5	293.4	295.1	295.3	295.0	295.4	295.6	296.7	297.8	298.4	299.8	300.5	301.0	301.1	300.9	300.6	300.1	299.7	299.2	298.9	298.7	296.9	297.1	299.5	300.1	300.4	300.5	300.3	300.4	300.6	300.8	300.5	299.2	300.2	301.3	301.4	301.0	300.8	300.6
292.2	292.6	293.0	293.0	293.1	293.2	293.6	294.5	295.1	294.7	294.4	293.8	292.9	294.2	295.5	295.4	295.4	295.9	296.8	297.2	297.7	298.9	300.6	300.9	300.7	300.3	299.8	299.3	298.9	298.6	298.6	297.4	295.4	296.4	300.1	300.7	300.8	300.7	300.5	300.5	300.7	300.8	300.1	299.3	300.7	301.4	301.2	300.9	300.7	300.3
292.5	292.9	293.3	293.4	293.4	293.6	294.5	295.4	295.5	295.0	295.3	295.2	293.7	294.0	295.1	295.2	295.1	295.5	295.9	296.4	297.5	298.6	300.4	300.7	300.2	299.9	299.4	298.9	298.7	299.0	299.8	299.6	297.1	296.7	298.2	299.5	299.8	300.0	300.2	300.4	300.7	300.4	299.4	299.3	300.7	301.2	301.1	301.0	300.8	300.5
293.2	293.4	293.7	293.7	293.8	294.2	294.8	295.3	295.7	295.9	296.5	296.7	296.2	295.8	295.4	295.1	295.2	295.6	296.3	297.1	298.2	299.9	300.4	300.2	299.8	299.9	299.8	299.7	299.9	301.1	301.3	300.9	298.5	296.7	298.4	299.7	300.0	299.9	300.0	300.1	300.3	299.8	299.4	300.0	300.8	300.9	301.0	301.0	300.9	300.8
294.0	293.9	293.5	293.6	294.4	294.9	294.1	293.5	293.6	294.0	295.2	296.3	296.9	297.1	296.6	296.0	296.2	296.7	297.6	298.6	300.3	300.7	300.4	299.6	299.7	300.1	300.4	301.0	301.2	301.7	301.2	299.1	296.7	296.4	299.0	300.2	300.3	300.0	299.8	299.8	299.8	299.6	300.2	300.9	301.1	300.9	300.8	300.9	300.9	301.0
294.3	294.1	293.7	294.1	294.9	294.9	293.9	292.4	291.5	291.9	293.2	294.4	295.7	296.7	296.7	296.6	297.4	298.4	299.9	300.6	301.4	301.5	300.5	299.6	299.7	300.4	301.2	300.9	300.4	300.3	299.6	297.4	295.8	298.3	299.6	300.6	300.5	300.2	300.2	300.1	300.2	300.5	301.1	301.3	301.2	300.9	300.8	300.9	301.0	301.0
294.1	294.0	294.1	294.4	294.5	294.1	293.6	292.5	291.3	291.1	291.6	292.9	295.0	296.1	296.5	297.4	298.6	300.4	301.0	301.6	301.8	301.5	300.8	300.1	300.0	300.3	300.7	300.0	299.0	298.1	297.1	295.8	295.8	298.8	300.0	300.9	300.9	300.9	300.9	301.0	301.1	301.2	301.3	301.2	301.1	301.0	300.8	300.9	300.8	300.6
293.7	293.6	293.6	293.6	293.4	292.9	292.5	292.0	291.4	291.2	291.6	293.1	295.4	296.5	297.3	298.4	300.2	301.0	301.4	301.6	301.8	301.8	301.5	301.1	300.8	300.5	300.1	298.7	298.0	296.7	295.0	294.6	296.5	299.1	300.2	300.8	300.8	301.2	301.3	301.4	301.4	301.3	301.2	301.0	300.9	300.8	300.7	300.6	300.4	299.9
293.4	293.3	293.2	293.1	292.7	291.9	291.4	291.2	291.2	291.8	292.2	293.2	295.7	297.1	298.2	300.3	300.8	301.0	301.2	301.4	301.7	301.8	301.8	301.7	301.5	301.2	300.8	299.2	298.4	296.2	293.9	294.9	297.1	299.3	300.3	300.9	300.9	300.9	301.0	301.1	301.2	301.0	300.8	300.8	300.8	300.8	300.7	300.3	299.8	299.4
293.2	293.5	293.5	293.0	292.1	291.4	291.3	291.6	291.9	292.5	292.8	293.6	295.7	297.3	299.8	301.0	301.0	300.9	300.9	301.1	301.4	301.5	301.6	301.6	301.5	301.4	301.4	300.5	299.2	296.5	294.7	296.8	298.6	299.3	300.3	300.9	301.1	300.8	300.8	300.7	300.5	300.1	300.3	300.6	300.7	300.7	300.3	299.8	299.3	299.0
292.8	293.4	293.4	292.6	291.8	291.8	292.2	292.6	293.0	293.3	293.8	294.6	295.8	297.2	299.8	300.7	300.8	300.9	300.8	301.0	301.0	301.1	301.2	301.1	301.1	301.4	302.1	301.2	299.8	297.4	297.0	299.4	299.8	299.8	300.3	300.9	301.2	301.1	301.0	300.7	300.0	299.2	300.0	300.7	300.6	300.2	299.7	299.2	299.0	299.0
292.7	292.9	292.8	292.4	292.5	293.1	293.6	293.7	293.6	293.7	294.3	295.1	295.8	296.9	298.0	299.7	300.2	300.4	300.5	300.7	300.6	300.6	300.6	300.5	300.4	302.1	302.5	301.0	299.7	298.1	298.7	300.5	300.3	300.0	300.3	300.7	300.8	300.9	300.8	300.8	300.1	299.3	299.9	300.4	300.1	299.5	298.9	298.7	298.7	298.8
293.7	293.5	293.0	293.0	293.4	293.7	293.7	293.5	293.7	294.2	294.8	295.6	296.2	297.0	297.9	299.0	299.6	299.8	299.8	300.0	299.9	300.0	299.9	300.0	299.8	301.8	301.9	299.9	298.4	297.9	299.6	300.2	300.1	300.1	300.0	300.2	300.3	300.5	300.5	300.5	300.1	299.5	299.6	299.5	299.3	298.9	298.5	298.4	298.5	298.6
294.6	294.3	294.2	294.3	294.0	293.2	292.5	292.7	294.0	294.9	295.7	296.5	297.0	297.3	297.8	298.7	299.1	299.0	299.0	299.1	299.2	299.3	299.4	299.5	299.6	300.5	302.1	300.5	298.3	297.9	299.9	300.1	300.0	299.7	299.6	299.9	300.0	300.0	300.0	299.9	299.4	298.9	298.5	298.4	298.5	298.5	298.4	298.3	298.2	298.2
294.6	294.6	295.1	295.3	294.3	293.1	292.6	292.9	294.1	295.3	296.2	297.1	297.7	298.0	298.1	298.5	298.6	298.6	298.5	298.5	298.5	298.6	298.9	299.0	299.4	300.7	303.1	302.0	299.6	298.5	299.2	299.3	299.5	299.2	299.1	299.3	299.2	299.2	299.3	299.1	298.6	298.2	297.9	297.8	298.0	298.1	298.1	297.9	297.8	297.8
294.5	294.4	295.0	295.3	294.7	294.0	293.2	292.4	293.0	294.8	296.4	297.4	298.0	298.3	298.1	298.4	298.5	298.4	298.3	298.1	298.1	298.1	298.3	298.6	298.7	299.4	303.0	303.2	301.4	300.3	298.8	299.1	299.1	298.8	298.7	298.7	298.6	298.5	298.5	298.3	298.1	297.9	297.6	297.6	297.6	297.7	297.6	297.5	297.4	297.3
295.0	294.4	294.2	294.2	293.8	292.9	291.7	290.3	291.1	294.6	296.6	297.1	297.8	298.1	298.4	298.5	298.6	298.5	298.3	298.1	297.9	297.8	297.7	298.0	298.1	298.3	299.0	299.7	299.1	299.3	299.2	299.2	298.7	298.4	298.4	298.6	298.5	298.2	298.2	298.0	297.7	297.5	297.3	297.4	297.4	297.4	297.2	296.9	296.8	296.8
295.6	294.7	293.7	293.1	292.0	290.8	289.9	289.1	290.5	294.4	296.6	297.2	297.9	298.4	298.7	298.8	298.8	298.7	298.4	298.2	297.9	297.5	297.3	297.5	297.7	297.8	298.2	298.6	299.0	299.2	299.2	298.9	298.3	298.1	298.1	298.3	298.1	297.7	297.7	297.6	297.4	297.3	297.3	297.3	297.2	297.0	296.6	296.2	296.2	296.0
296.4	296.0	294.7	293.5	291.7	290.3	289.3	289.1	290.8	294.3	296.5	297.1	298.0	298.6	298.8	298.9	298.7	298.4	298.2	298.0	297.7	297.3	297.1	297.3	297.4	297.6	298.2	298.7	298.8	298.7	298.5	298.2	297.8	297.7	297.9	298.1	297.9	297.4	297.1	296.8	297.0	297.2	297.2	297.1	296.8	296.3	295.8	295.6	295.4	295.2
298.2	297.5	295.9	294.2	291.9	290.3	289.9	290.4	291.7	294.2	296.5	297.2	298.0	298.5	298.5	298.4	298.1	297.7	297.6	297.4	297.5	297.4	297.4	297.5	297.7	298.0	298.2	298.4	298.2	298.0	297.8	297.5	297.2	297.1	297.2	297.2	297.2	297.0	296.6	296.6	296.9	297.0	296.9	296.6	296.1	295.6	295.0	294.7	294.7	294.5
299.6	298.0	295.8	294.1	292.3	290.5	290.9	292.2	292.9	294.8	296.4	297.4	298.1	298.1	298.0	297.8	297.7	297.5	297.4	297.4	297.5	297.5	297.5	297.7	298.0	298.1	297.8	297.8	297.8	297.5	297.4	297.2	296.8	296.8	296.9	296.8	296.7	296.4	296.5	296.7	296.8	296.6	296.3	295.8	295.3	294.7	294.3	294.0	294.1	294.0
300.7	298.2	295.6	293.8	292.0	290.1	290.6	292.6	294.0	295.8	296.8	297.5	297.8	297.6	297.4	297.5	297.6	297.5	297.3	297.2	297.2	297.1	297.2	297.6	297.8	297.4	296.8	296.9	296.8	296.8	297.0	296.8	296.5	296.5	296.6	296.5	296.3	296.3	296.5	296.6	296.5	296.2	295.7	295.1	294.5	294.1	293.7	293.6	293.6	293.6
300.8	298.3	296.0	293.9	292.0	291.4	292.0	293.3	295.0	296.1	297.1	297.5	297.5	297.2	297.1	297.2	297.2	297.1	296.9	296.7	296.7	296.9	296.9	297.1	297.0	296.4	296.1	296.0	295.8	295.8	296.0	296.1	296.1	296.2	296.3	296.2	296.1	296.1	296.1	296.2	296.1	295.8	295.4	294.8	294.2	293.8	293.4	293.2	293.1	293.1
300.3	298.1	296.0	294.3	292.9	293.4	294.3	294.5	295.2	296.5	297.1	297.2	297.3	297.0	296.7	296.7	296.7	296.7	296.7	296.6	296.7	296.7	296.7	296.6	296.2	295.8	295.5	295.4	295.3	295.3	295.6	295.8	295.8	295.9	296.0	295.8	295.7	295.6	295.5	295.4	295.3	295.3	295.1	294.5	294.1	293.6	293.2	292.9	292.8	292.8
299.0	298.1	296.3	294.9	294.3	294.6	295.1	296.1	296.2	296.5	296.9	296.9	296.9	296.7	296.5	296.5	296.5	296.5	296.5	296.4	296.4	296.4	296.3	296.0	295.7	295.3	294.9	294.9	294.9	295.0	295.2	295.4	295.6	295.7	295.5	295.2	294.9	294.9	294.7	294.5	294.5	294.6	294.6	294.2	293.9	293.5	293.1	292.8	292.7	292.7
297.4	297.8	296.9	296.0	296.0	295.8	296.0	296.2	296.2	296.1	296.4	296.4	296.4	296.4	296.4	296.3	296.3	296.3	296.2	296.0	295.8	295.8	295.7	295.4	295.1	294.7	294.5	294.4	294.4	294.5	294.7	294.8	295.0	295.0	294.7	294.4	294.2	294.1	294.0	293.8	293.9	293.9	294.0	293.9	293.6	293.3	292.9	292.7	292.7	292.7
296.1	297.1	297.5	297.6	297.2	296.6	296.3	296.1	295.9	295.7	295.6	295.7	295.7	295.8	295.9	295.8	295.9	295.9	295.7	295.5	295.3	295.3	295.2	295.0	294.7	294.4	294.2	294.0	294.0	294.2	294.3	294.3	294.3	294.4	294.2	294.0	293.7	293.5	293.4	293.4	293.4	293.4	293.4	293.5	293.3	292.9	292.5	292.3	292.4	292.6
295.9	296.3	297.2	296.7	296.8	296.4	296.0	295.6	295.4	295.2	295.0	294.8	294.9	295.1	295.3	295.4	295.4	295.4	295.3	295.0	294.9	294.9	294.8	294.6	294.4	294.1	294.0	293.8	293.9	294.0	294.1	294.0	294.0	294.1	294.1	293.9	293.4	293.1	293.1	293.1	293.1	293.0	293.0	293.1	293.0	292.5	292.1	292.0	292.0	292.2
295.5	295.4	295.8	296.2	296.1	295.7	295.4	295.1	295.0	294.8	294.6	294.4	294.4	294.6	294.9	295.1	295.0	295.0	294.8	294.6	294.5	294.5	294.5	294.3	294.0	293.8	293.7	293.7	293.7	293.7	293.8	293.7	293.7	293.7	293.6	293.5	293.1	292.9	292.9	292.9	292.9	292.8	292.9	292.8	292.6	292.0	291.6	291.5	291.6	291.7
296.0	296.0	295.9	295.7	295.5	295.3	295.1	294.9	294.8	294.6	294.4	294.2	294.0	294.1	294.3	294.5	294.5	294.4	294.3	294.3	294.3	294.3	294.3	294.0	293.7	293.5	293.4	293.4	293.4	293.3	293.2	293.1	293.0	292.9	292.9	292.8	292.7	292.6	292.5	292.7	292.8	292.8	292.8	292.7	292.2	291.7	291.3	291.2	291.1	291.1
295.8	295.7	295.5	295.5	295.4	295.3	295.1	294.8	294.7	294.4	294.2	293.9	293.7	293.6	293.6	293.8	293.8	293.8	293.8	293.9	293.9	294.0	294.0	293.7	293.4	293.2	293.1	293.2	293.2	293.0	292.8	292.6	292.5	292.4	292.3	292.3	292.2	292.1	292.1	292.3	292.5	292.6	292.7	292.5	292.1	291.5	291.0	290.9	290.8	290.6
294.9	295.0	295.1	295.2	295.2	295.2	294.9	294.7	294.7	294.4	294.0	293.7	293.4	293.2	293.2	293.4	293.4	293.3	293.4	293.4	293.4	293.5	293.4	293.2	293.0	292.9	292.9	292.9	292.9	292.7	292.5	292.3	292.1	291.8	291.8	291.8	291.8	291.7	291.7	291.9	292.1	292.4	292.4	292.3	291.9	291.4	291.0	290.8	290.6	290.3
293.5	293.5	293.7	294.2	294.7	294.9	294.8	294.5	294.3	294.2	293.8	293.4	293.1	293.0	293.1	293.2	293.2	293.0	292.9	292.8	292.9	293.0	292.9	292.8	292.7	292.5	292.5	292.4	292.4	292.2	292.2	292.1	291.8	291.5	291.4	291.5	291.5	291.3	291.3	291.4	291.5	291.8	291.9	291.8	291.6	291.2	291.0	290.7	290.3	290.0
292.6	292.5	292.8	293.4	294.0	294.3	294.1	293.5	293.6	293.7	293.3	292.8	292.6	292.6	292.7	292.9	293.0	292.9	292.5	292.1	292.3	292.5	292.6	292.5	292.4	292.3	292.2	292.1	292.0	291.6	291.6	291.8	291.7	291.4	291.3	291.3	291.3	291.1	291.1	291.0	291.0	291.1	291.2	291.2	291.2	290.9	290.7	290.5	290.1	289.7
292.0	292.0	292.0	292.3	292.9	293.1	292.8	292.5	293.0	293.2	292.8	292.3	292.0	291.9	292.0	292.2	292.3	292.1	291.7	291.2	291.6	292.1	292.3	292.3	292.3	292.2	292.1	291.9	291.7	291.2	291.1	291.5	291.6	291.4	291.2	291.1	291.0	290.9	290.9	290.9	290.8	290.9	290.9	290.8	290.6	290.5	290.3	290.1	289.7	289.2
291.2	291.4	291.5	291.3	291.2	291.2	291.3	291.4	291.9	292.0	291.9	291.5	291.2	291.0	291.1	291.3	291.3	290.9	290.4	290.3	290.6	291.0	291.2	291.3	291.3	291.3	291.3	291.3	291.0	290.7	290.6	290.9	291.2	291.3	291.2	291.0	291.0	290.8	290.7	290.6	290.6	290.6	290.6	290.6	290.3	290.1	289.8	289.6	289.4	289.0
290.4	290.6	290.7	290.4	290.0	289.8	290.0	290.4	290.6	290.4	290.3	290.2	290.2	290.3	290.3	290.2	289.7	289.1	288.9	288.9	289.1	289.2	289.3	289.4	289.5	289.7	290.0	290.4	290.3	290.0	289.9	290.0	290.3	290.3	290.2	290.2	290.4	290.1	289.8	289.7	289.7	290.0	290.3	290.4	290.1	289.8	289.5	289.3	289.1	288.8
289.9	289.9	289.8	289.6	289.2	289.0	288.9	289.1	289.2	289.0	288.7	288.7	288.8	289.0	288.9	288.4	287.8	287.3	287.2	287.3	287.4	287.3	287.2	287.3	287.7	288.2	288.5	288.3	288.6	288.8	288.6	288.4	288.4	287.8	287.7	288.3	288.9	288.6	288.3	288.3	288.3	288.8	289.6	290.0	289.9	289.6	289.2	288.9	288.9	288.7
288.8	288.7	288.7	288.7	288.6	288.3	288.0	287.9	288.0	288.0	287.6	287.2	287.1	287.1	286.9	286.5	285.8	285.2	285.0	285.2	285.4	285.5	285.4	285.4	285.9	286.3	286.1	285.1	285.1	285.6	285.7	285.8	286.0	285.5	285.6	286.5	287.0	287.0	287.2	287.8	287.6	287.8	288.4	289.2	289.5	289.1	288.3	288.0	288.1	288.3
287.9	287.6	287.6	287.6	287.8	287.6	287.1	286.6	286.7	287.1	286.8	286.1	285.5	285.2	284.8	284.4	283.7	283.0	282.7	282.8	283.1	283.3	283.4	283.5	283.7	283.8	283.4	282.6	282.5	282.7	282.9	283.0	283.2	283.1	283.6	284.2	284.7	285.0	285.7	286.9	287.1	286.9	287.2	287.9	288.6	288.3	287.5	286.9	287.0	287.5
287.3	287.2	287.1	286.7	286.6	286.3	285.8	285.6	286.0	286.4	286.0	285.1	284.3	283.8	283.4	282.8	281.9	281.2	280.8	280.8	281.0	281.2	281.3	281.5	281.6	281.5	281.3	281.1	281.0	281.2	281.3	281.5	281.6	281.7	281.9	282.2	282.6	283.1	283.9	284.7	285.3	285.7	286.4	287.4	288.0	288.0	287.2	286.4	286.4	286.9
286.6	286.5	286.3	285.8	285.3	284.9	284.8	285.0	285.4	285.5	285.2	284.4	283.6	283.1	282.5	281.8	280.8	279.9	279.6	279.5	279.5	279.6	279.6	279.7	279.7	279.7	279.7	279.7	279.8	280.0	280.2	280.5	280.7	280.8	280.9	281.0	281.2	281.6	282.1	282.7	283.3	284.0	285.3	286.8	287.6	287.7	286.9	285.9	286.2	286.7
285.7	285.4	285.2	285.1	284.7	284.4	284.4	284.6	284.6	284.3	284.0	283.7	283.3	282.8	282.2	281.4	280.4	279.5	279.0	278.8	278.7	278.7	278.6	278.6	278.5	278.4	278.4	278.4	278.6	278.8	279.1	279.5	279.8	279.9	280.0	280.1	280.2	280.5	280.8	281.3	281.8	282.5	283.5	285.2	286.3	286.6	286.0	285.0	285.4	285.9
284.7	284.4	284.4	284.5	284.4	284.1	284.1	284.2	284.2	283.7	283.4	283.2	283.1	282.8	282.3	281.5	280.7	279.7	279.0	278.6	278.4	278.3	278.2	278.1	277.8	277.6	277.5	277.5	277.5	277.7	277.9	278.2	278.7	279.0	279.3	279.5	279.7	279.8	279.9	280.2	280.8	281.3	282.0	282.9	283.8	284.4	284.4	284.1	284.2	284.5
283.8	283.7	283.8	284.0	284.0	283.7	283.6	283.6	283.7	283.4	283.1	282.9	282.9	282.8	282.3	281.8	281.0	280.3	279.5	278.9	278.5	278.2	278.0	277.8	277.6	277.4	277.2	277.0	276.8	276.7	276.8	277.0	277.3	277.8	278.2	278.7	279.0	279.2	279.3	279.5	280.0	280.4	280.7	281.2	281.8	282.3	282.6	282.9	283.2	283.5
282.7	282.8	283.1	283.3	283.4	283.4	283.4	283.4	283.3	283.0	282.7	282.5	282.4	282.3	281.9	281.4	280.9	280.4	279.8	279.2	278.8	278.4	278.1	277.8	277.6	277.4	277.2	277.0	276.7	276.5	276.3	276.3	276.4	276.7	277.1	277.5	277.9	278.2	278.5	278.7	279.0	279.3	279.5	279.9	280.3	280.5	280.7	281.2	281.7	282.2
281.2	281.4	281.7	282.1	282.5	282.9	283.2	283.4	283.3	283.1	282.8	282.4	282.0	281.6	281.2	280.9	280.6	280.3	279.8	279.3	278.9	278.5	278.2	278.0	277.8	277.6	277.4	277.2	277.0	276.8	276.6	276.4	276.3	276.3	276.4	276.7	277.0	277.2	277.4	277.7	278.1	278.4	278.7	278.9	279.1	279.1	279.3	279.6	279.9	280.2
279.6	279.8	280.1	280.4	281.0	281.4	281.9	282.2	282.5	282.7	282.5	282.0	281.4	281.1	281.0	280.9	280.6	280.3	279.8	279.4	279.1	278.8	278.5	278.2	278.1	278.0	277.8	277.6	277.4	277.3	277.1	277.0	276.8	276.7	276.5	276.5	276.6	276.7	276.8	276.9	277.2	277.5	277.9	278.1	278.2	278.3	278.5	278.7	278.8	279.0
278.8	278.9	279.0	279.1	279.5	279.7	279.9	280.2	280.8	281.3	281.4	281.2	281.0	280.9	280.9	280.9	280.6	280.2	279.9	279.5	279.2	279.0	278.7	278.5	278.4	278.3	278.2	278.0	277.8	277.6	277.5	277.5	277.3	277.1	276.9	276.7	276.6	276.6	276.5	276.5	276.7	276.8	277.0	277.1	277.3	277.5	277.8	277.9	278.1	278.2
278.3	278.3	278.2	278.2	278.4	278.5	278.6	278.9	279.6	280.0	280.1	280.1	280.1	280.1	280.2	280.3	280.2	280.0	279.8	279.5	279.2	278.9	278.6	278.4	278.4	278.4	278.2	278.0	277.7	277.6	277.5	277.5	277.4	277.2	277.1	276.9	276.8	276.7	276.6	276.5	276.5	276.5	276.5	276.6	276.6	276.8	277.0	277.2	277.4	277.6
277.4	277.5	277.6	277.7	277.9	278.0	278.3	278.6	279.1	279.2	279.2	279.2	279.3	279.5	279.6	279.7	279.8	279.7	279.4	279.1	278.8	278.5	278.2	278.1	278.1	278.0	277.9	277.7	277.5	277.4	277.3	277.3	277.2	277.1	277.0	276.8	276.7	276.5	276.4	276.4	276.4	276.4	276.3	276.3	276.2	276.3	276.4	276.5	276.7	276.9
276.1	276.4	276.6	276.9	277.3	277.6	278.0	278.3	278.6	278.8	278.8	278.8	278.8	278.9	279.0	279.2	279.2	279.2	279.0	278.8	278.4	278.1	277.8	277.5	277.4	277.3	277.2	277.1	277.0	276.9	276.8	276.7	276.8	276.7	276.7	276.5	276.3	276.2	276.1	276.1	276.1	276.0	276.0	275.9	275.9	275.9	276.0	276.1	276.2	276.4
274.5	274.8	275.2	275.7	276.2	276.7	277.1	277.5	277.8	278.0	278.2	278.3	278.3	278.4	278.5	278.7	278.7	278.7	278.7	278.5	278.2	277.8	277.4	277.1	276.8	276.6	276.4	276.3	276.3	276.2	276.2	276.2	276.2	276.2	276.2	276.1	275.9	275.8	275.8	275.7	275.7	275.7	275.7	275.6	275.6	275.6	275.7	275.7	275.9	276.0
273.5	273.8	274.1	274.6	275.1	275.6	276.0	276.3	276.6	277.0	277.3	277.6	277.7	277.8	278.0	278.1	278.2	278.3	278.3	278.2	278.0	277.6	277.2	276.7	276.3	275.9	275.6	275.5	275.4	275.4	275.5	275.5	275.6	275.6	275.5	275.5	275.4	275.4	275.4	275.4	275.4	275.4	275.4	275.4	275.4	275.4	275.4	275.5	275.6	275.7
272.8	273.1	273.5	273.9	274.3	274.7	275.0	275.3	275.6	275.9	276.3	276.6	276.9	277.1	277.3	277.5	277.6	277.8	277.8	277.8	277.6	277.4	276.9	276.3	275.6	275.1	274.8	274.6	274.6	274.6	274.7	274.8	274.9	275.0	275.0	275.0	275.0	275.0	275.1	275.1	275.2	275.2	275.3	275.2	275.2	275.2	275.2	275.2	275.3	275.5
272.1	272.5	272.8	273.2	273.6	273.9	274.3	274.6	274.9	275.2	275.5	275.7	275.9	276.2	276.4	276.7	277.0	277.2	277.3	277.3	277.2	276.9	276.2	275.5	274.8	274.5	274.2	274.2	274.1	274.2	274.2	274.3	274.5	274.6	274.7	274.8	274.8	274.9	274.9	275.0	275.1	275.1	275.2	275.2	275.1	275.0	275.0	275.0	275.0	275.3
271.8	272.1	272.3	272.6	272.8	273.1	273.4	273.8	274.1	274.4	274.6	274.9	275.1	275.3	275.6	275.8	276.1	276.4	276.6	276.5	276.3	275.8	275.1	274.6	274.2	274.1	274.0	274.0	274.0	274.0	274.1	274.2	274.4	274.6	274.6	274.7	274.8	274.9	274.9	275.0	275.1	275.1	275.1	275.1	275.0	274.9	274.8	274.8	274.8	275.0
271.8	272.0	272.2	272.3	272.4	272.6	272.8	273.1	273.3	273.6	273.9	274.2	274.4	274.6	274.7	274.9	275.1	275.2	275.3	275.2	274.9	274.5	274.2	274.0	273.9	273.9	273.9	274.0	274.0	274.0	274.1	274.3	274.5	274.6	274.7	274.7	274.8	274.9	274.9	275.0	275.0	275.0	275.0	275.0	274.9	274.8	274.7	274.6	274.6	274.8
271.9	272.0	272.1	272.2	272.3	272.4	272.5	272.7	272.8	273.1	273.4	273.7	273.8	274.0	274.1	274.2	274.2	274.2	274.2	274.1	274.0	273.9	273.8	273.8	273.8	273.9	273.9	273.9	274.0	274.1	274.2	274.4	274.5	274.6	274.7	274.7	274.8	274.8	274.8	274.8	274.8	274.8	274.7	274.6	274.5	274.5	274.4	274.3	274.4	274.5
271.9	272.0	272.1	272.2	272.3	272.4	272.5	272.6	272.7	272.8	273.0	273.2	273.4	273.6	273.7	273.7	273.7	273.6	273.6	273.6	273.7	273.7	273.7	273.7	273.7	273.8	273.9	274.0	274.1	274.2	274.3	274.4	274.5	274.5	274.6	274.6	274.6	274.5	274.5	274.4	274.4	274.3	274.3	274.2	274.1	274.0	274.0	274.0	274.0	274.1
272.1	272.1	272.2	272.3	272.5	272.6	272.7	272.7	272.7	272.7	272.8	272.9	273.0	273.2	273.3	273.4	273.4	273.4	273.4	273.4	273.5	273.5	273.6	273.6	273.7	273.8	274.0	274.2	274.3	274.3	274.3	274.3	274.4	274.4	274.4	274.4	274.3	274.2	274.1	274.1	274.0	274.0	273.9	273.9	273.8	273.7	273.8	273.8	273.8	273.9
272.4	272.5	272.5	272.5	272.6	272.7	272.8	272.8	272.8	272.8	272.7	272.7	272.7	272.8	273.0	273.1	273.1	273.2	273.3	273.3	273.4	273.4	273.5	273.5	273.6	273.8	273.9	274.1	274.2	274.2	274.1	274.1	274.2	274.2	274.1	274.1	274.0	273.9	273.9	273.8	273.8	273.8	273.7	273.7	273.6	273.6	273.6	273.7	273.7	273.7
272.6	272.7	272.7	272.7	272.7	272.8	272.8	272.7	272.7	272.7	272.7	272.7	272.7	272.7	272.8	272.9	273.0	273.1	273.2	273.2	273.3	273.4	273.5	273.6	273.7	273.7	273.8	273.8	273.8	273.8	273.9	273.9	274.0	274.0	273.9	273.9	273.8	273.8	273.7	273.7	273.7	273.6	273.6	273.5	273.5	273.4	273.4	273.5	273.5	273.5
272.4	272.4	272.5	272.5	272.6	272.6	272.5	272.5	272.5	272.6	272.6	272.6	272.7	272.8	272.8	272.9	272.9	273.0	273.0	273.1	273.1	273.2	273.2	273.3	273.4	273.4	273.5	273.5	273.6	273.6	273.6	273.7	273.7	273.7	273.7	273.7	273.7	273.6	273.6	273.6	273.6	273.5	273.5	273.5	273.4	273.4	273.4	273.3	273.4	273.4
272.3	272.3	272.4	272.4	272.5	272.4	272.4	272.3	272.3	272.3	272.4	272.5	272.6	272.6	272.7	272.8	272.8	272.9	272.9	273.0	273.0	273.0	273.0	273.1	273.2	273.2	273.3	273.3	273.4	273.4	273.5	273.5	273.5	273.6	273.6	273.6	273.5	273.5	273.5	273.5	273.5	273.4	273.4	273.3	273.3	273.3	273.3	273.3	273.3	273.3
272.4	272.4	272.4	272.5	272.4	272.3	272.2	272.2	272.1	272.1	272.2	272.3	272.4	272.5	272.6	272.7	272.8	272.8	272.9	273.0	273.0	273.0	273.0	273.0	273.0	273.1	273.2	273.2	273.3	273.3	273.3	273.4	273.4	273.4	273.4	273.5	273.5	273.5	273.5	273.4	273.4	273.3	273.3	273.3	273.2	273.2	273.2	273.2	273.2	273.2
272.3	272.3	272.3	272.4	272.3	272.3	272.2	272.1	272.1	272.1	272.2	272.2	272.3	272.4	272.5	272.7	272.8	272.9	272.9	273.0	273.0	273.0	273.0	273.0	273.0	273.0	273.1	273.2	273.2	273.3	273.3	273.3	273.3	273.3	273.3	273.4	273.4	273.4	273.3	273.3	273.2	273.1	273.0	273.0	273.0	272.9	272.9	272.9	272.9	272.9
272.2	272.2	272.2	272.3	272.3	272.3	272.2	272.2	272.2	272.2	272.3	272.3	272.4	272.5	272.6	272.7	272.8	272.9	272.9	272.9	272.9	272.9	272.9	272.9	273.0	273.0	273.1	273.1	273.1	273.2	273.2	273.1	273.1	273.1	273.0	273.0	273.0	272.9	272.9	272.8	272.8	272.7	272.7	272.6	272.5	272.5	272.4	272.4	272.4	272.4
272.2	272.2	272.2	272.3	272.3	272.3	272.3	272.3	272.3	272.3	272.4	272.4	272.5	272.5	272.6	272.7	272.7	272.8	272.8	272.8	272.8	272.8	272.8	272.9	272.9	273.0	273.0	273.0	272.9	272.9	272.8	272.8	272.7	272.7	272.6	272.6	272.6	272.5	272.5	272.4	272.3	272.2	272.4	272.5	272.5	272.5	272.5	272.5	272.5	272.5
272.2	272.3	272.3	272.3	272.3	272.4	272.3	272.3	272.3	272.3	272.4	272.4	272.5	272.5	272.5	272.6	272.6	272.7	272.7	272.7	272.7	272.7	272.7	272.7	272.7	272.8	272.7	272.6	272.6	272.5	272.5	272.5	272.4	272.4	272.4	272.3	272.1	272.0	271.8	271.7	271.7	271.8	272.2	272.5	272.7	272.9	272.9	273.0	272.9	272.9
272.2	272.3	272.3	272.3	272.3	272.3	272.3	272.3	272.3	272.3	272.4	272.4	272.4	272.4	272.4	272.4	272.4	272.4	272.4	272.4	272.4	272.5	272.5	272.5	272.4	272.4	272.5	272.5	272.6	272.7	272.9	273.0	273.0	273.0	272.8	272.3	271.2	269.7	268.7	268.1	268.3	269.3	271.6	272.1	272.4	272.7	272.9	272.9	272.9	272.9
272.3	272.3	272.4	272.4	272.5	272.6	272.7	272.8	272.9	273.0	273.1	273.1	273.1	272.9	272.8	272.6	272.4	272.3	272.3	272.4	272.4	272.6	272.7	272.8	272.8	272.8	272.9	273.0	273.2	273.3	273.6	273.8	273.8	273.5	271.9	270.8	269.7	267.8	266.1	265.8	266.1	267.5	269.1	271.5	272.0	272.2	272.5	272.6	272.6	272.6
272.9	273.0	273.1	273.1	273.2	273.3	273.4	273.5	273.5	273.6	273.6	273.6	273.5	273.4	273.3	273.1	273.0	273.0	273.0	273.2	273.3	273.4	273.5	273.4	273.2	272.9	272.7	272.4	272.6	272.1	272.1	272.1	271.5	270.3	269.0	267.4	266.2	264.8	263.4	263.8	264.3	265.4	266.9	267.8	268.0	268.3	268.9	269.4	269.7	270.0
273.5	273.5	273.5	273.6	273.6	273.5	273.5	273.5	273.4	273.4	273.2	273.1	273.0	273.0	273.0	273.1	273.3	273.4	273.6	273.6	273.6	273.5	273.3	272.6	270.1	269.0	268.0	267.0	267.4	267.7	267.9	268.0	267.5	266.5	265.3	263.7	262.3	261.6	260.9	261.4	261.9	262.5	263.0	263.4	263.5	263.8	264.3	264.8	265.1	265.4
273.5	273.5	273.5	273.5	273.5	273.4	273.4	273.4	273.3	273.0	272.7	272.5	271.8	271.8	272.0	272.5	273.0	273.5	273.5	273.2	271.9	269.9	269.4	268.0	266.2	264.6	263.6	262.5	262.4	262.2	262.4	262.7	262.8	262.3	261.7	260.7	259.6	258.9	258.5	258.3	258.5	258.7	258.8	258.8	258.9	259.1	259.3	259.7	260.1	260.5
273.5	273.6	273.6	273.7	273.7	273.7	273.7	273.7	272.8	272.6	272.1	271.3	270.5	270.3	270.1	270.2	270.9	271.6	272.2	272.1	270.5	268.6	266.8	264.9	262.9	261.3	260.3	259.2	259.0	258.8	258.7	258.9	259.1	258.8	258.5	258.0	257.3	256.7	256.2	255.8	255.6	255.5	255.3	255.4	255.5	255.8	256.2	256.6	257.2	257.9
[truncated: 150 more columns]
