# Supplementary material for: Temperature Field Data Reconstruction Using the Sparse Low-Rank Matrix Completion Method
Source: Hindawi journal article supplement (doi:10.1155/2019/3676182), 2019-11-03
Supplement: f1 [file 3676182.f1.zip › data/ERA Interim/t2m-2014010112.txt]

263.1	263.0	262.6	262.4	261.9	261.5	261.0	260.6	260.0	259.4	258.8	258.2	257.8	257.6	257.4	257.2	256.9	256.7	256.5	256.3	256.5	256.5	256.4	256.3	255.9	255.5	255.0	254.4	253.7	252.9	252.0	251.0	250.3	249.6	248.9	248.4	247.9	247.4	246.9	246.6	246.5	246.4	246.3	246.3	246.3	246.4	246.4	246.4	246.4	246.3
263.7	263.2	262.7	262.2	261.7	261.2	260.8	260.3	259.8	259.4	258.9	258.4	258.6	258.7	258.9	259.1	258.9	258.7	258.5	258.4	259.2	259.9	260.7	261.5	261.1	260.6	260.2	259.8	258.4	257.0	255.6	254.3	253.2	252.2	251.2	250.1	249.7	249.2	248.8	248.3	248.6	248.9	249.2	249.5	250.0	250.5	250.9	251.4	251.7	252.0
265.2	264.9	264.5	263.9	263.5	263.0	262.5	262.0	261.5	261.1	260.6	260.2	260.6	261.1	261.6	262.2	262.5	262.7	263.1	263.4	263.5	263.6	263.7	263.7	263.7	263.6	263.4	263.3	263.0	262.7	262.3	261.9	260.5	259.2	257.8	256.4	256.1	255.9	255.7	255.5	255.6	255.6	255.6	255.7	256.5	257.5	258.4	259.4	259.7	260.0
268.8	268.6	268.5	268.3	268.1	267.9	267.6	267.3	267.0	266.7	266.4	266.2	265.9	265.6	265.5	265.4	265.3	265.2	265.3	265.3	265.3	265.3	265.3	265.4	265.3	265.3	265.1	265.0	264.8	264.5	264.2	264.0	263.7	263.5	263.2	263.0	262.8	262.6	262.5	262.4	262.3	262.3	262.2	262.1	262.1	262.2	262.3	262.3	262.4	262.5
269.4	269.2	269.1	268.9	268.7	268.6	268.4	268.3	268.2	268.1	268.0	267.8	267.6	267.5	267.4	267.3	267.2	267.2	267.1	267.0	266.9	266.8	266.8	266.7	266.6	266.4	266.2	266.1	265.8	265.6	265.3	265.1	265.0	264.9	264.7	264.6	264.4	264.2	264.1	264.1	264.0	264.0	263.8	263.8	263.5	263.1	262.6	262.1	262.0	261.9
270.0	269.9	269.8	269.7	269.6	269.5	269.5	269.4	269.4	269.3	269.3	269.2	269.0	268.9	268.7	268.6	268.5	268.4	268.2	268.1	267.9	267.8	267.7	267.6	267.5	267.3	267.1	266.9	266.7	266.5	266.4	266.2	266.1	266.0	265.9	265.8	265.6	265.5	265.3	265.1	265.0	264.4	263.7	263.0	262.4	261.9	258.5	258.0	256.5	255.4
271.1	271.0	270.9	270.8	270.7	270.6	270.5	270.3	270.2	270.0	269.8	269.7	269.5	269.4	269.3	269.2	269.0	268.8	268.5	268.4	268.3	268.2	268.2	268.1	268.0	267.8	267.6	267.5	267.4	267.3	267.3	267.3	267.1	266.9	266.7	266.6	266.6	266.6	266.0	265.1	264.1	263.3	262.5	256.9	256.2	255.7	255.2	254.9	252.1	251.0
272.2	272.0	271.9	271.7	271.5	271.3	271.0	270.8	270.6	270.4	270.2	270.0	269.8	269.6	269.4	269.2	268.9	268.7	268.4	268.4	268.4	268.4	268.3	268.2	268.1	268.0	267.8	267.7	267.6	267.5	267.5	267.3	267.1	266.9	266.7	266.7	266.6	265.6	264.3	262.8	262.1	255.8	255.0	254.7	254.4	250.7	250.1	249.5	249.0	248.5
272.9	272.7	272.5	272.3	272.0	271.7	271.4	271.3	271.1	271.0	270.7	270.4	270.2	269.8	269.5	269.2	269.1	268.9	268.8	268.7	268.5	268.4	268.3	268.2	268.0	268.0	267.9	267.8	267.6	267.5	267.3	267.2	267.1	267.0	266.3	265.6	264.9	263.7	261.5	257.2	250.1	249.7	249.3	249.3	249.1	249.0	248.2	247.5	246.7	246.1
273.7	273.5	273.3	273.0	272.7	272.4	272.3	272.1	272.1	272.0	271.8	271.5	271.3	271.0	270.7	270.5	270.2	270.0	269.8	269.5	269.3	269.0	268.8	268.5	268.3	268.0	267.8	267.7	267.6	267.5	267.5	267.4	267.0	266.6	265.6	263.7	261.7	260.3	251.5	250.4	250.1	249.4	248.9	248.7	248.4	247.7	246.6	245.5	245.0	244.6
273.7	273.6	273.5	273.4	273.3	273.2	273.2	273.1	273.0	272.8	272.6	272.4	272.1	271.9	271.6	271.3	271.0	270.7	270.5	270.2	270.0	269.7	269.4	269.0	268.6	268.2	267.9	267.8	267.7	267.5	267.4	267.2	266.0	264.8	263.7	261.8	251.0	250.1	249.4	248.8	248.7	248.3	247.4	247.0	246.7	246.2	245.6	245.0	245.1	245.2
272.0	271.8	271.8	271.8	271.9	272.0	272.1	272.2	272.4	272.5	272.6	272.5	272.4	272.2	271.9	271.6	271.4	271.2	271.0	270.6	270.3	270.0	269.8	269.6	269.4	269.1	268.8	268.3	267.9	267.4	266.9	266.4	265.5	264.7	263.4	261.2	259.0	257.5	247.2	245.9	244.6	243.3	242.6	245.6	246.1	246.2	246.4	246.5	246.5	246.4
267.3	267.0	266.6	265.6	264.5	264.1	264.3	264.4	269.7	271.2	271.7	272.0	272.3	272.0	271.7	271.5	271.3	271.2	270.9	270.5	270.3	270.1	269.8	269.6	269.4	269.1	268.6	268.1	267.8	267.5	267.0	266.3	265.6	264.7	263.7	262.6	261.2	259.9	258.0	256.2	254.5	252.8	251.2	250.6	250.0	249.4	248.7	248.0	247.5	247.0
265.2	264.6	264.1	263.7	263.2	263.1	263.2	262.7	267.4	265.7	269.1	269.1	270.6	270.7	270.7	270.7	270.7	270.8	270.4	270.1	269.8	269.6	269.4	269.1	268.7	268.5	268.3	268.1	267.6	267.0	266.2	264.9	263.6	263.3	263.1	262.5	261.6	260.6	258.5	256.4	254.9	253.9	252.9	252.5	252.1	251.8	251.2	249.1	248.0	246.6
265.7	265.5	265.5	265.4	265.3	265.3	265.2	265.2	265.1	265.1	265.1	265.4	265.9	266.1	266.0	265.4	265.5	269.3	269.6	269.4	269.2	269.0	268.7	268.3	267.8	267.3	266.9	266.5	265.7	264.9	263.8	261.5	250.0	252.0	261.3	261.2	260.7	259.6	257.4	255.1	254.0	253.1	252.4	251.9	251.4	247.9	249.4	247.9	245.8	241.0
267.7	267.4	267.2	267.0	266.7	266.3	265.9	265.5	265.0	264.5	264.2	263.9	263.6	263.3	262.8	262.3	261.9	263.6	265.3	266.7	267.1	267.4	267.7	267.3	266.1	264.9	255.6	254.1	255.5	263.9	263.8	263.4	262.4	260.7	259.0	252.0	251.6	250.8	250.0	249.8	251.7	248.0	246.8	246.2	245.7	245.2	245.1	244.6	243.2	242.6
269.5	269.2	268.8	268.3	267.7	267.0	266.5	266.0	265.5	264.9	264.4	263.9	263.4	262.9	262.4	262.1	261.8	261.4	261.1	260.5	259.9	260.2	265.6	265.6	264.6	263.6	253.3	251.6	259.6	261.4	260.9	252.0	249.6	248.3	248.1	248.9	249.6	248.8	247.9	247.8	247.7	247.6	247.3	247.2	247.1	247.0	246.8	246.5	246.2	246.0
270.9	270.7	270.3	269.8	269.0	268.3	267.7	267.1	266.7	266.4	266.2	266.0	266.1	265.2	264.2	263.5	262.8	262.7	262.6	262.1	261.3	261.2	263.6	263.5	262.7	261.6	259.5	252.7	253.2	253.9	250.7	248.3	247.4	246.7	247.1	248.5	249.4	248.5	247.7	247.2	246.9	247.0	247.4	248.0	248.8	249.3	249.7	249.8	250.0	249.9
272.4	272.5	272.1	271.6	271.0	270.3	269.7	269.1	268.8	268.6	268.5	268.5	268.5	268.4	268.0	267.5	266.5	266.3	265.6	264.5	264.0	262.9	259.5	257.8	256.9	256.1	255.0	254.1	253.6	252.9	251.6	250.2	249.5	248.8	249.0	249.4	249.2	248.9	248.6	248.3	248.0	248.1	248.5	249.3	250.3	251.1	251.7	252.2	252.5	252.5
274.1	273.4	273.2	273.1	272.7	272.4	271.9	271.4	271.1	270.7	270.4	270.0	269.8	269.6	269.4	269.4	268.7	267.5	266.2	265.5	264.8	261.3	260.0	258.6	258.0	257.4	256.7	256.0	254.9	253.9	252.8	251.7	250.9	250.2	249.9	249.6	249.6	249.6	249.7	249.8	249.7	249.6	250.1	250.6	251.4	252.1	252.1	252.1	253.0	253.8
274.0	273.8	273.7	274.2	273.6	273.6	273.4	273.1	272.9	272.7	272.4	272.2	272.1	272.0	271.4	271.2	271.0	268.8	269.0	269.2	266.8	265.2	264.1	262.9	262.0	261.1	259.9	258.7	257.4	256.1	255.0	253.9	253.1	252.3	251.8	251.3	251.0	250.7	250.5	250.2	250.1	250.0	250.6	251.1	252.2	253.4	254.0	254.6	255.4	256.1
274.8	274.7	274.9	275.3	275.1	274.9	274.6	274.4	274.2	274.1	273.9	273.8	273.6	274.0	273.4	273.5	273.4	273.3	272.6	272.0	271.2	270.4	269.6	268.8	267.7	266.5	265.0	263.4	261.9	260.4	259.1	257.9	257.0	256.1	255.4	254.7	253.9	253.2	252.4	251.8	251.3	251.2	251.4	252.2	253.5	255.4	257.2	258.6	259.2	258.7
275.4	275.5	275.7	275.8	275.9	275.9	275.7	275.5	275.3	275.1	274.9	274.8	274.8	274.7	274.3	274.0	273.9	273.7	273.7	273.7	273.5	273.3	273.0	272.7	272.2	271.6	270.6	269.5	268.2	266.8	265.4	264.1	262.8	261.7	260.5	259.4	258.2	257.1	255.9	255.1	254.4	254.3	254.4	255.2	256.2	258.1	259.9	261.6	262.4	261.7
275.7	275.9	276.1	276.2	276.2	276.2	276.2	276.1	276.0	275.8	275.6	275.4	275.2	274.9	274.5	274.3	274.0	273.8	273.7	273.7	273.6	273.5	273.4	273.4	273.4	273.4	273.1	272.8	272.2	271.7	270.9	270.1	269.1	268.0	266.8	265.5	264.2	263.0	261.8	260.8	259.8	259.5	259.3	260.0	260.7	262.1	263.6	265.1	266.0	265.8
276.1	276.3	276.4	276.5	276.6	276.8	276.8	276.6	275.6	275.6	275.4	275.2	275.0	274.8	274.6	274.0	273.8	273.7	273.6	273.6	273.4	273.3	273.1	273.2	273.2	273.2	273.1	273.0	273.0	272.9	272.8	272.7	272.4	272.0	271.4	270.6	269.7	268.9	268.0	267.2	266.5	266.1	265.8	265.8	266.0	266.3	267.3	268.4	269.2	269.8
276.1	276.2	276.2	276.2	276.2	276.2	276.1	275.9	275.0	274.7	274.5	274.3	274.1	273.9	273.7	273.6	273.6	273.6	273.5	273.4	273.1	272.9	272.7	272.7	272.8	272.9	272.9	272.9	272.9	272.9	272.8	272.8	272.8	272.9	272.9	272.8	272.5	272.2	271.9	271.6	271.3	271.1	270.8	270.4	270.1	269.8	270.4	271.2	271.9	272.4
275.6	275.4	275.3	275.1	274.9	274.6	274.3	274.2	274.3	274.3	274.1	273.7	273.2	272.7	272.5	272.7	272.9	273.0	272.9	272.9	272.7	272.6	272.4	272.4	272.4	272.4	272.4	272.5	272.6	272.6	272.6	272.6	272.6	272.6	272.7	272.8	272.9	273.0	273.1	273.2	273.3	273.3	273.2	272.5	271.9	271.4	271.7	272.6	273.1	273.4
273.9	273.4	273.0	272.8	272.6	272.3	272.2	272.2	272.4	272.5	272.4	272.1	271.7	271.6	271.7	272.2	272.5	272.7	272.7	272.7	272.4	272.2	272.0	271.9	271.9	271.8	272.0	272.3	272.4	272.6	272.5	272.5	272.5	272.6	272.6	272.7	272.8	272.8	273.0	273.1	273.3	273.4	273.3	272.7	272.1	271.7	272.1	272.9	273.4	273.6
272.7	272.2	271.7	271.4	270.9	270.9	270.9	271.0	271.2	271.3	271.1	270.9	270.6	271.0	271.4	271.8	272.1	272.3	272.4	272.4	272.3	272.1	271.9	271.8	271.8	271.9	272.0	272.2	272.4	272.6	272.7	272.7	272.7	272.6	272.5	272.5	272.6	272.7	272.8	273.0	273.1	273.2	273.1	272.6	272.1	271.8	272.0	272.5	273.0	273.3
272.2	271.8	271.2	270.8	270.5	270.5	270.6	270.8	271.0	271.0	270.9	270.8	270.7	271.0	271.3	271.6	271.8	271.9	271.9	271.9	271.8	271.8	271.6	271.5	271.7	272.0	272.3	272.4	272.6	272.6	272.7	272.7	272.6	272.5	272.5	272.5	272.6	272.8	272.9	273.1	273.2	273.1	272.9	272.5	272.1	271.8	271.8	272.1	272.6	272.9
272.1	271.6	271.1	270.8	270.6	270.6	270.6	270.8	271.0	271.1	270.9	270.8	270.7	270.9	271.2	271.5	271.6	271.6	271.6	271.7	271.7	271.8	271.7	271.5	271.9	272.2	272.4	272.5	272.5	272.4	272.4	272.3	272.3	272.4	272.6	272.8	273.0	273.0	273.1	273.2	273.1	272.9	272.6	272.2	271.8	271.4	271.3	271.5	272.0	272.5
272.5	272.0	271.5	271.1	270.9	270.9	270.9	271.2	271.3	271.3	271.1	271.0	271.2	271.3	271.4	271.4	271.5	271.5	271.6	271.7	271.8	272.0	272.1	272.3	272.4	272.5	272.5	272.5	272.3	272.2	272.2	272.2	272.2	272.3	272.5	272.7	273.0	273.0	273.1	273.2	273.1	272.8	272.3	271.6	271.0	270.5	270.5	270.8	271.3	271.7
272.9	272.3	271.8	271.1	271.0	271.0	271.1	271.3	271.4	271.4	271.4	271.3	271.4	271.3	271.2	271.1	271.3	271.7	272.1	272.4	272.6	272.8	272.9	272.9	272.8	272.6	272.4	272.2	272.1	272.0	271.9	272.0	272.2	272.4	272.6	272.7	272.9	272.9	272.9	273.0	273.0	272.6	271.9	270.8	269.9	269.2	269.4	269.9	270.5	270.7
273.1	272.5	271.9	271.3	271.0	270.9	271.0	271.1	271.2	271.3	271.4	271.4	271.4	271.3	271.2	271.2	271.4	271.7	272.3	272.7	273.0	273.2	273.2	273.1	273.0	272.6	272.3	272.1	272.0	271.9	271.9	272.0	272.4	272.6	272.7	272.8	272.8	272.6	272.6	272.7	272.6	272.1	271.1	269.2	268.0	267.3	268.0	268.9	269.9	270.2
273.2	272.8	272.2	271.6	271.2	271.0	270.8	270.8	270.9	271.1	271.4	271.6	271.8	271.9	272.0	272.1	272.3	272.5	272.6	272.8	272.9	273.0	273.0	272.9	272.8	272.5	272.2	272.2	272.0	271.9	271.7	271.6	272.2	272.7	272.9	273.0	272.9	272.6	272.4	272.2	271.7	270.7	269.0	266.9	265.5	265.4	266.6	268.3	269.5	269.9
273.4	273.0	272.5	272.0	271.5	271.1	270.8	270.6	270.7	270.9	271.1	271.4	271.8	272.0	272.3	272.6	272.8	272.9	273.0	273.0	272.9	272.8	272.7	272.6	272.5	272.4	272.3	272.2	272.0	271.8	271.5	271.4	272.0	272.8	273.2	273.4	273.2	273.0	272.6	272.1	271.1	269.8	267.9	265.8	265.1	265.3	266.2	267.7	268.9	269.4
274.0	273.5	273.0	272.4	271.9	271.4	271.0	270.7	270.6	270.5	270.6	270.8	271.1	271.4	271.6	272.0	272.4	272.6	272.7	272.6	272.6	272.6	272.6	272.5	272.5	272.4	272.3	272.3	272.4	272.3	272.0	271.8	272.4	272.9	273.3	273.5	273.3	273.1	272.8	272.5	271.6	270.4	268.6	266.2	266.1	266.4	266.8	267.0	268.1	268.4
274.5	274.0	273.5	272.9	272.3	271.7	271.2	270.8	270.7	270.5	270.3	270.3	270.5	270.6	270.8	271.3	271.9	272.3	272.5	272.5	272.6	272.6	272.6	272.5	272.5	272.4	272.3	272.5	272.8	272.8	272.6	272.4	272.7	273.1	273.4	273.5	273.4	273.2	273.1	272.9	272.0	270.8	269.2	267.3	266.7	266.8	267.0	266.4	266.9	266.9
275.0	274.3	273.7	273.2	272.7	272.1	271.6	271.2	270.9	270.7	270.6	270.5	270.4	270.5	270.9	271.5	272.1	272.5	272.7	272.8	272.7	272.7	272.7	272.7	272.7	272.6	272.6	272.7	273.2	273.3	273.1	272.8	272.9	272.9	273.0	273.3	273.6	273.6	273.2	272.6	271.4	270.1	268.6	267.1	266.5	266.3	266.1	266.0	265.6	265.3
275.5	274.5	273.7	273.1	272.6	272.2	271.9	271.5	271.3	271.3	271.3	271.2	271.3	271.4	271.7	272.3	272.8	273.1	273.2	273.2	273.0	272.8	272.7	272.6	272.7	272.7	272.7	272.9	273.3	273.5	273.4	273.3	273.2	273.0	273.0	273.4	273.7	273.2	272.1	270.6	269.5	268.3	267.1	265.7	265.1	264.9	264.9	264.6	264.2	263.8
275.7	274.6	273.6	273.0	272.5	272.2	271.9	271.6	271.6	271.8	272.0	272.3	272.5	272.7	272.9	273.3	273.7	273.8	273.7	273.4	273.1	272.8	272.6	272.4	272.4	272.4	272.5	272.8	273.2	273.3	273.3	273.2	273.0	272.9	272.9	273.1	273.1	272.1	270.6	268.9	267.7	266.5	265.3	264.0	263.3	263.1	263.2	263.5	263.7	263.8
275.6	275.3	274.4	273.2	272.6	272.3	272.2	272.2	272.3	272.4	272.7	273.1	273.5	273.8	274.0	274.2	274.3	274.1	273.7	273.2	272.9	272.6	272.5	272.2	272.1	272.1	272.2	272.4	272.4	272.4	272.5	272.8	272.9	272.9	272.9	273.0	272.3	270.9	269.3	267.5	266.4	265.4	264.4	263.6	262.7	262.4	262.7	263.8	264.8	265.3
274.4	274.3	274.3	273.8	273.0	272.8	272.8	272.9	273.1	273.3	273.6	274.0	274.5	274.8	275.0	275.0	274.9	274.6	274.3	273.8	273.4	273.0	272.8	272.4	272.2	272.0	272.0	272.1	272.0	271.9	271.9	272.3	272.6	272.8	272.8	272.5	271.5	269.9	268.3	266.8	265.7	265.1	264.7	264.4	264.4	264.7	264.1	264.8	266.2	267.0
274.2	273.5	273.4	273.5	273.4	273.5	273.6	273.9	274.1	274.3	274.8	275.2	275.6	276.0	276.0	275.8	275.6	275.6	275.6	275.2	274.6	274.0	273.5	273.2	272.8	272.5	272.2	272.2	272.0	271.8	271.9	272.2	272.8	272.9	272.7	272.0	270.9	269.3	267.8	266.7	266.0	265.9	265.9	266.4	266.9	266.1	265.6	266.3	266.9	266.0
274.4	273.3	272.8	273.1	273.8	274.3	274.9	275.3	275.5	276.0	275.9	276.1	276.4	276.7	276.7	276.6	276.6	276.6	276.6	276.0	275.3	274.6	274.1	273.8	273.6	273.3	273.0	272.9	272.8	272.7	272.6	272.7	273.2	273.2	271.8	270.7	269.6	269.1	268.5	268.1	267.3	268.1	268.4	268.4	268.3	268.5	266.7	265.6	265.6	265.0
273.6	272.9	272.7	273.3	274.5	275.6	276.4	277.8	277.7	277.8	277.8	277.7	277.9	277.7	277.1	277.3	277.5	277.4	277.4	276.4	275.7	275.2	275.0	274.5	274.3	274.2	274.0	274.0	274.0	273.9	273.5	273.1	273.8	273.5	272.4	270.9	269.8	269.0	269.7	269.5	269.4	268.9	268.8	268.7	268.4	268.9	266.2	264.8	264.1	264.8
273.5	273.4	273.7	274.4	275.6	276.6	277.7	279.1	279.5	279.6	279.5	279.4	278.7	278.2	279.4	279.4	279.3	278.7	278.3	277.7	276.9	276.0	275.5	274.4	274.1	274.2	274.5	274.9	275.1	274.7	274.0	273.6	274.0	273.7	272.8	272.3	271.7	271.5	271.2	270.9	270.5	270.2	270.0	270.2	269.4	268.8	268.4	266.7	265.7	265.4
275.5	275.4	275.3	275.4	276.3	277.1	279.3	280.2	280.5	280.5	280.4	280.3	280.3	280.1	280.4	280.7	280.7	280.5	280.3	278.3	277.1	275.6	274.9	274.1	273.5	273.5	274.2	274.9	275.4	275.4	274.8	274.9	275.4	275.3	275.4	274.0	273.8	273.3	272.0	270.6	270.7	270.9	271.4	271.3	269.8	271.3	270.5	269.3	268.2	268.3
276.3	276.1	275.8	275.7	276.8	279.3	280.2	280.9	281.0	280.8	280.7	280.7	280.9	281.1	281.3	281.5	281.5	281.5	281.2	280.7	279.6	276.0	274.8	273.2	271.6	271.4	272.7	273.4	273.6	274.0	274.7	276.0	276.9	277.2	277.1	277.2	275.3	274.2	272.1	271.2	271.4	271.7	272.1	271.9	271.0	272.0	270.9	271.6	271.1	270.4
276.0	276.0	276.1	276.4	277.4	280.0	280.9	281.3	281.3	281.2	281.2	281.1	281.1	281.2	281.4	281.6	281.7	281.7	281.7	281.6	281.2	280.5	280.0	274.9	273.0	271.0	269.9	269.8	270.1	270.8	272.0	276.0	277.4	278.2	278.3	278.4	278.2	277.4	273.8	273.3	273.0	273.0	272.9	272.3	271.3	270.6	271.2	271.7	272.0	271.8
275.6	276.2	277.1	277.7	279.1	280.6	281.3	281.7	281.7	281.4	281.2	280.2	279.7	279.5	280.8	280.7	281.2	281.5	281.6	281.7	281.8	281.9	280.6	277.3	275.3	273.0	271.6	271.7	272.6	271.8	271.8	273.1	277.2	278.5	278.8	279.2	279.2	277.3	276.3	274.9	274.5	274.3	274.0	273.2	271.7	270.6	270.9	272.4	273.6	273.7
277.5	277.9	278.6	279.3	280.3	281.0	281.4	281.9	281.7	280.7	279.7	278.6	277.7	277.4	276.9	277.1	278.5	280.2	279.6	279.3	279.2	279.3	275.6	275.0	273.9	272.8	273.4	274.5	275.9	275.9	274.5	273.7	275.4	278.4	279.1	279.8	280.0	279.6	277.9	277.1	276.0	275.5	275.2	274.8	273.4	273.1	273.5	274.8	275.4	275.2
281.2	279.7	280.9	280.6	281.7	282.1	281.7	281.3	280.2	279.0	277.7	276.6	275.8	275.3	274.8	274.7	275.6	275.8	275.0	274.3	274.0	274.3	274.3	273.8	273.2	272.7	273.1	272.5	273.5	276.0	277.5	277.5	276.9	277.4	279.5	280.4	280.8	280.5	278.4	277.5	277.0	276.6	276.7	276.6	275.7	275.8	276.2	276.3	276.3	276.2
283.0	283.0	282.3	282.4	282.7	282.8	282.0	280.9	279.7	278.2	276.5	275.2	274.4	274.1	273.9	273.5	273.2	273.8	274.2	274.9	274.9	274.6	273.9	273.0	272.3	272.0	272.8	272.6	271.6	273.0	276.7	278.7	279.3	280.5	281.0	281.4	281.6	281.3	280.2	279.0	278.8	278.7	278.8	278.7	278.2	277.7	277.3	277.3	276.9	276.6
284.4	284.9	285.1	285.1	285.2	284.4	283.0	281.5	279.9	278.0	275.8	274.2	273.7	274.1	274.7	274.7	274.2	274.5	276.1	277.6	278.2	277.3	274.9	272.5	271.2	270.7	271.0	271.6	271.9	272.9	273.8	275.3	277.0	280.9	282.3	282.5	282.7	282.3	281.5	281.3	281.1	280.1	279.5	279.6	279.7	279.1	278.3	278.2	278.2	278.1
285.3	286.1	286.5	287.0	286.7	285.4	284.0	282.1	280.1	278.0	275.9	274.4	273.5	274.0	275.9	277.3	277.2	277.5	278.7	280.1	280.9	280.4	277.9	274.9	272.4	270.2	269.4	270.6	271.0	271.5	271.7	271.5	272.7	281.1	283.4	283.6	283.7	283.2	283.0	283.3	282.8	280.7	277.7	276.6	278.1	278.9	279.2	279.1	279.1	279.4
286.0	286.7	287.4	287.8	287.3	285.5	282.9	281.3	281.7	280.4	278.1	276.6	275.9	277.5	281.2	283.2	282.3	282.1	283.1	283.7	283.4	282.6	281.2	279.8	278.7	276.1	272.3	271.8	271.9	272.4	272.1	272.5	274.3	276.4	281.6	282.8	284.1	284.5	284.2	283.5	281.7	278.8	276.2	274.9	275.2	276.9	278.0	279.6	279.4	280.1
286.7	287.2	287.7	288.2	288.5	287.4	283.6	282.2	285.9	284.5	282.1	281.0	281.4	285.1	286.7	287.2	285.5	285.0	285.5	285.8	285.8	285.4	285.3	285.4	285.1	283.0	277.9	275.5	274.3	273.8	273.2	272.6	273.3	274.7	275.2	276.2	279.9	281.6	278.6	278.8	277.6	276.3	275.9	275.9	275.4	275.5	278.2	279.4	280.7	280.9
287.4	287.9	288.2	288.5	288.8	288.5	287.5	286.9	288.2	288.2	286.9	286.7	287.0	287.3	287.5	287.0	286.3	286.0	286.1	285.9	286.0	286.2	286.4	286.9	287.3	286.7	284.5	280.9	276.7	274.3	273.1	272.6	272.2	272.1	272.3	272.0	272.1	273.6	274.9	275.4	275.8	276.4	277.2	277.5	277.1	276.6	276.6	279.2	280.1	280.3
287.2	287.8	288.3	288.5	288.9	289.1	289.2	289.2	289.3	289.4	289.1	289.1	288.5	288.4	288.1	287.3	286.1	285.3	285.1	285.2	285.6	286.1	286.5	286.9	287.4	287.5	286.6	284.5	280.6	275.6	272.8	271.8	270.9	271.0	272.6	274.2	274.4	274.4	275.6	276.9	277.7	278.4	278.8	278.4	277.8	277.7	277.3	276.8	278.5	279.4
288.1	288.5	288.6	288.7	288.9	289.3	289.4	289.2	289.0	289.2	289.4	289.3	288.9	288.8	288.0	285.5	284.0	283.8	284.0	284.4	284.8	285.4	285.9	286.5	287.2	287.7	287.4	286.1	282.6	277.5	274.0	272.0	270.9	271.3	272.6	274.6	275.9	276.7	277.9	278.9	279.5	280.0	280.3	280.0	279.6	279.3	279.3	278.9	279.5	279.2
288.7	288.8	289.0	289.0	289.1	289.5	289.8	289.5	289.2	289.2	289.4	289.5	289.3	288.8	287.0	283.8	282.8	283.6	283.8	283.6	283.7	284.1	284.9	286.0	286.9	287.7	287.5	286.6	284.0	279.9	277.3	275.4	273.3	271.7	272.0	272.2	273.9	275.8	277.6	278.9	279.8	280.7	281.3	280.9	279.8	278.5	278.1	278.7	280.3	279.8
289.4	289.3	289.3	289.4	289.5	289.8	290.0	289.9	289.6	289.4	289.4	289.4	289.1	288.7	287.5	284.9	283.7	284.0	283.8	283.1	283.0	283.5	284.4	285.6	286.9	287.8	287.9	287.5	286.2	283.8	281.9	280.6	277.5	273.4	271.9	272.4	275.1	277.4	279.1	280.3	281.1	281.6	281.9	281.5	280.5	279.2	277.2	277.1	280.0	280.7
290.5	290.5	290.1	290.0	290.0	290.0	290.1	290.0	289.9	289.7	289.3	289.1	288.8	288.5	287.9	285.7	284.4	284.4	283.9	283.1	283.0	283.7	284.8	285.8	286.7	287.5	288.1	288.2	288.2	287.7	286.8	286.2	284.0	278.1	273.1	272.7	275.9	279.2	281.1	281.8	282.4	282.6	282.0	281.9	282.3	281.4	278.5	277.3	280.2	281.8
292.4	291.9	291.7	290.7	290.6	290.4	290.2	290.1	290.4	291.2	289.6	289.0	288.5	288.4	287.5	285.6	285.2	285.5	284.7	283.8	283.5	284.3	285.7	286.4	286.9	287.4	288.3	289.1	289.8	290.0	289.8	289.3	288.2	283.9	277.4	273.2	273.6	276.9	280.1	281.2	282.1	283.0	281.9	281.8	284.0	284.3	281.8	279.8	281.0	282.5
292.0	291.7	291.8	292.3	292.8	292.6	291.8	291.0	291.6	291.5	290.7	289.6	288.5	287.9	287.0	285.5	285.5	285.9	285.7	285.0	284.5	285.1	286.5	287.3	287.4	287.6	288.5	289.8	291.0	291.4	291.7	291.3	290.2	287.8	283.3	277.9	273.4	273.8	277.6	279.7	280.9	281.8	280.9	280.7	284.3	286.9	285.4	282.2	281.7	282.8
292.3	292.0	292.2	293.1	293.4	292.9	292.2	291.7	291.8	291.2	290.5	289.6	287.9	287.2	286.7	286.0	285.9	285.8	286.1	285.8	285.5	286.0	287.0	287.7	288.0	288.2	288.9	290.0	291.1	291.6	292.5	292.8	290.5	289.3	286.5	283.9	277.6	274.5	276.4	279.1	280.2	280.4	279.0	278.8	283.0	287.8	288.1	284.3	282.3	283.1
292.4	292.3	292.5	293.3	293.3	292.6	292.1	292.1	291.8	291.0	290.5	290.1	288.0	288.0	287.8	287.2	287.0	285.9	285.9	286.0	286.0	286.4	287.3	287.9	288.3	288.8	289.5	290.3	291.0	291.4	292.5	293.4	290.8	290.1	290.5	288.3	282.5	277.6	277.9	280.2	281.1	281.2	280.0	279.6	282.8	287.1	289.1	286.3	283.0	283.1
292.1	292.1	292.3	292.6	292.6	292.2	292.4	292.7	292.3	291.4	290.7	291.2	290.0	291.1	290.5	288.8	287.6	286.3	286.0	286.0	286.1	286.5	287.5	288.1	288.7	289.1	289.9	290.6	291.1	291.3	292.1	293.4	291.5	291.3	291.7	290.6	287.1	283.1	282.7	283.9	284.2	284.9	284.5	284.7	286.6	287.8	288.7	287.3	284.4	283.6
291.9	291.8	292.0	292.1	292.3	292.3	292.6	293.0	292.8	292.1	291.0	291.7	291.7	292.7	292.7	291.5	288.0	286.1	286.5	286.7	286.6	286.7	287.2	288.1	288.9	289.4	290.0	290.6	291.2	291.5	291.8	293.3	293.7	292.7	292.4	292.2	291.0	289.0	288.3	287.7	288.4	289.6	289.8	290.4	290.8	290.4	290.2	289.0	286.8	284.9
291.9	291.8	291.7	291.8	292.2	292.4	292.5	292.9	292.9	292.5	292.1	292.5	293.5	293.1	294.0	295.3	291.3	287.5	287.4	287.6	287.3	287.3	287.4	288.1	289.1	290.0	290.6	290.8	290.9	291.2	291.4	292.6	294.0	294.4	293.5	294.1	293.8	293.2	293.3	291.8	292.4	293.4	293.1	293.7	291.6	290.8	291.5	290.8	289.1	287.3
292.1	291.9	291.5	291.6	292.0	292.4	292.2	292.3	292.7	292.6	292.7	293.3	293.8	293.2	294.0	295.1	294.9	291.2	290.3	289.7	288.5	288.5	289.3	289.9	290.5	291.0	291.2	291.0	290.8	290.8	291.1	291.9	293.0	293.8	294.0	294.3	294.6	294.4	294.5	294.0	294.0	294.2	294.0	293.4	292.6	292.5	292.9	292.3	291.7	291.5
292.5	292.0	291.3	291.3	291.8	292.2	292.3	292.4	292.8	292.7	293.1	294.1	294.4	295.0	294.2	294.6	295.0	293.8	293.1	292.4	290.5	289.9	290.6	291.6	291.9	291.7	291.8	291.6	291.3	291.1	291.2	291.6	292.3	293.3	295.4	296.6	293.9	293.8	294.2	294.4	294.9	295.7	295.0	293.3	293.4	294.4	294.5	294.6	294.4	294.5
292.9	291.8	290.8	290.7	291.5	292.1	292.6	293.1	293.3	293.1	293.7	294.7	295.1	295.4	294.4	294.7	294.9	294.4	294.2	293.6	292.4	291.6	291.7	292.4	292.5	292.1	292.1	292.4	292.4	292.3	292.2	292.0	292.4	293.6	295.9	297.1	294.3	294.1	294.3	294.8	296.8	296.5	294.8	293.1	293.4	293.7	293.7	293.5	293.5	293.5
293.0	291.4	290.3	290.5	291.5	292.4	293.0	293.6	293.9	293.8	294.4	295.3	295.7	295.7	295.4	294.7	295.3	295.7	295.9	295.1	293.5	292.5	292.6	293.2	293.2	293.0	293.1	293.5	293.9	293.6	293.4	293.0	293.5	294.9	296.6	297.8	297.7	297.3	296.9	296.8	297.6	296.8	294.6	293.4	293.5	293.6	293.2	293.3	293.3	293.4
292.9	291.4	290.5	291.0	292.0	292.8	293.5	294.0	294.3	294.5	295.0	295.8	296.1	296.2	295.9	294.7	295.5	296.0	296.3	295.9	294.6	292.8	293.2	294.1	294.1	294.1	294.5	295.1	295.5	294.9	294.4	294.3	295.0	296.5	297.7	298.5	298.7	298.3	297.7	297.4	297.5	297.2	295.7	294.2	294.2	294.1	293.0	293.4	293.7	293.9
292.7	291.6	291.2	291.5	292.3	293.0	293.6	294.0	294.5	294.8	295.2	296.1	296.6	296.6	296.2	296.5	295.9	296.3	296.5	296.6	296.1	293.8	294.2	295.1	295.1	295.2	295.6	296.4	296.7	296.1	295.6	295.8	296.8	297.8	298.5	298.8	298.8	298.2	297.5	297.2	297.3	297.7	297.4	296.3	295.6	294.9	294.1	293.6	294.1	294.3
292.7	291.9	291.6	291.8	292.4	293.0	293.6	294.1	294.6	295.0	295.3	296.4	297.2	297.0	296.5	297.4	298.4	296.5	296.7	297.5	297.4	294.8	294.9	295.8	295.9	296.2	296.6	297.5	297.7	297.2	297.1	297.5	298.3	298.9	299.2	299.2	298.9	298.4	297.8	297.5	297.5	298.0	298.2	298.1	297.6	296.7	295.6	294.3	294.5	294.7
292.8	292.3	292.0	292.1	292.5	293.1	294.0	294.7	295.3	295.6	296.0	297.2	298.0	297.9	297.6	298.2	298.3	296.4	296.8	297.5	298.6	295.6	294.5	295.4	296.4	297.1	297.8	298.7	298.8	298.4	298.4	299.0	299.6	300.0	299.9	299.6	299.2	298.7	298.2	297.9	297.9	298.0	298.3	298.3	298.1	297.3	295.4	295.0	295.0	295.1
292.9	292.8	292.6	292.4	292.8	293.7	294.6	295.6	296.3	296.8	297.3	298.3	299.2	299.5	299.2	298.8	298.0	296.2	297.0	297.8	298.7	296.3	295.2	295.1	296.6	297.8	298.4	299.2	299.6	299.4	299.6	300.3	300.8	300.9	300.6	300.2	299.5	298.8	298.3	298.2	298.2	298.2	298.1	298.0	297.5	295.5	295.3	295.4	295.5	295.5
293.1	293.3	293.1	292.9	293.2	294.2	295.3	296.3	297.1	297.7	298.3	299.1	300.2	300.8	300.6	299.4	297.6	296.1	297.1	297.9	298.6	298.4	297.4	296.0	296.0	297.6	298.4	299.2	299.8	300.1	300.6	301.4	301.8	301.8	301.5	300.8	299.8	298.9	298.4	298.4	298.5	298.5	298.4	297.9	297.2	295.5	295.7	295.9	296.0	296.0
293.2	293.7	293.8	293.5	293.7	294.6	295.6	296.7	297.6	298.3	298.8	299.4	300.6	301.6	301.9	300.4	298.4	296.9	297.3	298.1	298.7	298.4	298.8	297.8	295.3	296.2	298.2	299.4	300.1	300.7	301.4	302.1	302.4	302.4	302.1	301.3	300.1	298.9	298.3	298.2	298.5	298.7	297.7	296.6	296.4	296.2	296.4	296.6	296.5	296.4
293.3	294.0	294.3	294.3	294.5	295.2	296.0	297.0	297.9	298.8	299.3	299.8	301.2	302.4	302.9	301.9	300.4	299.0	297.6	297.6	298.2	298.1	298.9	299.7	296.7	295.2	298.0	300.2	300.6	301.1	301.6	302.2	302.5	302.4	301.7	300.6	299.3	298.3	297.8	297.7	297.9	298.2	296.8	296.4	296.7	296.8	297.0	297.1	297.0	296.7
293.7	294.2	294.5	294.7	295.1	295.8	296.6	297.2	298.0	299.0	300.0	300.7	301.9	303.2	303.9	303.7	302.9	300.8	297.3	296.9	297.4	298.1	298.8	299.6	299.5	295.9	297.0	299.9	300.7	301.0	301.2	301.5	301.4	300.9	300.1	299.0	297.7	296.6	296.7	297.4	297.3	296.2	296.5	296.9	297.1	297.2	297.4	297.4	297.2	296.9
294.5	294.5	294.5	294.7	295.3	296.3	297.2	297.8	298.4	299.6	300.8	301.6	302.5	303.6	304.6	304.9	304.6	302.5	297.5	294.9	297.1	298.3	298.8	299.7	302.3	297.9	296.5	299.6	300.5	300.6	300.3	300.3	300.0	299.6	299.0	298.8	298.2	295.0	295.2	296.5	296.4	296.4	296.9	297.2	297.3	297.6	297.8	297.8	297.6	297.4
295.9	295.3	294.8	294.9	295.7	296.8	297.8	298.6	299.4	300.6	301.7	302.3	302.9	303.3	304.4	305.1	305.2	303.5	299.0	296.8	298.5	298.8	298.6	299.5	303.1	298.5	295.5	299.3	301.4	301.3	300.4	299.5	299.0	299.0	299.0	298.9	299.0	296.7	296.4	296.7	296.5	296.7	297.1	297.4	297.6	297.9	298.1	298.2	298.0	297.9
297.6	296.5	296.0	296.1	296.7	297.7	298.6	299.6	300.6	301.6	302.4	302.8	303.3	303.9	304.6	305.3	305.2	304.0	300.6	297.5	299.7	301.9	299.3	299.4	300.5	298.5	295.0	297.7	299.7	299.3	298.2	297.3	297.0	298.0	298.7	297.6	297.4	297.2	296.9	296.7	296.6	296.8	297.2	297.6	297.8	298.1	298.3	298.5	298.5	298.4
298.5	297.7	297.7	297.9	298.2	298.6	299.2	300.1	301.0	301.8	302.6	303.3	304.2	304.8	305.2	305.7	305.2	303.7	300.9	297.4	299.6	303.9	303.9	299.5	299.2	299.0	296.4	296.3	297.0	297.6	297.7	297.4	297.5	297.1	298.2	298.2	297.7	297.3	296.9	296.8	296.7	296.9	297.4	297.6	297.9	298.2	298.4	298.6	298.8	298.8
298.9	298.9	299.2	299.4	299.5	299.6	299.9	300.5	301.2	302.0	303.0	303.9	304.9	305.5	306.0	305.8	304.0	301.6	299.6	297.3	299.1	304.0	305.2	303.6	299.9	302.1	300.0	298.6	297.7	299.0	298.6	297.9	298.1	298.4	298.7	298.6	298.1	297.5	297.1	296.9	296.9	297.1	297.4	297.6	297.9	298.1	298.4	298.6	298.8	299.0
299.7	300.0	300.3	300.5	300.9	301.1	301.1	301.3	301.6	302.4	303.6	304.5	305.1	306.0	306.3	305.0	301.9	299.1	297.6	296.5	298.4	303.2	305.0	304.1	302.0	302.3	301.5	299.4	298.1	298.5	298.6	298.4	298.6	298.7	298.8	298.7	298.3	297.9	297.3	297.0	297.1	297.3	297.4	297.6	297.9	298.2	298.4	298.6	298.8	299.0
301.2	301.1	301.1	301.5	302.1	302.5	302.5	302.1	302.0	302.9	304.4	304.9	305.0	305.4	305.1	303.3	300.6	298.0	296.6	295.4	297.1	301.9	303.8	303.4	301.6	298.3	298.2	298.6	298.4	298.4	298.2	298.0	298.2	298.3	298.5	298.4	298.3	298.3	297.8	297.4	297.4	297.5	297.5	297.7	297.9	298.3	298.5	298.7	298.9	299.2
302.2	302.0	301.9	302.4	303.2	303.8	303.8	303.1	303.0	304.0	305.3	305.4	304.5	304.1	303.6	301.9	299.5	297.0	295.6	294.2	295.9	301.2	303.5	303.1	301.5	298.8	298.3	298.2	298.1	298.3	298.4	297.8	299.7	299.8	299.7	299.6	298.3	298.5	298.3	298.0	297.8	297.8	297.7	297.8	298.0	298.4	298.6	298.9	299.1	299.4
302.8	302.7	302.8	303.3	304.1	304.9	305.1	304.6	304.6	305.2	305.7	305.8	304.4	303.0	302.9	301.7	299.5	297.3	296.0	294.1	295.6	300.8	303.1	302.5	300.7	300.2	299.8	299.6	300.0	300.8	301.1	300.3	300.4	300.6	300.3	298.6	298.5	298.6	298.4	298.2	298.1	298.1	298.1	298.1	298.3	298.5	298.8	299.0	299.3	299.5
303.2	303.1	303.4	304.0	304.7	305.4	305.7	305.6	305.5	305.6	305.7	305.9	304.8	302.3	301.5	301.0	299.3	297.3	295.5	293.7	296.2	300.3	301.2	300.7	299.5	299.1	299.9	300.3	301.1	302.2	302.5	301.8	301.3	301.2	301.2	299.0	298.6	298.6	298.4	298.3	298.3	298.3	298.4	298.5	298.7	298.8	299.0	299.2	299.4	299.4
303.2	303.5	304.1	304.7	305.3	305.7	305.9	306.0	305.9	305.6	305.8	306.4	305.5	302.5	299.7	298.5	297.4	295.5	293.9	293.8	296.4	298.6	299.2	300.5	300.8	300.7	301.2	301.9	302.6	303.5	303.8	303.3	302.4	301.9	301.4	298.8	298.7	298.6	298.5	298.5	298.5	298.5	298.7	298.8	299.0	299.0	299.2	299.2	299.2	299.2
303.7	304.1	304.8	305.5	306.0	306.1	306.1	306.4	306.5	305.9	305.9	306.5	307.1	303.5	297.0	294.1	294.5	293.8	293.2	293.6	294.6	297.0	300.1	302.7	303.5	303.4	303.4	303.9	304.4	304.3	303.9	303.5	303.2	302.8	299.4	298.6	298.7	298.6	298.5	298.5	298.6	298.7	298.9	298.9	299.1	299.2	299.3	299.1	298.9	298.9
304.9	305.1	305.6	306.0	306.5	306.7	306.7	306.7	307.0	306.2	305.6	305.7	307.2	303.7	295.2	291.5	291.8	292.8	293.0	292.1	292.4	296.7	301.6	304.5	305.1	305.1	304.8	304.9	305.2	305.2	304.8	304.3	303.7	302.7	299.1	298.7	298.7	298.6	298.6	298.6	298.8	298.9	299.0	299.1	299.3	299.5	299.5	299.0	298.8	298.7
305.7	306.0	306.1	306.3	306.7	307.1	307.3	307.3	307.3	306.7	305.5	305.0	305.5	302.2	295.6	293.2	293.2	294.4	293.3	292.3	293.7	298.7	302.9	305.3	306.4	306.7	306.1	305.6	305.6	306.0	305.9	305.2	303.7	299.3	298.8	298.8	298.8	298.8	298.8	298.9	299.1	299.2	299.1	299.2	299.5	299.8	299.7	299.0	298.8	298.7
305.8	306.2	306.3	306.4	306.6	306.9	307.1	307.2	307.2	306.5	305.7	305.5	304.2	298.6	296.4	297.5	296.2	296.4	295.6	295.3	298.4	302.4	304.7	305.6	306.7	307.5	307.3	306.4	305.9	306.4	306.2	305.0	302.7	298.7	298.9	299.0	299.0	299.1	299.2	299.3	299.4	299.4	299.3	299.5	299.8	300.0	299.6	299.0	298.7	298.6
305.5	305.8	306.0	306.1	306.4	306.6	306.5	306.5	306.6	306.7	305.9	305.9	303.9	298.7	300.2	302.8	301.3	299.8	298.8	299.8	301.8	303.7	305.7	306.8	306.9	306.7	306.8	306.7	306.0	306.4	305.9	304.0	298.7	298.4	298.9	299.0	299.2	299.3	299.5	299.5	299.4	299.5	299.5	299.6	299.9	300.0	299.5	298.9	298.7	298.6
304.1	304.5	305.3	305.7	306.0	306.1	305.8	305.4	305.3	305.4	304.3	302.3	299.8	299.9	304.0	306.6	305.7	303.6	301.7	302.1	303.3	304.6	306.5	308.1	307.9	306.0	305.2	306.3	306.4	306.5	305.6	299.9	298.2	298.4	298.8	299.0	299.0	299.2	299.2	299.3	299.4	299.5	299.6	299.8	300.0	299.8	299.5	299.1	298.8	298.7
303.0	303.5	303.9	304.6	305.2	305.4	305.2	304.6	304.0	304.0	302.1	298.2	295.6	299.6	304.8	307.5	307.8	306.5	304.7	304.3	305.1	306.3	307.6	308.7	308.5	306.6	305.4	306.4	307.0	306.4	304.5	299.1	298.3	298.5	298.7	298.8	298.8	299.0	299.1	299.2	299.3	299.5	299.6	299.7	299.7	299.4	299.1	299.1	299.0	299.0
302.1	301.9	302.2	302.9	303.5	303.7	303.8	303.0	302.4	302.5	300.0	297.2	297.1	299.8	304.3	307.7	308.2	307.6	306.9	307.0	307.5	308.1	308.5	309.1	308.8	307.7	307.4	307.9	307.2	301.9	299.7	298.6	298.6	298.7	298.8	298.8	298.8	298.9	299.1	299.2	299.3	299.4	299.5	299.6	299.5	299.2	299.1	299.2	299.4	299.3
301.0	300.4	300.3	301.1	301.5	301.9	301.7	300.5	300.4	300.4	297.5	297.0	298.7	299.7	302.8	306.4	306.7	306.0	306.1	307.2	308.4	309.4	309.8	309.9	309.4	309.0	308.1	307.6	305.4	300.1	299.0	299.0	298.9	298.9	298.8	298.9	299.0	299.1	299.2	299.2	299.3	299.4	299.5	299.4	299.3	299.3	299.4	299.7	299.9	299.8
300.2	299.7	299.1	298.9	298.9	299.5	299.2	298.1	298.7	298.1	295.9	296.2	297.9	298.2	300.2	303.4	303.7	303.7	304.3	305.9	307.9	309.5	310.3	310.6	310.0	308.5	304.8	301.7	300.2	299.4	299.2	299.2	299.1	299.1	298.9	299.0	299.1	299.2	299.2	299.3	299.4	299.5	299.5	299.5	299.6	299.7	300.0	300.3	300.4	300.2
298.7	298.9	298.7	297.8	297.6	297.7	296.5	295.1	295.2	295.5	294.5	294.3	295.8	296.9	298.3	300.3	300.4	301.4	302.7	304.4	307.1	309.2	310.3	310.3	308.6	306.1	299.5	299.2	299.5	299.4	299.4	299.4	299.3	299.1	299.0	299.0	299.1	299.2	299.3	299.3	299.3	299.4	299.5	299.7	300.0	300.3	300.4	300.4	300.4	300.1
297.3	298.0	298.1	297.4	297.5	296.7	295.1	293.3	293.1	293.7	294.0	293.8	294.4	297.1	298.2	298.0	297.9	299.7	301.5	303.0	306.0	308.4	309.2	308.2	306.0	299.8	299.0	299.1	299.3	299.5	299.6	299.6	299.4	299.2	299.1	299.1	299.2	299.2	299.3	299.3	299.2	299.3	299.7	300.0	300.3	300.4	300.4	300.3	300.1	299.7
296.8	297.3	297.2	296.7	296.8	295.7	294.2	293.0	292.9	293.6	293.8	293.6	294.0	296.0	297.6	297.5	298.2	300.0	301.1	302.0	304.5	306.6	306.6	305.5	299.9	299.0	299.0	299.2	299.5	299.7	299.8	299.8	299.7	299.4	299.3	299.2	299.2	299.3	299.2	299.3	299.4	299.5	299.9	300.3	300.4	300.3	300.2	300.1	299.7	299.4
296.6	296.9	296.7	296.3	296.4	294.8	292.7	292.4	292.9	293.6	293.8	293.4	294.0	295.1	297.4	299.3	300.5	300.9	301.0	301.2	303.1	304.5	303.0	299.8	299.1	299.0	299.2	299.5	299.7	300.0	300.0	300.0	299.9	299.7	299.5	299.4	299.5	299.4	299.3	299.5	299.9	299.8	300.1	300.5	300.3	300.0	299.8	299.7	299.4	299.2
296.4	296.5	296.5	296.5	296.4	294.3	292.3	292.6	293.2	293.8	293.8	293.4	294.3	295.4	298.4	301.5	301.0	300.6	301.2	301.4	302.5	302.1	299.5	299.2	299.1	299.1	299.4	299.8	300.0	300.3	300.3	300.2	300.1	300.0	299.9	299.8	299.9	299.8	299.7	299.9	300.0	299.8	300.0	300.1	299.8	299.4	299.2	299.2	299.4	299.2
296.6	296.5	296.2	296.4	296.4	294.5	293.7	293.6	293.4	293.9	293.6	293.9	294.4	295.3	298.5	300.6	299.9	299.7	300.9	301.5	302.1	300.1	299.3	299.2	299.1	299.2	299.6	300.1	300.4	300.4	300.5	300.3	300.2	300.3	300.4	300.3	300.3	300.3	300.3	300.2	300.1	300.0	300.1	300.0	299.6	299.3	298.9	299.0	299.3	299.3
296.8	296.9	295.9	295.9	296.1	295.2	295.2	295.0	294.2	294.2	293.8	293.9	294.1	294.5	296.9	300.2	300.6	300.1	300.8	301.8	301.9	299.8	299.4	299.2	299.2	299.3	299.8	300.3	300.5	300.4	300.5	300.3	300.3	300.4	300.6	300.7	300.8	300.6	300.4	300.1	299.9	300.0	300.1	300.0	299.6	299.4	299.2	299.3	299.5	299.5
296.6	296.8	296.7	296.9	296.2	295.4	294.6	295.1	294.7	294.3	294.3	294.0	294.2	293.8	295.1	298.9	300.2	300.1	301.2	302.0	301.3	300.0	299.6	299.3	299.4	299.6	300.1	300.4	300.5	300.4	300.4	300.4	300.3	300.5	300.6	300.7	300.6	300.4	300.3	299.9	299.6	299.6	299.6	299.8	299.7	299.4	299.4	299.5	299.5	299.4
296.0	296.4	296.9	297.1	295.9	295.1	294.6	294.9	294.2	293.7	294.1	294.2	293.6	293.3	294.5	297.7	297.9	298.5	300.7	301.3	300.8	300.2	299.8	299.7	299.7	300.1	300.5	300.8	300.7	300.6	300.6	300.6	300.6	300.7	300.4	299.9	299.4	299.4	299.9	300.1	299.7	299.3	299.4	300.0	299.9	299.5	299.4	299.4	299.2	299.3
295.7	296.0	296.3	296.4	296.3	295.4	294.5	294.6	294.1	293.8	293.7	292.9	291.9	293.6	295.9	296.8	296.7	297.6	300.0	300.9	300.7	300.5	300.3	300.1	300.3	300.7	300.9	301.1	301.0	301.0	301.0	300.9	300.9	300.7	300.3	299.8	299.5	299.0	299.4	300.2	300.0	299.2	299.4	300.2	299.9	299.3	299.0	299.2	299.3	299.8
295.2	295.3	295.7	296.0	295.8	294.9	294.1	294.4	294.7	294.3	293.7	292.8	292.1	294.3	296.2	296.6	296.8	298.0	299.6	300.5	301.1	300.8	300.6	300.6	300.7	301.0	301.3	301.5	301.4	301.3	301.0	301.0	300.6	300.4	300.2	299.9	299.9	299.6	299.9	300.2	299.6	298.9	299.4	300.2	300.0	299.3	299.0	299.4	299.9	300.4
294.6	294.8	295.3	295.6	295.2	294.4	293.7	293.8	294.8	294.2	293.8	293.9	293.5	294.3	294.6	294.9	296.3	298.9	300.6	301.5	302.3	301.2	300.9	300.9	301.0	301.3	301.6	301.7	301.4	301.1	300.9	300.8	300.3	300.0	300.0	300.0	300.1	300.1	300.2	300.0	299.5	299.1	299.5	300.2	300.2	299.5	299.4	300.0	300.4	300.7
294.5	295.2	295.5	294.8	294.2	294.0	294.2	294.2	294.2	294.4	294.9	294.7	294.5	294.6	293.8	295.3	298.3	300.8	301.7	302.4	301.9	301.3	301.1	301.1	301.3	301.6	301.7	301.3	300.7	300.4	300.6	300.4	300.1	300.0	299.9	300.0	300.2	300.1	299.9	299.7	299.6	299.6	300.2	300.6	300.2	299.5	299.6	300.3	300.7	300.9
294.6	295.7	295.6	294.6	294.2	294.4	294.1	294.4	294.1	294.5	295.4	294.8	295.7	295.9	296.0	298.0	300.0	300.8	301.9	303.6	302.2	301.5	301.2	301.3	301.5	301.7	301.4	300.7	300.0	299.8	299.9	300.1	300.0	299.8	299.8	299.9	299.7	299.5	299.5	299.6	299.8	300.2	300.8	300.7	300.0	299.5	300.0	300.5	300.7	300.8
295.1	295.6	295.4	295.3	295.3	294.7	293.8	293.7	293.9	294.6	295.1	295.1	296.3	297.3	297.6	298.4	299.2	300.4	302.6	304.4	303.5	301.3	301.3	301.4	301.6	301.4	300.6	300.2	299.9	299.7	299.6	299.8	300.0	300.0	299.9	299.5	299.1	298.9	299.3	300.0	300.5	300.8	300.7	300.7	300.0	299.6	300.2	300.7	300.8	300.9
294.7	295.2	296.1	296.9	296.7	295.5	294.2	293.9	294.1	294.6	294.7	295.0	295.5	296.8	297.2	297.1	298.0	299.6	302.1	303.7	303.2	301.7	301.5	301.5	301.2	300.8	300.4	300.4	300.2	300.1	299.9	299.8	300.0	300.2	300.0	299.5	299.3	299.4	300.0	300.6	300.8	300.8	300.5	300.5	300.0	299.7	300.2	300.9	301.1	301.0
294.3	295.3	296.5	297.7	297.7	296.6	295.6	295.2	294.6	294.3	294.6	295.2	295.1	295.9	297.2	297.2	297.6	299.2	301.1	302.0	302.4	302.0	301.7	301.5	300.7	300.4	300.5	300.6	300.4	300.3	299.8	299.6	299.8	300.1	300.0	300.0	300.2	300.3	300.6	300.8	300.8	300.9	300.7	300.3	299.6	299.8	300.6	301.3	301.3	301.2
294.6	295.6	296.7	297.9	297.9	297.0	296.9	296.0	294.5	294.8	295.9	295.5	295.7	296.4	297.7	296.8	297.1	299.0	300.4	300.9	301.1	301.8	301.8	301.3	300.6	300.3	300.5	300.8	300.7	300.6	300.1	299.7	299.5	299.9	300.1	300.5	300.7	300.8	300.8	300.8	300.8	301.0	301.0	300.2	299.2	300.1	301.1	301.5	301.4	301.3
295.2	296.1	296.4	297.1	297.1	296.8	296.6	295.4	295.0	296.5	297.0	295.5	295.9	297.0	297.3	296.4	297.2	298.8	299.8	300.0	300.3	301.5	301.5	300.9	300.2	300.1	300.5	300.9	300.7	300.6	300.0	299.2	298.6	298.6	300.2	300.7	300.6	300.7	300.8	300.8	300.9	301.0	301.1	299.9	299.1	300.5	301.4	301.5	301.3	301.2
295.3	295.9	295.8	296.0	295.9	295.9	295.8	296.1	297.1	297.8	296.6	295.1	295.8	297.4	297.8	297.0	297.2	298.0	299.3	299.8	299.9	300.9	301.1	300.7	300.0	300.0	300.6	300.7	300.3	300.1	299.4	298.6	296.8	297.7	300.4	300.9	300.7	300.5	300.8	300.9	301.0	301.1	300.9	299.7	299.4	300.9	301.5	301.3	301.0	300.8
295.3	295.8	296.4	296.4	296.3	296.4	296.7	297.6	297.7	297.0	296.0	295.1	295.0	296.8	298.2	297.6	297.5	297.5	298.6	299.2	299.6	300.2	300.7	300.7	300.2	300.0	300.3	300.4	300.1	300.1	299.9	298.6	297.1	298.5	301.9	301.9	301.3	300.7	300.8	301.0	301.1	301.2	300.6	299.3	300.0	301.3	301.4	300.9	300.5	300.2
295.9	297.0	297.8	297.8	297.4	297.3	297.5	298.0	297.8	297.4	297.2	297.0	295.7	295.7	296.9	297.3	296.7	296.2	296.5	297.3	299.0	300.1	300.6	300.7	300.2	300.1	300.3	300.3	300.2	300.4	301.6	301.9	300.1	299.1	300.2	300.6	300.4	300.3	300.7	301.0	301.1	301.3	300.5	299.3	300.7	301.5	301.2	300.7	300.2	300.1
297.2	298.1	298.7	298.8	298.3	297.8	297.6	298.2	299.2	299.2	298.4	298.3	297.6	297.1	296.9	297.2	296.5	295.7	296.0	297.2	300.0	301.2	300.9	300.5	299.9	300.2	300.4	300.4	300.8	301.0	302.2	303.5	300.1	297.5	299.4	299.7	299.7	299.8	300.3	300.9	301.2	301.2	300.1	299.5	301.2	301.4	301.0	300.6	300.5	300.8
297.3	297.5	297.2	297.4	297.7	297.6	297.2	297.8	298.9	299.0	298.2	297.9	298.7	298.7	298.4	297.7	296.8	296.8	297.3	298.9	301.2	301.2	300.9	300.5	300.4	300.9	300.7	299.7	300.6	302.8	304.3	301.2	296.0	295.6	299.1	299.5	299.5	299.8	300.2	300.8	301.1	300.3	299.4	299.9	301.1	301.1	300.9	300.7	301.0	301.2
296.4	295.9	295.2	295.3	296.0	296.4	296.8	297.5	297.4	297.4	297.6	297.5	297.8	298.8	299.9	299.3	298.4	298.8	300.1	300.5	301.1	301.2	301.1	300.8	301.0	301.3	301.5	300.2	300.5	303.0	303.0	298.5	295.2	298.3	299.2	299.6	299.7	300.0	300.1	300.4	300.2	299.4	299.4	300.6	300.7	300.8	301.0	301.1	301.2	301.1
296.1	295.4	294.9	294.7	294.9	295.2	296.4	296.7	295.7	295.1	295.4	295.6	296.9	297.9	299.5	300.9	300.3	300.9	301.3	301.4	301.5	301.4	301.3	301.1	301.1	301.2	301.8	300.4	300.3	300.8	299.6	296.5	295.8	299.2	299.9	300.3	300.1	300.2	300.0	300.0	299.8	299.9	300.4	301.1	300.9	301.0	301.1	301.1	300.7	300.3
295.9	295.5	295.2	295.2	295.3	295.4	295.4	295.3	294.6	294.2	294.2	294.5	296.1	297.3	298.6	300.9	301.2	301.4	301.8	301.8	301.9	301.8	301.8	301.6	301.3	301.0	301.1	300.8	300.8	300.2	297.7	295.7	296.7	299.2	300.1	300.8	300.6	300.3	300.1	300.2	300.3	300.9	301.1	301.2	301.2	301.2	300.9	300.4	299.8	299.4
296.1	296.2	296.9	297.3	297.4	296.8	295.8	294.8	293.8	293.8	293.8	294.1	295.7	297.0	298.4	300.4	301.1	301.4	301.6	301.8	301.9	301.9	302.0	301.9	301.6	301.3	301.3	301.5	301.4	299.7	296.6	296.0	297.3	299.4	300.0	300.5	300.6	300.5	300.5	300.9	301.0	301.1	301.2	301.1	301.0	300.7	300.3	299.9	299.5	299.3
297.3	298.0	299.2	299.0	297.6	296.1	294.8	294.0	293.3	293.4	293.4	294.0	295.8	297.2	298.6	299.9	300.5	301.1	301.3	301.5	301.7	301.8	301.9	301.7	301.6	301.6	301.9	301.8	301.6	299.7	297.4	298.0	299.6	300.0	300.0	300.1	300.3	300.4	300.5	300.8	301.0	300.8	300.9	300.9	300.7	300.4	300.0	299.6	299.4	299.4
298.7	299.3	299.4	298.5	296.9	295.8	295.1	294.6	293.9	293.7	294.0	294.9	296.1	297.0	298.2	299.1	299.8	300.6	300.9	301.2	301.3	301.5	301.5	301.3	301.2	302.0	303.4	301.8	301.8	300.5	299.2	300.1	300.4	300.4	300.2	300.0	299.9	299.6	299.9	300.6	300.6	300.2	300.6	300.7	300.4	300.0	299.5	299.3	299.4	299.5
299.4	299.7	299.2	298.3	297.5	297.2	297.1	296.4	295.3	295.0	295.9	296.8	297.1	297.2	297.6	298.3	299.0	299.8	300.0	300.6	300.7	300.9	300.8	300.7	300.6	304.4	304.9	301.6	301.7	301.2	300.1	300.6	300.5	300.3	300.4	300.2	299.8	299.2	299.2	300.1	300.3	300.0	300.0	299.9	299.6	299.3	299.1	299.2	299.4	299.4
300.7	300.4	299.6	299.0	298.7	298.3	297.9	297.6	297.5	298.0	299.0	299.6	299.2	298.7	298.1	298.2	298.8	299.3	299.4	299.9	299.9	300.1	300.1	300.2	300.2	304.9	304.6	299.8	300.2	301.0	300.2	300.1	300.2	300.4	300.5	300.4	300.0	299.3	299.0	299.5	299.9	299.8	299.3	298.8	298.7	298.8	299.0	299.2	299.2	299.1
302.4	301.6	301.2	300.9	300.1	298.8	298.0	298.3	299.5	300.7	301.4	301.7	301.6	300.9	299.6	298.7	298.9	299.0	299.0	299.2	299.2	299.4	299.5	299.6	300.2	302.9	306.1	300.0	298.9	300.5	300.8	300.0	299.9	300.2	300.4	300.4	300.1	299.6	299.1	299.1	299.2	299.2	298.6	298.5	298.5	298.6	298.8	298.9	298.7	298.7
303.1	302.8	302.9	302.9	301.4	299.8	299.5	299.7	300.7	301.9	302.4	302.7	303.0	302.5	301.4	299.0	298.9	298.8	298.7	298.7	298.8	298.8	298.9	299.0	299.8	303.1	308.5	302.0	298.9	300.4	300.6	299.6	299.6	299.8	300.1	300.1	300.0	299.5	298.9	298.5	298.4	298.3	298.0	298.1	298.4	298.5	298.4	298.3	298.3	298.3
303.4	303.0	303.2	303.2	302.2	301.6	301.5	300.5	300.3	301.5	302.4	302.5	302.7	302.2	299.4	299.2	299.1	299.0	298.8	298.6	298.5	298.5	298.5	298.4	298.5	300.2	307.2	303.0	300.5	302.2	299.7	299.4	299.4	299.5	299.7	299.7	299.5	299.1	298.6	298.1	297.7	297.6	297.6	297.7	298.0	298.1	297.9	297.7	297.9	298.0
304.6	303.7	302.7	302.2	301.7	301.2	300.4	299.2	298.9	301.3	302.0	299.4	299.2	299.2	299.3	299.6	299.6	299.3	298.9	298.7	298.5	298.3	298.1	297.9	297.9	298.0	299.7	300.4	299.5	300.3	299.5	299.1	299.0	299.0	299.2	299.1	298.9	298.7	298.5	298.0	297.5	297.4	297.5	297.6	297.6	297.6	297.3	297.1	297.3	297.4
305.0	303.9	302.7	301.8	300.6	299.5	298.6	297.6	298.0	300.8	301.9	299.3	298.9	299.2	299.5	299.5	299.5	299.4	298.9	298.7	298.5	298.2	297.8	297.4	297.5	297.7	298.3	299.1	299.6	299.5	299.0	298.8	298.6	298.6	298.7	298.7	298.5	298.4	298.3	297.8	297.5	297.4	297.4	297.4	297.2	297.0	296.7	296.6	296.7	296.7
305.0	304.9	303.8	303.0	301.1	299.4	298.0	297.3	298.0	300.7	302.0	299.3	299.0	299.0	299.0	299.1	298.9	298.7	298.3	298.2	298.1	297.9	297.5	297.5	297.4	297.6	298.1	298.7	299.1	298.8	298.5	298.2	298.1	298.2	298.2	298.1	297.8	297.6	297.5	297.3	297.2	297.2	297.1	296.9	296.6	296.3	296.0	295.9	296.0	295.9
306.8	306.6	305.5	304.3	301.4	299.4	298.7	299.0	299.2	300.9	301.9	299.2	298.3	298.3	298.4	298.6	298.4	298.2	297.9	297.8	297.9	298.0	297.7	297.7	297.8	297.9	298.1	298.4	298.4	298.2	298.0	297.7	297.7	297.6	297.4	297.3	297.2	297.1	297.0	296.9	297.0	296.9	296.7	296.4	296.0	295.6	295.3	295.3	295.4	295.5
308.7	307.6	305.5	303.6	300.4	297.8	298.6	300.7	300.8	301.1	300.8	298.6	297.7	297.8	298.2	298.3	298.2	298.0	297.8	297.8	297.8	297.8	298.0	298.1	298.1	298.0	297.8	297.9	297.9	297.8	297.6	297.4	297.1	297.0	296.9	296.7	296.9	296.9	296.9	296.9	296.8	296.5	296.1	295.6	295.2	294.8	294.7	294.9	295.1	295.3
310.1	308.4	305.6	302.3	297.8	293.8	295.8	300.0	301.0	299.2	298.3	297.7	297.2	297.4	297.9	297.9	297.8	297.6	297.6	297.4	297.3	297.3	297.5	297.6	297.6	297.3	297.0	297.1	297.0	297.0	296.7	296.5	296.4	296.4	296.3	296.2	296.3	296.5	296.8	296.7	296.5	296.0	295.5	294.9	294.5	294.3	294.3	294.5	294.8	294.8
310.3	308.8	306.1	302.1	297.0	294.0	296.6	299.6	300.2	297.7	297.5	297.5	297.2	297.2	297.4	297.2	297.2	297.1	297.1	297.0	296.9	297.1	296.8	296.5	296.4	296.2	296.0	296.2	296.0	296.0	295.8	295.8	296.0	295.9	295.8	295.7	295.7	296.0	296.2	296.2	296.0	295.6	295.1	294.6	294.2	293.9	293.9	294.1	294.3	294.3
309.8	308.7	306.3	303.0	299.1	298.3	300.3	300.1	297.1	297.1	297.6	297.3	297.0	297.0	297.0	296.9	297.0	296.9	296.9	296.8	296.7	296.7	296.5	296.3	296.0	295.6	295.3	295.4	295.3	295.4	295.4	295.5	295.7	295.5	295.4	295.1	295.0	295.4	295.6	295.5	295.3	295.1	294.8	294.3	293.9	293.6	293.5	293.6	293.8	293.9
309.0	309.2	307.5	305.1	302.5	301.2	300.3	299.8	297.5	297.4	297.6	297.2	297.1	296.9	296.8	296.8	296.8	296.8	296.6	296.4	296.3	296.1	296.0	295.9	295.7	295.2	294.8	294.9	295.0	295.1	295.1	295.1	295.1	294.9	294.5	294.3	294.3	294.8	294.9	294.6	294.5	294.4	294.3	293.9	293.6	293.3	293.2	293.4	293.6	293.7
308.9	310.0	309.3	307.2	304.5	301.7	297.2	297.3	297.2	297.0	297.1	297.0	296.9	296.8	296.8	296.7	296.6	296.6	296.3	296.0	295.8	295.6	295.5	295.3	295.0	294.7	294.4	294.4	294.5	294.6	294.7	294.6	294.4	294.2	293.9	293.9	294.1	294.3	294.2	294.0	293.9	293.9	293.8	293.6	293.4	293.2	293.0	293.2	293.5	293.5
308.5	308.9	309.4	307.6	304.4	297.7	296.7	296.4	296.4	296.3	296.4	296.3	296.3	296.2	296.2	296.1	296.2	296.1	295.9	295.6	295.4	295.3	295.2	295.0	294.7	294.4	294.1	293.9	293.9	294.1	294.2	294.2	294.0	294.0	294.1	294.1	293.9	293.7	293.7	293.6	293.6	293.5	293.4	293.4	293.3	293.0	292.8	293.0	293.2	293.2
305.6	305.3	305.9	299.4	298.0	296.5	295.8	295.5	295.5	295.5	295.6	295.6	295.6	295.6	295.6	295.6	295.6	295.7	295.5	295.2	295.0	295.0	294.9	294.7	294.5	294.3	294.0	293.8	293.8	293.9	294.0	294.0	293.9	294.1	294.2	294.0	293.6	293.4	293.3	293.3	293.3	293.2	293.2	293.2	293.1	292.7	292.5	292.7	292.8	292.8
297.4	296.3	296.5	297.0	296.3	295.6	295.1	294.9	294.8	294.8	294.8	295.0	295.2	295.3	295.4	295.4	295.3	295.2	295.0	294.8	294.7	294.6	294.6	294.4	294.2	294.1	293.9	293.7	293.7	293.7	293.7	293.7	293.6	293.6	293.7	293.6	293.3	293.1	293.1	293.1	293.1	293.1	293.0	293.0	292.9	292.4	292.2	292.2	292.4	292.4
296.4	296.2	296.2	296.1	295.7	295.4	295.1	294.7	294.4	294.3	294.2	294.3	294.5	294.7	294.8	294.9	294.7	294.5	294.5	294.4	294.3	294.3	294.3	294.0	293.8	293.7	293.6	293.6	293.5	293.3	293.3	293.2	293.1	293.0	293.0	292.9	292.8	292.7	292.7	292.8	293.0	293.0	292.9	292.7	292.5	292.2	291.8	291.7	291.8	291.8
296.3	295.9	295.7	295.7	295.7	295.6	295.3	294.9	294.4	294.0	293.6	293.6	293.8	293.9	294.1	294.2	294.1	294.1	294.1	294.1	294.1	294.0	293.9	293.7	293.5	293.4	293.4	293.3	293.2	293.0	292.8	292.7	292.6	292.5	292.4	292.5	292.4	292.3	292.3	292.4	292.7	292.8	292.6	292.3	292.1	292.0	291.5	291.3	291.4	291.3
295.3	295.3	295.4	295.5	295.6	295.6	295.4	295.1	294.6	294.0	293.5	293.3	293.2	293.4	293.7	293.8	293.8	293.8	293.8	293.7	293.7	293.6	293.5	293.3	293.1	293.1	293.1	293.0	292.9	292.7	292.5	292.3	292.1	291.9	291.9	292.0	292.1	292.0	291.9	292.1	292.3	292.6	292.5	292.1	291.9	291.7	291.3	291.1	291.1	290.9
294.1	294.0	294.2	294.6	295.1	295.5	295.5	295.0	294.4	294.1	293.6	293.2	293.0	293.1	293.6	293.8	293.7	293.6	293.5	293.2	293.3	293.4	293.2	293.0	292.9	292.7	292.6	292.5	292.5	292.3	292.1	292.1	291.8	291.6	291.5	291.7	291.8	291.6	291.6	291.6	291.8	292.0	292.2	292.1	291.8	291.5	291.2	291.1	290.9	290.7
293.2	293.2	293.4	294.0	294.6	294.9	294.8	294.1	294.1	294.2	293.7	293.1	292.8	293.0	293.3	293.7	293.7	293.6	293.0	292.5	292.8	293.1	293.0	292.9	292.7	292.6	292.4	292.3	292.1	291.7	291.6	291.8	291.7	291.4	291.3	291.4	291.4	291.4	291.4	291.3	291.2	291.3	291.4	291.5	291.4	291.1	290.9	290.8	290.6	290.3
293.5	292.9	292.7	292.9	293.6	293.9	293.8	293.4	293.8	294.0	293.6	293.0	292.6	292.5	292.5	292.8	293.2	293.0	292.2	291.6	292.2	292.6	292.7	292.6	292.5	292.4	292.3	292.2	291.9	291.3	291.1	291.4	291.6	291.4	291.3	291.2	291.1	291.0	291.2	291.2	291.1	291.0	291.0	291.0	290.9	290.7	290.6	290.4	290.2	289.8
293.1	293.0	292.8	292.3	292.1	292.2	292.2	292.4	292.9	293.1	292.7	292.3	291.9	291.7	291.7	292.1	292.3	291.8	291.0	290.7	291.1	291.6	291.8	291.7	291.5	291.5	291.6	291.8	291.7	291.0	290.6	290.8	291.2	291.4	291.3	291.1	291.1	291.0	290.9	290.9	290.8	290.7	290.7	290.7	290.5	290.3	290.2	290.1	289.8	289.4
291.9	292.1	292.1	291.6	291.0	290.9	291.0	291.4	291.7	291.5	291.3	291.1	291.0	291.1	291.3	291.3	290.8	289.8	289.6	289.6	289.8	289.9	289.8	289.7	289.7	289.9	290.2	290.8	291.1	290.6	290.0	289.9	290.2	290.2	290.1	290.2	290.5	290.2	289.9	289.8	289.8	290.0	290.4	290.5	290.4	290.2	290.0	289.7	289.4	289.1
291.0	291.1	291.0	290.7	290.3	290.1	290.0	290.2	290.5	290.3	290.0	289.8	290.0	290.3	290.3	289.8	288.9	288.1	288.0	288.0	288.1	288.0	287.8	287.6	287.9	288.5	288.6	288.6	288.9	289.1	288.6	288.1	287.9	287.2	287.1	287.9	288.7	288.4	288.1	288.2	288.2	288.8	289.6	290.1	290.2	290.0	289.6	289.3	289.2	289.1
289.6	289.5	289.5	289.6	289.6	289.4	289.2	289.1	289.3	289.4	288.9	288.6	288.6	288.7	288.6	288.1	287.2	286.5	286.0	286.0	286.1	286.1	285.9	285.8	286.1	286.5	286.3	285.2	285.2	285.5	285.5	285.3	285.4	284.6	284.7	285.7	286.3	286.4	286.7	287.5	287.4	287.6	288.3	289.1	289.6	289.4	288.6	288.3	288.4	288.7
288.6	288.3	288.3	288.4	288.7	288.7	288.2	287.8	288.0	288.5	288.1	287.5	287.1	286.8	286.5	286.2	285.6	284.9	284.4	284.1	284.1	284.0	283.9	283.8	284.0	284.1	283.7	282.8	282.5	282.7	282.8	282.8	282.8	282.5	282.8	283.3	283.6	283.9	284.6	285.9	286.4	286.4	286.8	287.7	288.5	288.4	287.7	287.2	287.3	287.8
287.9	287.9	287.8	287.4	287.3	287.1	286.7	286.6	287.1	287.6	287.3	286.4	285.7	285.3	285.1	284.8	284.2	283.6	283.1	282.7	282.4	282.2	282.1	282.1	282.0	281.9	281.6	281.2	281.1	281.1	281.2	281.2	281.3	281.3	281.5	281.6	281.8	282.0	282.6	283.3	283.9	284.5	285.4	286.7	287.6	287.9	287.3	286.6	286.6	287.2
287.1	287.2	287.0	286.5	286.0	285.7	285.6	285.9	286.4	286.5	286.2	285.5	284.8	284.3	284.0	283.6	283.0	282.4	282.0	281.6	281.2	280.8	280.7	280.6	280.5	280.3	280.1	279.9	279.8	279.8	279.8	279.9	280.2	280.4	280.6	280.7	280.7	280.9	281.1	281.3	281.7	282.4	283.7	285.4	286.6	287.1	286.6	285.9	286.3	286.9
286.1	285.9	285.8	285.7	285.3	285.1	285.1	285.4	285.4	285.3	285.0	284.6	284.2	283.8	283.4	282.9	282.3	281.7	281.2	280.7	280.3	280.0	279.8	279.7	279.5	279.3	279.1	278.9	278.8	278.8	278.8	278.8	279.0	279.4	279.6	279.8	279.9	280.1	280.2	280.4	280.7	281.1	281.8	283.3	284.5	285.1	284.9	284.3	285.0	285.8
284.9	284.7	284.8	285.0	284.9	284.7	284.7	284.9	284.9	284.5	284.2	284.0	283.9	283.6	283.2	282.7	282.2	281.5	280.8	280.2	279.8	279.5	279.2	279.1	278.9	278.8	278.6	278.4	278.3	278.2	278.0	278.0	278.0	278.2	278.5	278.7	279.0	279.3	279.5	279.7	280.2	280.5	280.8	281.3	281.9	282.3	282.4	282.4	282.9	283.6
283.8	283.8	284.0	284.2	284.4	284.2	284.2	284.2	284.3	284.0	283.7	283.6	283.5	283.5	283.2	282.7	282.2	281.6	280.8	280.2	279.7	279.3	278.9	278.7	278.6	278.5	278.3	278.1	277.9	277.7	277.5	277.3	277.3	277.3	277.5	277.7	277.9	278.1	278.4	278.8	279.3	279.6	279.9	280.1	280.3	280.4	280.5	280.7	281.2	281.7
282.4	282.8	283.1	283.4	283.6	283.7	283.8	283.9	283.8	283.5	283.3	283.1	283.0	282.9	282.5	282.2	281.8	281.4	280.8	280.2	279.7	279.3	278.9	278.6	278.4	278.2	278.1	278.0	277.7	277.4	277.1	276.9	276.8	276.7	276.8	276.9	277.0	277.1	277.3	277.5	277.9	278.3	278.8	279.1	279.4	279.4	279.3	279.5	279.8	280.1
280.3	280.9	281.5	282.1	282.7	283.1	283.4	283.6	283.6	283.5	283.2	282.8	282.4	282.1	281.8	281.5	281.3	281.1	280.6	280.1	279.7	279.3	278.8	278.5	278.3	278.1	278.0	277.9	277.7	277.4	277.0	276.7	276.5	276.4	276.4	276.4	276.5	276.6	276.7	276.7	276.9	277.2	277.6	277.9	278.2	278.3	278.4	278.6	278.7	278.7
278.6	279.0	279.6	280.3	281.0	281.6	282.1	282.5	282.8	283.0	282.8	282.3	281.8	281.5	281.4	281.3	281.2	280.9	280.6	280.2	279.8	279.4	279.0	278.5	278.3	278.1	278.0	278.0	277.8	277.5	277.1	276.8	276.5	276.4	276.3	276.4	276.5	276.6	276.5	276.5	276.5	276.6	276.7	276.8	277.0	277.1	277.3	277.5	277.7	277.8
277.9	278.1	278.2	278.5	279.1	279.7	280.1	280.5	281.2	281.7	281.8	281.6	281.3	281.2	281.2	281.2	281.0	280.8	280.5	280.2	279.9	279.5	279.1	278.7	278.6	278.4	278.3	278.1	277.8	277.5	277.2	276.9	276.6	276.5	276.4	276.5	276.6	276.6	276.6	276.4	276.3	276.3	276.3	276.2	276.3	276.3	276.5	276.6	276.8	276.9
277.3	277.4	277.3	277.3	277.6	277.9	278.2	278.7	279.7	280.2	280.5	280.4	280.4	280.4	280.4	280.5	280.5	280.4	280.3	280.1	279.8	279.5	279.2	278.9	278.8	278.7	278.5	278.3	278.0	277.7	277.4	277.1	277.0	276.8	276.7	276.7	276.8	276.8	276.7	276.5	276.4	276.3	276.2	276.1	276.1	276.1	276.2	276.2	276.3	276.4
276.6	276.7	276.6	276.7	276.9	277.1	277.4	277.9	278.6	278.9	279.0	279.1	279.3	279.4	279.5	279.7	279.7	279.7	279.6	279.5	279.3	279.1	278.9	278.8	278.7	278.6	278.5	278.3	278.1	277.9	277.7	277.5	277.3	277.2	277.0	277.0	276.9	276.9	276.7	276.6	276.4	276.3	276.1	276.0	276.0	276.0	276.0	276.1	276.1	276.1
275.8	276.0	276.1	276.4	276.6	276.9	277.2	277.5	277.9	278.0	278.1	278.2	278.3	278.4	278.5	278.7	278.8	278.8	278.8	278.7	278.6	278.5	278.4	278.3	278.2	278.1	278.0	278.0	277.9	277.8	277.7	277.6	277.5	277.4	277.3	277.1	277.0	276.8	276.7	276.5	276.3	276.1	275.9	275.9	275.9	275.9	275.9	275.9	275.9	275.9
274.5	274.9	275.3	275.7	276.2	276.6	276.9	277.1	277.3	277.4	277.5	277.6	277.6	277.7	277.8	278.0	278.1	278.1	278.2	278.2	278.1	278.0	277.9	277.8	277.7	277.6	277.5	277.5	277.5	277.5	277.5	277.5	277.4	277.3	277.1	277.0	276.8	276.6	276.5	276.2	276.1	275.9	275.8	275.8	275.8	275.8	275.8	275.8	275.7	275.7
273.4	273.7	274.1	274.7	275.3	275.7	276.0	276.2	276.4	276.7	276.9	277.1	277.1	277.1	277.3	277.4	277.5	277.6	277.7	277.7	277.7	277.7	277.6	277.5	277.4	277.3	277.2	277.0	276.9	277.0	277.0	277.0	276.9	276.8	276.6	276.5	276.3	276.2	276.1	275.9	275.8	275.7	275.7	275.7	275.7	275.7	275.7	275.7	275.6	275.6
272.4	272.8	273.2	273.7	274.2	274.6	274.9	275.2	275.4	275.7	275.9	276.2	276.3	276.4	276.5	276.7	276.8	277.0	277.1	277.2	277.3	277.3	277.3	277.2	277.1	277.0	276.8	276.7	276.6	276.5	276.5	276.5	276.3	276.1	275.9	275.7	275.6	275.5	275.5	275.5	275.5	275.5	275.5	275.5	275.5	275.5	275.5	275.5	275.5	275.5
271.7	272.0	272.4	272.8	273.2	273.5	273.8	274.1	274.4	274.7	275.0	275.2	275.4	275.5	275.6	275.8	276.0	276.2	276.4	276.5	276.7	276.8	276.7	276.7	276.6	276.6	276.6	276.5	276.5	276.4	276.3	276.1	275.8	275.5	275.1	274.9	274.8	274.8	274.9	274.9	275.0	275.0	275.1	275.2	275.2	275.3	275.3	275.4	275.4	275.5
271.6	271.7	271.9	272.2	272.5	272.7	273.0	273.2	273.4	273.6	273.9	274.1	274.4	274.6	274.8	275.0	275.2	275.3	275.5	275.7	275.8	275.9	275.9	275.9	276.0	276.2	276.2	276.3	276.3	276.2	276.1	275.8	275.4	274.9	274.6	274.4	274.3	274.3	274.3	274.4	274.5	274.6	274.8	274.9	275.1	275.2	275.2	275.3	275.4	275.5
271.9	271.9	272.0	272.1	272.3	272.5	272.7	272.8	272.9	273.0	273.2	273.4	273.6	273.9	274.1	274.3	274.5	274.6	274.7	274.8	274.8	274.9	275.1	275.2	275.5	275.7	275.9	276.0	276.0	275.9	275.7	275.3	274.9	274.5	274.3	274.1	274.1	274.0	274.0	274.0	274.2	274.4	274.6	274.8	275.0	275.1	275.2	275.2	275.3	275.3
272.1	272.1	272.1	272.2	272.3	272.5	272.6	272.7	272.8	272.8	272.9	273.0	273.1	273.3	273.5	273.8	273.9	274.0	274.1	274.1	274.2	274.3	274.4	274.6	274.9	275.1	275.3	275.4	275.4	275.2	274.9	274.6	274.3	274.1	274.0	273.9	273.8	273.8	273.8	273.9	274.1	274.3	274.5	274.6	274.8	274.9	275.0	275.0	275.0	275.0
272.1	272.1	272.1	272.2	272.3	272.4	272.5	272.6	272.7	272.8	272.9	272.9	272.9	273.0	273.1	273.3	273.4	273.5	273.6	273.7	273.7	273.7	273.8	274.0	274.2	274.3	274.5	274.4	274.4	274.2	274.0	273.9	273.8	273.8	273.7	273.7	273.7	273.7	273.8	273.9	274.0	274.2	274.4	274.4	274.5	274.6	274.7	274.7	274.7	274.7
272.1	272.2	272.2	272.3	272.4	272.5	272.6	272.7	272.7	272.8	272.8	272.9	272.9	272.9	272.9	273.0	273.1	273.2	273.2	273.2	273.3	273.3	273.4	273.5	273.6	273.7	273.8	273.8	273.7	273.6	273.6	273.6	273.6	273.6	273.7	273.7	273.7	273.7	273.8	273.9	274.0	274.1	274.2	274.2	274.3	274.3	274.3	274.3	274.3	274.3
272.3	272.4	272.4	272.4	272.5	272.6	272.7	272.8	272.8	272.8	272.8	272.8	272.8	272.8	272.8	272.8	272.8	272.9	273.0	273.1	273.1	273.1	273.1	273.3	273.4	273.5	273.5	273.6	273.6	273.5	273.5	273.5	273.5	273.6	273.6	273.7	273.7	273.8	273.8	273.9	273.9	274.0	274.0	274.0	274.0	274.0	274.0	274.1	274.0	274.0
272.6	272.6	272.7	272.7	272.7	272.8	272.8	272.8	272.8	272.7	272.7	272.7	272.8	272.8	272.8	272.8	272.8	272.8	272.9	272.9	272.9	273.0	273.1	273.2	273.3	273.3	273.4	273.4	273.4	273.4	273.4	273.5	273.6	273.6	273.7	273.7	273.8	273.8	273.8	273.8	273.8	273.8	273.9	273.8	273.8	273.8	273.8	273.8	273.8	273.8
272.5	272.6	272.6	272.6	272.7	272.7	272.7	272.8	272.8	272.8	272.9	272.8	272.8	272.8	272.8	272.8	272.8	272.8	272.8	272.9	272.9	272.9	273.0	273.0	273.1	273.1	273.2	273.2	273.3	273.3	273.4	273.5	273.5	273.6	273.6	273.6	273.6	273.6	273.7	273.7	273.7	273.7	273.7	273.7	273.7	273.7	273.6	273.6	273.6	273.6
272.5	272.5	272.5	272.6	272.6	272.6	272.6	272.7	272.8	272.8	272.8	272.8	272.7	272.7	272.7	272.6	272.6	272.7	272.7	272.8	272.8	272.8	272.9	272.9	273.0	273.0	273.1	273.2	273.3	273.3	273.4	273.4	273.5	273.5	273.5	273.5	273.5	273.5	273.6	273.6	273.6	273.6	273.5	273.5	273.5	273.5	273.5	273.4	273.4	273.4
272.5	272.5	272.5	272.6	272.6	272.6	272.6	272.6	272.6	272.6	272.6	272.5	272.5	272.4	272.4	272.5	272.5	272.6	272.6	272.7	272.8	272.8	272.8	272.8	272.9	272.9	273.0	273.1	273.2	273.3	273.3	273.3	273.3	273.4	273.4	273.4	273.5	273.5	273.5	273.5	273.5	273.5	273.5	273.4	273.4	273.4	273.3	273.3	273.2	273.2
272.4	272.4	272.4	272.4	272.5	272.5	272.6	272.6	272.5	272.4	272.3	272.2	272.2	272.2	272.3	272.3	272.5	272.6	272.6	272.7	272.7	272.8	272.8	272.8	272.8	272.9	273.0	273.1	273.1	273.2	273.2	273.3	273.3	273.3	273.4	273.4	273.4	273.4	273.4	273.4	273.3	273.3	273.2	273.2	273.2	273.1	273.1	273.1	273.1	273.0
272.3	272.3	272.3	272.4	272.4	272.4	272.4	272.4	272.4	272.3	272.2	272.2	272.2	272.2	272.3	272.4	272.5	272.6	272.7	272.7	272.7	272.7	272.7	272.7	272.8	272.9	272.9	273.0	273.1	273.1	273.1	273.1	273.1	273.1	273.1	273.1	273.1	273.0	273.0	273.0	272.9	272.9	272.9	272.9	272.9	272.8	272.8	272.9	272.9	272.9
272.3	272.3	272.4	272.4	272.4	272.4	272.4	272.3	272.3	272.2	272.2	272.2	272.2	272.2	272.3	272.4	272.5	272.6	272.6	272.6	272.6	272.6	272.7	272.7	272.8	272.9	272.9	272.9	272.9	272.9	272.8	272.8	272.7	272.7	272.7	272.7	272.7	272.7	272.7	272.8	272.8	272.8	273.1	273.4	273.3	273.3	273.3	273.4	273.3	273.3
272.3	272.4	272.4	272.4	272.4	272.3	272.3	272.2	272.2	272.1	272.2	272.2	272.2	272.3	272.3	272.4	272.4	272.5	272.5	272.5	272.5	272.6	272.6	272.6	272.6	272.7	272.6	272.6	272.5	272.5	272.5	272.4	272.4	272.4	272.4	272.4	272.3	272.3	272.3	272.4	272.7	272.9	273.4	273.9	274.0	274.1	274.1	274.1	274.0	273.9
272.3	272.3	272.3	272.3	272.3	272.2	272.2	272.2	272.2	272.2	272.2	272.3	272.3	272.3	272.2	272.3	272.3	272.3	272.3	272.3	272.4	272.4	272.4	272.4	272.4	272.4	272.4	272.5	272.7	272.9	273.1	273.2	273.2	273.3	273.1	272.6	272.1	270.8	269.9	269.3	269.6	270.6	273.0	273.4	273.6	273.7	273.8	273.8	273.7	273.6
272.5	272.5	272.6	272.6	272.7	272.8	272.9	273.0	273.1	273.2	273.2	273.3	273.2	273.1	272.9	272.6	272.4	272.4	272.3	272.4	272.6	272.8	273.0	273.1	273.2	273.2	273.4	273.5	273.7	273.9	274.2	274.4	274.4	274.3	273.0	272.0	271.0	269.1	267.4	267.1	267.3	268.6	270.1	272.5	273.0	273.2	273.3	273.4	273.4	273.4
273.6	273.7	273.8	273.9	273.9	274.0	274.0	274.1	274.1	274.2	274.2	274.2	274.1	274.0	273.9	273.7	273.6	273.6	273.7	273.8	274.0	274.2	274.2	274.2	274.0	273.8	273.6	273.4	273.5	272.9	272.9	273.0	272.5	271.6	270.5	268.9	267.6	266.1	264.6	264.8	265.1	266.2	267.6	268.5	268.7	269.0	269.5	270.1	270.3	270.6
274.7	274.7	274.7	274.7	274.6	274.6	274.5	274.4	274.4	274.3	274.2	274.2	274.2	274.2	274.3	274.4	274.6	274.7	274.9	274.9	274.9	274.7	274.4	273.7	271.2	270.0	269.0	268.0	268.5	268.8	269.1	269.3	269.0	268.1	267.0	265.3	263.7	262.9	262.1	262.4	262.9	263.4	263.9	264.2	264.4	264.5	265.0	265.4	265.6	265.9
274.9	274.9	274.9	274.9	274.8	274.8	274.7	274.6	274.5	274.3	274.0	273.9	273.5	273.5	273.7	274.4	274.8	275.2	275.2	274.9	273.6	271.6	271.0	269.6	267.7	266.1	265.0	263.9	263.9	263.9	264.1	264.5	264.6	264.1	263.5	262.5	261.4	260.6	260.0	259.7	259.8	259.8	259.8	259.7	259.6	259.7	259.9	260.2	260.5	260.8
275.1	275.2	275.3	275.3	275.3	275.2	275.1	275.0	274.2	273.9	273.5	272.7	272.0	272.0	271.9	272.1	272.9	273.6	274.2	274.1	272.7	270.8	269.1	267.1	265.0	263.5	262.5	261.4	261.2	260.9	260.9	261.1	261.2	260.9	260.6	260.0	259.2	258.5	257.9	257.3	256.9	256.6	256.3	256.3	256.2	256.3	256.6	256.9	257.4	258.0
[truncated: 150 more columns]
