# Supplementary material for: Temperature Field Data Reconstruction Using the Sparse Low-Rank Matrix Completion Method
Source: Hindawi journal article supplement (doi:10.1155/2019/3676182), 2019-11-03
Supplement: f1 [file 3676182.f1.zip › data/ERA Interim/t2m-2014010118.txt]

264.2	264.3	264.5	264.3	264.0	263.6	263.3	263.0	262.4	261.8	261.2	260.6	260.1	259.7	259.3	258.8	258.4	258.0	257.6	257.2	256.8	256.4	255.9	255.4	255.0	254.6	254.3	253.9	253.3	252.8	252.2	251.6	251.1	250.5	250.1	249.7	249.3	248.9	248.4	248.1	247.9	247.6	247.4	247.3	247.3	247.4	247.4	247.5	247.2	247.0
265.4	265.0	264.7	264.3	263.9	263.5	263.1	262.7	262.3	261.9	261.5	261.0	260.6	260.3	259.9	259.5	259.1	258.8	258.4	258.0	258.1	258.2	258.3	258.4	258.3	258.2	258.2	258.1	257.3	256.4	255.6	254.8	254.1	253.3	252.6	251.8	251.5	251.1	250.7	250.3	250.6	250.9	251.3	251.6	251.8	252.1	252.3	252.6	252.7	252.9
265.9	265.4	265.1	265.0	265.0	264.9	264.8	264.5	264.2	263.8	263.4	263.0	262.5	262.0	261.6	261.2	261.1	261.0	260.9	260.9	261.8	262.8	263.8	264.8	264.9	265.0	265.0	265.0	264.5	264.0	263.4	262.8	261.6	260.4	259.2	258.0	257.9	257.7	257.6	257.5	258.1	258.6	259.2	259.8	259.8	259.9	260.1	260.2	260.3	260.5
267.9	267.4	267.4	267.7	268.1	268.5	268.5	268.4	268.3	268.1	267.7	267.4	267.0	266.7	266.5	266.3	266.1	266.0	266.0	266.0	266.1	266.2	266.3	266.5	266.6	266.7	266.7	266.7	266.7	266.5	266.3	266.0	265.8	265.5	265.2	264.9	264.5	264.2	263.9	263.6	263.4	263.2	263.0	262.9	262.7	262.7	262.7	262.6	262.6	262.7
270.0	269.9	269.9	269.9	269.8	269.8	269.7	269.6	269.5	269.3	269.1	268.8	268.5	268.3	268.1	268.0	267.9	268.0	267.9	267.9	267.9	268.0	268.0	268.0	267.9	267.8	267.7	267.6	267.3	267.0	266.7	266.5	266.3	266.1	265.8	265.5	265.2	264.9	264.7	264.6	264.5	264.4	264.2	264.1	263.8	263.3	262.8	262.2	262.1	262.0
271.0	270.9	270.9	270.9	270.8	270.8	270.7	270.7	270.5	270.4	270.3	270.1	269.8	269.6	269.5	269.4	269.4	269.4	269.3	269.2	269.1	269.0	268.9	268.7	268.6	268.4	268.1	267.9	267.6	267.4	267.1	266.9	266.6	266.4	266.2	266.0	265.8	265.6	265.4	265.2	265.1	264.6	263.9	263.3	262.7	262.0	256.4	255.6	254.6	253.8
272.0	272.0	272.0	271.9	271.8	271.7	271.5	271.4	271.2	271.0	270.9	270.7	270.5	270.3	270.2	270.1	270.0	269.8	269.6	269.4	269.2	269.1	268.9	268.8	268.6	268.3	268.1	267.9	267.7	267.6	267.5	267.3	267.0	266.8	266.5	266.4	266.4	266.3	265.8	265.1	264.3	263.5	262.8	257.6	256.6	254.9	253.5	252.4	251.3	250.9
272.9	272.7	272.6	272.5	272.2	272.0	271.7	271.4	271.2	270.9	270.8	270.6	270.5	270.4	270.3	270.2	270.0	269.7	269.5	269.3	269.1	269.0	268.8	268.7	268.5	268.4	268.2	268.0	267.8	267.7	267.5	267.3	267.0	266.7	266.5	266.4	266.2	265.4	264.3	263.0	262.5	257.3	256.5	256.1	255.4	251.0	250.2	249.4	248.9	248.4
273.4	273.3	273.1	273.0	272.7	272.4	272.1	271.9	271.7	271.5	271.2	270.9	270.7	270.5	270.3	270.1	269.9	269.8	269.7	269.5	269.3	269.1	268.9	268.8	268.6	268.5	268.3	268.2	267.9	267.7	267.4	267.3	267.2	267.2	266.6	266.0	265.4	264.4	262.8	259.5	254.0	252.5	251.2	251.1	249.8	249.7	248.7	247.8	246.8	246.3
273.7	273.6	273.4	273.2	273.0	272.8	272.7	272.5	272.3	272.1	271.9	271.6	271.3	271.1	271.0	270.9	270.8	270.6	270.4	270.1	269.8	269.5	269.2	268.9	268.6	268.4	268.2	268.1	268.0	267.8	267.7	267.6	267.4	267.2	266.5	264.9	263.3	262.2	255.1	254.2	253.6	252.2	250.1	249.6	249.2	248.5	247.3	246.2	245.9	245.7
272.9	272.9	272.8	272.8	272.8	272.8	272.8	272.9	272.7	272.5	272.3	272.1	271.9	271.8	271.8	271.7	271.4	271.1	270.9	270.6	270.3	269.9	269.5	269.1	268.7	268.3	268.0	268.0	268.0	267.9	267.9	267.8	267.1	266.4	265.6	264.2	255.9	254.3	252.4	250.7	250.4	249.9	248.5	248.2	247.8	247.3	246.8	246.2	246.5	246.7
271.0	270.8	270.6	270.6	270.6	270.8	271.0	271.2	271.6	272.0	272.2	272.2	272.1	272.0	271.7	271.5	271.4	271.2	271.0	270.6	270.3	269.9	269.6	269.2	268.8	268.4	268.1	267.9	267.7	267.5	267.3	267.2	266.7	266.1	265.1	262.9	260.7	259.3	251.0	249.9	247.0	244.2	242.3	246.5	247.1	247.4	247.6	247.8	247.7	247.7
266.3	265.9	265.5	264.7	264.0	263.8	264.2	264.7	269.0	270.3	270.9	271.4	271.8	271.6	271.3	271.1	271.1	271.0	270.6	270.2	269.9	269.8	269.7	269.3	269.0	268.5	267.9	267.3	267.3	267.4	267.2	266.7	266.3	265.5	264.7	263.6	262.2	260.8	259.0	257.1	255.4	253.7	252.1	251.5	250.9	250.2	249.5	248.7	248.3	248.0
263.9	263.6	263.3	263.2	263.0	262.9	262.8	261.7	266.0	264.4	267.5	267.5	269.4	269.7	270.0	270.1	270.2	270.4	270.0	269.6	269.4	269.1	268.9	268.5	268.1	267.8	267.7	267.6	267.2	266.8	266.2	265.3	264.2	264.0	263.8	263.2	262.1	261.0	258.9	256.7	255.4	254.6	253.9	253.5	253.1	252.8	252.0	249.6	248.7	247.4
264.3	264.2	264.2	264.2	264.1	263.9	263.7	263.5	263.4	263.2	263.1	263.4	263.8	264.1	264.1	264.0	264.1	268.6	268.9	268.8	268.6	268.2	267.8	267.3	266.6	266.1	266.1	266.0	265.2	264.5	264.1	263.6	260.6	260.8	261.6	261.3	260.7	259.5	257.6	255.5	254.6	253.8	253.1	252.5	251.9	247.3	249.4	247.7	245.6	241.2
266.3	265.9	265.5	265.2	264.8	264.5	264.2	263.9	263.5	263.0	262.7	262.3	262.0	261.5	261.0	260.3	259.9	261.7	263.6	265.3	265.7	266.1	266.5	266.0	264.5	263.2	257.4	256.4	257.4	263.2	263.3	263.3	262.3	260.3	258.4	252.1	252.1	251.5	250.9	250.2	251.9	245.8	244.5	243.9	243.6	243.3	243.0	242.1	240.5	239.8
268.1	267.6	267.0	266.4	265.8	265.3	265.0	264.6	264.1	263.6	262.9	262.3	261.5	260.8	260.2	259.9	259.5	259.0	258.4	257.3	256.2	256.5	264.1	264.1	262.8	261.5	251.3	249.6	258.4	260.3	259.7	247.5	245.1	244.2	244.2	245.1	245.8	245.7	245.6	244.9	244.1	243.9	243.9	244.0	244.2	244.2	243.8	243.4	242.9	242.4
269.8	269.4	268.8	268.1	267.4	266.6	266.0	265.4	265.0	264.8	264.6	264.5	264.6	263.5	262.4	261.6	261.0	261.0	261.0	260.0	258.4	258.2	261.7	261.5	260.3	258.7	256.4	248.8	249.6	250.8	246.1	242.7	240.9	239.5	239.9	242.5	244.3	244.3	244.3	243.7	242.9	242.6	242.9	243.5	244.2	244.8	245.1	245.0	244.8	244.8
271.8	271.7	271.0	270.3	269.4	268.5	267.7	267.0	266.7	266.7	266.8	267.0	267.1	267.1	266.9	266.3	265.3	265.0	264.1	262.8	262.3	261.0	256.9	254.7	253.6	252.7	251.6	250.8	250.4	249.8	247.9	246.0	244.6	243.2	243.6	244.2	244.3	244.1	244.3	244.5	244.2	243.7	243.6	244.0	244.4	244.9	245.7	245.9	246.3	246.8
273.9	273.2	272.7	272.2	271.5	270.8	270.1	269.3	268.8	268.4	268.1	267.9	267.8	267.7	267.7	267.7	267.0	265.8	264.3	263.4	262.6	258.8	257.4	256.0	255.6	255.1	254.5	253.8	252.6	251.4	249.9	248.4	246.9	245.4	244.6	243.8	243.5	243.2	243.7	244.2	244.3	244.5	244.9	245.4	245.4	245.3	245.7	246.1	247.1	248.1
273.6	273.4	273.3	273.7	272.7	272.6	272.1	271.7	271.2	270.8	270.3	269.9	269.8	269.6	269.3	269.2	268.8	266.4	266.2	266.0	263.8	262.2	261.2	260.2	259.5	258.8	257.8	256.8	255.4	254.0	252.4	250.9	249.3	247.8	246.6	245.4	244.6	243.9	243.9	244.0	244.3	244.6	245.3	246.1	246.8	247.4	247.7	248.0	249.4	250.8
274.0	273.8	273.9	274.3	274.0	273.8	273.6	273.3	273.0	272.8	272.6	272.4	272.0	272.6	271.8	272.2	272.0	271.7	270.4	269.4	268.4	267.4	266.4	265.3	264.2	263.0	261.5	260.1	258.6	257.1	255.7	254.3	252.9	251.5	250.2	249.0	247.9	247.0	246.2	245.7	245.4	245.4	245.7	246.6	247.7	248.9	249.9	251.4	252.6	252.8
274.6	274.6	274.6	274.6	274.7	274.7	274.7	274.5	274.4	274.3	274.2	274.0	274.2	274.5	274.0	273.7	273.4	273.1	273.0	272.8	272.1	271.6	271.1	270.6	269.6	268.5	267.1	265.5	263.8	262.1	260.5	258.9	257.3	255.8	254.3	252.9	251.5	250.2	249.0	248.2	247.6	247.6	247.8	248.7	249.7	251.2	252.6	254.1	254.8	254.2
275.0	275.1	275.2	275.2	275.1	275.2	275.3	275.4	275.4	275.5	275.5	275.3	275.3	275.0	274.7	274.6	274.5	274.2	274.1	274.0	273.8	273.6	273.4	273.2	272.8	272.4	271.6	270.7	269.5	268.3	266.8	265.2	263.3	261.5	259.7	258.0	256.3	254.8	253.4	252.4	251.6	251.5	251.5	252.4	253.4	254.8	256.1	257.1	257.4	256.7
275.1	275.3	275.5	275.6	275.7	276.0	276.0	275.8	275.0	275.1	275.3	275.2	275.1	275.0	274.9	274.4	274.2	274.1	274.1	274.1	274.0	273.9	273.7	273.6	273.5	273.2	273.0	272.8	272.5	272.1	271.5	270.7	269.5	268.2	266.6	265.0	263.2	261.6	260.1	259.0	257.9	257.5	257.4	257.9	258.5	259.3	260.1	260.9	260.9	260.6
274.7	274.8	275.0	275.1	275.2	275.2	275.2	275.0	274.3	274.1	273.9	273.9	273.8	273.7	273.7	273.7	273.7	273.8	273.8	273.8	273.7	273.6	273.5	273.4	273.3	273.1	272.9	272.8	272.8	272.9	272.8	272.7	272.3	272.0	271.5	270.9	270.0	268.9	267.9	266.8	265.7	265.0	264.4	264.2	264.1	264.2	264.7	265.4	265.4	265.3
274.5	274.3	274.2	274.1	274.0	273.7	273.5	273.2	273.3	273.3	273.2	272.9	272.6	272.3	272.2	272.4	272.6	272.7	272.8	272.9	273.0	273.1	273.1	273.1	273.0	272.9	272.7	272.5	272.4	272.4	272.5	272.5	272.6	272.6	272.6	272.6	272.5	272.3	272.1	271.7	271.3	270.8	270.2	269.5	268.8	268.3	268.5	269.2	269.5	269.6
273.6	273.0	272.5	272.3	272.0	271.8	271.7	271.6	271.7	271.7	271.6	271.4	271.1	271.1	271.2	271.6	271.8	272.0	272.1	272.1	272.2	272.4	272.6	272.7	272.7	272.5	272.4	272.2	272.2	272.2	272.2	272.3	272.4	272.4	272.4	272.4	272.4	272.3	272.4	272.5	272.7	272.6	272.5	271.7	271.0	270.4	270.6	271.3	271.8	272.1
273.1	272.5	272.0	271.8	271.3	271.0	271.0	271.0	271.1	271.1	270.9	270.6	270.2	270.5	270.8	271.2	271.3	271.3	271.2	271.2	271.6	271.9	272.1	272.1	272.1	272.1	272.0	271.8	271.8	271.9	272.0	272.2	272.4	272.4	272.4	272.3	272.2	272.0	272.0	272.1	272.5	272.7	272.8	272.3	271.8	271.2	271.4	271.8	272.4	272.8
272.9	272.5	272.0	271.7	271.5	271.3	271.2	271.2	271.2	271.2	271.1	270.9	270.8	270.8	271.0	271.2	271.2	271.1	270.8	270.7	270.8	271.1	271.2	271.1	271.2	271.3	271.3	271.3	271.4	271.5	271.7	272.0	272.1	272.2	272.2	272.2	272.2	272.1	272.1	272.1	272.3	272.4	272.4	272.1	271.8	271.4	271.4	271.7	272.2	272.7
272.7	272.3	271.9	271.8	271.8	271.6	271.4	271.4	271.5	271.5	271.3	271.1	271.0	271.0	271.1	271.3	271.2	271.1	270.9	270.8	270.8	270.9	270.7	270.2	270.5	270.6	270.7	270.8	271.0	271.2	271.4	271.7	271.8	272.0	272.2	272.3	272.3	272.2	272.1	272.1	272.0	271.9	271.8	271.6	271.4	271.1	271.2	271.4	272.0	272.4
272.9	272.7	272.5	272.3	272.1	271.9	271.6	271.6	271.6	271.5	271.2	271.2	271.3	271.4	271.3	271.1	271.1	270.9	270.7	270.4	270.2	270.2	270.3	270.3	270.3	270.4	270.6	270.8	271.0	271.3	271.6	271.7	271.8	271.7	271.8	271.8	271.9	271.7	271.7	271.7	271.6	271.5	271.1	270.9	270.7	270.6	270.8	271.2	271.8	272.2
273.1	272.9	272.5	272.1	272.0	271.9	271.8	271.6	271.5	271.3	271.1	271.1	271.2	271.2	271.1	270.8	270.7	270.8	270.9	270.5	270.3	270.3	270.4	270.5	270.5	270.6	270.6	270.6	270.8	271.1	271.5	271.6	271.7	271.6	271.5	271.4	271.3	271.1	271.1	271.2	271.0	270.8	270.6	270.3	270.0	269.8	270.3	270.9	271.5	271.6
273.3	272.8	272.3	271.8	271.7	271.6	271.5	271.3	271.1	270.9	270.8	270.7	270.7	270.8	270.9	270.9	270.7	270.8	271.0	270.6	270.3	270.4	270.5	270.7	271.1	270.9	270.8	270.7	270.9	271.2	271.5	271.6	271.6	271.4	271.1	270.8	270.6	270.3	270.3	270.5	270.3	270.2	270.2	269.1	268.4	268.1	269.1	270.0	270.9	270.9
273.5	273.0	272.4	271.9	271.6	271.4	271.2	271.0	270.9	270.7	270.6	270.6	270.4	270.2	270.4	270.9	271.4	271.6	271.7	271.4	271.0	271.0	271.2	271.4	271.6	271.4	271.2	271.2	271.3	271.3	271.4	271.4	271.3	270.8	270.4	270.0	269.8	269.6	269.5	269.7	269.8	269.6	269.0	267.6	266.2	265.7	266.6	268.2	269.2	269.6
273.8	273.3	272.8	272.3	271.8	271.5	271.2	270.9	271.0	270.9	270.6	270.4	270.4	270.2	270.3	270.7	271.4	271.8	272.1	272.2	271.9	271.9	272.0	272.0	271.8	271.7	271.6	271.5	271.4	271.3	271.3	271.3	270.7	269.8	269.2	268.6	268.7	268.9	269.2	269.8	269.9	269.6	268.7	266.9	265.9	264.9	264.7	265.6	267.4	268.3
274.2	273.7	273.2	272.5	272.1	271.7	271.5	271.2	271.2	271.1	270.8	270.5	270.5	270.2	269.9	270.0	270.4	271.0	271.6	271.6	271.8	272.0	272.1	271.8	271.7	271.7	271.6	271.5	271.4	271.3	271.1	270.6	269.8	269.1	268.4	267.8	267.9	268.4	269.3	270.3	270.8	270.7	269.7	267.4	266.8	266.2	265.3	263.7	266.1	267.1
274.3	273.8	273.3	272.7	272.2	271.8	271.5	271.4	271.3	271.2	271.0	270.8	270.7	270.2	269.7	269.4	269.9	270.4	270.6	270.6	271.4	271.9	271.9	271.3	271.3	271.4	271.5	271.5	271.2	270.7	270.1	269.4	268.8	268.3	268.0	267.7	269.2	269.6	269.9	271.0	271.4	271.2	270.3	268.7	267.6	266.9	265.5	262.5	263.8	264.9
274.1	273.7	273.1	272.6	272.1	271.9	271.7	271.7	271.6	271.5	271.3	271.2	271.0	270.8	270.5	270.3	270.2	270.3	270.5	270.9	270.7	271.3	271.8	271.7	270.7	271.0	271.5	271.0	270.1	269.3	268.4	267.7	267.3	267.2	267.5	268.3	269.6	270.6	271.2	271.5	271.3	270.8	269.9	268.7	267.6	266.2	265.0	264.4	263.4	263.4
273.8	273.4	272.8	272.3	272.0	271.9	271.9	271.9	271.9	271.9	271.9	271.7	271.5	271.3	271.1	270.9	270.8	270.9	271.1	271.4	271.4	271.2	270.8	270.4	271.2	271.3	270.9	270.2	269.0	267.5	266.1	265.4	265.4	267.2	269.0	269.3	270.8	271.2	270.8	270.0	269.9	269.5	268.7	267.6	266.5	265.5	264.4	263.1	262.3	261.9
273.4	273.3	272.7	272.1	272.0	271.9	272.0	272.1	272.3	272.4	272.5	272.3	272.2	272.1	271.8	271.6	271.5	271.5	271.5	271.4	271.2	271.1	270.9	270.4	271.3	271.6	271.2	270.1	268.5	266.4	265.6	267.7	266.6	267.3	268.9	270.3	271.3	271.1	270.2	269.1	268.5	267.7	266.8	265.8	264.8	263.9	262.9	261.9	261.3	261.1
273.6	273.9	273.5	272.7	272.5	272.5	272.6	272.7	272.8	272.9	272.9	273.0	272.9	272.8	272.6	272.5	272.3	272.0	271.6	271.1	271.0	270.9	270.8	270.7	271.1	271.2	271.0	270.7	269.4	269.3	269.5	269.2	269.6	270.2	270.8	271.3	271.4	270.4	268.9	267.2	266.3	265.4	264.7	263.9	263.1	262.3	261.5	261.0	260.7	261.4
272.5	273.1	273.4	273.4	273.1	273.1	273.2	273.4	273.5	273.5	273.5	273.6	273.7	273.7	273.6	273.3	272.9	272.4	271.9	271.6	271.4	271.1	271.0	270.8	270.7	270.8	271.2	271.7	271.6	270.8	269.8	269.7	270.3	271.1	271.6	271.8	271.2	269.4	267.4	265.5	264.1	263.7	263.2	262.7	262.2	261.8	261.5	262.4	263.8	264.8
271.9	272.0	272.3	272.9	273.3	273.5	273.8	274.0	274.2	274.1	274.4	274.7	274.9	274.8	274.6	274.2	273.6	273.1	272.5	272.3	272.3	272.2	271.9	271.4	271.0	270.8	270.9	271.1	271.6	271.8	271.7	271.9	272.4	272.3	272.0	271.5	270.4	268.2	266.0	264.3	263.1	263.9	263.8	263.1	262.3	262.6	263.6	264.8	264.9	262.8
271.7	271.4	271.4	272.1	273.2	273.9	274.7	275.3	275.5	276.0	275.6	275.6	275.6	275.5	275.6	276.4	276.1	275.4	274.0	273.7	273.4	273.1	272.7	272.2	271.8	271.5	271.3	271.6	272.0	272.3	272.5	272.6	273.1	272.8	271.4	270.5	269.1	267.7	265.4	264.7	263.7	265.7	265.9	264.6	263.1	264.9	265.1	264.1	263.6	262.0
271.2	271.0	271.2	272.1	273.3	274.7	276.0	278.7	278.9	278.9	278.4	277.7	276.8	276.5	277.0	277.5	277.2	276.0	274.9	274.7	274.5	274.0	273.2	272.7	272.3	272.1	272.0	272.6	272.9	273.0	272.9	272.8	273.5	272.9	271.8	270.7	269.1	267.5	266.3	265.7	265.7	266.0	264.8	264.2	264.9	264.7	263.0	262.3	261.9	262.3
271.7	271.7	272.3	273.1	274.2	275.5	277.1	280.1	280.6	280.6	280.3	279.8	278.2	277.4	280.0	279.8	279.2	276.3	275.4	274.9	274.4	273.7	272.2	271.6	271.6	272.1	272.8	273.4	273.8	273.6	273.8	273.6	274.0	273.5	272.3	270.8	269.7	268.6	268.2	267.9	267.6	267.2	266.4	265.2	265.2	264.8	264.4	263.6	263.3	263.3
274.0	273.9	274.1	274.0	275.0	276.1	279.8	281.1	281.1	281.2	281.2	281.2	281.4	280.9	281.2	281.3	281.0	280.2	279.7	275.1	274.1	271.6	269.2	268.8	269.6	271.0	272.5	273.5	273.9	273.9	274.5	275.1	275.6	275.2	274.6	271.7	270.5	269.9	269.8	269.6	269.2	268.5	267.1	265.7	266.1	266.5	265.9	265.4	264.9	265.3
275.2	275.1	274.9	274.7	275.8	279.6	280.6	281.3	281.3	281.3	281.5	281.7	281.9	282.0	282.1	282.0	281.8	281.7	281.4	281.0	280.0	271.9	269.6	267.2	266.6	268.1	270.4	271.6	271.3	271.9	273.4	275.8	277.0	277.0	276.1	275.3	272.1	271.7	271.5	271.3	270.5	269.4	267.8	266.9	267.3	267.1	266.4	264.8	264.9	265.9
274.5	274.8	275.1	275.8	276.8	280.4	281.3	281.6	281.6	281.6	281.6	281.4	281.4	281.7	282.0	282.3	282.3	282.2	282.4	282.5	282.3	281.4	280.0	269.3	266.0	264.8	266.4	266.3	266.1	267.2	268.8	275.2	277.0	278.0	277.5	277.0	276.5	275.7	273.1	272.5	271.3	269.9	268.5	268.0	268.6	268.5	268.0	265.5	265.3	266.3
273.4	274.4	275.8	277.0	278.6	281.0	281.7	281.9	281.7	281.7	281.2	275.9	273.4	273.1	279.9	281.1	282.0	282.4	282.7	283.0	283.2	283.4	280.5	269.6	265.7	263.8	265.7	264.7	266.7	266.6	267.1	269.3	276.2	278.0	278.2	278.3	278.1	275.4	274.2	273.1	271.7	270.3	269.0	268.8	269.8	269.5	269.3	268.8	268.8	268.3
275.1	276.2	277.4	278.4	279.6	280.9	281.5	280.1	279.8	276.5	275.6	272.8	272.0	271.6	273.1	273.0	272.9	279.7	279.9	280.4	279.6	279.5	271.4	266.4	262.4	263.4	266.7	268.0	269.6	269.5	268.7	269.2	271.5	277.4	278.5	279.1	279.2	278.8	275.5	274.4	272.3	270.6	269.2	268.8	269.8	269.8	269.8	270.3	270.6	270.4
281.7	278.9	280.9	279.5	279.5	279.1	276.7	275.9	273.7	272.3	272.2	272.5	272.9	272.4	271.9	271.0	268.9	268.9	268.3	268.1	267.3	266.7	266.2	265.3	264.8	265.9	266.7	266.4	266.9	268.9	270.9	271.4	271.2	273.7	278.5	279.8	280.3	279.9	275.8	273.9	272.5	271.2	270.2	269.8	270.1	270.5	270.6	270.1	270.7	271.0
284.1	283.9	281.5	280.6	279.2	277.7	275.5	273.9	272.6	272.4	272.6	273.1	273.4	272.9	271.4	269.5	268.1	268.7	268.7	268.5	268.2	265.9	264.3	264.0	264.5	266.3	267.2	266.7	265.9	268.7	271.0	272.5	273.5	278.3	280.1	280.8	281.1	280.9	279.0	274.4	272.8	271.7	271.2	271.0	270.8	271.2	273.3	272.8	270.8	271.1
285.3	285.8	285.6	282.4	280.9	278.9	277.9	276.1	273.5	273.0	273.0	272.8	272.8	272.5	271.6	270.7	270.0	270.3	269.5	270.0	269.4	267.3	265.0	263.6	263.1	265.0	266.3	267.7	267.7	269.0	269.5	270.7	272.8	280.1	281.7	281.9	282.2	282.0	280.3	275.7	274.9	273.6	272.2	271.8	272.0	271.8	271.6	273.7	271.6	271.6
285.8	286.8	287.1	285.3	282.4	281.7	280.9	278.9	275.9	273.4	273.0	272.9	272.4	272.5	273.2	273.3	273.1	272.3	272.1	273.4	271.7	270.1	269.1	267.6	265.7	264.8	265.3	267.1	268.1	267.9	268.9	270.6	272.6	280.5	283.0	283.1	283.1	282.7	281.5	276.9	276.8	275.1	272.2	270.6	271.3	272.4	272.9	272.2	272.8	271.9
287.2	287.7	288.0	287.4	282.4	282.0	279.5	277.7	278.4	277.2	275.7	273.9	272.7	273.2	276.0	279.5	279.3	278.7	276.5	275.2	271.9	271.7	271.9	271.0	269.9	268.7	267.1	267.3	268.0	267.6	268.7	270.1	272.6	275.1	281.3	282.4	283.3	283.3	282.4	279.5	277.5	275.2	273.0	271.7	271.0	270.5	272.2	273.4	271.8	271.9
288.6	288.9	289.3	289.0	287.9	284.4	280.6	279.5	284.8	282.5	279.7	277.3	276.7	282.1	281.5	285.1	282.9	281.8	282.3	280.1	277.9	277.3	277.0	276.6	276.1	274.1	271.3	268.3	268.4	267.2	268.0	269.4	271.0	272.4	273.0	275.0	279.0	280.7	276.4	275.3	273.7	272.2	271.5	271.6	271.8	271.1	270.6	272.7	273.2	271.9
289.0	289.0	289.2	289.4	289.2	288.5	287.4	287.0	288.3	288.6	287.1	285.9	286.3	287.9	288.6	286.0	284.3	283.1	283.4	283.2	282.7	282.0	281.6	281.4	280.3	278.2	275.9	273.5	270.6	267.9	268.6	269.5	269.7	270.1	270.7	270.6	270.8	272.0	272.1	271.5	271.8	272.6	273.2	273.4	273.1	272.0	270.6	271.2	271.6	271.5
288.8	288.6	289.1	289.4	289.4	289.3	289.3	289.3	289.5	289.7	289.4	288.5	289.1	289.6	288.9	285.2	283.6	282.8	282.7	283.0	283.2	282.8	282.3	281.9	281.8	281.2	279.6	277.5	275.0	270.9	269.3	269.5	269.2	268.9	270.7	272.3	272.1	272.1	272.8	274.0	275.0	275.6	275.7	275.0	274.4	273.7	271.8	270.3	271.3	270.5
289.6	289.0	289.5	289.6	289.5	289.4	289.4	289.2	289.2	289.3	289.2	289.0	289.2	289.6	288.2	281.8	280.7	281.1	281.5	282.2	282.5	282.0	281.5	281.4	282.0	282.8	282.1	281.0	277.7	273.4	270.6	270.2	269.8	269.6	270.4	272.2	273.3	273.9	274.8	275.7	276.2	276.5	276.6	276.5	276.3	275.7	273.5	272.2	272.5	269.7
290.2	289.7	289.9	290.0	289.9	289.8	289.7	289.6	289.4	289.4	289.4	289.5	289.7	289.8	287.6	281.3	279.5	280.3	280.5	280.9	280.8	279.9	279.7	280.5	281.6	283.2	283.2	282.5	280.1	275.9	273.1	271.7	270.7	270.0	269.7	270.1	271.2	272.3	273.4	274.2	274.8	275.8	276.7	277.0	276.9	275.2	272.9	272.7	273.9	274.1
290.3	290.2	290.3	290.4	290.2	290.2	290.1	290.0	289.8	289.7	289.6	289.7	289.8	289.7	286.0	282.1	280.4	280.4	279.8	279.4	278.6	278.2	278.8	280.2	282.1	283.9	284.6	283.5	282.1	279.4	277.3	276.1	274.6	271.9	270.2	270.5	271.5	272.2	272.9	273.6	274.3	275.4	276.7	277.6	277.7	276.2	272.9	272.7	274.6	275.7
289.8	290.7	291.1	290.8	290.7	290.4	290.3	290.3	290.0	289.9	289.8	289.7	289.9	289.2	284.3	281.5	281.1	281.1	280.1	278.9	278.1	278.4	279.4	280.6	282.2	284.0	285.6	283.9	283.0	282.4	281.7	281.1	280.2	276.3	271.9	271.1	273.0	274.2	273.9	273.8	274.3	275.6	276.3	277.9	279.2	278.1	274.3	273.5	275.3	275.8
287.8	288.1	287.4	290.1	290.7	290.6	290.3	290.3	289.6	287.0	289.6	289.6	289.2	284.3	282.9	280.7	281.6	282.1	281.1	280.0	279.6	280.0	281.2	281.7	282.5	283.3	284.9	285.1	283.7	283.7	283.8	283.6	283.0	279.8	274.5	271.2	271.9	273.8	274.0	272.6	274.0	275.9	275.7	277.9	279.7	279.7	276.3	274.4	275.6	275.6
288.4	288.0	287.4	287.5	290.2	288.3	286.7	287.5	286.4	285.9	285.9	284.9	283.6	282.5	281.5	280.0	281.1	282.1	281.9	281.5	281.2	281.5	282.4	282.9	282.8	282.8	283.5	284.7	284.5	284.9	285.3	285.1	283.6	282.1	278.9	274.6	271.4	271.8	272.8	272.0	273.5	275.4	274.6	275.3	279.1	281.1	278.0	274.6	275.8	275.2
288.9	288.6	288.4	288.7	289.0	288.1	287.7	287.7	287.0	285.7	285.0	284.1	282.6	281.8	281.0	280.2	281.1	281.3	281.7	281.7	281.5	281.7	282.3	282.9	282.7	282.6	282.7	283.6	284.4	284.9	285.5	285.9	287.7	288.2	283.2	280.6	275.1	272.6	272.6	272.7	273.9	274.6	272.7	271.3	276.2	280.5	279.4	275.0	276.0	277.3
288.9	288.7	288.8	289.2	289.2	288.9	288.9	289.0	286.5	285.7	285.1	285.0	282.0	282.2	282.1	281.4	281.9	280.8	281.0	281.2	280.8	280.9	281.4	282.0	282.0	282.2	282.5	283.0	283.7	284.0	284.1	285.8	289.2	289.9	289.2	284.1	279.6	275.5	275.3	275.5	274.9	274.9	273.3	271.7	274.5	279.7	280.1	277.2	273.8	277.0
288.6	288.5	288.6	288.6	288.9	289.1	289.1	289.1	286.6	286.6	285.4	286.1	284.2	286.4	284.9	282.2	281.8	280.7	280.7	280.7	280.4	280.4	280.9	281.5	281.6	281.6	281.8	282.6	283.5	283.6	282.9	285.1	289.7	290.8	290.2	289.6	283.6	280.4	279.3	280.0	280.1	280.5	279.8	276.6	278.5	279.2	280.5	278.3	275.9	275.1
287.3	287.1	287.4	287.7	287.9	288.2	288.5	288.2	286.2	286.9	285.7	287.4	291.2	293.6	293.0	288.1	280.8	280.3	280.8	281.1	280.7	280.4	280.6	281.5	281.8	281.8	281.8	282.5	283.3	283.3	282.6	284.6	287.3	290.8	291.5	291.4	290.2	285.5	283.5	283.1	284.7	286.2	286.7	285.8	282.5	282.4	282.7	283.8	281.0	277.2
286.4	286.2	286.2	286.2	286.5	286.8	286.9	287.4	286.3	285.9	286.6	287.7	289.8	294.3	294.7	289.9	287.1	281.3	281.4	281.5	280.7	280.7	280.9	281.7	282.4	282.9	283.3	283.1	283.2	282.9	283.3	285.0	286.9	289.4	292.7	293.7	293.2	292.1	290.7	289.0	289.4	291.4	292.6	288.3	283.2	282.0	284.2	285.5	283.4	281.4
286.7	286.3	285.7	285.8	286.2	286.6	286.6	286.9	287.3	286.3	285.8	287.0	289.0	293.2	295.0	294.6	290.7	284.5	283.4	282.6	281.0	281.7	282.8	283.6	284.1	284.1	283.9	283.6	283.2	283.0	283.6	285.3	286.9	288.9	292.2	293.4	294.1	294.4	294.2	293.8	294.0	294.4	294.0	292.6	288.0	286.5	285.6	286.3	285.8	286.1
287.5	286.8	285.8	285.8	286.4	286.7	286.8	287.1	287.8	287.6	286.6	287.8	289.2	290.8	294.3	295.6	294.8	287.8	286.0	285.4	282.9	282.6	284.0	285.3	285.4	284.8	284.6	284.4	283.8	283.6	284.0	284.9	286.7	288.0	289.0	290.6	293.3	294.5	294.6	294.9	295.0	292.3	289.0	293.1	292.7	292.1	291.8	289.9	289.8	289.9
288.2	286.8	285.7	285.6	286.4	287.0	287.4	288.1	288.4	288.2	288.1	288.9	289.9	290.7	294.1	295.4	295.4	290.2	288.8	287.9	285.7	284.3	284.5	285.7	285.8	285.1	285.0	285.1	284.9	284.8	285.1	285.6	286.8	287.7	289.0	290.9	293.6	294.3	294.5	294.7	292.0	290.0	288.4	292.9	294.0	293.5	293.6	293.4	293.6	293.7
288.4	286.6	285.3	285.6	286.5	287.4	288.0	288.7	289.0	288.9	289.1	290.0	290.9	291.2	291.9	295.2	296.0	296.3	294.3	290.6	287.6	285.4	285.3	286.5	286.5	286.1	286.2	286.4	286.3	285.9	286.3	286.7	287.5	288.4	289.9	291.1	291.9	291.8	291.2	290.3	290.5	289.2	287.8	288.5	292.8	292.9	293.4	293.7	293.8	293.9
288.4	286.6	285.6	286.1	287.0	287.9	288.5	289.1	289.5	289.6	290.3	291.2	291.7	291.7	291.8	294.8	295.8	296.5	296.9	291.9	288.8	286.3	286.3	288.0	287.6	287.3	287.7	288.0	287.9	287.2	287.5	288.1	288.8	289.8	290.8	291.3	291.3	290.7	289.8	288.6	290.0	290.9	289.6	287.7	287.0	286.9	291.9	293.6	293.9	294.1
288.0	286.8	286.3	286.6	287.3	288.1	288.7	289.2	289.7	289.9	290.6	291.6	292.3	291.9	290.8	291.1	295.1	296.1	297.0	296.1	288.7	285.9	287.2	289.3	288.9	288.6	288.8	289.5	289.2	288.6	288.9	289.6	290.4	291.2	291.7	291.7	291.3	290.7	289.6	288.6	288.7	291.4	291.0	289.4	288.4	287.7	287.8	293.5	294.4	294.5
287.8	287.0	286.7	286.9	287.4	288.1	288.8	289.4	289.9	290.2	290.6	291.8	292.9	292.4	290.8	290.8	292.4	296.0	297.2	294.0	290.1	287.0	288.0	289.8	290.3	290.3	290.0	290.4	290.2	289.9	290.4	291.0	291.7	292.3	292.4	292.2	291.7	291.0	290.0	289.1	288.8	289.7	290.2	290.8	290.7	289.9	289.9	294.1	294.8	294.8
287.8	287.4	287.1	287.1	287.5	288.3	289.2	290.0	290.6	290.8	291.3	292.5	293.6	293.5	292.6	292.1	292.3	296.2	297.7	297.3	292.4	289.0	287.8	289.3	290.9	291.3	291.5	291.7	291.5	291.3	291.6	292.2	292.9	293.2	293.1	292.6	292.1	291.3	290.4	289.8	289.8	290.0	290.8	291.4	291.6	291.8	294.3	295.0	295.2	295.3
288.0	287.9	287.6	287.4	287.8	288.8	290.0	290.9	291.6	291.8	292.4	293.5	294.7	295.1	294.3	292.9	292.0	296.4	298.1	298.2	298.2	292.0	290.2	288.9	290.2	291.4	292.1	292.3	292.3	292.3	292.5	293.2	293.9	294.0	293.8	293.1	292.4	291.5	290.8	290.5	290.6	290.7	291.0	291.3	292.1	294.9	295.3	295.6	295.7	295.7
288.4	288.5	288.2	287.9	288.3	289.4	290.6	291.2	292.1	292.7	293.4	294.3	295.8	296.3	295.6	293.4	291.6	296.0	298.2	298.8	299.4	298.6	294.0	289.8	288.7	290.1	291.3	292.0	292.3	292.6	293.1	293.9	294.6	294.6	294.2	293.4	292.6	291.7	291.0	290.8	291.2	291.4	291.5	292.0	293.1	295.6	295.9	295.9	296.0	296.1
288.5	289.2	289.0	288.5	288.8	289.8	290.9	291.8	292.1	292.4	293.4	294.4	295.8	296.9	296.8	294.2	291.5	295.0	297.5	299.2	299.5	299.0	295.2	291.5	287.5	287.9	290.5	291.9	292.6	293.0	293.3	294.2	294.8	294.8	294.4	293.6	292.6	291.6	290.9	290.8	291.4	291.9	293.8	295.5	296.3	296.5	296.4	296.2	296.2	296.3
287.8	288.8	288.9	288.8	289.2	290.0	291.0	292.0	292.1	292.6	293.4	294.5	296.1	297.5	297.7	296.1	293.6	293.1	293.8	298.0	299.1	299.1	298.6	294.0	289.1	286.8	290.8	292.7	293.1	293.4	293.1	293.8	294.6	294.7	293.9	292.7	291.5	290.6	290.1	290.2	290.8	292.7	295.5	296.9	297.1	297.0	296.8	296.6	296.5	296.4
287.7	288.3	288.4	288.6	289.2	290.0	290.7	291.3	291.7	292.8	293.9	295.1	296.8	298.3	298.9	298.5	296.8	294.8	293.2	297.1	298.4	298.8	299.0	298.6	292.6	287.7	288.7	291.2	293.4	292.9	292.6	292.9	293.4	293.3	292.3	290.9	289.9	289.5	289.8	290.7	291.6	295.3	297.1	297.2	297.4	297.4	297.3	296.9	296.6	296.6
288.2	288.1	288.1	288.4	289.1	290.1	290.9	291.3	291.8	293.0	294.4	295.5	297.0	298.3	299.4	300.0	299.6	297.2	293.3	292.8	297.9	298.7	298.8	299.2	296.3	290.1	288.0	293.6	293.2	292.5	292.3	292.1	292.5	291.9	291.0	290.5	290.9	293.9	295.2	296.0	296.1	296.7	297.2	297.3	297.6	297.7	297.6	297.3	296.9	296.8
289.0	288.3	287.9	288.2	289.4	290.6	291.4	292.0	292.6	293.9	295.1	295.8	296.5	295.7	297.2	299.0	300.0	297.5	292.5	292.2	296.3	298.8	298.9	299.2	297.5	291.3	287.2	292.0	294.1	293.9	292.7	291.6	291.2	291.1	291.2	291.5	292.8	296.4	297.2	297.3	297.0	297.0	297.3	297.6	297.8	298.0	298.0	297.7	297.3	297.2
289.9	288.9	288.6	289.0	290.3	291.3	292.1	292.9	293.8	294.8	295.5	295.0	295.1	295.8	297.0	298.1	297.8	295.8	292.2	289.9	293.8	297.8	298.9	299.3	298.7	291.9	287.4	291.4	291.8	291.7	290.6	289.7	289.9	291.5	294.8	295.6	296.3	297.0	297.2	297.0	297.0	297.1	297.5	297.7	298.0	298.2	298.2	298.1	297.9	297.7
290.2	289.9	290.6	291.1	291.4	291.7	292.0	292.7	293.4	293.9	294.6	295.1	296.0	296.8	297.7	298.2	297.1	295.0	291.9	289.0	292.6	298.4	299.5	299.2	298.8	293.9	289.2	288.3	289.2	290.0	290.8	291.3	292.4	296.2	297.4	297.6	297.5	297.2	297.1	297.0	297.0	297.2	297.5	297.7	298.0	298.2	298.5	298.5	298.4	298.4
288.6	290.1	291.8	292.4	292.2	292.1	292.2	292.5	292.8	293.5	294.6	295.7	296.9	298.0	298.7	298.4	295.1	292.3	291.3	288.8	291.8	298.3	299.7	298.9	298.8	295.9	292.5	291.0	290.9	293.0	296.6	297.0	297.7	298.3	298.4	298.1	297.7	297.4	297.1	297.0	297.0	297.3	297.5	297.7	297.9	298.3	298.6	298.7	298.8	298.8
290.0	291.8	292.7	293.2	293.4	293.3	293.0	293.0	293.1	294.0	295.6	296.6	297.5	298.7	299.1	297.2	293.1	290.9	290.6	288.8	291.3	297.6	299.6	298.0	296.4	296.7	295.2	297.2	297.3	298.0	298.1	298.4	298.6	298.5	298.3	298.1	298.0	297.7	297.3	297.1	297.2	297.4	297.5	297.7	298.0	298.4	298.7	298.9	299.1	299.1
292.7	293.1	293.4	294.1	294.3	294.5	294.2	293.7	293.4	294.7	296.7	297.3	297.5	298.2	297.2	294.5	292.5	290.8	290.0	288.6	289.9	296.1	298.4	296.8	295.0	297.0	298.0	298.3	298.4	298.3	298.0	297.9	298.1	297.8	297.2	297.6	298.1	298.1	297.6	297.3	297.5	297.6	297.6	297.8	298.1	298.5	298.8	299.0	299.2	299.3
293.6	293.6	293.9	294.8	295.0	295.5	295.3	294.4	294.5	296.1	298.0	298.2	297.0	296.3	295.1	293.5	291.7	290.8	290.2	287.7	288.9	295.5	298.1	296.2	294.0	296.6	297.9	298.0	297.8	297.3	296.7	296.1	293.5	293.8	294.1	295.1	298.2	298.5	298.2	297.8	297.8	297.7	297.9	298.0	298.4	298.7	299.0	299.2	299.3	299.4
294.4	294.5	294.7	295.3	295.9	296.5	296.7	296.0	296.1	297.3	298.3	298.7	296.9	294.9	295.5	294.5	292.5	291.9	291.7	288.6	289.5	295.4	297.8	295.4	292.4	292.6	293.7	293.6	293.5	293.4	292.8	292.0	292.6	293.3	294.1	297.5	298.5	298.8	298.6	298.3	298.1	297.9	298.2	298.4	298.7	298.9	299.2	299.3	299.5	299.4
295.1	295.0	295.4	296.1	296.7	297.2	297.4	297.2	297.0	297.4	297.9	298.7	297.1	294.6	294.4	294.3	293.2	292.5	290.9	288.6	291.1	295.6	296.0	294.2	291.5	290.4	292.0	292.4	292.9	293.9	294.2	293.9	293.4	293.8	295.0	298.0	298.7	299.0	298.9	298.7	298.5	298.4	298.6	298.8	299.0	299.2	299.4	299.6	299.7	299.5
295.9	296.2	296.6	296.7	297.3	297.5	297.4	297.3	297.5	297.6	297.9	299.0	297.1	295.9	292.5	292.1	291.8	290.5	288.7	289.0	292.0	293.6	293.6	295.1	294.8	293.2	293.2	293.8	294.5	295.3	296.3	296.1	294.9	294.6	295.5	298.3	298.9	299.0	299.0	299.0	298.9	298.9	299.0	299.1	299.3	299.4	299.6	299.8	299.8	299.5
296.5	297.0	297.7	298.2	298.9	298.4	297.9	298.0	299.4	298.1	297.6	298.0	299.9	296.4	290.4	288.0	289.4	288.9	288.0	288.8	290.0	293.0	295.8	298.4	298.4	297.3	296.4	296.4	296.4	296.3	296.8	296.3	295.5	295.7	297.9	298.6	298.8	298.9	299.0	299.1	299.2	299.2	299.2	299.3	299.5	299.6	299.9	300.1	299.8	299.3
297.3	297.7	298.4	298.9	299.6	299.8	299.0	298.5	300.0	298.2	296.9	299.7	300.3	296.6	290.1	286.8	288.4	289.5	289.4	288.1	287.6	292.2	297.1	299.3	298.9	298.5	298.1	297.9	297.9	298.0	297.8	296.9	296.3	296.7	298.3	298.6	298.7	298.8	299.1	299.2	299.3	299.4	299.4	299.5	299.7	299.9	300.1	300.0	299.5	299.0
298.0	298.4	298.6	299.0	299.5	300.1	300.4	300.4	300.4	299.8	297.3	297.1	298.4	296.1	291.8	289.5	288.9	290.0	289.7	288.6	289.7	294.1	297.4	298.8	299.9	300.0	299.5	299.1	299.2	299.3	298.7	297.6	297.2	298.4	298.7	298.7	298.7	298.9	299.1	299.3	299.4	299.5	299.5	299.7	299.8	300.0	300.0	299.7	299.2	298.9
298.0	298.4	298.4	298.7	299.2	299.8	300.3	300.4	300.6	299.2	298.7	298.9	297.7	293.9	293.1	293.3	291.9	291.6	290.9	290.8	294.3	297.8	298.5	298.0	300.1	301.6	301.3	300.2	300.0	299.8	298.8	297.8	297.7	298.8	299.0	299.0	299.0	299.1	299.2	299.3	299.4	299.5	299.5	299.7	299.9	300.1	299.9	299.3	298.9	298.9
299.1	297.7	297.7	298.3	299.0	299.7	300.0	300.1	300.4	300.9	300.0	300.0	298.9	295.9	295.2	296.4	294.9	294.5	294.1	295.8	297.5	298.9	299.7	299.4	300.2	300.7	301.0	300.8	300.2	299.6	298.6	297.9	298.6	299.1	299.2	299.2	299.2	299.3	299.3	299.4	299.4	299.5	299.6	299.7	299.9	300.0	299.7	299.0	298.8	298.9
300.2	300.0	298.6	298.3	298.8	299.3	299.6	299.6	299.6	299.8	298.6	295.5	296.8	296.8	299.6	302.1	301.3	299.6	297.3	297.7	298.5	299.2	300.5	301.3	301.3	299.8	299.2	300.3	300.1	299.2	298.2	298.4	298.8	299.1	299.2	299.2	299.3	299.3	299.3	299.2	299.4	299.5	299.6	299.8	299.9	299.9	299.5	299.0	298.9	299.1
296.3	298.3	300.9	300.3	299.1	299.2	299.7	299.7	299.2	298.6	296.2	293.1	293.5	295.9	300.6	303.9	304.3	302.5	300.4	299.9	300.5	301.2	301.9	302.5	302.3	300.5	299.7	300.9	300.1	298.7	298.2	298.5	298.8	299.0	299.1	299.1	299.1	299.2	299.2	299.3	299.4	299.4	299.5	299.7	299.8	299.7	299.3	298.9	299.0	299.3
296.4	296.2	296.2	296.3	297.4	297.8	298.4	298.7	298.2	298.0	296.0	293.2	293.6	295.5	300.1	303.9	304.2	303.3	302.2	302.3	303.0	303.3	303.3	303.5	303.0	301.8	301.4	301.3	299.8	298.7	298.6	298.7	298.7	298.7	298.8	298.9	299.0	299.1	299.2	299.3	299.4	299.5	299.6	299.7	299.8	299.5	299.2	299.1	299.2	299.3
296.3	296.2	296.0	295.9	295.6	295.5	296.2	295.7	296.1	296.5	294.7	294.8	294.8	295.7	298.3	302.2	302.0	301.1	301.0	302.0	303.5	304.5	304.5	304.4	303.6	302.4	301.5	300.8	299.5	299.0	298.9	298.8	298.7	298.6	298.6	298.7	298.9	299.0	299.2	299.3	299.4	299.6	299.7	299.8	299.7	299.5	299.3	299.3	299.3	299.3
296.1	295.9	295.6	295.4	295.0	294.7	294.5	294.1	295.2	294.1	293.2	294.2	294.4	293.6	296.2	298.5	298.2	298.0	299.2	300.8	302.7	304.6	305.1	304.7	303.1	301.2	300.2	300.0	299.5	299.3	299.1	299.0	298.9	298.8	298.7	298.8	299.0	299.1	299.3	299.4	299.6	299.7	299.7	299.9	299.6	299.4	299.3	299.2	299.3	299.3
295.6	295.3	295.0	294.5	294.0	293.5	292.8	293.2	293.4	291.8	292.6	292.7	292.3	292.1	293.1	295.4	294.4	295.0	297.4	299.4	302.3	304.5	304.6	303.2	301.3	300.2	299.7	299.6	299.5	299.4	299.3	299.2	299.1	299.0	298.9	299.0	299.3	299.5	299.6	299.7	299.7	299.7	299.7	299.9	299.7	299.5	299.3	299.3	299.4	299.4
295.0	294.7	294.4	293.7	293.3	292.3	291.5	292.2	291.8	291.1	293.3	293.9	293.5	291.5	291.5	292.6	291.4	292.8	296.0	298.6	301.7	303.6	302.7	300.9	300.0	299.6	299.6	299.7	299.7	299.6	299.5	299.4	299.3	299.2	299.2	299.3	299.6	299.8	299.9	300.0	299.8	299.7	299.7	299.8	299.7	299.6	299.4	299.5	299.6	299.5
294.6	294.4	293.9	293.6	293.3	291.5	289.9	290.8	290.9	291.4	293.7	294.4	293.8	290.4	291.0	292.4	291.5	292.6	295.8	298.2	300.5	301.4	300.4	299.8	299.5	299.5	299.6	299.9	300.0	299.9	299.8	299.7	299.6	299.5	299.5	299.6	299.8	300.0	300.1	299.9	299.8	299.5	299.6	299.7	299.5	299.5	299.6	299.5	299.4	299.5
294.5	294.3	293.9	293.4	292.9	290.8	288.8	289.1	289.8	291.2	293.6	294.2	291.4	290.5	290.7	293.6	293.9	293.8	295.7	297.6	299.2	299.8	299.5	299.6	299.5	299.5	299.8	300.1	300.3	300.3	300.1	300.1	299.9	299.8	299.8	299.9	300.0	299.8	299.7	299.6	299.5	299.3	299.4	299.6	299.4	299.5	299.7	299.4	299.3	299.5
294.4	294.4	293.8	293.2	292.5	290.3	288.5	288.9	289.5	291.0	292.6	293.7	292.1	291.2	292.4	295.6	295.2	294.1	295.7	297.4	298.6	299.5	299.6	299.6	299.6	299.7	300.0	300.4	300.6	300.6	300.5	300.3	300.2	300.0	300.0	300.1	299.9	299.3	299.1	299.1	299.2	299.3	299.4	299.3	299.1	299.1	299.3	299.4	299.4	299.3
294.2	294.2	293.8	293.3	292.6	290.5	289.4	289.8	289.8	290.5	291.6	292.7	292.6	291.7	293.7	296.6	294.4	293.7	295.6	297.1	298.3	299.6	299.8	299.7	299.7	299.8	300.2	300.7	300.9	300.9	300.8	300.6	300.4	300.3	300.2	300.2	299.9	299.2	299.0	299.0	298.9	299.3	299.2	299.0	298.5	298.2	298.4	298.7	298.9	298.9
294.3	294.2	294.1	293.6	293.1	291.6	290.9	290.9	290.2	290.8	292.1	292.4	292.8	292.2	293.1	295.1	296.0	295.2	295.9	297.5	298.7	300.0	300.0	299.9	299.8	300.0	300.5	301.0	301.1	301.1	300.9	300.7	300.6	300.6	300.5	300.3	300.1	299.5	299.3	299.4	299.2	299.4	298.9	298.8	298.4	298.2	298.2	298.3	298.6	298.8
294.3	294.2	294.1	294.2	293.9	293.0	293.3	291.9	290.9	291.4	292.6	292.8	292.4	291.6	292.1	294.3	296.1	296.3	297.0	297.8	299.9	300.4	300.1	300.0	300.0	300.3	300.7	301.0	301.2	301.1	301.0	300.8	300.7	300.7	300.8	300.8	300.5	299.7	299.5	299.7	299.3	299.1	299.0	299.3	299.2	299.1	299.1	299.0	299.1	299.2
293.8	294.4	294.7	294.6	294.1	293.3	294.5	292.1	291.2	291.8	292.8	293.0	291.7	291.4	292.5	294.1	293.9	295.4	297.7	300.0	300.6	300.5	300.3	300.2	300.2	300.5	300.9	301.1	301.1	301.1	301.0	300.9	300.8	300.9	301.0	300.9	300.4	299.6	299.4	299.5	299.2	299.0	299.3	299.9	300.1	300.1	299.9	299.6	299.2	299.2
293.6	294.3	294.9	295.1	294.5	293.6	294.0	291.6	291.0	291.8	292.5	292.2	290.7	291.6	293.3	293.7	293.1	294.5	297.4	300.7	301.0	300.8	300.5	300.4	300.6	300.8	301.1	301.2	301.2	301.2	301.2	301.2	301.2	301.0	300.8	300.7	300.2	299.5	299.2	299.4	299.5	299.3	299.3	300.1	300.3	300.3	299.9	299.6	299.2	299.3
293.4	294.0	294.7	295.1	294.6	293.1	291.9	293.4	292.2	291.8	291.9	291.3	290.9	291.9	293.3	293.4	293.9	296.3	298.2	299.5	300.9	301.0	300.9	300.9	301.0	301.1	301.4	301.4	301.5	301.5	301.5	301.3	301.0	300.6	300.3	300.3	299.8	299.4	299.4	299.7	300.0	299.6	299.1	299.9	300.3	300.1	299.6	299.4	299.6	300.0
293.1	293.8	294.4	294.4	293.7	292.5	291.3	291.7	292.4	291.7	292.2	291.8	291.8	292.6	292.8	292.4	294.2	297.4	298.5	298.9	300.8	301.2	301.2	301.1	301.2	301.4	301.6	301.6	301.6	301.5	301.3	301.0	300.7	300.5	300.2	299.9	299.7	299.7	300.0	300.1	300.3	300.1	299.4	299.9	300.5	300.3	299.6	299.4	299.9	300.4
292.9	293.8	293.9	293.1	292.1	291.8	291.5	292.0	292.8	291.3	292.8	292.7	292.1	291.8	291.2	292.9	296.5	299.5	299.8	300.3	301.2	301.4	301.3	301.2	301.3	301.7	301.7	301.5	301.4	301.2	300.8	300.6	300.4	300.2	299.7	299.4	299.6	300.0	300.4	300.5	300.5	300.5	300.2	300.6	300.6	300.0	299.2	299.2	299.8	300.1
293.1	293.8	293.5	292.3	291.6	292.8	292.0	292.4	292.0	291.1	291.8	291.9	291.8	292.0	292.5	295.2	297.7	299.3	299.9	300.4	301.3	301.5	301.4	301.4	301.5	301.8	301.9	301.3	300.9	300.5	300.1	300.0	300.0	300.0	299.8	299.4	299.6	300.0	300.5	300.7	300.6	300.7	300.7	300.9	300.4	299.3	298.8	299.1	299.6	299.9
293.2	293.1	292.6	292.4	292.3	291.9	291.3	291.2	291.5	291.7	292.0	292.2	293.1	293.3	294.2	295.9	297.0	298.0	299.4	300.4	300.7	301.5	301.5	301.5	301.7	301.9	301.7	300.9	300.4	299.9	299.7	299.7	299.7	300.0	300.2	299.9	299.6	299.7	300.2	300.6	300.8	300.8	300.8	300.7	299.8	299.0	299.2	299.9	300.1	300.0
292.6	292.1	292.3	293.1	292.7	292.0	291.3	291.1	291.8	292.4	293.1	293.3	293.8	295.8	295.3	295.5	296.4	297.9	299.6	300.2	300.4	301.5	301.6	301.7	301.8	301.7	301.4	300.6	300.1	299.9	299.9	299.9	299.8	300.0	300.3	300.1	299.7	299.6	300.0	300.5	300.8	300.7	300.9	300.5	299.3	299.1	299.7	300.4	300.5	300.2
292.0	291.7	292.0	292.9	292.7	292.1	291.8	292.0	292.1	292.9	294.2	294.2	294.2	296.9	295.8	295.6	296.1	297.8	299.5	299.3	299.2	301.5	301.9	301.9	301.7	301.3	300.9	300.5	300.3	300.2	300.2	300.3	300.1	300.0	300.0	299.8	299.7	299.9	300.5	300.8	301.1	301.0	301.0	300.2	299.0	299.2	300.2	300.7	300.7	300.6
292.1	292.0	292.1	292.8	292.9	292.4	292.3	292.3	291.9	293.3	295.0	294.4	294.4	297.3	296.1	295.3	295.7	297.1	298.4	298.3	298.2	301.5	302.2	302.1	301.6	301.2	300.8	300.7	300.5	300.4	300.4	300.7	300.4	300.1	300.0	299.7	299.9	300.3	300.9	301.4	301.5	301.4	301.0	300.1	298.8	299.3	300.7	301.0	300.9	300.8
293.0	292.9	292.8	293.3	293.4	293.1	292.6	292.3	292.5	294.1	295.4	294.2	294.2	297.2	295.7	294.8	295.3	296.7	297.9	298.2	298.3	301.0	301.9	302.1	301.7	301.3	301.0	300.9	300.7	300.5	300.3	300.2	299.2	298.1	299.7	299.9	300.0	300.5	301.1	301.6	301.6	301.4	300.9	300.2	299.0	299.9	301.1	301.1	300.8	300.8
293.3	293.7	293.6	293.6	293.8	293.9	293.3	293.5	294.4	295.2	294.9	293.6	293.8	296.7	296.4	295.3	295.1	296.3	297.5	298.0	298.0	300.3	301.3	301.7	301.6	301.4	301.3	301.1	301.1	300.7	300.1	299.1	295.3	295.1	299.0	299.7	299.8	300.1	300.8	301.3	301.5	301.2	300.8	300.1	299.1	300.4	301.1	300.9	300.7	300.6
292.9	293.5	294.4	294.5	294.6	294.6	294.5	295.4	295.8	295.1	294.5	293.8	293.5	295.8	296.7	296.0	295.7	296.4	297.0	297.2	297.3	299.0	301.3	301.5	301.4	301.3	301.2	300.8	300.9	301.1	300.4	296.7	293.5	293.7	298.8	299.9	300.2	300.2	300.6	300.9	301.2	300.7	300.4	299.9	299.4	300.7	301.1	300.8	300.7	300.6
292.9	293.4	294.5	295.3	295.0	295.0	295.5	296.2	296.0	295.1	295.2	295.7	294.9	295.1	295.6	295.7	295.4	295.3	295.4	296.2	297.1	298.5	301.1	301.3	301.3	301.2	301.3	301.2	301.4	301.2	299.0	297.0	294.5	294.8	296.6	300.1	300.4	300.4	300.5	300.7	300.6	300.1	300.0	299.7	299.7	300.8	300.7	300.5	300.7	300.8
293.5	293.8	294.7	295.4	295.2	295.4	295.7	296.2	296.7	296.5	296.8	297.7	297.5	296.1	295.6	295.3	295.4	295.1	295.6	296.9	298.8	301.0	301.2	301.2	301.1	301.3	301.5	301.4	300.8	299.6	299.1	297.6	296.2	295.4	298.8	300.2	299.7	299.4	300.0	300.5	300.3	300.0	300.1	299.4	299.4	300.4	300.4	300.5	300.8	301.1
294.1	294.3	294.4	294.8	295.6	295.9	294.9	294.4	295.0	295.7	296.7	297.8	298.1	297.7	296.9	296.3	296.3	296.5	297.2	298.8	301.1	301.5	301.3	301.2	301.2	301.7	301.4	298.3	298.8	298.5	299.1	297.2	294.5	294.5	299.5	299.8	299.3	299.2	299.5	299.9	300.2	300.4	300.1	299.0	299.1	300.0	300.5	300.9	301.0	301.0
294.7	294.7	294.3	294.5	295.3	295.4	294.4	293.3	293.0	293.9	295.4	296.4	297.3	297.8	297.8	297.5	297.4	298.0	300.0	300.8	301.7	301.8	301.5	301.3	301.5	301.5	299.0	298.0	297.3	297.8	297.8	295.2	293.3	298.2	299.4	299.1	299.0	299.1	299.4	299.8	300.0	300.2	300.0	298.8	298.9	299.9	300.6	300.9	300.9	300.8
294.8	294.9	294.6	294.6	294.6	294.5	294.6	293.9	292.8	292.6	293.2	294.4	296.3	297.6	297.9	298.1	298.8	300.8	301.4	301.7	301.9	301.9	301.7	301.6	301.6	301.3	298.9	298.0	296.7	295.9	294.8	293.1	293.2	298.6	299.6	299.4	299.0	298.8	299.3	299.8	299.7	299.6	299.6	299.0	299.3	300.1	300.6	300.8	300.7	300.6
294.2	294.3	294.4	294.7	294.8	294.5	294.5	293.5	292.2	291.8	292.2	294.0	296.2	297.5	297.7	298.3	300.3	301.2	301.8	302.0	301.9	301.9	301.8	301.8	301.8	301.4	300.5	297.9	296.8	295.7	293.5	292.1	293.9	299.1	299.8	299.6	299.7	299.6	299.8	299.8	299.5	299.3	299.6	299.7	300.0	300.4	300.7	300.7	300.5	300.3
294.2	294.5	295.1	295.4	295.2	294.3	293.2	292.2	291.5	291.8	292.5	294.1	296.2	297.7	298.1	298.9	299.6	300.5	301.4	301.7	301.6	301.7	301.8	302.0	302.1	301.8	300.8	298.1	296.8	294.9	292.5	292.5	294.7	299.7	299.9	299.7	300.0	300.0	300.0	299.7	299.6	299.6	300.1	300.3	300.3	300.5	300.7	300.5	300.1	299.9
294.4	294.9	295.1	294.7	293.7	292.6	291.8	291.7	291.7	292.3	293.1	294.3	295.9	297.4	298.6	298.4	298.3	299.6	300.8	301.2	301.3	301.5	301.7	302.0	302.0	301.9	301.2	298.5	296.6	293.9	292.0	293.5	299.4	300.2	300.1	300.2	300.4	300.4	300.1	300.0	300.1	300.0	300.5	300.5	300.2	300.3	300.4	300.1	299.7	299.6
294.7	295.4	294.8	293.8	293.1	292.6	292.4	292.6	292.8	293.4	294.3	295.3	295.9	296.4	297.7	298.1	298.6	299.6	300.5	300.9	301.0	301.3	301.6	301.7	301.6	301.7	300.1	298.8	297.2	294.4	292.7	295.1	300.4	300.7	300.5	300.6	300.6	300.5	300.3	300.2	300.1	299.6	300.1	300.2	300.0	299.9	299.8	299.6	299.6	299.7
295.3	295.5	294.7	293.9	293.9	294.1	294.2	294.1	293.9	294.8	295.7	296.3	296.3	296.0	296.2	298.7	299.5	299.8	300.2	300.4	300.5	300.7	301.0	301.0	300.9	301.1	300.2	298.5	297.5	295.0	294.4	296.7	300.9	301.1	300.7	300.4	300.3	300.3	300.2	299.9	299.6	299.2	299.6	299.7	299.5	299.5	299.4	299.4	299.6	299.6
296.4	295.6	294.6	294.1	294.4	294.7	294.7	294.5	294.7	296.3	297.0	297.3	297.1	296.4	296.1	299.2	299.7	299.7	299.8	299.9	300.0	300.0	300.2	300.3	300.2	300.8	299.7	297.2	295.9	294.8	296.0	300.1	301.1	301.1	300.6	300.2	300.1	300.1	299.9	299.6	299.7	299.4	299.3	298.9	298.4	298.6	299.0	299.3	299.4	299.4
297.9	296.6	295.7	295.3	294.8	294.2	294.0	294.3	295.5	297.0	297.7	298.1	297.9	297.5	297.3	299.5	299.6	299.4	299.5	299.6	299.6	299.6	299.6	299.7	299.8	300.2	300.9	297.7	295.2	294.8	296.7	300.3	300.9	300.6	300.2	300.1	299.9	299.9	299.7	299.5	299.5	299.2	298.7	297.9	297.2	297.7	298.8	299.1	299.0	298.9
298.8	298.0	297.8	297.4	295.5	294.1	294.4	294.8	295.8	297.3	298.1	298.4	298.3	298.3	298.7	299.6	299.5	299.4	299.4	299.5	299.4	299.3	299.1	299.2	299.3	299.7	301.5	298.9	296.5	295.5	296.7	299.9	300.4	300.1	299.7	299.7	299.6	299.5	299.5	299.4	299.1	298.5	297.8	297.1	297.1	297.9	298.7	298.7	298.5	298.5
299.1	298.4	298.1	297.8	296.3	296.0	296.5	294.8	294.8	296.7	297.7	298.1	298.3	298.4	299.2	299.5	299.6	299.5	299.4	299.4	299.4	299.2	298.8	298.7	298.7	298.7	300.2	300.0	298.6	298.0	298.8	299.7	299.8	299.6	299.3	299.3	299.3	299.3	299.1	298.9	298.6	297.7	297.1	297.1	297.6	298.3	298.3	298.2	298.2	298.1
300.7	299.3	297.2	295.5	296.5	296.3	294.4	293.3	293.0	294.8	297.6	299.0	299.0	299.0	299.4	299.4	299.5	299.3	299.1	299.1	299.2	298.9	298.6	298.3	298.2	298.2	298.5	299.1	299.3	299.4	299.3	299.5	299.3	299.1	298.8	298.8	299.0	299.1	298.7	298.4	298.0	297.4	297.3	297.5	297.8	298.0	297.9	297.7	297.8	297.7
301.6	299.6	297.8	296.2	295.0	293.6	292.6	290.8	292.5	294.0	297.0	299.3	299.2	299.2	299.5	299.2	299.1	298.9	298.7	298.6	298.7	298.5	298.3	298.2	298.0	298.0	298.2	298.8	299.5	299.6	299.2	299.0	298.9	298.8	298.4	298.3	298.4	298.2	297.7	297.5	297.5	297.4	297.5	297.6	297.6	297.4	297.2	297.2	297.3	297.1
301.0	300.9	299.1	297.6	295.5	293.8	292.0	290.7	292.7	293.9	296.6	298.8	298.9	298.9	299.1	298.8	298.6	298.2	298.1	298.0	298.1	298.2	298.1	298.0	297.9	297.9	298.1	298.8	299.1	298.9	298.5	298.4	298.4	298.5	298.1	297.7	297.3	296.9	296.7	296.9	297.1	297.2	297.4	297.3	297.0	296.7	296.6	296.5	296.7	296.5
301.4	301.7	301.0	298.3	294.2	292.4	292.0	292.2	292.5	295.0	296.3	298.3	298.8	298.5	298.5	298.4	298.3	298.0	297.9	297.9	298.1	298.2	298.1	298.1	298.1	297.9	297.9	298.3	298.4	298.2	298.0	297.8	297.8	297.7	297.2	296.7	296.4	296.4	296.3	296.3	296.5	296.8	296.9	296.7	296.4	296.1	295.9	295.9	296.2	296.2
303.3	302.0	300.6	297.5	292.2	289.1	290.7	294.1	294.3	294.0	296.4	298.1	298.4	298.1	298.2	298.1	298.1	297.9	297.9	297.9	297.8	297.9	298.1	298.1	298.0	297.7	297.5	297.8	298.0	297.7	297.6	297.5	297.3	297.0	296.5	295.9	295.9	296.0	296.0	296.0	296.3	296.5	296.2	295.8	295.5	295.3	295.3	295.5	295.7	295.8
304.2	303.3	300.3	296.5	291.2	287.5	290.2	293.7	294.7	296.0	297.3	297.9	298.0	297.9	297.7	297.6	297.6	297.4	297.3	297.2	297.2	297.3	297.6	297.6	297.4	297.0	296.7	296.9	297.0	297.2	297.2	296.9	296.5	296.4	296.0	295.7	295.7	295.5	295.6	295.8	296.0	295.9	295.5	295.2	294.9	294.9	294.9	295.1	295.1	295.2
305.1	303.8	301.0	296.4	291.5	289.1	290.4	292.2	294.8	296.7	297.6	297.8	297.7	297.6	297.4	297.3	297.3	297.1	297.0	296.9	297.1	297.2	297.1	297.0	296.7	296.3	296.0	295.8	295.8	296.2	296.5	296.5	296.0	296.0	296.0	295.7	295.5	295.2	295.3	295.6	295.7	295.5	295.1	294.9	294.7	294.5	294.5	294.6	294.6	294.5
303.7	302.7	300.7	297.0	294.5	293.4	294.4	294.2	296.4	297.3	297.5	297.6	297.4	297.2	297.0	296.9	297.0	296.8	296.7	296.6	296.7	296.8	296.7	296.6	296.3	295.8	295.5	295.3	295.2	295.4	295.5	295.7	295.5	295.5	295.7	295.4	294.9	294.8	295.1	295.2	295.1	295.0	294.9	294.6	294.4	294.2	294.1	294.2	294.1	294.0
299.8	299.9	299.5	298.6	297.6	295.8	296.6	297.0	297.3	297.5	297.5	297.4	297.1	297.0	296.8	296.6	296.6	296.4	296.3	296.1	295.9	296.0	296.1	296.1	295.9	295.3	295.0	295.0	294.9	294.9	295.0	295.1	295.1	295.1	294.9	294.5	294.2	294.3	294.5	294.5	294.4	294.3	294.3	294.1	294.0	293.9	293.8	293.8	293.7	293.7
297.4	298.2	298.7	298.9	297.3	297.4	297.7	297.5	297.3	297.3	297.2	297.1	296.9	296.8	296.7	296.5	296.2	296.0	295.8	295.5	295.3	295.3	295.4	295.4	295.1	294.7	294.5	294.6	294.6	294.7	294.7	294.7	294.6	294.4	294.0	293.7	293.6	293.7	293.9	293.9	293.8	293.7	293.7	293.7	293.6	293.5	293.4	293.5	293.5	293.4
297.9	298.4	299.5	299.9	299.0	297.8	297.4	297.2	297.0	296.9	296.7	296.5	296.3	296.3	296.2	296.0	295.8	295.7	295.4	295.1	294.8	294.8	294.8	294.7	294.6	294.4	294.2	294.2	294.3	294.4	294.5	294.4	294.3	294.1	293.8	293.6	293.4	293.4	293.5	293.5	293.4	293.3	293.3	293.3	293.3	293.1	293.0	293.1	293.2	293.1
297.2	297.6	299.0	298.0	297.9	297.2	296.7	296.7	296.7	296.6	296.3	295.9	295.7	295.6	295.6	295.5	295.5	295.4	295.1	294.8	294.5	294.4	294.4	294.3	294.1	294.0	293.8	293.8	293.9	294.0	294.1	294.0	294.0	294.0	293.8	293.7	293.4	293.3	293.3	293.3	293.2	293.1	293.0	293.0	293.0	292.8	292.6	292.7	292.8	292.7
295.9	295.6	296.0	296.8	296.6	296.2	296.2	296.2	296.3	296.2	296.0	295.6	295.5	295.4	295.4	295.4	295.2	295.1	294.8	294.5	294.3	294.2	294.1	294.0	293.9	293.7	293.6	293.5	293.5	293.6	293.6	293.6	293.6	293.6	293.5	293.4	293.2	293.1	293.1	293.1	293.0	293.0	292.9	292.8	292.7	292.5	292.3	292.2	292.3	292.1
296.0	296.0	296.0	296.0	295.8	295.7	295.8	295.9	295.9	295.9	295.7	295.4	295.3	295.2	295.1	295.0	294.8	294.6	294.4	294.3	294.2	294.1	294.0	293.8	293.5	293.4	293.4	293.4	293.4	293.3	293.2	293.1	293.1	293.0	292.9	292.9	292.8	292.7	292.7	292.7	292.8	292.8	292.7	292.5	292.4	292.2	291.9	291.8	291.8	291.6
295.7	295.6	295.6	295.6	295.5	295.4	295.4	295.3	295.2	295.2	295.1	295.1	295.1	294.8	294.5	294.4	294.3	294.2	294.2	294.1	294.0	293.9	293.8	293.6	293.3	293.1	293.1	293.1	293.1	293.0	292.8	292.7	292.6	292.5	292.5	292.4	292.4	292.3	292.2	292.3	292.5	292.6	292.4	292.1	292.0	291.9	291.7	291.4	291.3	291.0
294.6	294.8	295.0	295.2	295.4	295.4	295.3	295.0	294.6	294.5	294.6	294.8	294.8	294.5	294.2	294.0	294.0	294.0	294.0	293.8	293.7	293.7	293.5	293.2	293.0	292.8	292.8	292.7	292.7	292.6	292.5	292.3	292.1	292.0	292.0	292.1	292.1	292.0	291.9	292.0	292.2	292.4	292.2	291.8	291.7	291.7	291.4	291.1	290.9	290.7
293.5	293.4	293.6	294.2	294.9	295.3	295.4	295.0	294.4	294.2	294.3	294.6	294.6	294.4	294.2	294.0	293.9	293.9	293.8	293.5	293.4	293.4	293.2	293.0	292.8	292.5	292.4	292.3	292.3	292.1	292.1	292.0	291.9	291.7	291.6	291.7	291.8	291.7	291.6	291.6	291.7	291.9	291.9	291.6	291.4	291.4	291.2	290.9	290.7	290.5
293.2	292.7	292.8	293.4	294.3	294.9	295.0	294.5	294.2	294.2	294.2	294.3	294.3	294.3	294.2	294.0	293.8	293.7	293.4	293.0	293.1	293.2	293.0	292.8	292.6	292.4	292.2	292.1	292.0	291.6	291.6	291.7	291.6	291.4	291.4	291.5	291.5	291.4	291.4	291.4	291.3	291.2	291.3	291.2	291.1	290.9	290.7	290.6	290.5	290.3
293.9	293.1	292.5	292.6	293.2	293.9	294.1	293.8	294.0	294.2	294.1	294.0	294.0	293.7	293.4	293.2	293.3	293.4	292.7	292.2	292.6	292.8	292.8	292.6	292.5	292.3	292.2	292.1	291.8	291.4	291.3	291.6	291.6	291.4	291.2	291.2	291.1	291.0	291.2	291.2	291.1	291.0	290.9	290.8	290.6	290.5	290.4	290.3	290.2	289.9
293.6	293.1	292.7	292.2	291.9	292.2	292.6	292.8	293.3	293.4	293.3	293.1	292.8	292.6	292.6	292.8	293.0	292.7	291.7	291.4	291.8	292.2	292.3	292.1	291.9	291.6	291.6	291.9	291.7	291.1	290.9	290.9	291.1	291.2	291.1	291.0	290.9	290.9	290.8	290.8	290.7	290.7	290.6	290.5	290.4	290.1	290.0	289.9	289.8	289.5
292.6	292.6	292.4	291.9	291.2	291.0	291.2	291.8	292.1	292.1	292.0	291.9	291.9	291.9	292.0	292.2	292.0	291.1	290.7	290.6	290.8	291.0	291.0	290.8	290.5	290.3	290.5	291.1	291.2	290.7	290.2	290.0	290.1	290.0	289.9	290.1	290.3	290.1	289.8	289.7	289.7	290.0	290.3	290.4	290.3	290.0	289.8	289.6	289.5	289.2
291.6	291.8	291.6	291.3	290.8	290.4	290.3	290.6	290.9	290.8	290.7	290.8	290.9	291.2	291.2	290.9	290.3	289.7	289.5	289.5	289.5	289.4	289.3	289.1	289.0	289.2	289.2	289.2	289.4	289.5	289.0	288.5	288.3	287.4	287.2	287.9	288.6	288.3	288.1	288.2	288.2	288.7	289.5	290.0	290.0	289.9	289.4	289.2	289.2	289.2
290.1	290.2	290.3	290.4	290.4	290.1	289.7	289.6	289.9	290.1	289.8	289.6	289.6	289.8	289.8	289.4	288.8	288.2	288.0	288.1	288.0	287.8	287.4	287.3	287.5	287.8	287.4	286.1	286.0	286.3	286.0	285.8	286.0	285.3	285.3	286.2	286.5	286.4	286.6	287.3	287.3	287.4	288.1	288.9	289.4	289.2	288.5	288.2	288.4	288.7
288.4	288.7	289.0	289.2	289.5	289.5	289.0	288.6	288.8	289.3	289.1	288.6	288.3	288.0	287.9	287.7	287.3	286.8	286.5	286.4	286.3	285.9	285.6	285.5	285.5	285.3	284.8	283.7	283.4	283.4	283.4	283.4	283.4	283.3	283.7	284.1	284.3	284.5	285.0	285.9	286.3	286.1	286.5	287.4	288.2	288.2	287.6	287.0	287.2	287.8
286.5	287.3	287.9	288.0	288.1	288.0	287.7	287.5	288.0	288.5	288.3	287.6	287.0	286.7	286.5	286.4	286.0	285.5	285.3	285.2	285.0	284.4	283.9	283.8	283.5	283.2	282.7	282.1	281.8	281.7	281.7	281.7	281.8	281.8	282.2	282.4	282.5	282.8	283.2	283.6	284.0	284.3	285.2	286.3	287.2	287.5	286.9	286.3	286.4	287.1
284.2	285.1	285.9	286.2	286.4	286.4	286.5	286.8	287.3	287.4	287.2	286.7	286.1	285.8	285.5	285.2	284.8	284.4	284.1	284.0	283.7	283.2	282.6	282.2	281.9	281.6	281.2	280.8	280.6	280.4	280.4	280.5	280.7	280.9	281.1	281.1	281.2	281.4	281.5	281.6	281.8	282.4	283.6	285.1	286.1	286.4	286.0	285.2	285.8	286.5
282.1	282.5	283.2	284.1	284.7	285.2	285.7	286.2	286.3	286.1	285.9	285.7	285.5	285.2	284.9	284.5	284.1	283.6	283.3	283.1	282.7	282.2	281.5	281.1	280.7	280.4	280.2	279.9	279.7	279.5	279.4	279.4	279.6	279.9	280.0	280.1	280.2	280.3	280.4	280.5	280.8	281.2	281.9	283.0	284.0	284.4	284.2	283.4	284.2	285.0
280.7	280.7	281.2	282.0	282.9	283.7	284.5	285.2	285.5	285.3	285.1	284.9	284.9	284.8	284.5	284.1	283.8	283.3	282.9	282.5	282.0	281.4	280.8	280.3	280.0	279.7	279.5	279.3	279.2	279.0	278.8	278.7	278.8	279.0	279.2	279.3	279.3	279.4	279.4	279.5	279.7	280.0	280.4	281.1	281.7	282.1	282.0	281.8	282.1	282.6
279.7	279.8	280.1	280.6	281.3	282.0	282.9	283.8	284.5	284.6	284.5	284.4	284.4	284.4	284.2	283.8	283.5	283.1	282.7	282.2	281.6	281.0	280.2	279.8	279.5	279.3	279.2	279.0	278.8	278.6	278.4	278.3	278.3	278.3	278.4	278.4	278.4	278.3	278.3	278.3	278.5	278.8	279.2	279.8	280.3	280.5	280.4	280.5	280.7	281.1
278.9	279.0	279.3	279.6	280.0	280.6	281.5	282.4	283.2	283.6	283.7	283.7	283.8	283.7	283.4	283.0	282.8	282.6	282.3	281.8	281.3	280.8	280.1	279.5	279.2	279.0	278.9	278.7	278.5	278.3	278.1	277.9	277.8	277.8	277.8	277.7	277.6	277.5	277.4	277.4	277.6	277.9	278.4	279.0	279.4	279.5	279.4	279.6	279.8	280.0
278.0	278.1	278.3	278.6	279.1	279.7	280.5	281.4	282.2	282.8	283.0	283.0	282.8	282.7	282.5	282.3	282.1	282.0	281.7	281.4	281.0	280.5	279.9	279.4	279.0	278.8	278.7	278.6	278.4	278.2	278.0	277.7	277.6	277.4	277.3	277.2	277.1	277.0	276.9	276.9	277.0	277.3	277.8	278.2	278.6	278.7	278.7	278.8	278.8	278.8
277.4	277.5	277.6	277.7	278.1	278.6	279.2	279.9	280.9	281.7	282.3	282.1	281.8	281.8	281.9	281.9	281.8	281.5	281.3	281.1	280.8	280.4	279.9	279.4	279.1	278.8	278.6	278.6	278.5	278.2	277.9	277.7	277.5	277.4	277.2	277.1	277.0	276.8	276.7	276.7	276.9	277.2	277.5	277.8	277.9	277.9	277.8	277.8	277.7	277.6
276.8	277.1	277.2	277.2	277.5	277.7	277.9	278.1	279.1	280.1	280.9	281.2	281.2	281.3	281.4	281.5	281.4	281.2	281.0	280.8	280.6	280.3	279.9	279.5	279.3	279.1	278.9	278.7	278.5	278.2	278.0	277.8	277.6	277.4	277.2	277.0	277.0	276.9	276.8	276.8	277.0	277.2	277.5	277.5	277.4	277.3	277.1	276.9	276.9	276.8
275.7	276.2	276.5	276.8	277.0	277.0	277.1	277.2	278.0	278.7	279.4	279.8	280.2	280.5	280.7	280.8	280.8	280.7	280.6	280.5	280.3	280.0	279.7	279.4	279.3	279.2	279.0	278.8	278.5	278.3	278.1	278.0	277.8	277.7	277.5	277.3	277.1	277.0	276.9	276.9	277.0	277.2	277.3	277.3	277.3	277.1	277.0	276.8	276.7	276.6
274.5	274.9	275.4	275.9	276.3	276.5	276.7	276.9	277.5	277.9	278.2	278.5	279.2	279.7	280.1	280.3	280.3	280.2	280.1	279.9	279.7	279.5	279.3	279.2	279.1	278.9	278.8	278.7	278.5	278.4	278.3	278.2	278.2	278.0	277.9	277.7	277.5	277.3	277.2	277.2	277.2	277.3	277.3	277.2	277.1	277.0	276.9	276.9	276.8	276.7
273.7	273.9	274.3	274.9	275.5	276.0	276.4	276.7	277.0	277.2	277.3	277.5	278.0	278.6	279.1	279.6	279.7	279.7	279.5	279.4	279.2	279.0	278.9	278.8	278.6	278.6	278.5	278.4	278.4	278.3	278.3	278.3	278.3	278.3	278.3	278.2	277.9	277.7	277.6	277.4	277.3	277.3	277.2	277.2	277.1	276.9	276.8	276.7	276.7	276.6
273.1	273.3	273.7	274.2	274.7	275.3	275.8	276.2	276.4	276.6	276.7	276.8	277.0	277.4	277.9	278.5	278.7	278.9	278.8	278.7	278.5	278.4	278.3	278.2	278.2	278.1	278.1	278.0	278.0	278.0	278.1	278.1	278.1	278.1	278.1	278.1	277.9	277.8	277.6	277.4	277.3	277.2	277.1	277.1	277.0	276.8	276.7	276.5	276.4	276.4
272.8	272.8	273.1	273.5	273.9	274.4	274.8	275.2	275.5	275.8	276.1	276.2	276.3	276.4	276.7	277.1	277.4	277.7	277.8	277.8	277.7	277.6	277.6	277.5	277.4	277.4	277.3	277.3	277.3	277.3	277.4	277.5	277.5	277.5	277.5	277.5	277.4	277.3	277.3	277.2	277.1	277.0	276.9	276.9	276.8	276.7	276.5	276.4	276.2	276.2
272.7	272.6	272.7	272.9	273.2	273.5	273.8	274.1	274.4	274.8	275.1	275.3	275.4	275.5	275.7	276.0	276.2	276.4	276.6	276.7	276.7	276.7	276.7	276.6	276.5	276.5	276.4	276.4	276.4	276.5	276.6	276.7	276.7	276.8	276.8	276.9	276.9	276.9	276.9	276.8	276.8	276.7	276.6	276.6	276.5	276.3	276.2	276.1	276.0	276.0
272.8	272.7	272.7	272.6	272.7	272.9	273.1	273.3	273.6	273.9	274.1	274.3	274.4	274.6	274.8	275.0	275.2	275.3	275.5	275.6	275.7	275.7	275.6	275.5	275.5	275.6	275.6	275.7	275.9	276.0	276.1	276.1	276.2	276.3	276.3	276.4	276.5	276.6	276.6	276.6	276.5	276.5	276.4	276.2	276.1	275.9	275.8	275.7	275.6	275.7
272.8	272.8	272.8	272.7	272.6	272.6	272.7	272.9	273.1	273.2	273.4	273.6	273.7	273.9	274.0	274.1	274.3	274.5	274.6	274.7	274.7	274.6	274.6	274.6	274.7	274.8	275.0	275.2	275.3	275.5	275.6	275.8	275.9	276.0	276.1	276.2	276.2	276.3	276.4	276.4	276.3	276.2	276.1	275.9	275.7	275.5	275.3	275.2	275.2	275.2
272.9	272.9	272.9	272.8	272.7	272.7	272.8	272.8	272.9	273.0	273.0	273.1	273.2	273.2	273.4	273.5	273.7	273.8	273.9	273.9	273.8	273.8	273.9	274.0	274.1	274.2	274.4	274.6	274.8	274.9	275.1	275.3	275.5	275.6	275.8	275.9	276.0	276.1	276.2	276.2	276.1	276.0	275.8	275.5	275.2	275.0	274.8	274.7	274.7	274.7
272.7	272.7	272.7	272.7	272.7	272.7	272.8	272.8	272.9	273.0	273.0	273.0	272.9	272.9	272.9	272.9	273.1	273.2	273.4	273.4	273.4	273.4	273.5	273.6	273.7	273.8	274.0	274.1	274.2	274.4	274.5	274.7	274.9	275.2	275.3	275.5	275.6	275.8	275.8	275.9	275.7	275.6	275.3	274.9	274.6	274.5	274.4	274.4	274.3	274.3
272.4	272.4	272.5	272.5	272.5	272.6	272.6	272.6	272.7	272.8	273.0	273.0	273.0	273.0	272.9	272.8	272.8	272.8	272.9	273.0	273.1	273.1	273.2	273.2	273.3	273.5	273.6	273.7	273.8	273.9	274.1	274.2	274.4	274.6	274.8	275.0	275.2	275.3	275.3	275.3	275.0	274.8	274.5	274.3	274.1	274.0	274.0	274.0	274.0	274.1
272.2	272.2	272.3	272.4	272.4	272.5	272.5	272.5	272.6	272.7	272.8	272.9	272.9	273.0	272.9	272.9	272.8	272.8	272.8	272.8	272.8	272.9	272.9	273.0	273.1	273.2	273.4	273.5	273.6	273.7	273.7	273.8	273.9	274.1	274.3	274.4	274.5	274.5	274.5	274.3	274.2	274.0	273.8	273.7	273.7	273.7	273.7	273.8	273.8	273.9
272.1	272.2	272.2	272.3	272.4	272.4	272.5	272.5	272.5	272.5	272.6	272.6	272.7	272.8	272.8	272.8	272.8	272.8	272.8	272.8	272.7	272.7	272.8	272.9	273.0	273.1	273.2	273.3	273.3	273.3	273.3	273.3	273.4	273.5	273.6	273.6	273.6	273.6	273.5	273.5	273.5	273.4	273.4	273.4	273.4	273.5	273.5	273.6	273.7	273.7
272.1	272.2	272.2	272.3	272.3	272.4	272.4	272.4	272.4	272.4	272.5	272.5	272.6	272.6	272.7	272.7	272.8	272.8	272.8	272.7	272.7	272.7	272.8	272.8	272.9	272.9	272.9	273.0	273.0	273.0	273.0	273.1	273.1	273.1	273.2	273.2	273.1	273.1	273.1	273.2	273.2	273.2	273.3	273.3	273.3	273.3	273.4	273.4	273.4	273.5
272.0	272.0	272.1	272.1	272.1	272.1	272.2	272.2	272.3	272.3	272.4	272.5	272.5	272.6	272.6	272.7	272.7	272.7	272.7	272.7	272.6	272.6	272.6	272.6	272.6	272.6	272.7	272.7	272.8	272.9	272.9	273.0	273.0	273.0	273.0	273.0	273.0	273.0	273.1	273.1	273.2	273.2	273.2	273.3	273.3	273.3	273.2	273.2	273.2	273.2
272.0	272.0	272.0	272.1	272.1	272.1	272.1	272.2	272.2	272.3	272.3	272.4	272.4	272.5	272.5	272.5	272.4	272.5	272.5	272.5	272.5	272.4	272.4	272.4	272.4	272.4	272.5	272.6	272.7	272.8	272.8	272.8	272.9	272.9	272.9	272.9	273.0	273.0	273.1	273.1	273.1	273.2	273.2	273.2	273.2	273.2	273.2	273.1	273.1	273.1
272.1	272.1	272.1	272.1	272.1	272.1	272.1	272.1	272.2	272.2	272.3	272.3	272.3	272.2	272.2	272.1	272.1	272.1	272.1	272.2	272.3	272.3	272.3	272.3	272.4	272.4	272.5	272.5	272.6	272.7	272.7	272.7	272.8	272.8	272.9	272.9	273.0	273.0	273.1	273.1	273.1	273.2	273.2	273.2	273.2	273.2	273.2	273.1	273.1	273.1
272.1	272.0	272.0	272.1	272.1	272.1	272.2	272.2	272.1	272.1	272.1	272.1	272.0	271.9	271.9	271.8	271.8	271.9	272.0	272.1	272.2	272.3	272.3	272.3	272.3	272.4	272.5	272.5	272.6	272.7	272.7	272.7	272.7	272.8	272.8	272.9	272.9	273.0	273.0	273.0	273.0	273.0	273.0	273.0	273.0	273.0	273.0	273.0	273.0	273.0
272.0	272.0	272.0	272.0	272.1	272.1	272.1	272.1	272.1	272.1	272.0	271.9	271.8	271.8	271.7	271.7	271.8	271.9	272.1	272.2	272.2	272.3	272.3	272.3	272.4	272.4	272.5	272.5	272.6	272.6	272.6	272.6	272.7	272.7	272.7	272.7	272.8	272.8	272.8	272.8	272.7	272.7	272.7	272.7	272.7	272.7	272.7	272.7	272.6	272.5
272.0	272.0	272.0	272.1	272.1	272.1	272.1	272.1	272.0	272.0	271.9	271.9	271.8	271.8	271.9	271.9	272.0	272.1	272.2	272.2	272.2	272.2	272.3	272.3	272.4	272.4	272.4	272.5	272.5	272.5	272.4	272.4	272.4	272.4	272.5	272.5	272.5	272.5	272.5	272.5	272.5	272.4	272.5	272.6	272.6	272.5	272.4	272.4	272.3	272.2
272.1	272.1	272.1	272.1	272.0	272.0	272.0	271.9	271.9	271.8	271.8	271.8	271.9	271.9	271.9	272.0	272.1	272.2	272.2	272.2	272.2	272.2	272.2	272.3	272.3	272.3	272.3	272.2	272.2	272.2	272.1	272.1	272.1	272.1	272.1	272.1	272.0	271.9	272.0	272.0	272.0	272.1	272.3	272.6	272.6	272.6	272.5	272.4	272.3	272.2
272.1	272.1	272.1	272.0	272.0	272.0	271.9	271.9	271.8	271.8	271.8	271.8	271.8	271.9	271.9	271.9	271.9	272.0	271.9	272.0	272.0	272.1	272.1	272.1	272.1	272.1	272.1	272.2	272.2	272.2	272.3	272.4	272.3	272.3	272.1	271.7	269.9	268.6	267.9	267.6	268.0	269.2	271.8	272.2	272.3	272.4	272.5	272.4	272.4	272.3
272.4	272.3	272.3	272.3	272.3	272.2	272.2	272.2	272.2	272.2	272.2	272.2	272.1	272.0	271.9	271.9	271.9	271.9	271.9	272.0	272.0	272.1	272.1	272.2	272.3	272.4	272.5	272.6	272.6	272.6	272.6	272.7	272.5	272.0	270.2	268.9	267.8	266.2	264.9	264.9	265.4	266.9	268.5	271.1	271.6	271.7	271.9	272.0	271.9	271.9
273.0	273.0	273.0	273.0	273.0	273.0	272.9	272.9	272.9	272.9	272.8	272.8	272.7	272.6	272.6	272.5	272.5	272.5	272.6	272.6	272.7	272.8	272.7	272.6	272.4	272.2	271.9	271.6	271.6	269.8	269.5	269.2	268.4	267.0	265.7	264.9	264.2	263.1	262.1	262.4	263.0	264.1	265.4	266.2	266.4	266.6	267.0	267.4	267.6	267.8
273.7	273.7	273.6	273.6	273.5	273.5	273.4	273.4	273.3	273.3	273.2	273.1	273.1	273.2	273.2	273.3	273.4	273.4	273.5	273.4	273.2	273.0	272.6	271.8	268.8	267.4	266.2	265.1	265.2	265.2	265.1	264.9	264.4	263.6	262.7	261.5	260.3	259.7	259.2	259.5	260.0	260.4	260.9	261.2	261.3	261.4	261.8	262.2	262.5	262.8
273.9	273.9	273.8	273.8	273.8	273.7	273.7	273.7	273.6	273.4	273.1	273.0	272.5	272.5	272.7	273.3	273.4	273.5	273.3	272.8	271.1	268.7	268.0	266.6	264.8	263.2	262.2	261.1	260.9	260.6	260.6	260.8	260.7	260.2	259.7	258.7	257.6	256.8	256.3	256.0	256.1	256.2	256.2	256.1	256.1	256.2	256.4	256.8	257.2	257.7
274.3	274.3	274.3	274.2	274.1	274.0	273.7	273.5	272.5	272.2	271.7	271.0	270.4	270.2	270.0	270.0	270.3	270.7	271.4	271.0	269.0	267.4	265.9	264.1	262.2	260.8	259.7	258.6	258.2	257.8	257.6	257.5	257.5	257.1	256.6	256.0	255.2	254.4	253.8	253.3	253.0	252.8	252.5	252.6	252.6	252.8	253.2	253.6	254.2	254.9
[truncated: 150 more columns]
