# Supplementary material for: Temperature Field Data Reconstruction Using the Sparse Low-Rank Matrix Completion Method
Source: Hindawi journal article supplement (doi:10.1155/2019/3676182), 2019-11-03
Supplement: f1 [file 3676182.f1.zip › data/ERA Interim/Tabel LRC-MC.xlsx]

## Sheet: Sheet1
		24.75	25.5	26.25	27	27.75	28.5	29.25	30	30.75	31.5	32.25	33	33.75	34.5	35.25	36	36.75	37.5	38.25	39	39.75	40.5	41.25	42	42.75	43.5	44.25	45	45.75	46.5	47.25	48	48.75	49.5	50.25	51	51.75	52.5	53.25	54	54.75	55.5	56.25	57	57.75	58.5	59.25	60
	79.5	256.081	256.473	257.444	256.401	255.775	255.217	255.41	255.868	255.813	257.984	256.08	256.605	257.249	258.339	257.672	257.47	258.711	257.609	256.994	256.825	255.499	254.731	253.744	252.668	252.412	251.142	250.686	250.239	250.799	250.316	250.014	250.402	250.491	250.116	251.095	251.014	251.582	251.09	250.401	248.874	248.493	247.474	247.93	247.738	247.773	247.734	247.978	248.472
	78.75	258.056	256.928	256.894	257.341	256.968	257.042	257.253	257.646	258.334	258.342	258.22	257.525	257.809	258.022	257.816	257.576	256.938	257.117	256.486	256.127	255.935	255.458	255.267	255.112	254.937	254.228	253.395	253.081	252.255	252.177	251.783	252.238	252.571	252.898	252.499	253.023	253.124	252.836	252.572	251.442	250.991	250.674	250.453	250.071	250.309	250.61	251.328	251.809
	78	261.241	261.142	261.109	261.181	261.166	261.979	262.31	262.452	262.639	262.508	261.707	261.392	261.075	260.682	259.479	258.97	258.39	258.283	258.114	257.764	258.323	258.227	259.147	259.78	259.406	258.536	257.79	257.92	257.363	256.952	255.949	255.891	255.751	255.469	254.072	254.015	253.574	253.201	252.785	251.572	251.817	252.156	252.294	252.79	254.033	255.435	256.308	257.532
	77.25	264.244	264.74	264.351	263.872	264.068	264.621	264.603	265.132	264.446	264.258	264.161	264.109	263.875	263.539	262.227	261.94	261.395	261.132	260.886	260.457	260.752	260.47	260.261	260.27	260.377	260.18	259.708	260.152	259.839	259.455	258.749	258.973	258.824	258.94	257.3	257.072	257.006	256.569	256.765	256.892	257.238	257.255	257.347	257.858	258.94	259.609	259.713	259.344
	76.5	267.054	266.848	266.928	266.581	266.482	266.903	267.259	267.684	267.477	266.674	266.364	266.115	265.654	264.104	263.82	263.594	263.312	262.455	262.001	261.689	261.371	260.959	260.563	260.799	260.653	260.404	260.358	261.076	260.758	260.486	259.86	259.964	260.343	260.428	259.155	257.906	257.8	257.925	259.336	259.843	259.834	260.235	259.825	258.937	258.598	258.231	258.106	256.871
	75.75	267.555	267.767	268.151	267.977	267.963	267.694	267.929	268.34	268.331	268.106	266.984	266.687	266.35	265.934	264.938	264.679	264.379	263.898	263.313	262.693	262.1	261.539	260.627	261.066	260.599	260.353	260.399	261.555	261.403	261.322	260.88	261.407	261.886	262.145	260.877	259.845	259.791	259.596	259.392	259.501	259.619	259.7	259.266	258.946	258.796	258.08	254.45	253.844
	75	269.388	269.342	269.533	268.975	268.913	268.978	268.993	269.018	268.828	267.644	267.343	267.243	267.065	266.321	266.264	265.301	264.779	264.04	262.936	262.076	262.105	262.102	261.07	261.06	260.849	260.634	260.962	262.061	261.845	261.908	261.409	262.038	262.892	263.384	262.748	262.075	261.797	261.239	260.436	260.557	259.652	258.973	258.064	251.613	251.251	250.602	249.687	249.141
	74.25	270.08	270.004	270.287	269.874	269.757	269.757	269.667	269.482	269.045	268.228	267.033	267.148	267.122	267.11	267.339	265.607	265.007	263.813	263.966	263.27	263.141	262.256	261.653	261.551	261.625	261.618	261.943	262.898	262.965	262.978	262.859	263.328	263.49	264.147	263.551	262.726	261.569	259.846	258.11	258.241	257.807	251.775	250.186	249.925	250.207	248.579	247.063	246.242
	73.5	270.626	270.683	270.134	270.445	270.887	270.531	269.831	269.586	269.579	269.779	267.867	267.181	267.047	266.764	267.486	267.093	266.584	265.354	265.412	264.267	264.691	263.708	262.945	262.985	263.381	263.17	262.954	263.467	263.651	263.643	263.212	262.727	262.685	263.357	263.868	263.423	262.195	261.152	258.612	256.047	249.838	250.119	247.633	246.956	247.28	247.317	246.954	246.229
	72.75	272.042	271.972	272.184	272.035	271.89	272.219	272.247	272.584	271.595	269.948	269.143	268.649	268.495	267.226	268.262	267.958	268.178	266.628	267.338	266.285	266.608	265.179	264.814	264.179	264.433	264.515	264.138	264.57	264.187	263.98	263.407	263.64	263.687	263.914	263.002	261.162	260.445	260.751	251.52	248.772	248.304	248.41	247.464	247.035	246.743	246.353	246.611	246.702
	72	272.455	271.804	271.318	271.031	270.793	270.516	270.548	271.164	271.438	271.075	269.553	269.089	269.08	268.842	269.217	268.132	268.28	267.67	267.882	266.98	267.427	265.914	265.552	264.986	265.285	265.229	264.434	264.804	264.483	264.1	264.528	264.875	263.962	263.91	261.87	261.065	251.884	250.507	248.844	246.263	245.473	245.671	246.89	246.084	246.12	245.935	245.933	246.45
	71.25	270.741	270.744	269.855	269.358	268.789	268.442	268.792	269.747	270.971	270.565	269.781	269.176	269.383	268.886	268.836	267.336	267.468	266.985	267.553	266.672	266.556	266.389	265.139	265.331	265.171	264.379	264.208	265.159	264.881	263.994	262.725	261.591	261.66	260.796	258.669	256.931	255.847	255.873	246.533	245.894	244.694	243.974	242.761	244.709	245.611	246.699	246.852	246.921
	70.5	268.327	268.297	267.614	267.63	267.233	267.079	267.757	268.82	270.119	269.727	269.114	269.179	269.606	268.775	268.302	266.552	266.779	266.194	266.177	265.561	265.381	264.242	263.84	263.642	264.34	263.966	263.989	264.48	264.689	263.524	261.91	260.998	260.292	260.018	257.569	257.209	256.257	255.439	253.635	252.005	249.643	248.383	247.682	248	247.966	248.312	247.972	247.625
	69.75	266.756	266.618	266.15	266.409	266.414	266.324	266.998	267.678	268.486	267.759	267.861	268.509	269.098	267.378	266.706	265.854	266.353	265.738	265.726	264.229	263.447	263.09	262.735	263.027	262.336	262.286	262.139	262.909	262.559	261.443	260.203	259.442	259.418	258.209	255.685	256.763	255.655	256.254	256.114	253.051	252.082	252.488	252.183	251.583	251.364	250.952	250.489	248.899
	69	265.675	265.97	265.709	266.306	266.096	266.504	266.865	267.399	267.79	267.588	266.136	266.058	265.989	265.512	264.664	263.146	262.041	262.223	263.122	263.221	263.923	262.659	263.094	262.097	261.031	259.685	258.397	258.277	259.196	257.976	256.241	254.854	250.25	252.43	255.45	257.486	256.882	255.232	253.055	250.763	249.805	249.412	248.484	248.541	249.353	249.849	249.729	249.15
	68.25	266.742	267.134	266.828	266.977	267.04	266.429	266.388	266.493	266.198	265.614	265.209	264.11	264.216	264.069	263.86	262.702	262.73	262.346	263.111	262.886	263.907	263.112	262.389	261.647	260.561	259.366	252.709	250.871	252.027	256.777	254.476	252.954	254.788	253.178	252.547	248.828	249.911	250.691	250.136	249.599	249.788	248.931	248.767	249.051	250.007	250.082	249.753	249.687
	67.5	269.767	270.442	270.031	269.685	269.103	268.467	268.585	268.804	268.547	267.935	266.821	265.403	265.153	265.102	264.846	263.532	263.361	263.384	263.024	261.258	259.647	258.119	261.678	261.432	260.742	259.805	252.581	252.75	257.714	259.014	258.279	252.527	251.324	250.822	249.873	249.923	250.153	250.663	250.677	250.674	250.436	250.584	250.644	250.021	250.765	251.348	251.045	251.94
	66.75	272.2	272.492	271.662	270.053	269.294	268.506	268.684	268.722	268.541	267.792	266.628	265.944	265.811	264.442	264.304	263.479	262.569	261.986	262.033	262.131	261.673	261.473	261.805	260.764	259.951	259.217	258.612	254.918	254.711	254.963	253.671	252.892	251.312	252.123	251.868	251.742	251.713	251.202	251.572	252.336	252.529	252.599	252.548	251.697	251.927	252.881	252.625	253.227
	66	272.748	272.869	272.209	271.504	270.175	268.95	268.898	269.198	268.572	268.475	268.209	267.332	267.53	267.577	267.933	266.92	267.11	266.001	265.011	264.407	263.892	261.829	260.616	260.073	259.662	258.965	258.229	257.735	257.073	255.465	254.075	253.577	253.473	252.653	251.696	252.123	251.421	251.304	251.898	252.392	252.778	252.921	252.287	251.648	252.197	253.079	253.421	253.816
	65.25	274.144	273.857	273.515	272.378	271.157	270.7	270.806	271.032	270.2	269.797	269.042	269.328	269.721	270.284	270.133	269.814	270.08	268.62	268.751	267.535	266.878	264.09	262.188	261.503	260.859	260.217	258.897	259.166	257.812	256.571	256.355	256.854	256.413	256.655	255.809	254.39	254.027	254.236	253.928	253.427	254.128	253.848	253.092	252.847	253.069	253.848	254.177	254.464
	64.5	274.983	274.073	274.243	273.813	271.826	271.425	271.82	272.474	270.493	270.327	270.636	271.078	271.257	270.094	270.21	270.606	271.042	269.383	269.42	269.181	268.905	266.847	266.178	266.104	266.516	266.207	265.598	265.588	264.288	263.537	262.513	262.864	263.142	261.689	260.455	259.995	259.785	258.271	259.099	259.139	259.369	259.018	258.565	258.237	258.157	259.179	259.497	260.009
	63.75	275.595	274.705	275.183	274.707	274.345	273.716	274.241	274.708	274.212	271.691	271.789	271.818	271.279	270.952	271.134	269.797	270.654	270.247	270.6	269.688	270.868	269.292	269.635	269.814	269.991	270.521	270.449	268.902	268.575	268.449	267.926	267.973	268.191	268	267.206	265.909	265.456	265.309	263.452	262.334	261.87	262.007	261.685	261.287	261.079	262.06	262.486	263.188
	63	275.783	275.959	275.95	275.534	274.213	274.082	274.392	274.499	273.931	273.779	273.976	274.427	273.881	271.625	272.025	272.063	272.964	271.666	272.157	271.707	272.051	272.263	271.911	272.471	273.166	272.01	269.975	270.213	269.992	273.26	272.278	272.101	271.843	271.163	270.347	270.525	270.173	269.026	269.453	269.319	269.554	269.602	268.481	267.92	266.902	266.81	266.663	267.964
	62.25	275.496	276.486	276.047	275.331	274.887	274.555	274.218	274.435	274.31	274.362	274.386	274.102	273.8	273.309	271.629	271.514	272.371	272.724	271.281	271.341	271.004	271.166	272.057	272.17	272.844	273.424	271.515	272.051	273.114	274.114	273.639	273.019	271.45	271.855	270.682	272.358	270.912	270.694	270.033	270.117	270.149	269.759	269.555	268.504	267.967	267.956	267.323	267.132
	61.5	276.79	278.592	278.296	276.773	276.259	275.241	274.679	275.337	275.505	275.319	274.302	275.025	275.122	273.957	272.953	272.711	272.152	274.92	273.379	274.494	272.79	273.101	273.002	274.989	275.359	275.94	276.448	277.192	277.754	276.683	275.185	274.745	274.429	272.9	273.325	274.069	272.507	272.982	274.323	274.85	275.043	275.08	274.905	273.648	272.424	271.433	268.945	268.693
	60.75	279.448	281.109	280.942	278.477	277.466	276.333	276.546	276.019	276.39	276.565	276.432	276.165	276.015	275.231	274.256	274.693	275.026	275.91	275.229	275.285	274.744	275.81	275.56	277.153	277.247	277.519	276.681	278.258	278.582	279.239	277.967	275.628	274.999	275.331	275.749	276.149	275.234	274.201	273.983	274.615	274.412	273.324	273.319	272.002	270.576	271.324	269.577	268.982
	60	280.526	280.027	279.859	278.551	277.406	276.616	276.908	276.455	276.763	276.29	276.084	276.715	276.653	275.833	274.175	275.153	275.718	276.616	276.427	276.224	275.472	277.098	277.487	278.567	278.515	278.225	277.501	278.249	280.01	280.153	277.997	277.055	274.713	274.755	275.06	274.994	274.654	274.243	274.092	274.353	274.348	273.943	274.051	272.354	271.408	270.636	269.49	269.223
	59.25	276.465	277.454	277.292	276.906	276.614	276.107	275.615	275.754	276.057	275.496	275.301	276.047	276.095	275.115	274.605	274.632	276.339	276.983	277.36	276.957	275.68	277.673	278.301	279.276	279.159	278.665	277.576	277.322	279.863	278.206	277.504	276.924	275.396	274.777	275.226	274.876	274.87	273.372	272.993	273.328	272.759	272.347	272.532	271.977	270.93	270.181	269.589	269.33
	58.5	274.319	275.884	275.553	274.462	274.434	274.173	274.326	274.466	274.178	273.381	273.16	273.42	273.671	273.397	273.595	273.981	277.015	276.668	275.915	275.068	275.487	277.189	278.458	278.469	277.684	277.516	277.631	277.45	278.496	277.699	277.02	276.038	274.976	274.428	274.985	274.414	274.272	272.895	272.604	272.625	272.184	272.11	272.429	271.807	271.018	270.152	270.21	269.967
	57.75	272.648	273.299	273.292	272.552	272.417	272.562	273.015	273.607	273.173	272.656	272.468	273.101	273.472	272.981	272.892	274.28	275.482	275.856	276.647	276.22	275.421	275.931	277.605	278.118	277.768	277.449	277.71	277.657	278.07	276.889	275.911	275.709	274.837	274.357	274.885	274.333	274.187	272.617	272.756	272.561	271.544	271.715	272.25	271.666	270.988	270.357	270.709	270.804
	57	270.753	271.393	271.68	271.212	271.743	272.089	272.292	272.83	273.37	273.764	273.537	273.501	273.952	274.001	273.807	274.72	275.654	275.944	276.08	276.423	275.196	276.772	277.567	278.13	277.449	276.813	275.932	277.352	277.678	276.159	275.288	274.274	273.961	273.505	273.665	273.06	272.117	272.114	272.115	272.11	271.936	271.704	271.398	271.171	270.034	270.043	270.282	271.008
	56.25	269.52	270.082	270.559	270.717	271.449	271.828	272.258	272.493	273.673	274.518	274.162	274.029	274.508	274.406	274.742	274.787	275.776	276.233	276.246	275.775	275.292	276.004	276.356	277.664	276.541	275.085	274.667	275.395	276.509	275.475	274.482	273.819	273.077	272.397	273.007	272.717	272.544	271.252	271.65	271.354	270.781	270.329	270.442	269.043	268.544	268.041	269.074	269.88
	55.5	269.178	270.373	271.111	271.124	271.439	271.58	272.584	273.025	274.148	273.732	273.492	273.464	274.127	274.298	274.193	275.025	275.132	275.788	276.539	275.837	275.389	275.638	276.349	276.322	275.346	274.058	273.925	274.513	275.254	274.751	273.441	272.602	271.8	271.967	272.77	273.411	272.93	272.469	271.924	271.03	270.073	269.391	268.958	267.89	267.135	266.594	267.849	268.33
	54.75	270.355	271.053	271.477	271.311	271.388	271.491	271.928	272.638	273.209	273.44	273.193	272.965	273.874	274.189	274.143	275.015	275.728	275.599	276.212	275.173	274.519	274.648	275.922	276.111	274.93	274.114	273.864	274.354	275.298	274.974	273.565	272.544	272.686	272.966	272.941	272.794	272.546	271.983	271.954	270.93	270.193	269.855	269.034	267.929	266.551	266.051	267.066	268.225
	54	272.323	271.109	270.974	270.89	271.387	271.975	271.9	272.281	272.678	272.495	271.789	272.589	273.517	273.51	273.428	273.942	275.415	275.534	275.563	274.936	274.472	274.47	275.235	275.645	274.711	274.162	274.18	274.079	274.982	274.313	273.539	272.472	272.411	272.893	272.804	273.034	272.383	271.299	271.492	269.985	269.403	268.146	268.126	266.924	266.444	266.355	267.517	267.908
	53.25	270.87	271.504	271.603	271.496	271.279	271.411	271.429	272.013	272.69	271.93	272.001	272.326	273.313	273.379	273.359	273.5	275.407	275.206	275.523	273.973	273.773	274.049	274.578	275.213	274.838	274.614	274.788	274.121	274.964	274.14	273.574	272.8	272.685	272.798	273.005	273.063	272.057	270.878	271.14	269.703	268.333	267.823	267.465	266.635	266.576	266.288	267.843	267.684
	52.5	274.468	272.936	272.835	273.159	272.862	272.295	271.781	271.432	271.916	270.827	270.468	270.63	271.637	271.628	271.934	272.105	273.404	274.095	274.752	273.604	273.617	273.05	274.056	274.767	275.03	274.006	275.109	273.898	274.593	273.246	273.003	272.976	272.699	272.585	272.348	272.032	271.844	271.158	270.809	268.962	267.322	266.905	266.843	265.353	265.261	265.481	266.083	266.067
	51.75	272.345	272.993	272.766	272.886	272.405	272.206	272.675	272.189	272.263	271.686	271.743	271.609	272.494	272.358	272.268	272.219	273.238	273.613	274.231	273.321	273.414	272.477	273.78	273.764	274.639	274.481	275.121	273.462	273.38	272.425	272.573	272.442	272.324	271.808	271.843	271.314	271.509	271.281	269.624	267.351	266.885	266.666	265.973	264.986	265.3	264.991	265.69	265.499
	51	273.835	272.549	272.403	272.549	272.028	271.495	271.432	271.223	271.112	270.836	270.243	271.155	271.595	271.349	271.45	271.451	272.827	273.45	273.057	271.883	271.404	272.653	273.478	275.084	274.678	273.382	274.253	273.061	273.44	272.903	272.613	272.27	272.06	271.634	271.682	271.467	270.753	270.232	268.589	266.581	266.339	266.541	266.375	265.916	266.113	265.556	266.515	265.648
	50.25	272.019	271.647	271.749	272.375	271.808	271.127	271.034	271.135	270.976	270.272	270.78	271.034	271.684	271.723	271.941	271.899	272.573	273.336	273.331	272.483	272.271	272.477	272.794	274.207	274.64	274.769	274.752	273.276	273.927	273.268	272.909	272.511	272.642	272.035	271.875	271.399	270.149	268.998	267.172	265.533	265.23	265.534	266.082	266.026	266.395	266.362	266.909	266.968
	49.5	272.368	273.173	272.959	272.687	271.782	271.065	271.478	271.757	272.466	271.937	272.364	272.637	272.773	273.018	273.595	273.201	274.525	274.297	273.747	272.591	272.708	273.217	274.101	275.048	274.794	274.588	274.258	273.254	273.002	272.558	272.571	272.917	272.765	271.867	271.831	271.276	269.503	266.411	264.813	263.061	263.449	263.772	264.723	265.847	266.182	266.149	266.828	267.31
	48.75	272.532	273.66	273.606	273.664	272.803	272.111	273.484	273.625	273.82	273.83	274.678	274.009	274.469	274.629	275.406	275.005	275.705	275.245	274.685	273.641	273.223	274.065	275.242	275.429	274.937	274.5	275.213	275.018	274.477	273.63	273.67	273.298	272.969	271.636	270.449	269.264	268.516	266.873	264.536	262.466	262.793	263.319	264.605	266.044	266.498	266.24	267.134	267.894
	48	272.998	273.247	273.937	274.728	274.336	273.816	273.75	273.563	273.614	272.993	273.81	274.656	275.309	275.002	275.606	275.806	275.852	275.513	275.244	274.928	274.484	274.62	275.884	277.273	277.275	277.057	276.54	275.442	274.971	274.08	273.147	271.787	271.501	270.711	269.566	268.927	269.003	268.13	266.454	264.053	263.458	264.424	265.823	266.936	267.273	267.773	267.986	268.46
	47.25	271.829	271.965	272.773	274.067	274.506	274.216	273.615	273.111	272.701	272.909	273.4	273.989	274.961	275.435	276.122	275.741	275.767	275.623	275.92	276.061	275.292	275.277	276.099	277.805	278.247	278.262	277.384	276.182	275.634	274.852	273.057	271.564	271.602	271.54	270.956	269.801	269.13	268.931	267.265	265.867	264.629	267.569	268.478	268.48	268.746	268.822	268.156	268.085
	46.5	272.638	272.513	272.338	273.168	273.816	273.637	273.081	272.526	272.686	272.931	273.586	274.29	275.332	275.753	276.403	276.47	276.705	276.235	277.422	277.351	278.07	278.42	277.471	276.917	276.5	275.957	275.138	274.64	274.314	274.234	273.033	271.782	271.599	272.284	272.857	272.184	271.506	268.873	266.83	266.346	264.874	268.293	268.82	268.281	267.746	268.863	267.923	267.762
	45.75	272.352	272.993	272.836	273.609	274.172	273.994	273.662	273.687	274.277	274.198	274.922	274.989	275.84	276.3	277.85	277.806	277.844	277.483	278.235	278.038	278.407	278.619	277.416	275.622	274.365	274.013	274.11	274.629	275.186	274.502	273.697	272.785	272.963	273.798	275.092	274.363	273.314	269.46	266.78	265.789	267.12	267.46	267.97	268.26	267.854	268.239	267.167	267.722
	45	272.751	272.562	272.969	273.844	274.5	275.04	276.286	277.077	277.577	277.908	278.097	276.816	277.126	277.301	278.254	278.998	279.438	278.399	277.395	276.927	274.915	273.636	273.403	273.342	273.346	274.657	276.79	277.193	277.626	276.381	274.433	273.145	274.265	275.047	276.085	274.526	273.272	270.814	268.447	267.399	267.203	266.385	266.506	266.369	264.66	265.498	265.717	265.125
	44.25	273.745	273.159	273.757	275.008	275.644	276.519	277.857	279.306	280.022	280.317	279.941	279.22	278.999	278.889	279.771	280.097	280.827	279.98	279.843	276.155	273.691	272.372	272.689	271.756	272.12	274.238	277.233	278.051	277.988	277.249	275.327	275.544	276.519	276.866	276.604	275.252	273.738	270.932	269.397	266.355	266.558	265.709	265.875	265.971	264.273	266.438	266.053	265.13
	43.5	274.316	274.557	274.353	274.983	275.551	276.985	278.484	279.829	280.564	280.226	280.577	280.495	280.991	280.817	280.505	280.32	281.411	281.969	281.441	280.69	280.933	275.373	272.511	268.104	266.993	269.482	273.763	275.662	274.883	274.336	274.463	275.174	276.235	276.963	278.266	278.486	274.205	271.565	267.826	266.75	268.557	268.794	268.123	266.599	265.082	265.986	264.798	265.187
	42.75	275.044	275.586	275.008	275.556	276.519	278.063	279.17	279.979	280.746	279.835	279.905	279.845	279.787	279.892	280.217	281.729	282.41	282.532	281.642	280.678	280.991	280.745	278.617	268.185	264.585	263.771	267.483	269.486	270.687	271.211	271.43	277.493	278.137	278.724	278.053	277.564	275.84	272.013	265.913	266.932	268.91	269.27	268.512	266.579	265.757	265.285	265.032	264.904
	42	274.317	275.022	276.69	278.626	279.221	279.355	280.79	282.161	281.607	280.981	279.85	276.678	275.092	274.71	278.868	279.846	281.011	280.894	282.487	282.977	282.451	281.878	279.022	270.059	266.827	264.183	264.635	267.013	270.192	268.072	268.218	270.165	276.842	277.298	275.959	275.53	275.006	267.455	263.902	263.771	265.678	266.574	265.404	264.578	264.685	264.35	264.38	264.456
	41.25	276.336	276.687	277.753	279.499	281.243	281.384	281.391	281.062	281.364	278.947	277.357	275.764	274.899	274.54	274.795	276.422	276.845	279.68	279.658	280.591	277.025	278.384	270.941	268.735	263.73	262.395	263.153	269.354	273.498	273.574	272.644	272.948	274.876	277.952	276.754	275.766	274.24	270.608	264.575	265.157	265.26	265.13	264.685	265.411	265.769	265.633	265.452	265.67
	40.5	279.324	279.321	280.448	281.29	281.281	281.212	279.693	278.819	277.788	276.982	275.465	275.934	276.527	275.987	274.871	275.684	275.838	274.932	272.83	272.346	270.367	269.753	269.228	269.06	267.569	267.973	270.575	271.888	270.894	272.631	274.223	274.553	274.94	275.139	276.266	277.314	276.294	273.564	267.852	267.491	267.178	267.017	266.975	267.612	268.117	267.91	267.211	267.31
	39.75	284.528	283.115	282.503	282.09	280.814	279.99	278.506	277.601	276.805	276.444	276.121	275.685	275.789	275.247	275.184	273.773	273.912	273.817	271.108	269.468	266.851	267.279	268.203	269.987	271.094	273.07	274.154	274.357	272.243	272.01	273.72	274.002	274.24	276.823	276.557	276.615	276.879	276.122	272.971	269.348	269.103	268.918	268.706	268.965	269.529	269.232	267.718	266.668
	39	286.465	284.62	284.083	282.462	281.498	278.464	277.101	276.716	276.449	277.107	276.924	276.602	276.445	275.079	274.09	272.759	273.297	272.401	272.571	271.587	271.524	271.479	272.007	273.078	272.212	272.147	272.81	272.831	273.075	273.102	271.727	271.873	274.074	278.255	278.18	276.318	275.53	275.336	272.457	269.445	268.259	267.84	267.505	267.685	268.468	268.706	267.578	266.692
	38.25	283.495	285.532	285.57	283.571	280.569	278.425	277.992	276.062	277.187	278.164	277.216	277.332	276.935	275.061	275.645	275.012	276.025	273.719	274.992	274.785	276.924	277.289	277.055	277.035	275.38	273.238	272.629	271.835	272.896	272.146	270.181	269.818	272.08	277.721	276.902	274.193	273.109	273.108	271.654	269.369	267.264	266.652	265.366	265.22	267.634	269.017	268.392	267.064
	37.5	288.053	288.198	287.022	286.676	283.054	282.478	280.469	279.427	276.809	276.204	277.148	278.253	277.288	276.684	277.974	279.628	278.643	278.477	278.063	278.686	278.625	279.203	278.663	278.59	278.806	276.948	277.064	272.253	271.789	270.402	272.004	271.339	275.929	275.729	274.612	272.703	272.4	273.983	272.739	269.643	265.944	264.095	262.871	262.995	264.692	264.739	265.17	265.416
	36.75	288.18	287.169	287.248	287.642	286.447	286.043	283.645	281.334	281.025	278.665	277.28	277.243	277.739	281.405	281.743	282.587	279.628	280.161	279.931	280.653	281.549	282.083	282.249	284.56	285.58	285.691	282.896	278.259	273.425	269.41	271.716	272.343	271.924	268.835	268.005	270.209	271.015	274.094	270.915	269.941	266.771	264.925	264.432	265.038	266.632	267.144	266.413	265.349
	36	286.226	286.169	285.292	285.649	285.289	284.875	284.595	284.558	284.326	284.305	281.872	281.487	281.425	281.938	282.04	282.972	282.936	279.849	281.166	282.861	283.144	283.863	283.727	285.08	285.319	286	284.817	280.874	276.386	272.18	272.625	272.678	271.754	269.911	269.109	269.379	269.179	268.92	270.275	269.923	268.865	269.205	268.938	267.969	267.806	267.802	266.669	265.49
	35.25	285.754	286.042	285.58	286.88	287.194	287.301	286.882	286.193	285.94	285.459	285.156	287.844	286.464	287.456	285.965	284.74	279.597	279.732	280.17	281.92	283.818	285.496	284.811	285.352	285.72	286.438	286.774	285.365	280.008	275.397	272.714	273.007	272.303	270.187	271.67	272.369	270.935	270.511	271.267	272.306	272.976	272.654	270.281	269.64	269.066	269.181	270.677	268.39
	34.5	287.643	287.465	287.069	287.457	287.709	287.373	287.364	286.902	287.007	286.261	286.007	287.024	286.758	287.61	285.167	282.16	279.616	279.583	280.644	282.767	284.288	285.052	284.142	284.887	285.399	287.061	287.665	286.797	282.724	277.008	274.784	274.128	272.804	272.273	272.49	274.329	274.67	274.054	274.891	276.361	276	275.106	273.352	271.915	270.207	269.739	270.153	271.058
	33.75	290.301	289.163	288.987	288.511	287.454	287.366	287.197	286.803	286.671	286.102	286.228	286.046	286.517	286.368	284.868	279.913	278.757	279.581	280.499	282.372	283.557	284.19	283.118	283.925	284.852	286.685	286.81	286.869	283.809	279.389	277.832	276.619	274.664	273.71	275.295	275.974	277.551	279.079	279.098	279.768	278.652	277.313	274.99	274.287	272.776	270.495	268.598	269.705
	33	290.035	288.926	289.01	288.582	287.095	286.498	286.022	285.349	285.929	285.903	285.463	285.54	286.757	286.94	284.802	280.224	277.973	278.929	279.753	280.801	282.038	283.367	282.96	283.864	284.278	285.117	284.672	284.819	284.229	282.575	281.774	280.688	278.395	275.618	275.04	276.985	279.264	281.022	281.635	281.731	279.935	278.57	276.993	277.136	276.255	273.057	268.642	269.407
	32.25	289.182	289.061	288.938	288.296	287.29	286.417	286.069	285.025	284.901	284.599	285.578	285.72	286.543	285.677	282.585	281.212	280.052	280.039	278.681	280.451	280.687	283.116	283.039	283.624	283.547	283.786	282.971	283.732	284.093	285.056	284.468	284.217	283.39	279.991	277.212	277.838	280.678	282.751	282.281	282.201	280.467	279.514	278.473	279.253	278.33	275.338	271.215	272.73
	31.5	290.507	289.247	288.891	288.287	287.945	286.687	286.04	284.9	283.817	284.071	282.703	283.88	285.617	281.32	280.724	281.225	280.634	281.032	279.4	279.882	279.853	282.442	282.096	282.681	282.349	282.091	281.85	282.936	282.562	283.76	285.306	286.97	287.713	286.654	282.282	279.953	280.418	281.913	282.102	281.295	280.262	279.699	277.825	278.51	280.688	277.346	273.956	273.966
	30.75	290.135	289.209	288.69	287.772	286.897	287.795	287.557	286.499	284.474	283.167	282.292	280.923	280.952	280.185	279.78	280.308	280.983	281.749	280.143	280.106	280.079	281.986	281.91	282.099	281.26	281.205	280.905	282.577	281.184	282.436	284.346	287.884	289.862	291.118	288.596	283.748	282.37	281.894	281.93	280.809	280.422	280.021	276.513	277.345	279.518	279.741	275.967	274.295
	30	287.871	287.7	288.218	287.911	287.918	286.768	286.096	284.751	285.133	283.72	282.158	280.228	280.303	280.102	280.137	280.909	280.317	280.013	280.156	280.707	279.132	281.192	281.859	282.409	281.475	281.116	280.322	281.418	280.379	281.16	283.091	286.53	289.258	292.317	291.358	290.434	286.67	283.758	282.036	281.607	280.127	278.488	275.947	273.294	275.78	278.419	276.147	272.746
	29.25	288.6	287.587	288.092	287.754	288.022	285.801	285.181	284.87	286.385	284.533	283.524	281.523	279.432	280.307	280.607	280.929	280.822	280.55	281.466	282.029	280.09	281.459	281.729	282.812	282.071	281.635	281.153	281.478	281.473	281.956	282.65	285.14	288.08	291.785	294.084	294.73	290.828	286.552	282.752	281.112	279.972	278.012	274.8	272.622	273.19	275.17	275.172	271.325
	28.5	287.224	285.774	286.915	286.35	285.064	283.005	284.749	285.701	287.092	284.069	283.6	282.262	282.607	283.843	282.879	279.898	279.925	280.738	281.31	281.44	280.709	281.872	281.629	282.369	282.045	281.671	281.126	282.032	284.343	285.161	284.237	285.569	289.887	293.775	296.13	295.273	292.212	286.813	284.119	281.71	279.562	279.313	277.282	276.283	277.458	276.253	275.129	273.062
	27.75	287.125	285.914	284.83	283.615	282.716	282.942	282.484	285.102	285.44	282.982	281.907	283.573	287.599	290.678	288.644	282.097	279.129	280.204	280.771	281.636	281.159	281.779	282.117	282.404	282.655	282.684	282.525	283.396	286.651	287.628	285.212	285.64	289.033	292.022	293.13	292.467	291.518	286.147	282.67	280.353	278.461	281.1	282.184	274.871	276.18	276.543	274.574	272.356
	27	285.694	285.569	284.619	283.39	282.306	281.858	283.615	286.11	286.111	283.218	283.327	284.059	288.245	293.964	293.783	287.398	282.598	281.946	281.805	281.955	281.851	282.678	283.265	283.698	284.356	283.835	283.763	284.753	286.61	287.256	287.239	287.205	289.432	291.5	292.312	292.395	292.387	290.924	286.604	283.879	285.317	286.095	288.855	279.294	275.963	277.444	274.903	273.268
	26.25	284.797	285.524	284.447	284.131	282.835	283.654	284.285	284.317	283.609	285.494	284.86	286.523	287.757	292.607	295.055	293.093	287.508	284.472	283.593	283.064	281.724	283.096	283.596	284.092	284.418	284.719	284.971	285.475	285.989	286.966	287.27	288.245	288.627	289.148	290.202	290.375	291.53	291.654	289.593	287.586	286.741	287.479	288.3	286.851	279.514	274.446	273.891	271.817
	25.5	282.148	281.833	281.947	283.064	280.621	280.882	281.644	281.134	282.246	281.785	283.998	286.198	285.238	286.471	291.948	293.665	291.744	286.828	284.105	283.95	282.082	282.791	283.481	284.329	285.265	285.355	285.989	286.66	287.591	288.391	289.416	289.263	288.35	287.2	287.473	287.408	289.794	290.868	290.96	289.204	287.851	284.888	282.86	288.564	287.49	284.77	283.559	278.381
	24.75	283.025	282.257	281.703	282.471	281.127	282.209	283.083	284.261	282.967	283.822	286.151	287.707	286.105	284.682	293.146	295.978	296.737	292.239	289.755	286.95	284.181	284.433	285.029	285.909	287.252	287.092	287.742	288.651	289.597	289.947	290.025	288.412	286.542	285.807	286.734	287.525	290.202	290.053	289.972	290.384	288.17	287.043	284.982	287.564	288.726	287.628	286.761	285.83
	24	282.776	281.415	281.077	281.832	280.944	281.76	282.585	283.391	283.568	283.807	285.399	287.276	286.151	285.631	288.787	295.952	296.557	296.437	293.913	288.712	286.316	285.119	285.596	286.432	286.97	288.148	289.23	289.762	289.587	289.068	288.66	287.522	286.728	285.755	286.388	286.774	288.621	288.685	288.554	287.888	287.123	285.545	285.102	285.484	289.041	288.197	287.928	287.862
	23.25	281.141	280.786	280.438	280.813	280.833	281.607	282.483	283.049	283.687	284.037	285.41	286.292	286.016	285.799	287.079	293.814	296.161	297.353	297.122	290.853	287.97	285.536	285.94	287.005	287.62	288.975	289.513	289.532	289.464	288.373	287.647	286.96	287.038	286.767	286.928	286.764	287.308	287.376	287.465	287.301	287.41	287.538	285.42	284.039	284.23	284.821	287.308	288.738
	22.5	280.455	279.993	279.68	279.983	280.511	281.609	282.334	283.426	283.49	284.12	285.184	285.763	285.991	285.241	285.608	289.633	295.024	295.873	295.637	294.403	287.593	285.19	286.004	288.347	289.181	290.135	289.859	289.699	289.637	288.403	287.84	287.718	288.362	287.861	287.4	286.935	286.49	286.469	286.812	286.559	286.158	285.91	285.4	284.123	283.364	283.478	284.212	290.392
	21.75	279.798	279.717	279.53	279.724	280.843	282.267	282.88	283.694	284.048	284.455	285.02	285.753	286.659	285.897	285.577	286.844	289.845	296.113	297.806	294.743	289.99	285.759	286.853	289.056	290.532	290.99	290.014	289.711	289.607	288.75	288.231	288.479	289.245	288.87	288.023	287.02	286.473	286.519	286.732	286.543	285.721	285.052	284.778	284.347	284.056	283.615	284.235	291.212
	21	280.68	280.794	280.62	280.4	281.294	282.502	283.369	284.439	284.643	285.185	285.715	286.059	287.162	286.958	287.391	287.482	290.398	296.296	297.948	297.428	292.661	289.936	288.629	289.213	290.651	290.925	290.153	290.256	289.967	288.824	288.47	288.379	289.011	288.681	287.808	287.426	287.099	286.898	286.622	286.27	285.899	285.734	285.275	284.722	284.671	285.965	290.943	292.675
	20.25	281.113	281.618	281.296	280.988	281.109	282.342	283.619	284.696	285.149	285.696	285.641	286.304	287.469	288.251	289.452	289.512	290.296	296.924	298.246	298.396	297.895	292.411	291.218	289.267	289.619	290.153	289.649	289.737	289.471	289.376	288.675	288.38	289.238	288.774	288.347	287.82	287.689	286.756	286.244	285.997	286.733	286.719	285.407	285.198	286.228	292.846	293.295	294.383
	19.5	282.298	282.891	282.193	281.783	281.848	283.371	284.499	285.933	285.832	286.413	286.444	287.258	288.159	289.499	290.624	289.742	288.552	294.909	298.375	300.009	299.889	298.209	294.632	290.209	286.755	286.211	287.729	289.201	289.56	288.476	288.643	289.081	289.79	289.41	289.761	289.734	289.508	288.83	288.082	287.07	286.504	285.039	284.74	286.442	288.522	294.944	294.832	293.915
	18.75	282.616	283.428	282.684	282.094	282.182	283.705	285.338	286.057	286.518	286.855	287.38	287.574	288.741	291.012	292.924	291.828	290.404	294.653	297.311	299.331	298.943	298.209	295.515	291.733	287.174	286.145	286.887	288.004	288.453	288.854	289.538	290.411	291.397	291.142	290.58	289.23	288.083	287.245	287.543	287.428	285.965	285.636	288.694	291.987	292.906	293.405	293.231	293.429
	18	283.312	283.468	283.264	283.104	282.952	283.858	285.328	286.119	286.7	287.408	287.461	288.528	290.138	292.634	293.894	293.102	292.575	294.196	294.809	297.97	298.117	297.458	297.996	293.655	289.109	284.783	286.691	288.802	288.677	289.504	289.172	289.296	289.816	289.155	288.947	287.925	287.497	287.189	286.279	286.665	286.589	288.174	293.245	295.257	294.927	294.298	294.32	294.666
	17.25	283.127	283.126	283.231	283.694	283.772	284.569	285.663	286.211	286.959	287.614	288.47	288.987	291.059	292.885	294.335	293.978	294.483	294.017	292.941	295.793	297.244	297.898	298.718	298.453	291.609	287.277	286.732	287.68	287.674	288.319	287.545	287.812	288.493	288.006	288.167	287.607	288.014	288.356	287.25	287.729	288.695	293.718	295.186	295.385	295.532	295.998	295.917	296.118
	16.5	284.177	283.127	282.742	283.078	284.03	285.432	286.122	286.839	286.829	288.163	289.235	289.505	290.516	291.266	293.398	295.205	295.375	294.51	293.106	294.141	298.22	299.743	300.482	299.42	294.678	288.615	285.663	287.664	289.034	289.75	287.941	287.292	287.681	286.852	286.803	286.86	288.46	292.544	293.567	294.126	293.512	293.574	294.209	294.968	295.752	295.987	296.012	295.628
	15.75	283.918	283.43	282.801	283.111	284.595	286.259	286.93	287.095	287.651	288.435	289.639	289.975	289.999	289.844	292.459	294.439	295.354	293.697	291.063	292.528	297.911	300.884	300.5	299.64	296.807	290.993	285.696	286.738	289.086	289.387	287.713	286.677	286.218	286.703	287.81	289.766	292.984	296.453	296.399	295.865	295.809	295.72	295.082	295.125	295.162	295.212	295.557	295.68
	15	284.223	284.019	283.962	284.34	285.67	286.557	286.793	287.076	287.339	288.383	289.498	289.507	289.826	290.343	291.587	292.397	292.404	290.559	288.52	287.77	292.657	296.95	299.425	299.149	298.245	292.285	284.848	285.277	287.376	288.207	287.012	286.701	287.029	287.63	292.537	294.534	294.934	295.393	295.752	295.88	295.811	295.657	295.093	294.96	295.149	295.893	296.195	296.382
	14.25	284	284.876	285.657	286.033	286.394	287.081	286.831	286.825	287.116	288.501	289.504	289.581	290.029	290.75	291.359	290.943	289.939	288.353	285.382	285.197	290.082	295.048	296.53	298.041	298.78	294.224	287.837	284.899	285.867	286.738	287.484	288.733	290.438	295.06	296.054	295.863	296.663	296.465	295.763	295.149	294.964	295.303	295.035	295.275	295.472	296.411	296.794	297.079
	13.5	283.282	284.777	286.167	286.726	286.752	286.746	285.87	286.563	286.646	288.375	288.869	289.536	290.413	291.057	291.874	291.012	288.828	288.017	286.069	285.126	290.111	295.412	296.047	295.441	296.616	292.554	289.775	289.106	289.429	290.696	295.408	295.722	296.393	296.528	296.804	296.765	296.977	297.163	296.549	295.627	295.73	296.679	295.923	295.706	295.54	296.158	296.487	296.571
	12.75	284.225	285.297	286.838	287.295	287.389	287.112	286.364	286.743	286.841	287.775	288.774	290.453	290.415	291.184	291.656	290.232	288.301	286.903	285.955	285.179	290.807	295.669	294.684	292.988	292.548	292.702	290.958	292.215	295.389	296.85	297.026	298.014	298.622	298.152	297.605	296.994	297.012	297.6	297.34	296.569	296.533	296.319	296.203	296.005	295.896	295.919	296.132	296.003
	12	287.719	287.127	288.057	288.64	288.447	288.682	288.373	288.262	288.009	289.063	290.487	291.427	290.517	290.888	289.684	287.661	285.892	284.365	283.925	283.847	288.356	293.126	293.198	291.986	291.615	295.084	296.511	293.504	297.434	297.964	297.426	297.258	297.674	295.923	294.933	295.667	295.699	296.444	296.892	297.621	298.393	298.736	298.495	297.98	297.633	296.863	296.936	296.846
	11.25	288.691	288.394	288.736	289.41	289.296	290.256	290.66	289.866	289.369	290.144	291.902	291.778	290.356	289.301	287.727	285.869	283.776	282.585	282.405	283.056	286.249	291.2	292.087	290.746	290.755	295.396	296.557	297.128	296.649	295.637	295.087	294.034	290.103	290.816	292.284	294.869	298.905	298.652	298.854	298.9	298.269	297.829	297.681	297.817	298.002	297.875	298.031	298.079
	10.5	288.035	288.265	288.736	289.271	289.773	290.723	291.337	291.145	290.904	291.286	292.373	292.355	290.411	287.574	287.266	286.964	284.696	283.637	283.29	282.996	285.886	290.84	291.921	290.656	290.011	290.991	292.327	291.939	291.704	290.656	289.803	289.067	289.858	291.276	292.582	296.96	297.919	298.439	298.55	298.706	298.445	298.27	298.171	298.374	298.444	298.793	298.902	298.971
	9.75	287.82	288.498	289.009	289.302	290.452	291.355	291.785	292.152	292.295	292.198	292.802	293.39	290.123	288.148	287.891	287.71	285.758	285.084	284.546	283.809	286.21	290.149	290.775	289.598	286.757	286.083	288.083	288.821	289.566	289.4	289.613	288.541	288.044	290.088	292.099	297.218	298.078	298.103	298.46	298.75	298.598	298.599	298.64	298.942	298.811	299.348	299.55	299.619
	9	289.428	289.979	290.733	291.354	291.466	292.355	293.191	293.012	292.788	292.949	293.639	294.116	292.063	290	287.463	285.909	285.402	284.913	284.043	284.457	287.519	288.399	288.253	289.118	287.988	287.47	288.105	288.378	288.62	288.958	290.172	289.793	290.636	291.766	293.141	297.656	298.435	299.097	298.668	298.222	297.677	297.7	297.802	298.312	298.761	299.443	299.282	299.204
	8.25	291.687	292.024	292.27	292.564	293.471	294.294	293.881	294.032	294.479	293.198	294.213	294.509	294.338	291.436	287.764	285.035	284.933	285.031	283.859	284.361	286.551	287.461	288.937	290.127	289.53	289.359	289.311	289.649	290.541	290.952	291.353	290.965	291.821	293.758	297.724	298.281	298.619	298.538	298.074	297.997	297.679	297.653	297.719	298.027	298.298	298.83	299.336	299.314
	7.5	292.238	292.856	293.131	293.654	294.358	294.784	294.48	294.323	295.062	294.197	293.815	293.758	294.572	292.991	288.717	285.551	284.592	285.834	285.217	284.239	285.089	288.025	291.958	292.192	291.303	290.177	290.25	290.019	290.591	290.853	291.426	291.525	292.372	294.477	297.405	298.063	297.867	297.913	297.643	297.786	297.602	297.775	298.061	298.705	299.189	299.615	299.943	299.817
	6.75	293.546	294.181	294.314	294.84	295.486	295.962	295.966	295.832	296.496	294.745	293.301	294.072	294.105	293.089	289.87	287.596	286.658	286.76	285.056	282.744	285.79	291.114	293.585	291.947	292.071	292.302	292.498	291.263	291.282	290.776	292.047	292.484	293.885	296.336	297.938	298.591	298.096	298.38	298.613	298.841	298.807	298.634	298.797	299.263	300.098	300.316	300.15	299.209
	6	293.334	294.132	294.492	295.262	295.481	296.644	296.084	296.012	295.701	295.357	294.837	294.876	294.78	293.147	290.372	290.134	288.268	287.556	285.893	285.31	288.19	292.393	293.34	292.593	293.204	293.899	293.237	290.782	291.98	292.654	293.467	294.409	295.925	297.232	298.916	299.772	298.327	298.23	298.091	298.689	298.714	299.011	299.051	299.343	299.734	300.062	301.417	299.972
	5.25	295.886	294.899	294.448	295.615	295.939	296.295	295.618	296.171	295.337	296.258	294.85	295.693	295.145	292.783	291.66	292.389	290.529	289.878	288.023	288.728	290.675	292.129	293.96	294.34	294.244	293.673	293.37	293.199	292.764	293.748	294.843	296.323	298.276	298.74	298.995	299.51	299.068	298.983	298.706	298.732	298.74	299.102	298.945	299.055	299.374	300.119	300.457	300.521
	4.5	293.037	293.727	293.789	294.766	295.645	296.38	295.981	295.028	294.35	294.678	293.471	292.116	292.858	295.206	294.89	296.17	295.654	294.003	291.357	291.144	291.816	292.749	293.795	294.801	295.208	293.995	293.743	294.186	294.392	294.981	295.67	297.948	298.963	299.304	299.602	299.915	299.934	299.77	299.377	299.403	299.468	299.724	299.442	299.558	300.311	300.748	299.941	299.417
	3.75	293.967	294.243	293.812	293.472	293.431	293.928	293.759	293.353	293.336	294.261	293.336	290.256	291.477	294.478	298.129	298.431	298.348	296.082	293.437	292.766	292.854	293.749	294.787	295.815	295.205	293.712	294.357	295.943	295.433	295.032	295.96	298.663	299.073	299.45	300.016	299.613	300.049	300.051	299.8	299.873	299.87	300.051	299.767	299.808	299.78	300.175	300.279	300.35
	3	294.636	294.337	294.316	294.34	293.948	293.701	292.904	291.663	291.48	292.947	292.659	291.781	292.074	293.665	295.491	297.646	296.984	295.645	295.398	295.834	295.664	295.699	296.194	296.685	296.438	295.181	295.155	295.824	295.172	296.604	297.305	298.414	298.995	299.302	299.435	299.22	299.612	299.649	299.421	299.421	299.375	299.54	299.257	299.195	299.509	299.767	299.459	299.252
	2.25	294.955	294.804	294.88	295.219	294.442	293.688	292.415	290.847	290.332	291.764	292.296	293.283	292.731	291.814	292.556	294.941	294.734	294.669	295.201	295.712	297.67	298.556	298.488	297.941	297.392	296.336	296.033	295.941	295.945	297.879	298.41	298.259	298.742	299.012	298.887	299.069	299.222	299.314	299.048	298.884	298.939	299.076	298.807	298.783	299.197	299.478	298.934	298.713
	1.5	295.114	294.683	294.788	294.324	293.605	293.096	292.229	290.808	290.294	291.062	291.882	291.92	291.755	289.831	289.891	291.063	290.439	291.448	294.153	296.312	298.394	299.479	299.177	298.294	297.827	297.175	297.012	297.111	297.591	297.92	298.186	298.337	298.306	298.536	298.817	298.934	298.884	298.907	298.934	298.867	298.934	299.096	298.944	298.858	299.121	299.27	298.736	298.63
	0.75	295.292	294.965	294.096	293.791	292.846	292.335	291.634	290.737	290.4	290.451	291.122	291.247	291.505	289.133	287.919	288.489	287.493	288.968	293.46	296.536	298.27	299.233	299.34	298.746	298.291	298.035	298.156	298.382	298.419	298.417	298.223	298.564	298.274	298.356	298.639	298.856	298.78	298.948	298.922	299.063	299.134	299.119	299.158	298.979	299.247	299.396	298.991	298.986
	0	294.939	294.301	293.948	292.522	291.58	290.807	289.818	289.517	288.802	288.726	291.444	292.653	292.191	288.55	287.334	287.092	286.919	288.962	293.675	296.749	298.188	298.268	298.153	298.528	298.449	298.602	298.599	298.329	298.704	298.378	298.206	298.225	297.934	298.331	298.311	298.473	298.667	298.658	298.733	298.799	298.92	298.881	298.454	298.448	298.789	299.009	298.656	298.616
	-0.75	294.973	294.47	293.525	292.542	291.238	289.901	288.689	289.212	289.195	289.32	291.443	292.483	292.711	288.996	287.588	287.783	288.255	290.064	293.795	297.022	297.262	297.57	297.332	298.311	298.933	299.066	298.901	298.397	298.75	298.464	298.484	298.31	297.914	298.308	298.126	298.304	298.284	298.403	298.347	298.416	298.476	298.677	298.068	297.91	298.06	298.572	298.784	298.875
	-1.5	294.208	293.992	293.316	292.518	291.59	290.353	289.145	289.806	289.864	289.824	291.84	292.737	290.905	288.765	288.09	289.538	290.066	291.243	293.996	296.539	296.4	296.747	297.728	298.929	299.249	298.833	298.961	299.009	299.147	298.842	298.779	298.681	298.571	298.589	298.168	298.462	298.459	298.512	298.276	298.18	298.433	298.738	297.941	297.685	297.84	298.529	298.672	298.834
	-2.25	293.345	293.203	292.865	292.194	291.661	290.775	289.629	290.436	290.652	290.539	291.921	292.191	290.496	288.616	288.401	291.244	291.787	292.015	293.305	295.539	296.476	297.483	297.461	297.505	298.893	299.403	299.325	299.145	299.288	298.775	298.713	298.691	298.819	298.902	298.38	298.622	298.597	298.605	298.336	298.229	298.472	298.728	297.893	297.63	297.732	298.539	298.758	298.79
	-3	294.611	294.612	294.029	293.08	291.574	290.152	290.087	290.916	290.242	289.759	290.565	291.019	290.602	289.351	289.973	291.177	292.205	291.851	293.689	295	296.203	297.425	297.476	297.679	298.823	299.179	299.334	299.178	299.46	298.95	298.716	298.516	298.863	299.136	298.581	298.876	298.793	298.813	298.524	298.509	298.69	298.883	297.965	297.609	297.64	298.387	298.651	298.503
	-3.75	293.929	293.373	293.091	292.546	291.52	290.497	290.343	291.112	290.741	291.217	291.127	291.661	292.236	291.736	290.713	292.174	293.748	292.297	292.548	294.224	296.166	298.255	298.216	297.567	298.16	298.526	298.933	299.204	299.523	298.964	298.578	298.399	298.847	299.43	299.325	299.663	299.621	299.609	299.121	298.957	298.987	299.203	298.619	298.361	298.187	299.03	298.695	298.522
	-4.5	293.224	293.136	293.492	293.435	292.638	292.031	291.947	290.306	289.844	290.597	290.862	291.247	291.763	291.583	291.953	292.589	293.504	292.681	293.569	295.402	296.835	297.979	298.101	297.72	298.067	298.383	298.842	298.976	299.244	298.635	298.207	298.019	298.524	299.533	299.063	299.486	299.707	299.742	299.611	299.175	299.102	299.307	299.032	298.837	298.62	299.215	298.378	298.036
	-5.25	292.73	292.776	293.588	293.905	292.939	292.224	293.289	291.419	289.666	289.414	290.071	291.097	291.23	291.466	292.632	292.709	292.65	292.881	294.422	297.049	298.263	297.498	297.83	297.819	298.057	298.222	298.67	298.903	299.075	298.538	298.159	298.099	298.537	299.187	299.078	299.576	299.715	299.633	299.384	299.102	298.938	298.944	299.126	299.004	298.757	299.217	298.299	297.996
	-6	292.447	292.877	293.026	293.704	293.071	292.494	292.608	291.328	290.314	290.481	290.451	291.047	290.908	291.689	292.629	292.877	292.27	293.185	294.737	297.091	298.556	297.536	297.425	297.345	297.811	298.119	298.662	298.759	299.323	299.097	298.925	298.968	299.167	299.346	299.599	299.925	299.825	299.633	299.103	298.621	298.372	298.325	298.467	298.393	298.223	298.92	298.991	298.798
	-6.75	292.738	293.114	292.677	293.141	293.589	292.573	290.846	292.049	291.445	291.205	291.091	291.158	290.646	291.838	292.171	292.669	292.448	293.98	294.836	296.993	298.605	297.808	297.37	297.396	298.122	298.585	298.627	298.814	299.566	299.785	299.736	300.026	299.725	299.61	299.982	299.996	299.761	299.443	298.85	298.405	298.304	298.356	298.233	298.17	298.251	298.872	299.675	299.557
	-7.5	292.631	293.008	293.064	293.153	292.928	292.317	291.374	291.844	292.41	291.37	292.002	291.342	290.131	290.885	290.481	291.82	293.788	295.186	295.159	297.036	298.685	298.292	298.739	298.44	298.6	298.505	298.411	298.681	299.474	299.698	299.606	299.654	299.311	298.841	298.756	298.982	298.612	298.352	298.15	297.992	298.057	298.452	298.712	298.918	298.899	299.576	300.042	300.57
	-8.25	292.572	292.629	292.965	292.676	292.144	292.069	290.954	291.39	292.459	290.932	292.247	291.07	289.702	290.084	289.279	291.256	294.497	295.632	294.9	296.735	298.509	298.813	299.208	299.344	298.658	297.962	297.843	298.404	298.951	299.453	299.316	299.223	298.885	298.583	298.429	298.805	298.486	298.38	298.549	298.587	298.623	298.933	299.217	299.359	299.11	299.309	299.291	299.781
	-9	292.114	292.404	292.015	291.717	290.776	291.479	291.222	291.533	290.67	290.128	290.738	290.025	289.649	289.89	290.364	292.575	294.245	294.748	294.977	296.595	298.399	299.34	299.425	298.973	298.417	297.449	297.544	297.84	298.396	298.651	298.392	298.49	298.577	298.506	298.73	299.269	299.426	299.295	298.589	297.766	297.511	297.936	298.711	299.499	299.681	299.896	300.071	300.079
	-9.75	292.1	291.963	291.117	290.884	290.757	291.136	290.627	290.387	289.727	289.445	289.748	289.386	289.651	290.456	291.781	293.698	293.872	294.083	295.179	296.674	297.693	299.619	299.527	298.688	297.999	297.506	297.349	297.559	297.802	298.056	297.743	297.985	298.438	298.527	299.036	299.333	299.57	299.631	299.321	298.723	298.192	298.137	298.421	298.636	298.418	298.613	299.41	299.955
	-10.5	291.742	291.212	290.78	290.793	290.517	290.275	289.763	289.939	289.42	288.631	288.666	289.295	289.95	292.256	292.439	292.94	293.866	295.182	295.997	296.543	297.037	299.116	299.32	298.436	297.721	297.247	297.201	297.3	297.713	298.055	297.687	297.853	298.638	298.876	299.342	298.965	299.154	299.387	299.098	299.041	298.959	299.319	299.121	298.556	298.384	298.764	299.389	299.767
	-11.25	291.394	290.999	290.963	291.093	290.249	289.765	290.182	290.771	289.648	287.968	288.337	289.646	290.065	293.854	293.125	293.28	293.803	295.109	295.901	296.193	296.442	299.282	299.273	298.438	297.893	297.428	297.199	297.033	297.713	298.036	297.807	297.951	298.348	298.44	299.028	298.7	298.684	298.955	298.811	299.48	299.598	299.981	299.401	298.927	299.686	299.289	299.566	299.644
	-12	292.7	291.902	291.647	291.833	291.313	291.231	291.006	290.845	289.727	289.083	290.082	290.428	291.045	294.979	293.798	292.684	293.752	294.915	295.498	295.463	295.177	298.874	299.582	299.199	298.8	298.528	298.061	297.778	297.763	298.5	298.262	298.035	297.476	297.6	298.398	299.13	299.188	299.167	298.947	299.026	299.268	299.446	299.025	299.417	300.578	299.898	300.307	300.071
	-12.75	292.611	292.335	291.873	291.937	291.768	292.147	291.606	291.066	290.538	291.001	292.45	290.977	291.372	295.076	293.875	292.262	293.2	294.326	294.798	294.949	294.633	298.254	299.364	299.773	300.064	299.563	298.795	298.216	298.67	298.647	298.437	297.829	296.037	295.453	297.643	299.205	299.429	299.247	298.89	298.572	298.633	298.568	298.39	299.626	300.196	300.178	300.428	300.203
	-13.5	292.536	292.454	292.06	292.072	292.123	292.655	292.531	292.623	292.105	292.071	292.399	291.235	291.229	294.907	293.379	292.972	293.457	294.258	294.853	295.186	294.808	297.556	298.888	299.825	300.257	299.968	298.9	298.801	299.283	299.548	298.683	297.259	293.649	294.153	296.862	298.27	299.414	299.598	299.466	299.194	298.736	298.732	299.092	299.611	299.785	299.144	299.826	300.199
	-14.25	293.219	292.599	292.181	292.141	292.28	292.817	293.108	293.764	293.434	292.918	292.461	292.78	292.512	293.594	293.725	292.915	293.557	294.394	294.822	295.689	295.236	297.317	298.536	301.703	301.192	301.022	298.948	298.81	299.262	300.485	299.56	297.064	293.166	291.925	296.114	297.612	298.643	299.638	299.94	300.012	299.533	299.385	299.697	299.609	299.066	298.942	299.362	299.98
	-15	291.83	293.657	293.063	292.941	292.995	293.408	293.726	294.21	294.133	294.143	294.21	294.311	294.07	293.849	293.79	293.458	294.006	294.838	294.854	296.017	296.176	298.046	299.648	301.221	300.817	300.732	298.66	298.585	298.852	299.907	299.458	297.081	293.355	292.936	294.235	297.94	297.727	297.858	298.435	298.803	299.033	299.209	298.797	298.825	299.636	300.434	300.911	301.415
	-15.75	293.528	293.588	292.824	292.888	292.979	293.375	293.508	293.937	294.433	294.09	294.612	295.126	294.783	293.905	293.852	293.336	293.883	294.814	294.841	296.286	296.827	298.895	299.291	299.401	299.529	299.087	298.027	297.535	296.625	296.887	298.432	297.274	293.231	292.161	295.838	297.423	298.808	298.469	298.562	299.236	299.745	299.948	298.903	298.701	299.621	300.397	300.136	300.013
	-16.5	292.643	292.851	293.019	293.006	293.565	294.292	294.039	294.142	293.709	293.668	294.278	294.696	294.818	294.816	294.897	293.641	294.075	295.062	296.019	297.136	298.897	298.97	299.534	299.22	298.592	298.013	297.594	296.076	294.961	295.245	295.634	294.097	292.169	293.411	297.614	297.907	299.569	299.809	299.61	299.44	299.295	299.348	298.845	299.277	299.493	299.414	299.273	299.148
	-17.25	292.124	292.47	292.277	293.228	293.668	294.22	293.773	293.688	292.38	292.32	292.91	293.805	294.588	295.824	295.868	294.641	295.069	296.096	297.536	298.668	299.53	299.774	299.721	298.73	298.12	297.317	296.161	295.336	294.485	293.352	292.716	291.259	291.835	295.387	297.454	298.465	299.376	299.415	298.781	298.556	297.665	297.377	298.036	299.557	299.916	299.744	300.299	300.576
	-18	291.662	292.284	291.927	291.922	292.587	293.435	293.001	292.533	290.975	291.1	291.62	293.228	295.08	296.391	296.528	296.549	296.934	298.075	298.652	300.013	300.239	299.958	299.218	298.113	296.99	296.26	295.301	294.077	293.841	292.446	290.553	289.394	290.727	296.187	298.03	298.449	298.619	299.184	298.844	299.01	298.474	298.378	298.754	299.709	299.896	299.696	300.04	300.075
	-18.75	292.934	291.845	290.712	289.417	290.904	291.322	290.939	291.14	286.654	289.03	289.716	292.261	294.761	296.926	298.129	298.935	298.735	299.57	298.437	299.361	297.966	299.76	298.474	296.686	295.718	294.72	294.146	293.357	293.771	291.506	288.81	288.265	291.175	297.001	298.253	298.378	297.772	298.391	295.796	299.395	299.195	299.316	299.94	299.914	301.686	299.897	300.566	300.507
	-19.5	291.447	291.224	289.677	288.511	289.587	290.798	289.664	289.909	287.112	289.847	290.447	293.263	296.097	296.907	298.115	299.001	299.356	299.771	298.758	299.131	290.172	299.318	298.811	297.863	296.433	295.459	294.119	287.418	294.095	291.357	288.742	290.099	291.529	297.795	298.017	299.129	297.499	298.807	295.585	298.597	299.017	299.379	299.78	299.628	300.335	299.459	300.815	300.498
	-20.25	293.757	293.776	293.348	292.795	291.645	291.353	291.305	291.659	289.821	290.447	290.788	293.351	295.538	296.001	297.538	298.284	298.697	298.701	298.756	298.818	299.839	299.906	300.167	299.435	298.429	296.25	294.865	287.771	294.159	290.57	288.719	290.815	295.775	297.276	297.343	298.746	297.412	297.679	295.509	298.611	298.36	298.665	298.598	298.616	298.686	299.059	299.149	298.969
	-21	292.021	292.711	292.752	292.958	292.543	292.478	292.56	293.355	292.037	292.706	292.925	293.713	295.07	295.734	296.808	298.213	298.858	299.269	299.577	299.849	300.199	300.442	300.376	299.505	299.075	298.165	295.489	294.805	293.289	290.259	289.674	292.688	296.697	297.605	297.525	298.709	297.931	298.104	297.538	298.218	298.156	298.119	297.709	297.573	298.263	298.696	298.561	298.488
	-21.75	291.553	291.662	291.985	292.516	292.787	293.052	293.549	293.854	293.232	292.561	292.891	293.164	294.262	294.99	296.105	298.289	298.426	299.182	299.097	299.635	299.696	299.675	299.232	298.704	298.287	297.643	296.462	294.163	292.181	290.393	290.767	294.139	297.58	297.531	297.792	298.56	298.567	298.32	297.939	297.818	297.733	297.632	297.258	297.218	297.976	298.216	298.066	298.018
	-22.5	290.467	291.481	291.334	292.085	292.857	293.389	293.684	294.155	293.447	292.619	293.06	293.266	293.791	294.55	295.216	298.126	298.234	298.368	298.198	298.509	299.075	298.661	298.222	297.935	297.755	297.415	295.571	293.156	291.25	290.756	292.637	296.392	297.837	298.186	298.024	298.12	298.595	298.473	297.94	297.368	296.866	296.546	296.397	296.57	296.982	297.768	297.269	297.288
	-23.25	289.846	291.022	290.974	291.949	292.973	293.53	293.549	293.699	293.417	293.034	293.404	293.772	293.914	294.47	295.607	298.118	298.093	297.95	297.592	297.784	298.477	298.019	297.628	297.508	297.287	297.177	296.084	294.147	291.537	291.166	294.132	297.31	298.464	297.763	297.719	297.582	298.236	298.314	297.993	297.366	296.618	296.118	295.681	295.949	296.821	296.884	296.707	296.695
	-24	290.791	291.04	292.119	293.178	293.599	293.74	293.499	293.098	292.426	293.195	293.855	295.147	295.108	295.725	296.865	298.789	298.047	297.798	297.49	297.602	298.267	297.997	297.628	297.607	297.333	297.532	296.881	295.077	292.68	292.666	294.623	297.304	297.021	296.519	297.251	297.606	297.97	297.829	297.699	297.536	297.088	296.673	296.38	296.25	296.997	296.854	296.556	296.436
	-24.75	290.524	290.653	292.292	293.111	293.325	292.827	292.212	291.008	290.881	293.108	294.468	296.054	296.304	296.377	299.178	298.343	298.161	297.951	297.145	297.127	297.825	297.692	297.409	297.453	297.188	297.513	297.341	296.267	294.419	294.111	295.495	296.26	296.336	296.281	296.317	296.499	297.563	297.941	297.896	297.552	297.172	296.903	296.579	296.52	296.475	296.852	295.907	295.765
	-25.5	291.482	291.497	291.212	292.106	292.373	291.912	290.29	288.863	289.794	292.624	294.959	296.786	297.439	297.956	299.374	299.018	298.01	297.392	296.511	296.598	296.632	296.806	296.549	296.67	296.448	296.876	296.831	296.669	295.747	295.784	296.426	296.36	295.637	295.795	295.938	296.476	296.995	297.136	297.207	297.118	297.146	296.909	296.491	296.223	296.142	296.755	295.927	295.962
	-26.25	292.987	292.343	291.448	290.872	291.074	290.695	289.04	286.829	288.71	291.791	294.582	297.24	297.821	298.707	299	299.09	298.181	297.041	296.05	295.766	295.657	296.088	295.852	295.929	295.586	295.811	296.187	296.729	296.464	296.642	296.975	296.446	295.737	296.137	296.986	296.812	297.407	296.98	296.973	296.771	296.008	296.465	295.989	295.822	295.693	295.759	295.829	295.622
	-27	293.839	292.794	291.883	291.188	290.765	289.651	288.242	287.521	288.655	290.278	293.276	296	297.746	298.096	298.28	297.627	296.813	296.498	295.723	295.52	295.454	295.804	295.685	295.406	295.123	295.314	295.463	296.359	296.594	296.813	296.6	295.568	294.846	295.611	296.139	296.283	296.624	296.782	295.799	296.038	295.781	295.656	296.239	295.893	295.496	294.813	295.474	295.193
	-27.75	295.269	293.676	292.811	291.953	290.008	287.976	287.295	288.897	287.75	289.74	291.464	294.918	296.478	297.234	297.499	296.841	296.355	296.085	295.565	295.191	295.469	295.387	295.319	295.551	295.133	295.091	295.201	295.588	295.806	295.993	295.672	295.321	294.683	295.127	295.599	295.484	295.952	296.092	295.866	295.583	295.101	294.938	294.922	294.737	294.8	294.476	294.886	295.05
	-28.5	296.686	295.385	293.982	291.898	289.363	285.832	287.657	289.315	289.025	291.184	294.034	295.483	296.334	296.264	296.006	295.454	294.753	294.663	295.378	295.741	296.636	296.995	296.585	296.052	295.077	294.355	294.121	294.927	295.256	294.885	295.306	295.546	295.259	295.448	295.715	295.373	295.791	296.123	295.744	295.556	295.405	295.21	294.368	293.981	294.537	294.949	294.877	294.987
	-29.25	297.136	295.978	293.918	291.07	287.902	284.86	286.732	290.529	291.103	293.482	294.309	295.541	296.299	296.376	296.1	295.998	295.768	295.546	294.914	295.289	295.812	295.388	295.639	296.045	295.581	295.097	294.691	295.012	295.148	294.588	294.936	295.336	295.129	294.919	295.412	295.068	295.568	295.786	295.618	295.305	294.956	294.751	294.667	294.684	294.595	294.348	294.528	294.941
	-30	296.259	294.299	292.418	290.316	287.086	286.301	288.498	291.653	293.705	294.957	295.309	295.564	296.533	296.687	296.036	295.675	295.566	295.499	295.268	295.494	295.744	296.15	295.879	295.569	295.02	294.298	294.115	294.388	294.774	294.454	294.604	294.749	294.781	294.508	294.929	294.586	295.241	295.323	295.09	294.715	294.504	294.587	294.217	294.151	293.936	294.065	293.687	293.944
	-30.75	292.842	291.813	290.444	289.234	287.679	288.515	291.149	293.116	295.825	295.758	295.956	295.599	296.595	297.057	296.487	295.936	295.621	295.792	295.521	295.608	295.7	295.823	295.254	294.944	294.254	293.388	293.247	293.618	294.17	294.062	294.31	293.96	293.872	293.919	293.982	293.715	294.002	294.254	294.123	293.934	293.839	293.852	293.122	293.364	293.387	293.369	293.124	293.141
	-31.5	289.012	289.39	288.755	288.942	289.7	291.657	293.562	295.608	296.742	296.138	295.665	295.991	296.214	296.514	296.341	296.159	296.342	296.515	295.955	295.714	295.61	295.28	294.662	294.328	293.483	292.802	292.513	293.016	294.071	293.691	293.53	293.628	293.17	292.946	293.314	293.289	293.512	293.522	293.275	293.128	293.059	293.212	292.614	292.629	292.75	293	292.621	292.393
	-32.25	287.141	288.492	288.785	290.002	292.522	293.883	296.44	296.771	296.785	296.19	296.164	295.952	296.036	296.341	296.502	296.553	297.02	297.097	296.379	295.511	295.284	294.541	293.993	293.843	293.195	292.751	292.336	293.127	293.3	293.552	293.47	292.88	292.521	292.484	292.812	292.842	293.075	292.822	292.712	292.695	292.66	292.853	292.501	292.36	292.33	292.474	291.98	291.986
	-33	288.975	290.338	290.211	291.704	293.712	297.728	297.475	296.744	296.789	296.382	296.034	295.953	295.984	295.928	295.799	295.489	295.709	295.919	296.025	296.052	296.085	295.897	294.625	293.762	292.425	291.539	291.113	292.055	292.65	293.003	292.933	292.566	292.286	292.32	292.507	292.63	292.463	292.248	292.09	292.424	292.533	292.804	292.423	292.395	292.477	292.404	292.195	292.192
	-33.75	290.951	291.989	292.847	294.568	295.767	296.594	296.055	295.928	296.185	296.031	295.527	295.128	295.187	295.474	295.267	295.348	295.542	295.663	295.219	294.779	294.357	293.576	292.956	292.905	292.686	291.829	291.456	291.978	291.692	291.89	291.849	291.794	291.201	291.229	291.191	291.648	291.644	291.605	291.95	292.344	292.432	292.727	292.455	292.32	292.369	292.502	292.005	292.165
	-34.5	294.013	294.478	295.393	295.504	296.074	296.376	296.006	295.809	295.385	295.261	295.007	294.759	294.798	294.654	294.816	294.697	294.522	294.231	294.039	293.994	293.946	293.493	292.775	292.378	291.668	291.341	290.418	290.83	291.007	291.031	291.213	291.097	290.874	291.176	291.27	291.433	291.632	291.43	291.709	291.776	292.01	292.252	292.048	291.955	291.958	291.851	291.728	291.929
	-35.25	296.008	296.373	296.315	296.573	295.839	295.453	295.689	295.927	295.008	294.808	294.719	294.737	294.423	294.243	294.301	294.271	293.902	293.442	293.476	293.646	293.699	293.417	292.635	292.178	291.269	290.546	290.228	290.68	290.543	290.366	290.67	290.785	290.955	291.182	291.13	291.478	291.407	291.077	291.309	291.586	291.919	292.3	292.051	291.933	291.715	291.745	291.604	291.795
	-36	293.597	293.902	294.324	294.915	295.006	294.793	295.002	295.109	294.471	294.344	294.203	293.994	293.844	293.513	293.608	293.43	293.028	292.569	293.286	293.32	293.232	292.826	292.15	291.35	290.753	290.345	289.777	290.01	290.144	290.189	290.274	290.259	290.433	290.633	290.659	290.813	290.865	290.776	290.864	291.15	291.378	291.692	291.491	291.318	291.17	291.023	290.941	290.927
	-36.75	293.231	293.166	293.753	294.611	294.926	295.08	294.599	294.458	293.94	293.712	293.395	293.103	292.911	292.908	293.23	293.229	292.854	292.685	292.45	292.506	292.411	292.027	291.488	291.326	290.594	290.324	290.342	290.569	290.625	290.373	290.396	290.359	290.989	290.801	290.866	290.986	290.903	290.327	290.645	291.096	291.328	291.787	291.711	291.435	291.418	291.158	290.92	290.69
	-37.5	290.685	291.049	291.498	292.656	293.589	294.114	293.799	293.58	293.285	293.35	292.918	292.338	292.512	292.916	292.996	292.901	293.158	292.207	291.795	292.107	291.945	291.602	291.025	290.814	290.447	290.392	290.554	290.971	290.888	290.121	290.166	290.035	291.258	290.58	291.169	290.657	290.645	290.738	290.997	291.016	291.076	291.627	291.41	291.536	291.543	291.247	290.611	290.237
	-38.25	290.564	290.029	289.931	290.964	291.9	292.641	292.432	292.268	292.436	292.526	292.239	291.818	291.898	291.965	292.29	292.156	291.815	291.531	291.173	291.206	291.225	290.941	290.691	290.554	290.327	289.823	290.156	290.293	290.565	289.974	290.091	290.246	291.088	290.522	290.904	291.076	290.836	290.905	289.882	290.329	290.234	290.725	290.959	290.703	290.916	290.808	290.153	289.603
	-39	290.342	290.145	290.178	290.762	291.409	291.865	291.547	291.265	291.543	291.361	291.077	290.803	290.78	290.904	291.107	291.264	291.149	290.845	291.09	290.879	291.082	290.749	290.297	289.944	289.749	289.236	289.384	289.768	289.741	289.78	290.134	290.646	290.846	290.809	290.701	290.56	289.938	289.789	289.963	290.55	290.939	291.276	291.107	290.378	289.889	289.499	289.316	289.189
	-39.75	291.074	290.832	290.59	290.516	290.683	290.794	290.394	290.038	290.614	290.305	290.1	289.895	289.869	290.068	290.229	290.542	290.621	290.45	290.154	289.796	290.145	289.92	289.399	289.245	288.991	288.512	288.857	289.303	289.336	289.471	290.095	290.816	290.622	290.981	290.561	290.501	289.318	289.313	289.382	289.899	290.333	290.692	290.924	290.499	290.075	289.744	289.65	289.428
	-40.5	290.747	290.608	290.16	289.579	289.47	289.17	288.535	288.023	288.291	288.396	288.53	288.749	289.142	289.559	289.793	289.795	289.494	288.911	288.467	288.242	289.074	288.668	288.356	288.209	288.146	287.656	288.213	288.67	288.585	288.868	289.278	289.792	289.931	289.993	290.171	290.192	289.703	288.956	289.229	289.894	289.878	290.32	290.471	290.398	289.804	289.256	289.017	288.84
	-41.25	289.952	289.886	289.266	288.307	288.099	287.729	287.219	286.985	287.2	287.293	286.984	286.715	286.783	287.164	287.478	287.833	287.849	287.644	287.145	286.714	287.054	286.415	286.406	286.361	286.584	286.322	287.043	287.443	287.51	287.548	287.87	288.202	288.694	288.383	288.754	289.402	289.283	288.581	289.165	289.323	289.127	289.362	289.695	289.51	289.194	288.729	288.102	287.808
	-42	288.566	288.58	288.326	287.561	287.022	286.378	285.839	285.616	285.714	285.926	285.649	285.379	285.339	285.467	285.226	284.797	284.183	283.846	284.452	285.085	285.089	284.897	284.576	284.178	284.08	283.589	284.346	284.775	285.069	285.423	285.876	286.295	286.882	287.058	287.171	287.272	287.623	287.763	287.442	287.869	288.103	288.231	288.074	288.007	288.218	288.225	287.506	286.982
	-42.75	287.745	287.825	287.407	286.607	286.299	285.934	285.449	285.088	285.126	284.998	284.687	284.263	283.957	283.926	283.665	283.162	282.323	281.753	282.221	282.519	281.614	281.025	281.484	282.227	282.824	282.801	283.335	283.452	283.44	283.454	283.886	284.42	284.993	285.455	285.493	285.427	285.857	286.412	286.123	286.753	287.314	287.378	287.053	287.251	287.667	287.871	287.16	286.569
	-43.5	286.763	286.908	286.697	286.132	285.744	285.324	285.155	284.872	284.751	284.378	283.775	283.353	283.169	282.589	281.04	280.149	279.961	280.083	280.353	280.225	280.049	279.671	280.052	280.578	280.927	281.345	281.57	281.132	281.252	281.375	281.92	282.565	283.358	284.274	284.321	284.013	284.532	285.051	285.334	285.861	286.189	285.992	286.468	287.392	287.449	287.053	286.641	286.199
	-44.25	285.911	286.076	286.123	285.77	285.24	284.852	284.648	284.565	284.279	283.791	283.103	282.746	282.01	281.414	280.654	279.695	278.851	278.392	278.9	279.381	278.989	279.102	279.267	279.687	280.133	279.995	280.055	280.061	280.154	280.278	280.755	281.393	282.379	283.062	283.085	283.228	283.808	284.53	284.878	284.843	284.926	285.146	285.935	286.949	286.606	286.091	285.814	285.707
	-45	285.146	285.186	285.083	284.767	284.05	283.688	283.623	283.859	283.727	283.517	283.01	282.304	281.779	281.365	280.614	279.715	279.034	278.565	278.782	279.046	278.442	278.276	278.441	278.737	279.095	279.12	279.314	280.021	280.483	280.652	280.487	280.809	281.151	282.048	282.531	282.836	283.571	284.107	284.544	284.827	285.116	285.273	285.385	285.937	286.175	286.45	285.86	285.941
	-45.75	283.829	283.873	283.977	283.779	283.077	282.796	282.889	282.959	282.803	282.609	282.278	281.717	281.401	281.169	280.501	280.21	278.892	279.472	278.832	279.228	278.564	278.526	278.098	278.324	278.611	279.133	279.28	279.834	280.491	280.382	280.245	280.351	280.443	281.021	281.637	282.23	282.851	283.475	284.165	284.658	285.2	285.4	284.984	284.944	285.619	286.251	285.663	285.453
	-46.5	283.443	283.277	283.462	283.426	282.533	282.178	282.596	282.994	282.644	282.101	282.049	281.698	281.135	280.936	280.692	280.444	280.312	279.713	279.465	279.27	279.574	279.436	279	278.64	278.709	278.523	278.354	278.512	279.073	279.347	279.786	280.052	280.451	281.324	282.284	283.106	283.197	283.322	283.767	283.992	283.854	283.952	283.943	284.011	284.198	284.312	284.231	284.093
	-47.25	282.782	282.612	282.8	282.87	282.145	281.896	282.37	282.697	282.259	281.992	281.763	281.446	280.877	280.829	280.887	281.021	280.52	280.276	279.861	279.75	279.8	280.104	279.506	278.849	278.91	278.607	278.086	277.978	278.189	278.71	279.255	279.684	280.066	280.704	282.216	283.385	283.115	282.565	282.966	283.346	282.827	282.936	283.271	283.472	283.251	283.077	283.209	283.374
	-48	282.053	281.998	282.009	281.864	281.583	281.582	281.573	281.666	281.443	281.27	281.181	280.82	280.354	280.251	279.962	279.899	279.358	279.578	279.514	279.377	279.524	279.263	278.722	278.374	278.385	278.189	277.667	277.567	277.952	278.346	278.628	278.967	279.514	280.299	280.767	281.676	281.964	282.029	282.244	282.483	281.976	282.025	282.191	282.324	282.179	282.238	282.417	282.635
	-48.75	281.381	281.441	281.471	281.077	281.078	281.23	281.018	280.86	280.777	280.714	280.678	280.286	279.803	279.767	279.53	279.332	278.822	278.741	279.183	279.668	278.96	278.721	278.289	277.948	278.001	277.75	277.31	277.292	277.527	277.937	278.01	278.167	278.582	279.076	279.36	279.942	280.605	280.927	281.035	280.963	280.647	280.637	280.702	280.829	280.838	280.928	281.101	281.307
	-49.5	280.613	281.032	280.605	280.982	280.512	280.426	280.425	280.666	280.431	280.338	280.116	279.905	279.44	279.396	279.215	279.132	278.796	278.62	278.51	278.742	278.871	278.578	278.312	278.087	278.065	277.928	277.233	277.162	277.458	277.714	277.781	277.699	277.736	278.074	278.633	279.047	279.218	279.379	279.666	279.509	279.289	279.215	279.35	279.297	279.355	279.501	279.978	279.994
	-50.25	279.457	279.771	280.266	279.962	279.612	279.624	279.852	280.276	280.059	279.648	279.609	279.441	279.121	279.056	278.808	278.664	278.482	278.364	278.175	278.13	278.335	278.514	278.216	277.86	277.788	277.625	277.343	277.365	277.581	277.597	277.395	277.18	276.998	277.571	278.217	278.816	278.63	278.352	278.422	278.526	278.418	278.352	278.337	278.5	278.629	278.889	279.271	279.492
	-51	278.029	278.462	278.752	278.708	278.563	278.753	279.287	279.598	279.703	279.415	279.216	278.899	278.65	278.458	278.015	277.82	277.281	277.241	276.931	277.245	277.236	277.128	276.916	276.687	276.74	276.74	276.496	276.545	276.626	276.403	276.244	276.17	275.937	276.385	277.214	278.008	278.203	278.334	278.557	279.163	279.108	279.067	278.564	278.471	278.177	278.26	278.049	278.054
	-51.75	276.76	277.126	277.267	277.708	278.061	278.528	278.758	279.013	279.063	279.306	279.052	278.709	278.604	277.969	277.009	276.529	276.507	276.443	276.524	276.259	276.325	276.433	276.495	276.331	276.006	275.709	275.601	275.693	275.846	275.849	275.929	276.032	276.186	276.549	276.674	277.565	277.592	277.802	278.17	278.215	278.297	278.327	278.099	278.394	278.32	278.335	278.475	278.639
	-52.5	275.039	275.319	275.666	276.239	276.929	277.63	277.926	277.908	278.244	278.206	279.035	278.763	278.412	277.454	277.257	276.961	276.789	277.293	276.86	277.123	276.558	276.667	277.161	277.023	276.832	276.987	276.151	275.962	275.881	275.988	275.785	275.67	275.599	275.563	275.376	276.176	275.729	276.121	275.75	275.554	275.267	275.336	275.322	275.898	276.783	276.924	276.546	275.5
	-53.25	273.927	274.176	274.4	274.831	275.507	276.346	276.708	277.046	277.51	277.505	277.705	277.445	277.272	277.016	276.711	276.606	276.283	276.096	276.184	275.873	275.91	276.196	276.173	276.217	276.448	276.27	276.192	275.774	275.843	275.932	276.095	276.017	276.231	276.46	276.795	277.298	277.59	277.715	277.898	278.011	277.993	277.954	277.543	277.102	276.959	276.772	276.41	276.301
	-54	273.242	273.464	273.639	274.016	274.577	275.355	275.665	276.05	276.327	276.914	276.826	276.588	276.418	276.227	276.011	275.59	275.229	275.067	275.479	276.039	275.941	276.407	276.177	275.842	275.643	275.221	275.436	275.577	275.734	275.639	275.434	275.264	275.704	275.861	276.023	276.368	276.629	276.819	276.691	276.427	276.53	276.439	276.367	276.148	276.246	276.208	275.905	275.607
	-54.75	272.964	273.003	273.216	273.514	273.822	274.447	274.81	275.256	275.285	275.839	275.892	275.707	275.506	275.476	275.201	274.678	274.473	274.373	274.69	275.4	276.188	276.074	275.74	275.291	274.834	274.486	274.442	274.851	275.067	275.052	274.81	274.58	274.649	274.974	275.431	275.612	276.016	276.098	275.729	275.459	275.829	275.786	275.49	275.404	275.476	275.683	275.383	275.188
	-55.5	272.176	273.405	273.216	273.223	273.451	273.92	274.22	274.609	274.843	275.283	275.296	275.182	274.88	275.02	274.911	274.621	274.601	274.424	274.469	274.853	275.036	275.14	275.31	275.023	274.594	274.375	274.549	274.861	274.99	274.771	274.607	274.366	274.473	274.596	275.165	275.337	275.564	275.69	276.091	276.23	276.054	275.75	275.318	275.114	275.089	275.126	275.001	275.024
	-56.25	272.2	272.27	272.393	272.616	272.692	272.937	273.211	273.512	274.071	274.089	274.175	274.095	273.858	274.346	274.122	273.927	274.296	273.94	274.247	274.164	274.627	274.462	274.412	274.241	274.196	274.109	274.715	274.865	274.931	274.209	274.131	273.844	274.275	274.189	274.846	275.056	275.473	275.716	275.461	275.22	275.218	275.604	274.997	274.508	274.345	274.385	274.601	274.709
	-57	273.102	272.852	272.952	272.89	272.575	272.644	272.807	273.178	273.501	273.585	273.768	273.738	273.557	273.735	273.562	273.756	273.697	273.57	273.598	274.119	274.292	274.596	274.494	274.222	273.962	273.744	274.013	274.216	274.495	274.29	274.07	273.844	273.709	273.855	274.754	274.873	275.223	275.268	274.827	274.677	274.603	274.706	274.503	274.582	274.878	275.095	275.106	274.844
	-57.75	272.231	272.595	272.324	272.42	272.288	272.493	272.488	272.813	272.966	273.289	273.408	273.328	273.398	273.463	273.381	273.242	273.412	273.383	273.425	274.044	274.571	274.839	274.646	274.177	273.737	273.373	273.667	273.98	274.379	274.288	274.093	273.884	273.792	273.746	274.442	274.777	275.079	274.996	274.735	274.31	273.904	274.04	274.317	274.776	275.118	275.406	275.503	275.204
	-58.5	272.58	272.416	272.898	272.898	272.205	271.81	271.838	272.319	272.551	272.831	273.111	273.028	273.165	273.248	273.243	273.348	273.304	273.376	273.563	274.106	274.567	274.872	274.59	273.996	273.462	273.075	273.381	273.724	274.133	274.098	273.938	273.769	273.736	273.825	274.114	274.702	274.778	274.912	274.646	274.192	274.006	274.126	274.268	274.496	274.714	274.968	275.273	275.25
	-59.25	272.967	272.51	272.653	272.365	272.002	271.822	271.763	271.944	272.2	272.559	272.687	272.705	272.947	272.981	273.103	273.136	273.157	273.143	273.365	273.845	274.597	274.676	274.469	273.836	273.274	272.865	273.214	273.639	274.056	273.993	273.841	273.625	273.612	273.668	273.993	274.451	274.641	274.729	274.346	274.267	274.191	274.323	274.171	274.159	274.174	274.418	274.743	275.056
	-60	272.775	272.623	272.114	272.058	271.943	272.057	272.267	272.51	272.621	272.592	272.685	272.654	272.796	272.622	272.665	272.65	272.672	272.584	272.752	273.407	274.244	274.352	274.297	273.997	273.671	273.166	273.505	273.81	274.254	273.986	273.955	273.619	273.572	273.704	274.002	274.266	274.492	274.357	274.224	274.009	274.139	274.259	274.066	273.781	273.745	273.945	274.276	274.452
	-60.75	272.56	272.151	272.276	272.759	272.152	271.716	271.838	272.348	272.803	273.156	273.046	272.694	272.57	272.497	272.131	272.499	272.436	272.367	272.403	273.079	273.609	274.019	274.085	274.001	273.866	273.532	273.783	274.042	274.309	274.09	273.841	273.611	273.421	273.561	273.786	274.105	274.285	274.064	273.881	273.985	274.021	274.213	273.817	273.386	273.365	273.436	273.531	273.465
	-61.5	271.87	272.557	272.23	272.124	271.896	271.69	271.672	271.896	272.143	272.604	272.605	272.493	272.568	272.435	273.23	272.859	273.216	273.289	272.962	273.328	273.563	273.857	273.793	273.685	273.61	273.229	273.367	273.516	273.699	273.655	273.454	273.256	273.392	273.481	273.83	273.861	274.086	273.878	273.823	273.878	274.093	274.264	273.836	273.296	273.104	273.071	272.904	272.755
	-62.25	272.61	272.083	272.165	271.743	271.518	271.599	271.576	271.799	271.864	272.18	272.497	272.519	272.657	273.029	273.024	273.636	273.673	273.646	273.371	273.406	273.429	273.732	273.542	273.396	273.305	272.928	272.906	273.033	273.366	273.3	273.224	273.136	273.194	273.385	273.505	273.68	273.988	273.778	273.634	273.795	273.765	273.943	273.905	273.813	273.382	273.312	273.036	272.805
	-63	271.87	271.845	271.875	271.625	271.587	271.686	271.681	272.077	272.644	272.57	272.661	272.984	272.901	272.901	273.089	273.051	272.971	272.826	272.784	272.941	272.977	273.166	273.525	273.472	272.888	272.618	272.834	273.056	273.36	273.279	273.224	273.105	273.404	273.48	273.517	273.515	273.667	273.661	273.706	273.932	274.496	274.787	273.867	273.012	272.896	272.959	272.976	273.047
	-63.75	271.114	271.447	271.378	271.595	271.726	271.938	272.049	272.38	272.521	273.184	272.987	272.933	272.907	272.921	272.906	272.713	272.402	272.171	271.966	272.448	272.806	273.157	273.385	273.232	272.629	272.092	272.355	272.717	273.186	273.128	273.174	273.228	273.393	273.481	273.799	273.805	273.785	273.664	273.426	273.279	272.764	273.112	274.094	274.725	274.283	273.799	273.79	273.62
	-64.5	271.504	271.959	271.846	271.78	271.713	271.913	271.997	272.283	272.243	272.99	272.92	273.016	272.913	272.989	273.164	273.097	272.952	272.416	272.238	272.612	273.259	273.971	273.759	273.027	272.354	271.831	271.998	272.047	272.26	272.35	272.723	272.991	273.05	273.196	273.798	273.849	273.941	274.075	274.143	274.08	273.771	273.727	273.967	273.991	273.367	273.106	273.557	273.935
	-65.25	271.894	272.382	272.059	272.095	271.86	271.896	271.927	272.124	272.13	272.734	272.727	272.794	272.747	272.992	273.094	273.349	273.191	272.836	272.61	272.886	273.32	274.004	273.642	272.844	272.373	272.039	271.97	271.781	271.799	271.861	272.139	272.602	272.689	272.69	273.143	272.742	273.344	273.471	273.349	273.509	273.136	273.097	272.982	273.392	272.718	272.47	273.134	273.588
	-66	271.96	271.878	272.062	271.559	271.864	272.142	272.029	272.113	272.759	272.753	272.566	272.374	272.353	272.391	272.412	272.874	273.025	273.188	272.996	273.279	272.544	272.455	272.495	272.849	273.186	272.841	272.804	272.887	272.86	272.712	272.173	271.737	271.509	271.709	271.826	272.189	270.458	269.533	268.818	268.697	268.589	269.22	271.843	272.8	273.341	273.461	273.717	273.91
	-66.75	272.348	272.121	271.677	271.794	271.818	272.039	272.099	272.195	272.993	272.722	272.536	272.06	271.748	271.938	272.146	272.563	272.963	273.372	273.367	273.636	272.37	271.754	272.132	273.136	273.402	273.351	272.917	272.944	272.913	272.484	271.552	271.027	271.75	271.745	270.01	269.38	269.132	268.574	267.216	266.704	266.724	267.976	269.933	272.461	272.78	272.657	272.505	272.247
	-67.5	272.059	271.702	271.865	271.572	271.105	270.953	271.018	271.283	271.708	271.721	271.939	271.716	271.819	272.181	272.75	273.076	273.522	274.344	274.274	274.546	274.672	274.568	274.546	274.298	273.995	273.162	272.574	271.892	271.351	270.755	270.439	270.464	270.607	270.133	269.09	267.889	266.79	265.661	264.984	264.569	264.497	265.04	266.047	266.978	267.299	267.551	267.957	268.517
	-68.25	272.65	272.392	272.663	271.995	271.105	270.591	270.644	270.929	271.017	271.194	271.574	271.302	271.589	272.167	273.116	274.029	274.496	274.525	274.406	274.488	275.461	275.094	274.324	272.979	271.594	270.411	269.702	268.715	268.204	267.812	268.356	269.137	269.312	269.24	269.067	268.22	267.32	266.59	266.755	266.52	266.129	265.585	265.433	264.927	264.731	264.883	265.371	266.202
	-69	274.116	274.359	273.64	272.628	271.69	271.015	270.749	270.804	271.406	271.247	270.942	271.009	271.066	271.755	273.347	274.769	275.488	275.827	275.956	275.583	274.468	273.037	271.93	269.986	268.239	266.917	266.125	265.394	264.966	264.542	264.561	264.832	264.763	265.234	266.292	266.679	266.688	266.426	265.414	264.726	263.91	262.915	262.355	261.627	260.961	260.698	260.788	261.428
	-69.75	272.946	273.053	271.925	271.077	270.571	269.404	268.977	269.916	269.274	271.316	269.251	268.348	268.426	269.508	270.591	274.464	272.926	273.799	274.026	272.832	271.522	269.336	267.704	265.494	263.512	261.863	261.206	263.289	260.681	260.535	259.94	259.877	259.934	261.651	262.193	263.618	264.761	265.317	263.467	261.644	260.436	259.114	259.049	258.375	257.466	257.241	255.898	257.091
[truncated: 152 more columns]
