# Supplementary material for: Temperature Field Data Reconstruction Using the Sparse Low-Rank Matrix Completion Method
Source: Hindawi journal article supplement (doi:10.1155/2019/3676182), 2019-11-03
Supplement: f1 [file 3676182.f1.zip › data/ERA Interim/Tabel MC.xlsx]

## Sheet: Sheet1
		24.75	25.5	26.25	27	27.75	28.5	29.25	30	30.75	31.5	32.25	33	33.75	34.5	35.25	36	36.75	37.5	38.25	39	39.75	40.5	41.25	42	42.75	43.5	44.25	45	45.75	46.5	47.25	48	48.75	49.5	50.25	51	51.75	52.5	53.25	54	54.75	55.5	56.25	57	57.75	58.5	59.25	60
	79.5	257.462	257.243	257.185	257.209	256.829	256.644	256.765	256.989	256.844	258.829	256.47	256.287	256.354	256.81	255.936	255.097	255.909	255.41	255.308	255.618	255.241	255.519	255.151	254.742	255.067	254.397	254.301	253.745	254.154	253.394	252.835	252.986	252.937	252.245	252.964	252.403	252.687	251.832	251.463	250.578	250.944	250.263	250.12	249.802	250.37	250.558	250.007	249.558
	78.75	258.788	258.813	258.577	258.617	258.088	257.994	258.219	258.106	258.376	259.82	258.021	257.946	258.027	258.37	257.611	256.771	257.761	257.261	257.082	257.274	257.096	257.174	257.123	256.888	257.246	256.495	256.212	255.256	256.456	255.763	255.047	255.102	255.098	254.349	255.012	254.51	254.702	253.87	253.688	252.911	253.179	252.735	252.524	252.143	252.636	252.743	252.637	251.908
	78	263.235	263.342	262.952	263.075	262.443	262.306	262.594	262.05	262.797	262.61	262.22	262.165	262.21	262.463	261.499	260.981	261.78	261.313	260.706	261.592	260.696	261.059	260.859	260.587	261.04	260.224	259.485	257.857	259.859	259.448	258.605	258.506	258.44	257.534	258.264	257.035	257.762	256.761	256.505	255.612	255.768	255.351	255.03	254.57	254.975	255.253	255.106	254.443
	77.25	266.545	266.746	266.209	266.364	265.457	265.442	265.794	265.263	266.025	264.363	265.243	265.25	265.3	265.528	264.396	263.186	264.732	264.076	263.546	264.2	263.42	263.489	263.378	263.12	263.699	262.844	262.062	260.229	262.587	261.949	260.916	260.756	260.634	259.362	260.338	259.111	259.62	258.273	258.302	257.399	257.551	257.021	256.594	256.315	256.638	256.895	256.903	255.822
	76.5	268.927	268.977	268.49	268.718	268.065	267.802	268.082	268.1	268.275	266.413	267.149	267.103	267.05	267.25	265.774	265.893	266.106	265.729	265.057	267.164	264.575	265.575	264.551	264.022	264.68	263.894	262.962	262.342	263.164	262.707	261.705	261.465	261.251	260.334	260.975	259.431	260.101	258.865	258.233	257.056	257	256.356	255.936	255.707	255.73	256.29	255.718	255.094
	75.75	268.742	268.894	268.273	268.484	267.51	267.505	267.758	267.692	268.054	270.043	266.918	266.852	266.885	267.156	265.523	271.151	265.956	265.265	264.842	264.776	264.266	263.829	264.031	263.66	264.511	263.514	262.781	263.798	263.308	262.365	261.262	260.93	260.768	262.277	260.287	258.976	259.377	259.972	257.564	256.285	256.431	255.858	255.356	254.996	255.18	255.545	255.316	254.165
	75	269.905	269.822	269.355	269.609	268.975	268.705	268.875	268.868	269.081	269.767	267.866	267.75	267.627	267.924	266.107	258.969	266.466	266.04	265.289	266.082	264.626	264.97	264.642	264.033	264.731	263.864	262.89	259.006	262.957	262.476	261.558	261.216	260.967	256.128	260.644	258.658	259.718	255.995	257.509	256.018	256.096	255.401	254.93	254.521	254.658	255.307	254.326	254.019
	74.25	270.249	270.184	269.725	269.948	268.985	268.832	269.083	268.941	269.25	266.917	267.965	267.822	267.812	268.121	266.333	267.977	266.551	265.774	265.074	267.944	264.581	265.866	264.23	263.629	264.436	263.568	262.671	262.109	262.724	261.975	260.922	260.725	260.417	260.153	260.042	258.045	258.965	258.131	256.892	255.678	255.815	254.767	254.249	254.128	254.424	254.963	254.41	253.343
	73.5	270.615	270.441	270.009	270.258	269.383	269.173	269.332	269.429	269.508	269.437	268.094	267.881	267.837	268.199	266.157	268.899	266.386	265.662	264.96	267.299	264.251	265.285	263.884	263.178	264.062	263.153	262.278	262.201	262.202	261.407	260.413	260.144	259.815	259.793	259.412	257.255	258.301	257.687	255.918	254.457	254.618	253.545	253.024	252.8	253.063	253.706	252.821	251.996
	72.75	272.747	272.571	272.108	272.385	271.467	271.228	271.297	271.455	271.538	275.065	269.902	269.625	269.524	269.906	267.421	269.352	267.791	267.033	266.228	269.411	265.251	266.712	264.89	264.162	265.239	264.126	263.128	262.296	263.069	262.201	261.176	260.749	260.404	259.361	259.778	257.213	258.517	257.479	255.741	254.018	254.146	253.085	252.461	251.993	252.308	253.013	252.113	251.202
	72	273.443	273.212	272.671	273.047	272.227	271.846	271.962	272.026	272.173	272.175	270.31	270.056	269.89	270.193	267.599	268.625	267.974	267.417	266.253	269.434	265.201	266.702	264.968	264.052	265.105	264.127	262.764	261.552	262.585	262.097	261.041	260.526	260.08	258.556	259.558	256.428	258.157	256.505	255.089	253.221	253.213	252.099	251.455	251.099	251.148	252.141	250.745	250.338
	71.25	272.56	272.315	271.719	272.137	271.369	270.959	271.063	270.979	271.302	271.945	269.399	269.118	268.955	269.246	266.599	271.146	267.021	266.554	265.216	267.4	264.138	265.07	264.017	263.064	264.14	263.151	261.648	261.424	261.51	261.168	260.135	259.535	259.089	259.11	258.585	255.193	257.2	256.563	254.007	251.993	251.989	250.975	250.332	249.855	249.847	250.942	249.342	249.224
	70.5	271.739	271.599	271.123	271.41	270.75	270.408	270.332	272.058	270.624	279.594	268.634	268.428	268.172	268.529	265.63	263.159	266.189	265.745	265.623	268.727	263.829	265.371	263.302	262.496	263.756	262.586	261.993	261.717	261.893	260.556	259.476	258.885	258.57	254.924	257.734	256.239	256.353	253.799	253.176	251.121	250.964	250.082	249.46	249.041	248.83	249.56	248.476	247.542
	69.75	270.642	270.449	269.844	270.253	269.628	269.197	269.237	269.238	269.542	274.135	267.723	267.427	267.256	267.541	264.896	271.447	265.44	265.127	263.837	265.216	262.673	263.193	262.721	261.85	262.949	261.856	260.4	260.849	260.401	260.079	259.111	258.421	258.064	258.775	257.497	254.287	256.245	256.319	253.054	250.922	250.889	250.164	249.55	248.789	248.763	249.823	248.274	248.324
	69	268.067	267.991	267.316	267.681	266.637	266.448	266.631	266.477	266.899	266.955	265.118	264.926	264.836	265.115	262.67	267.296	263.107	262.391	261.364	263.037	260.407	260.896	260.088	259.335	260.426	259.404	258.116	258.051	258.257	257.575	256.416	255.878	255.477	255.817	254.89	252.061	253.507	253.118	250.727	248.974	249.043	248.047	247.372	247.048	247.118	247.951	246.931	246.153
	68.25	266.443	266.399	265.823	266.209	265.623	265.087	265.259	265.447	265.502	265.175	263.647	263.486	263.271	263.389	260.995	263.883	261.528	261.344	260.075	265.374	259.01	261.736	259.047	258.209	259.223	258.27	256.718	256.65	256.703	256.559	255.467	254.893	254.509	253.834	253.951	251.052	252.608	251.602	249.671	247.949	247.591	246.803	246.196	245.759	245.518	246.55	245.44	245.118
	67.5	266.25	266.024	265.521	265.855	265.037	264.726	264.855	264.984	265.044	264.707	263.351	263.115	263.001	263.323	260.972	263.66	261.271	260.675	259.715	262.09	258.779	259.834	258.475	257.621	258.595	257.691	256.545	256.282	256.386	255.784	254.772	254.352	253.945	253.541	253.502	250.803	252.225	251.285	249.435	247.72	247.782	246.687	246.108	245.85	245.927	246.802	245.522	245.034
	66.75	267.473	267.694	266.892	267.064	264.959	265.529	265.823	266.001	266.131	266.482	264.481	264.456	264.548	265	262.617	260.021	262.97	261.094	261.375	261.746	260.451	259.738	259.068	258.779	260.086	258.854	258.561	256.543	259.21	256.868	255.305	255.008	254.647	252.131	253.671	252.532	252.057	249.93	250.109	248.922	249.442	248.001	247.136	247.431	247.971	247.963	248.474	245.27
	66	268.322	268.489	267.69	267.921	265.919	266.34	266.65	265.835	266.968	266.276	265.38	265.255	265.353	265.762	263.382	264.307	263.764	262.013	261.496	262.809	260.893	260.724	259.926	259.586	260.837	259.563	258.683	256.22	259.296	257.643	256.185	255.813	255.431	254.348	254.53	252.14	252.969	251.809	250.861	249.594	250.112	248.754	247.874	247.813	248.547	248.76	249.056	246.419
	65.25	270.546	270.591	269.862	270.181	268.749	268.76	269.004	268.754	269.288	268.541	267.464	267.314	267.273	267.57	265.057	267.936	265.496	264.39	263.574	266.393	262.665	263.598	262.04	261.422	262.629	261.496	260.331	259.485	260.634	259.548	258.21	257.727	257.309	256.892	256.541	253.89	254.992	254.155	252.386	250.838	250.983	249.789	249.005	248.849	249.103	249.719	249.286	247.63
	64.5	272.162	272.956	271.631	271.916	269.37	270.126	270.661	269.271	271.217	270.847	269.495	269.652	269.766	269.936	267.56	266.398	268.447	266.537	266.046	266.071	265.388	264.074	264.507	264.608	266.083	264.517	263.291	259.233	264.954	263.12	261.176	260.48	260.186	257.724	258.857	256.75	257.061	255.199	255.311	254.158	254.489	253.658	252.529	252.355	252.868	252.839	254.251	250.643
	63.75	273.895	274.172	273.399	273.867	273.436	272.671	273.03	273.612	273.305	268.522	271.117	271.172	270.858	270.649	268.345	273.517	269.12	269.417	267.987	276.995	266.728	271.482	266.96	266.108	267.175	266.308	264.329	266.323	264.565	264.82	263.436	262.738	262.332	262.768	261.69	259.044	260.132	259.653	257.154	255.601	254.609	254.076	253.431	253.211	252.287	253.502	252.717	252.272
	63	275.877	277.29	275.514	275.892	273.478	274.19	274.951	273.791	275.699	274.793	273.842	274.356	274.389	274.152	272.092	272.602	273.521	272.23	271.771	271.366	270.879	269.202	270.457	270.839	272.356	270.753	269.137	266.646	271.682	270.185	267.878	266.851	266.699	264.86	265.184	263.95	263.362	261.957	261.92	260.852	260.552	260.611	259.437	259.183	258.852	258.833	260.897	257.229
	62.25	276.12	277.18	275.736	276.298	275.463	275.046	275.689	274.164	276.317	273.398	274.474	274.822	274.554	274.031	272.145	273.048	273.641	274.012	271.852	276.34	271.092	272.943	272.213	272.048	273.107	271.848	268.936	265.952	270.678	271.578	269.863	268.667	268.494	266.244	267.54	264.298	266.117	264.3	263.833	262.333	261.272	261.919	261.05	260.029	259.132	260.139	260.481	259.929
	61.5	275.573	278.38	275.539	275.677	271.189	273.724	275.002	274.674	276.147	276.84	274.681	276.087	276.458	276.171	274.938	259.077	276.912	273.993	276.632	263.208	275.516	265.45	273.555	275.349	277.186	275.235	275.484	269.484	280.547	275.815	272.293	271.228	271.42	263.028	269.109	273.116	267.062	261.513	268.042	267.948	268.196	268.844	267.301	268.204	267.642	265.817	271.279	263.244
	60.75	276.541	278.764	276.591	276.89	274.48	275.443	276.542	276.676	277.424	274.391	275.825	276.916	276.992	276.364	275.368	277.157	277.169	276.316	277.149	274.725	276.108	273.156	275.631	276.562	277.948	276.523	275.536	277.14	279.177	277.133	274.356	273.344	273.47	273.264	271.885	273.962	270.28	269.861	270.141	269.778	268.898	269.864	268.81	269.119	267.777	267.218	270.731	266.026
	60	277.806	280.124	277.875	278.238	276.126	276.912	278.02	277.219	278.986	277.457	277.576	278.664	278.674	277.93	277.059	275.364	279.093	278.648	278.738	275.767	277.937	274.807	278.202	279.217	280.463	278.951	277.331	275.905	281.189	279.996	277.346	276.13	276.337	273.968	274.799	275.952	273.393	271.75	273.215	272.687	271.69	273.18	272.134	271.844	270.531	270.16	273.504	269.693
	59.25	274.47	276.624	274.612	274.974	273.643	274.021	275.093	274.468	275.958	273.281	274.876	275.942	275.889	275.067	274.728	273.942	276.652	276.94	276.752	274.218	276.162	273.707	277.004	277.866	278.734	277.522	275.799	275.399	279.303	278.926	276.623	275.519	275.802	274.217	274.69	275.945	273.717	272.463	273.65	273.17	271.942	273.751	272.984	272.544	270.978	270.85	273.552	271.064
	58.5	272.841	273.871	272.519	273.25	275.039	273.469	274.117	275.643	274.635	270.234	273.189	273.935	273.371	272.312	272.074	283.826	273.724	277.129	275.451	273.148	274.055	273.344	276.719	276.07	276.187	276.077	273.407	281.374	274.862	277.507	276.38	275.086	275.24	279.376	275.518	275.47	275.28	276.877	273.253	271.408	269.057	271.541	271.589	270.686	267.243	269.094	267.092	270.813
	57.75	272.091	273.95	272.245	272.591	272.11	272.071	272.998	274.065	273.72	271.868	272.648	273.687	273.543	272.723	272.627	276.664	274.342	275.377	275.691	273.208	274.704	272.747	275.599	276.12	276.774	275.946	274.74	279.257	277.622	277.354	275.353	274.409	274.724	275.904	273.996	276.451	273.319	273.655	273.069	272.466	270.945	272.833	272.394	272.199	270.018	270.126	271.897	270.468
	57	271.54	273.323	271.706	272.058	271.683	271.538	272.454	272.319	273.176	271.291	272.379	273.297	273.169	272.362	272.386	275.268	274.091	275.166	274.716	273.057	274.215	272.795	275.584	276.141	276.652	275.75	274.05	275.96	276.878	277.288	275.482	274.533	274.87	275.28	274.237	275.468	273.738	273.715	273.509	272.915	271.511	273.497	273.065	272.408	270.657	270.866	272.549	271.662
	56.25	271.119	272.738	271.432	271.642	271.311	271.192	271.827	271.805	272.59	280.879	272.01	272.687	272.562	271.996	271.657	272.281	273.357	274.165	273.934	274.078	273.354	273.033	274.666	275.352	275.999	274.709	273.414	273.647	276.045	276.043	274.492	273.59	274.043	272.676	273.144	274.304	272.814	272.393	272.425	271.683	270.543	272.484	272.044	270.792	269.732	269.676	271.677	270.437
	55.5	270.446	271.717	270.516	270.832	271.039	270.589	271.228	271.916	271.81	273.691	271.073	271.753	271.551	270.964	270.799	272.66	272.215	273.56	273.232	271.477	272.505	271.456	273.891	274.094	274.476	273.718	272.392	274.817	274.404	274.871	273.504	272.699	273.011	272.855	272.645	273.838	272.374	272.006	271.665	270.73	269.453	271.203	270.974	270.205	268.541	268.965	269.577	269.699
	54.75	271.213	272.076	271.273	271.603	272.455	271.487	271.979	272.785	272.397	273.065	271.647	272.125	271.798	271.243	270.982	270.621	272.169	273.974	273.06	275.565	272.397	274.148	274.134	273.958	274.148	273.569	271.954	273.55	273.144	274.387	273.388	272.713	272.939	271.599	272.85	273.068	272.692	271.456	271.473	270.418	268.967	270.48	270.401	269.476	267.867	268.697	268.435	269.664
	54	271.584	272.396	270.028	270.761	270.025	270.907	271.461	271.422	272.308	278.15	271.526	272.274	272.351	272.42	271.883	274.234	273.252	273.789	274.285	233.014	272.911	249.411	273.777	273.719	274.075	273.678	273.064	273.96	275.979	275.032	273.692	272.146	272.344	272.669	272.683	274.18	272.582	271.3	271.496	268.474	269.19	271.322	271.046	270.533	268.412	269.108	266.164	268.901
	53.25	270.803	271.565	270.765	271.154	272.335	271.196	271.672	273.12	272.043	271.398	271.166	271.684	271.292	270.693	270.474	271.044	271.624	273.81	272.993	274.141	272.083	273.246	273.886	273.508	273.615	273.257	271.687	274.899	272.686	274.083	273.144	272.441	272.636	271.897	272.741	273.286	272.619	271.506	271.21	269.982	268.373	269.958	269.985	269.237	267.178	268.23	267.331	269.232
	52.5	271.804	272.395	271.73	272.079	273.231	272.12	272.511	274.05	272.842	273.605	272.012	272.416	272.066	271.601	271.287	274.165	272.289	274.294	273.585	274.637	272.692	273.823	274.318	273.875	274.004	273.625	272.277	276.306	273.05	274.232	273.396	272.791	272.971	273.385	273.107	273.609	273.022	272.714	271.532	270.26	268.842	270.203	270.258	269.508	267.686	268.695	267.66	269.503
	51.75	270.375	270.568	270.211	270.566	272.34	270.883	271.083	273.466	271.286	273.538	270.449	270.711	270.266	269.904	269.52	271.783	270.307	272.753	272.098	273.105	270.964	272.477	272.702	271.91	271.881	271.727	270.593	275.612	270.684	272.098	271.609	271.099	271.247	271.395	271.678	272.246	271.783	271.183	269.876	268.322	266.859	268.113	268.37	267.614	265.616	266.908	264.831	267.765
	51	273.084	273.132	272.827	273.205	274.79	273.323	273.524	275.43	273.673	273.417	272.702	272.865	272.427	272.128	271.501	272.566	272.163	274.35	273.334	275.914	272.329	274.661	273.956	273.036	273.058	272.887	271.516	275.14	271.369	272.88	272.387	271.92	271.947	271.448	272.375	272.029	272.294	271.145	270.14	268.565	267.225	268.09	268.263	267.566	265.832	267.234	265	267.846
	50.25	272.721	273.027	272.527	272.794	273.421	272.61	272.912	274.042	273.16	273.933	272.396	272.624	272.371	272.218	271.602	268.787	272.287	273.464	272.928	273.246	272.223	272.825	273.292	272.814	273.014	272.54	271.543	272.351	271.988	272.534	271.761	271.362	271.434	269.238	271.529	271.552	271.311	269.28	269.779	268.531	267.707	268.36	268.316	267.732	266.653	267.449	266.409	267.594
	49.5	273.92	273.803	273.502	273.801	274.719	273.737	273.872	275.882	274.007	275.521	273.042	273.093	272.837	272.851	271.977	277.321	272.383	273.681	273.333	272.315	272.299	272.334	273.105	272.227	272.449	272.169	271.5	276.635	271.323	271.699	271.136	270.824	270.798	272.649	271.127	271.21	270.92	271.296	268.863	267.263	266.555	266.852	266.943	266.559	265.327	266.385	264.304	266.156
	48.75	274.792	274.817	274.445	274.648	274.797	274.265	274.484	275.648	274.653	275.454	273.84	273.899	273.774	273.91	272.996	272.967	273.352	273.791	273.607	272.81	272.932	272.747	273.313	272.736	273.077	272.56	272.044	273.677	272.171	271.938	271.179	270.982	270.944	270.34	271.02	270.954	270.648	269.568	269.017	267.753	267.445	267.399	267.296	267.011	266.446	267.069	265.944	266.444
	48	276.588	276.558	276.186	276.385	276.391	275.934	276.153	277.539	276.297	276.312	275.385	275.43	275.336	275.526	274.519	276.455	274.788	275.052	275.056	273.95	274.301	273.877	274.42	273.785	274.191	273.701	273.351	276.115	273.401	272.886	272.075	271.928	271.844	272.326	271.913	272.005	271.446	270.969	269.764	268.498	268.273	268.013	267.893	267.81	267.249	267.845	266.681	266.929
	47.25	276.48	276.381	276.094	276.274	276.177	275.722	275.907	276.349	276.057	276.917	275.296	275.211	275.145	275.4	274.31	274.649	274.555	274.617	274.112	274.384	273.696	274.017	273.996	273.417	273.812	273.166	272.515	272.785	272.51	272.277	271.571	271.436	271.347	270.782	271.369	270.435	270.937	269.978	269.216	267.968	267.917	267.57	267.391	266.964	266.908	267.497	266.455	266.721
	46.5	277.699	277.099	275.256	276.064	275.178	276.095	276.326	275.912	276.762	276.5	275.848	275.974	276.203	277.035	275.838	281.716	276.06	275.725	275.85	227.409	274.688	247.447	274.715	273.648	273.831	273.948	273.74	274.745	274.851	273.598	272.893	271.791	271.523	274.288	272.701	272.066	272.517	271.768	270.329	266.548	268.572	268.942	268.811	268.902	267.655	268.927	263.035	267.37
	45.75	277.616	277.289	277.158	277.363	277.669	276.96	277.059	278.43	277.124	277.911	276.203	276.039	275.954	276.224	275.102	285.304	275.19	275.603	275.252	276.092	274.562	275.377	274.777	273.904	274.29	273.843	273.398	279.008	272.968	272.771	272.198	272.136	272.009	276.377	272.226	271.651	271.848	273.936	269.81	268.41	268.205	267.747	267.724	267.476	267.071	267.889	266.207	267.013
	45	278.158	277.969	277.688	277.856	277.648	277.304	277.473	278.325	277.588	278.048	276.779	276.689	276.666	277.011	275.891	278.053	276.011	275.905	275.763	274.3	275.23	274.55	275.217	274.571	274.993	274.424	274.104	275.811	274.005	273.371	272.645	272.583	272.462	273.04	272.541	272.059	272.074	271.711	270.357	269.075	269.172	268.627	268.471	268.305	268.209	268.743	267.535	267.645
	44.25	279.24	278.934	278.805	278.983	279.146	278.531	278.66	279.63	278.719	278.704	277.929	277.78	277.706	278.01	276.959	281.114	277.025	277.258	276.854	277.452	276.356	277.018	276.585	275.798	276.122	275.645	275.171	277.862	274.793	274.59	274.012	273.993	273.868	275.396	274.083	273.344	273.72	273.953	271.847	270.549	270.469	269.958	269.899	269.636	269.449	270.17	268.651	269.306
	43.5	279.735	279.567	279.347	279.469	279.224	278.901	279.07	280.04	279.169	279.746	278.416	278.339	278.314	278.674	277.595	276.986	277.688	277.503	277.512	277.17	277.008	276.965	276.915	276.322	276.733	276.142	275.951	276.842	275.829	275.062	274.324	274.335	274.23	273.557	274.269	274.02	273.807	272.682	272.204	271.052	271.143	270.535	270.378	270.264	270.254	270.679	269.709	269.532
	42.75	280.169	279.769	279.648	279.815	279.794	279.321	279.379	279.727	279.473	282.073	278.81	278.547	278.523	278.969	277.766	280.572	277.81	277.75	277.177	275.875	276.828	276.374	277.071	276.339	276.694	276.065	275.564	276.294	275.21	274.927	274.44	274.387	274.271	274.893	274.443	273.126	274.128	273.94	272.199	270.744	270.995	270.425	270.312	269.774	270.012	270.671	269.078	269.768
	42	279.874	279.544	279.459	279.53	279.302	279.021	279.082	280.592	279.141	282.002	278.4	278.25	278.24	278.739	277.546	276.931	277.506	277.187	277.588	276.533	276.924	276.545	276.566	275.905	276.346	275.76	275.989	277.576	275.637	274.463	273.816	273.922	273.815	273.208	273.871	274.047	273.446	272.411	271.766	270.535	270.783	269.984	269.874	269.848	269.937	270.28	269.139	268.866
	41.25	279.152	278.804	278.578	278.724	278.428	278.204	278.379	278.864	278.444	277.6	277.869	277.698	277.801	278.275	277.393	285.358	277.293	276.979	276.839	272.7	276.61	274.416	276.491	275.812	276.124	275.66	275.511	278.967	275.311	274.597	273.987	274.067	273.943	277.77	274.245	273.71	273.943	275.541	272.428	271.191	271.616	270.912	270.837	270.752	270.9	271.387	269.936	270.22
	40.5	276.532	276.25	276.196	276.231	275.979	275.751	275.94	276.158	275.971	275.22	275.746	275.594	275.698	276.171	275.607	276.08	275.465	275.095	274.995	273.411	275.103	274.431	275.108	274.619	274.771	274.27	274.215	274.548	274.007	273.381	272.856	273.107	273.065	273.483	273.363	273.023	273.239	272.808	272.155	271.292	271.712	271.046	271.012	270.831	271.294	271.548	270.661	270.635
	39.75	278.718	278.292	278.272	278.299	277.887	277.751	277.898	278.632	277.888	277.088	277.491	277.271	277.443	278.029	277.282	285.335	276.977	276.365	276.61	274.289	276.531	275.353	276.086	275.463	275.748	275.288	275.579	279.577	275.188	274.063	273.5	273.834	273.726	277.987	274.03	274.009	273.79	275.743	272.549	271.615	272.181	271.176	271.147	271.252	271.707	271.941	270.881	270.542
	39	280.996	280.479	280.502	280.496	279.785	279.803	279.902	280.536	279.876	279.785	279.421	279.136	279.324	280.047	279.025	282.095	278.635	277.607	277.976	275.686	277.873	276.629	277.134	276.512	276.894	276.327	276.766	278.419	276.271	274.767	274.176	274.557	274.392	276.15	274.583	274.341	274.2	274.561	272.857	271.888	272.695	271.361	271.237	271.403	272.183	272.306	271.325	270.531
	38.25	279.66	278.488	278.934	279.115	279.584	278.646	278.629	277.397	278.41	273.212	278.164	277.465	277.536	278.19	277.324	288.436	276.671	276.693	274.701	276.118	275.378	276.832	276.058	274.8	274.689	274.453	273.346	274.752	271.797	272.842	272.994	273.362	273.064	278.322	273.991	270.205	274.017	276.371	271.822	270.452	271.078	269.803	269.94	269.263	270.255	271.443	268.471	270.851
	37.5	284.468	283.98	282.954	283.66	282.087	281.858	283.689	282.33	282.818	202.612	281.091	281.86	282.108	281.82	282.818	281.452	281.217	280.492	278.764	275.635	280.257	278.131	278.922	276.901	276.13	278.374	276.276	279.484	275.093	276.206	274.358	275.408	273.991	279.206	276.306	273.936	274.439	271.42	273.874	274.613	274.524	271.072	270.943	275.831	273.885	275.734	272.279	272.912
	36.75	286.748	285.982	286.033	286.056	285.021	285.152	285.144	285.776	285.09	285.78	284.328	283.894	284.082	285.002	283.367	284.454	282.846	281.359	281.719	278.812	281.397	279.708	280.254	279.44	280.029	279.357	279.858	280.191	279.067	277.152	276.542	276.9	276.588	277.07	276.67	275.737	275.996	275.456	274.123	272.841	273.952	272.092	271.836	272.091	273.154	273.354	271.967	270.952
	36	288.981	288.09	288.186	288.188	286.892	287.147	287.092	288.136	286.992	287.437	286.032	285.554	285.752	286.799	284.854	283.89	284.196	282.348	283.044	280.24	282.52	280.809	280.909	279.999	280.721	280.035	280.834	280.903	279.839	277.387	276.708	277.142	276.737	276.282	276.738	275.948	275.854	274.607	273.797	272.466	273.741	271.454	271.131	271.674	272.845	272.979	271.534	270.021
	35.25	292.095	290.606	291.027	291.205	291.069	290.477	290.245	292.158	289.933	286.889	288.594	287.937	287.884	288.874	286.684	286.648	285.801	285.065	284.995	284.068	284.083	284.076	283.038	281.338	281.806	281.608	281.891	283.691	279.768	278.549	278.312	278.709	278.118	277.944	278.679	276.801	277.861	276.237	274.698	272.769	273.603	271.194	271.131	271.684	272.155	273.226	269.629	270.559
	34.5	291.79	290.842	290.924	290.938	289.512	289.819	289.773	290.735	289.655	289.008	288.628	288.125	288.346	289.437	287.402	286.97	286.68	284.68	285.358	282.177	284.844	282.869	283.101	282.138	282.895	282.219	283.019	283.136	281.966	279.415	278.705	279.159	278.704	278.562	278.716	277.75	277.75	276.603	275.619	274.258	275.63	273.17	272.817	273.46	274.694	274.848	273.308	271.706
	33.75	292.037	291.084	291.258	291.226	289.804	290.105	290.005	290.517	289.911	291.81	289.058	288.481	288.704	289.84	287.783	284.552	287.093	285.013	285.497	283.468	285.162	283.86	283.583	282.725	283.467	282.636	283.353	281.377	282.308	279.875	279.261	279.723	279.321	277.57	279.254	277.898	278.383	276.47	276.297	274.965	276.42	274.018	273.645	273.965	275.547	275.615	274.305	272.653
	33	292.067	291.193	291.35	291.328	290.09	290.289	290.223	290.79	290.139	291.649	289.335	288.812	289.007	290.05	288.159	285.309	287.542	285.717	286.13	284.563	285.814	284.838	284.44	283.606	284.279	283.494	284.107	282.542	283.137	280.947	280.34	280.776	280.414	278.879	280.392	279.181	279.602	277.83	277.598	276.317	277.6	275.409	275.082	275.35	276.752	276.867	275.586	274.156
	32.25	291.565	291.022	291.012	290.9	289.062	289.675	289.74	289.879	289.745	291.428	289.121	288.722	289.041	290.078	288.378	284.387	287.858	285.482	286.278	284.494	286.2	284.766	284.523	284.087	284.864	283.876	284.72	282.208	284.316	281.539	280.67	281.158	280.876	279.006	280.589	279.98	279.737	277.949	278.354	277.471	278.919	276.751	276.293	276.658	278.366	278.006	277.893	275.142
	31.5	292.602	291.808	291.912	291.88	290.657	290.913	290.931	291.512	290.837	290.34	290.186	289.756	289.99	290.991	289.442	287.129	288.799	287.038	287.602	284.59	287.422	285.644	286.072	285.304	285.855	285.194	285.908	284.993	285.072	282.886	282.252	282.749	282.426	281.567	282.532	281.812	281.858	280.373	280.182	279.06	280.338	278.265	278.003	278.426	279.699	279.742	278.541	277.146
	30.75	291.521	290.678	290.797	290.772	289.445	289.735	289.776	289.08	289.688	288.222	289.284	288.763	289.043	290.086	288.633	283.906	287.96	286.037	285.954	282.637	286.267	284.298	285.224	284.527	284.966	284.232	284.525	280.459	283.721	282	281.481	281.977	281.651	279.522	281.826	279.962	281.251	278.998	279.67	278.581	280.086	278.013	277.711	277.809	279.549	279.624	278.413	277.304
	30	289.292	288.868	288.914	288.802	287.646	287.95	288.065	288.315	288.065	289.274	287.802	287.523	287.773	288.614	287.576	282.644	287.165	285.579	286.21	284.4	286.322	285.201	285.33	284.954	285.385	284.606	285.288	283.14	284.969	282.966	282.281	282.774	282.646	280.589	282.644	282.554	282.223	280.308	281.206	280.468	281.549	280.029	279.797	279.946	281.249	280.998	280.744	278.999
	29.25	289.908	289.275	289.319	289.297	288.523	288.647	288.722	289.383	288.675	288.89	288.333	288.012	288.257	289.104	288.142	291.703	287.63	286.449	287.004	282.034	286.957	284.236	286.091	285.435	285.767	285.243	285.921	287.813	285.361	283.625	283.089	283.542	283.381	285.606	283.694	283.65	283.402	283.963	282.115	281.068	282.122	280.686	280.608	280.842	281.74	281.81	280.578	279.891
	28.5	289.311	289.01	288.964	288.909	288.035	288.172	288.365	288.373	288.405	288.641	288.213	287.981	288.241	288.917	288.18	291.957	287.892	286.745	287.021	285.139	287.261	286.136	286.679	286.317	286.663	285.957	286.303	287.342	286.177	284.727	284.058	284.461	284.397	286.572	284.511	284.324	284.245	285.067	283.32	282.599	283.436	282.315	282.165	282.141	283.151	283.061	282.747	281.546
	27.75	288.334	288.05	288.115	288.049	287.668	287.545	287.74	288.173	287.736	287.39	287.687	287.53	287.7	288.263	287.849	287.689	287.586	286.965	287.253	286.567	287.489	287.307	287.25	286.855	286.986	286.448	286.78	287.351	286.534	285.502	284.96	285.407	285.409	285.86	285.696	285.956	285.643	285.298	284.841	284.216	284.757	283.919	283.918	283.867	284.568	284.569	284.092	283.482
	27	287.127	287.208	287.087	287.015	286.691	286.61	286.958	287.047	287.049	286.098	287.248	287.282	287.469	287.83	287.915	287.752	287.892	287.533	287.783	286.553	288.242	287.707	288.37	288.266	288.278	287.729	287.886	288.358	288.196	287.451	286.794	287.165	287.309	287.912	287.578	288.347	287.705	287.557	287.446	287.083	287.402	287.127	287.151	286.964	287.452	287.315	287.445	286.774
	26.25	286.88	287.072	286.871	286.831	286.532	286.397	286.895	286.791	286.951	280.815	287.161	287.313	287.498	287.72	288.107	287.705	288.076	287.867	287.948	287.433	288.592	288.447	288.831	288.725	288.615	288.239	288.17	288.796	288.562	288.131	287.381	287.793	287.908	288.791	288.306	289.093	288.413	288.155	288.372	288.237	288.38	288.148	288.194	288.24	288.498	288.432	288.636	288.041
	25.5	287.133	282.773	277.956	281.386	286.309	286.498	285.826	286.085	286.453	286.361	285.464	285.678	285.266	287.121	286.654	287.237	286.739	293.37	291.07	96.4428	286.57	181.154	291.976	286.574	283.579	288.287	286.452	286.623	286.648	291.027	293.561	288.921	288.233	288.831	296.205	292.815	299.376	290.092	292.03	277.565	283.024	288.606	290.626	289.664	281.003	288.73	257.734	290.442
	24.75	288.092	288.47	288.157	288.077	287.353	287.477	287.983	286.669	288.179	286.052	288.599	288.684	288.967	289.239	289.536	290.443	289.684	289.039	288.798	288.096	289.781	289.269	290.141	290.364	290.393	289.628	289.331	287.984	290.189	289.696	288.885	289.189	289.394	290.417	289.502	289.583	289.632	289.953	289.792	289.701	290.106	290.034	289.922	289.447	290.318	289.997	290.963	289.76
	24	289.29	289.309	289.323	289.256	289.341	288.981	289.294	289.468	289.351	288.612	289.615	289.613	289.738	290.033	290.23	290.803	290.212	290.253	290.236	291.052	290.738	291.554	291.201	291.009	290.906	290.42	290.396	291.317	290.509	290.246	289.736	290.123	290.296	291.181	290.679	291.256	290.949	291.029	290.588	290.216	290.321	290.197	290.32	289.954	290.337	290.363	290.271	290.168
	23.25	288.639	288.886	288.716	288.614	288.21	288.194	288.641	288.142	288.762	286.656	289.203	289.298	289.534	289.829	290.237	289.582	290.271	289.882	289.977	289.094	290.778	290.38	291.093	291.181	291.098	290.512	290.528	290.101	291.1	290.544	289.849	290.255	290.467	291.004	290.742	291.488	290.985	290.859	291.116	291.003	291.317	291.223	291.246	290.956	291.583	291.314	291.905	291.058
	22.5	288.66	288.988	288.795	288.659	288.129	288.216	288.662	288.047	288.824	288.389	289.343	289.443	289.711	290.022	290.442	289.943	290.529	290.004	290.202	289.247	291.046	290.532	291.32	291.535	291.498	290.803	290.901	290.253	291.635	290.911	290.18	290.58	290.839	291.379	291.01	291.899	291.274	291.319	291.541	291.487	291.862	291.828	291.819	291.436	292.202	291.789	292.712	291.538
	21.75	288.57	288.799	288.658	288.535	288.228	288.225	288.643	288.245	288.77	288.074	289.347	289.438	289.691	290.017	290.553	290.644	290.574	290.248	290.474	288.296	291.295	290.233	291.66	291.779	291.636	291.069	291.234	291.27	291.826	291.228	290.607	291.033	291.298	292.275	291.637	292.677	292.022	292.235	292.263	292.131	292.502	292.524	292.609	292.254	292.887	292.569	293.099	292.414
	21	289.709	289.927	289.824	289.7	289.433	289.359	289.779	289.424	289.898	289.088	290.427	290.475	290.754	291.057	291.585	298.416	291.584	291.298	291.439	290.832	292.279	292.064	292.625	292.706	292.615	292.035	292.158	294.823	292.694	292.153	291.529	291.982	292.243	296.469	292.568	293.526	292.941	295.312	293.124	293.037	293.33	293.308	293.409	293.044	293.669	293.389	293.994	293.231
	20.25	290.064	290.435	290.25	290.073	289.477	289.645	290.099	289.721	290.264	290.395	290.844	290.973	291.273	291.607	292.115	292.35	292.181	291.568	292.056	290.834	292.885	292.191	293.017	293.3	293.272	292.569	292.907	293.019	293.704	292.717	291.952	292.411	292.703	293.764	292.851	294.241	293.149	293.568	293.584	293.628	294.037	293.995	294.004	293.713	294.49	293.939	295.08	293.605
	19.5	290.906	291.108	291.031	290.907	290.625	290.53	290.949	290.2	291.062	289.842	291.646	291.677	291.927	292.238	292.734	293.864	292.742	292.417	292.324	292.314	293.291	293.447	293.771	293.87	293.73	293.112	293.054	292.82	293.557	293.207	292.617	293.063	293.311	294.67	293.632	294.134	293.999	294.525	294.161	294.081	294.41	294.366	294.432	293.951	294.739	294.48	295.084	294.413
	18.75	290.866	290.978	290.808	290.827	290.853	290.485	291.16	290.864	291.072	275.838	291.407	291.655	291.837	291.925	292.9	293.186	292.662	292.859	292.581	292.064	293.595	293.644	294.102	293.794	293.327	293.405	293.046	294.573	293.196	293.474	292.786	293.367	293.412	295.496	294.294	294.979	294.535	294.404	294.724	294.84	294.8	294.529	294.744	295.19	295.084	295.291	294.948	295.193
	18	291.512	291.556	291.648	291.523	291.646	291.305	291.643	291.603	291.682	290.797	292.212	292.214	292.382	292.691	293.179	293.184	293.107	293.13	293.142	294.236	293.905	294.922	294.454	294.367	294.142	293.668	293.733	294.266	293.877	293.668	293.223	293.724	293.961	294.824	294.419	295.19	294.863	294.989	294.816	294.646	294.805	294.743	294.927	294.509	295.061	294.957	295.103	294.943
	17.25	291.271	291.47	291.429	291.284	291.167	291.039	291.419	291.26	291.528	291.808	292.132	292.201	292.422	292.735	293.291	293.297	293.308	293.14	293.379	292.668	294.162	294.024	294.612	294.703	294.532	293.965	294.165	294.529	294.638	294.133	293.576	294.036	294.326	295.216	294.677	295.826	295.126	295.364	295.321	295.205	295.468	295.531	295.665	295.24	295.843	295.548	296.068	295.494
	16.5	292.075	292.131	292.2	292.091	292.232	291.871	292.23	292.016	292.274	290.766	292.82	292.827	292.996	293.282	293.814	294.322	293.756	293.823	293.704	294.688	294.532	295.487	295.168	295.078	294.829	294.368	294.321	294.802	294.494	294.421	293.978	294.462	294.698	295.806	295.185	295.796	295.644	295.9	295.605	295.434	295.578	295.56	295.746	295.292	295.832	295.769	295.878	295.837
	15.75	291.612	291.698	291.757	291.657	291.913	291.504	291.864	291.4	291.932	291.153	292.585	292.587	292.756	293.009	293.648	295.054	293.647	293.853	293.555	294.202	294.482	295.291	295.341	295.292	294.987	294.51	294.328	294.728	294.578	294.745	294.358	294.801	295.081	296.543	295.604	296.06	296.173	296.735	296.185	295.993	296.11	296.281	296.495	295.856	296.406	296.375	296.463	296.694
	15	291.735	291.838	291.882	291.777	292.036	291.646	292.028	291.954	292.077	290.348	292.684	292.742	292.905	293.146	293.839	294.772	293.811	294.04	293.993	294.275	294.814	295.426	295.542	295.472	295.158	294.761	294.746	295.795	294.986	294.987	294.552	295.03	295.302	296.736	295.854	296.77	296.398	296.826	296.469	296.323	296.394	296.531	296.769	296.333	296.717	296.658	296.735	296.867
	14.25	291.878	292.429	292.298	291.986	291.119	291.589	291.978	289.919	292.185	295.023	293.449	293.842	293.716	294.207	294.554	209.325	294.955	293.881	294.171	290.841	295.389	293.999	296.296	297.153	296.586	295.556	295.536	259.825	296.563	295.895	295.284	295.613	295.975	254.952	295.864	296.238	296.227	269.554	297.13	297.202	298.053	298.275	297.967	297.027	298.827	297.814	299.371	298.039
	13.5	292.334	292.446	292.508	292.391	292.67	292.273	292.627	292.597	292.691	292.27	293.305	293.351	293.502	293.751	294.393	294.417	294.397	294.632	294.61	295.19	295.392	296.184	296.142	296.097	295.804	295.353	295.36	296.019	295.611	295.583	295.16	295.622	295.912	296.784	296.415	297.348	296.969	297.13	297.013	296.84	296.902	297.077	297.307	296.789	297.21	297.127	297.263	297.358
	12.75	293.157	292.801	292.641	293.488	294.057	291.833	292.485	266.654	293.177	283.669	296.299	294.266	294.526	294.254	294.534	296.086	295.792	296.504	278.989	296.193	287.863	297.795	297.881	298.296	296.837	294.119	281.16	234.953	282.214	296.192	297.882	296.457	296.566	290.718	297.501	269.515	299.164	297.29	297.065	295.558	296.995	299.251	298.366	288.64	296.024	299.21	297.674	307.333
	12	293.816	294.372	292.416	293.551	292.731	291.786	295.348	293.744	293.921	149.478	292.169	294.52	294.61	292.764	297.47	279.804	295.562	297.06	294.395	293.033	297.401	296.574	297.079	294.656	292.169	297.023	293.036	296.94	292.386	296.738	293.851	295.469	293.65	296.479	297.958	297.655	295.928	287.109	297.803	300.911	298.71	295.684	296.046	304.498	298.917	301.785	297.812	300.351
	11.25	292.562	292.689	292.758	292.627	292.904	292.527	292.877	292.836	292.947	293.061	293.614	293.665	293.82	294.078	294.756	293.952	294.767	294.988	295.012	295.419	295.816	296.518	296.577	296.568	296.262	295.794	295.846	296.168	296.127	296.066	295.654	296.123	296.434	296.915	296.93	297.952	297.519	297.468	297.623	297.47	297.554	297.763	297.998	297.449	297.908	297.78	297.981	298.041
	10.5	292.544	292.661	292.736	292.61	292.921	292.522	292.873	292.838	292.938	292.821	293.605	293.657	293.807	294.058	294.752	294.029	294.759	295.018	295.016	295.433	295.823	296.549	296.611	296.587	296.265	295.816	295.848	296.232	296.109	296.097	295.696	296.166	296.475	297.009	296.993	297.995	297.592	297.555	297.687	297.528	297.596	297.814	298.06	297.513	297.946	297.843	297.994	298.129
	9.75	292.763	292.868	292.951	292.823	293.123	292.728	293.072	292.984	293.137	293.204	293.813	293.852	294.005	294.268	294.944	294.052	294.946	295.183	295.156	295.577	295.979	296.706	296.77	296.746	296.428	295.965	295.988	296.181	296.239	296.23	295.838	296.31	296.617	297.044	297.131	298.066	297.732	297.641	297.814	297.646	297.737	297.942	298.183	297.611	298.086	297.981	298.127	298.264
	9	293.235	293.334	293.409	293.288	293.596	293.193	293.531	293.54	293.597	293.757	294.229	294.267	294.415	294.677	295.315	295.168	295.32	295.571	295.571	295.942	296.339	297.035	297.103	297.057	296.759	296.3	296.337	296.957	296.576	296.538	296.136	296.596	296.896	297.663	297.404	298.373	297.984	298.102	298.017	297.817	297.892	298.087	298.327	297.776	298.206	298.12	298.222	298.366
	8.25	293.904	293.775	294.366	294.108	295.134	294.445	294.415	293.525	294.275	296.029	295.596	296.174	294.985	295.492	295.281	101.331	295.75	296.277	295.987	295.521	296.474	298.539	298.985	299.221	297.586	297.092	296.405	220.797	295.711	296.985	297.226	297.426	297.612	203.036	298.033	297.106	298.559	236.485	298.281	297.553	297.811	298.215	298.046	296.73	298.069	297.905	296.637	299.131
	7.5	294.108	294.176	294.261	294.156	294.505	294.052	294.376	294.34	294.439	294.58	295.024	295.044	295.167	295.427	295.989	294.937	296.002	296.295	296.182	296.892	296.925	297.838	297.744	297.655	297.362	296.898	296.84	296.966	297.023	297.084	296.699	297.134	297.415	297.64	297.923	298.671	298.477	298.235	298.396	298.136	298.189	298.369	298.599	298.004	298.431	298.411	298.401	298.671
	6.75	295.487	295.643	294.901	295.399	295.565	294.636	296.365	295.71	295.719	230.56	295.186	296.198	296.232	295.511	297.877	289.372	297.01	298.182	296.609	297.402	298.311	299.191	298.872	297.557	296.207	298.217	296.167	298.064	295.714	298.141	296.763	297.697	297.005	298.255	299.343	299.19	298.779	294.521	299.285	300.383	299.275	298.056	298.408	301.764	299.349	300.878	298.59	300.565
	6	295.9	295.986	296.019	295.931	296.165	295.754	296.082	295.887	296.168	296.482	296.679	296.69	296.813	297.079	297.509	295.821	297.561	297.757	297.564	298.203	298.283	299.091	299.074	298.993	298.765	298.236	298.09	297.589	298.327	298.354	297.92	298.304	298.564	298.332	299.001	299.512	299.471	298.952	299.302	298.982	299.069	299.212	299.383	298.751	299.232	299.221	299.243	299.407
	5.25	298.979	298.175	297.163	299.54	300	295.42	297.357	239.942	298.367	235.539	303.664	299.781	300.117	298.625	299.398	293.358	301.621	303.123	263.695	301.888	282.889	304.173	303.658	303.9	300.486	296.505	266.67	163.078	268.359	300.411	303.857	300.48	299.697	284.065	302.146	238.626	304.214	295.803	299.879	297.693	300.119	303.76	301.48	283.307	297.426	305.425	300.749	322.374
	4.5	297.157	297.293	297.254	297.168	297.165	296.875	297.233	296.916	297.34	297.302	297.776	297.797	297.951	298.234	298.562	297.535	298.628	298.606	298.462	298.989	299.175	299.785	299.802	299.765	299.63	299.035	298.898	298.408	299.243	299.066	298.528	298.896	299.132	299.195	299.472	299.932	299.825	299.497	299.666	299.369	299.527	299.566	299.663	299.101	299.659	299.58	299.8	299.582
	3.75	297.094	297.228	297.205	297.133	297.29	296.896	297.24	297.164	297.345	297.594	297.729	297.757	297.878	298.118	298.444	298.746	298.54	298.706	298.553	299.632	299.167	300.148	299.873	299.787	299.646	299.084	298.919	299.347	299.217	299.149	298.63	298.974	299.216	299.868	299.575	300.126	299.945	300.002	299.7	299.362	299.39	299.509	299.639	299.06	299.46	299.457	299.571	299.539
	3	297.41	297.505	297.497	297.434	297.626	297.207	297.543	297.365	297.639	297.695	298.042	298.052	298.169	298.42	298.747	298.569	298.824	299.011	298.768	299.626	299.419	300.306	300.177	300.063	299.895	299.348	299.131	299.186	299.382	299.402	298.921	299.264	299.499	299.909	299.898	300.287	300.288	300.163	300.008	299.636	299.691	299.802	299.941	299.329	299.757	299.795	299.788	299.912
	2.25	296.85	296.96	296.969	296.898	297.116	296.676	297.019	296.85	297.111	296.994	297.532	297.547	297.663	297.897	298.266	298.37	298.343	298.559	298.308	299.732	298.985	300.197	299.763	299.661	299.481	298.939	298.715	298.936	298.963	299.019	298.54	298.9	299.142	299.717	299.541	299.966	299.945	299.942	299.703	299.381	299.397	299.522	299.67	299.058	299.481	299.51	299.571	299.666
	1.5	295.769	295.889	295.918	295.823	296.086	295.665	295.991	296.122	296.081	296.791	296.539	296.578	296.692	296.937	297.362	296.896	297.434	297.68	297.657	298.617	298.26	299.243	298.981	298.901	298.706	298.185	298.146	298.689	298.401	298.312	297.842	298.226	298.497	298.879	298.903	299.743	299.354	299.248	299.189	298.885	298.895	299.062	299.243	298.681	299.041	299.007	299.1	299.147
	0.75	294.85	295.037	295.018	294.926	295.16	294.771	295.134	295.057	295.243	295.575	295.769	295.839	295.966	296.18	296.708	295.953	296.819	297.073	296.992	297.571	297.687	298.432	298.486	298.471	298.246	297.719	297.613	297.792	297.99	297.976	297.486	297.854	298.148	298.426	298.557	299.386	299.043	298.877	298.999	298.749	298.756	299.019	299.196	298.596	298.963	298.899	299.105	299.147
	0	293.874	294.164	293.775	293.906	293.973	293.481	294.466	294.139	294.282	266.893	294.429	294.968	295.078	294.884	296.294	290.234	296.034	296.568	296.054	296.088	297.206	297.583	297.83	297.391	296.69	297.211	296.399	296.652	296.617	297.447	296.503	297.119	297.03	296.856	298.199	298.981	298.245	295.814	298.663	299.099	298.662	298.361	298.589	299.728	298.927	299.39	298.85	299.383
	-0.75	293.77	293.922	293.946	293.855	294.235	293.769	294.124	294.123	294.213	294.328	294.783	294.848	294.965	295.165	295.782	295.946	295.869	296.261	296.145	296.8	296.86	297.723	297.747	297.694	297.408	296.942	296.831	297.557	297.135	297.254	296.826	297.215	297.519	298.31	298.006	298.88	298.566	298.705	298.53	298.283	298.243	298.556	298.786	298.175	298.477	298.464	298.539	298.819
	-1.5	293.541	293.702	293.727	293.636	294.029	293.558	293.917	293.87	294.007	294.04	294.599	294.67	294.783	294.975	295.619	295.042	295.713	296.123	295.982	296.668	296.721	297.612	297.643	297.602	297.298	296.835	296.701	297.088	297.016	297.176	296.754	297.142	297.452	297.888	297.946	298.802	298.52	298.432	298.508	298.273	298.226	298.563	298.796	298.167	298.474	298.459	298.547	298.855
	-2.25	293.414	293.599	293.614	293.518	293.881	293.426	293.792	293.715	293.888	293.978	294.483	294.563	294.676	294.863	295.503	294.29	295.612	295.998	295.865	296.704	296.61	297.57	297.527	297.51	297.215	296.733	296.595	296.688	296.943	297.084	296.644	297.029	297.342	297.455	297.81	298.675	298.373	298.095	298.384	298.17	298.12	298.463	298.683	298.049	298.372	298.334	298.498	298.729
	-3	293.244	293.438	293.47	293.381	293.861	293.325	293.688	293.78	293.78	293.797	294.342	294.435	294.522	294.669	295.327	294.675	295.457	295.983	295.839	297.348	296.529	297.91	297.507	297.462	297.155	296.702	296.534	297.161	296.848	297.084	296.653	297.029	297.347	297.716	297.829	298.769	298.402	298.286	298.374	298.16	297.999	298.397	298.641	298.008	298.215	298.227	298.349	298.69
	-3.75	294.042	294.168	291.312	294.006	293.607	290.221	294.856	260.809	293.985	109.371	294.928	295.192	295.487	292.462	297.871	296.171	297.237	300.052	274.934	289.182	288.447	296.033	299.753	297.371	292.934	296.187	275.123	228.306	275.581	298.59	297.871	297.214	294.823	298.342	300.673	264.387	299.739	292.076	299.368	301.251	300.222	299.648	298.791	297.476	298.864	306.606	299.222	315.053
	-4.5	293.735	293.878	293.904	293.83	294.286	293.765	294.12	293.902	294.213	294.243	294.818	294.868	294.974	295.154	295.797	295.71	295.906	296.387	296.075	296.766	296.859	297.778	297.899	297.837	297.512	297.048	296.786	297.036	297.086	297.419	297.033	297.393	297.702	298.297	298.224	298.828	298.824	298.845	298.757	298.476	298.416	298.801	299.04	298.319	298.636	298.687	298.669	299.184
	-5.25	293.643	293.745	293.827	293.754	294.318	293.707	294.035	293.957	294.113	294.393	294.678	294.703	294.784	294.956	295.555	296.181	295.652	296.226	295.872	297.566	296.606	298.139	297.679	297.562	297.241	296.787	296.504	297.207	296.695	297.106	296.757	297.124	297.426	298.306	297.955	298.504	298.554	298.781	298.387	298.085	297.954	298.321	298.579	297.836	298.117	298.224	298.128	298.742
	-6	293.449	293.65	293.735	293.601	293.952	293.484	293.838	293.593	293.931	294.579	294.608	294.67	294.772	294.967	295.614	291.043	295.728	296.055	295.863	298.21	296.71	298.533	297.675	297.722	297.41	296.861	296.695	295.161	297.023	297.207	296.793	297.215	297.547	295.969	297.96	298.696	298.542	297.287	298.619	298.503	298.452	298.775	298.978	298.247	298.747	298.638	299.029	299.097
	-6.75	293.599	293.786	293.825	293.717	294.078	293.62	293.978	293.851	294.075	294.528	294.7	294.77	294.882	295.075	295.715	293.679	295.826	296.192	296.045	297.299	296.82	298.019	297.753	297.757	297.46	296.951	296.812	296.472	297.154	297.302	296.874	297.27	297.592	297.277	298.042	298.87	298.616	298.109	298.646	298.456	298.411	298.752	298.968	298.293	298.678	298.616	298.848	299.032
	-7.5	293.644	294.146	294.341	293.917	293.797	293.991	294.174	294.005	294.174	296.302	295.529	296.529	295.44	295.968	295.884	85.4281	296.556	296.065	297.455	293.882	297.698	297.49	299.192	300.083	298.686	297.963	298.305	218.117	298.611	298.042	297.637	297.903	298.187	196.208	298.065	299.668	298.273	231.47	299.036	298.887	299.378	299.721	299.289	298.708	300.08	298.96	299.574	299.38
	-8.25	293.742	293.966	293.98	293.864	294.105	293.707	294.095	293.695	294.203	294.137	294.863	294.931	295.075	295.269	295.937	294.645	296.048	296.297	296.077	297.515	296.968	298.199	297.882	297.94	297.655	297.109	296.915	296.428	297.333	297.473	297.012	297.419	297.741	297.811	298.161	298.848	298.718	298.481	298.831	298.712	298.717	299.029	299.214	298.526	299.023	298.912	299.316	299.32
	-9	293.326	293.5	293.591	293.456	293.799	293.347	293.707	293.557	293.785	293.942	294.466	294.523	294.652	294.86	295.556	293.712	295.619	295.929	295.811	297.758	296.663	298.25	297.554	297.575	297.259	296.754	296.67	296.408	296.968	297.083	296.671	297.129	297.456	297.331	297.914	298.786	298.509	298.142	298.617	298.52	298.496	298.774	299.001	298.354	298.825	298.713	299.055	299.113
	-9.75	293.561	293.713	293.761	293.657	293.996	293.546	293.912	293.437	294.003	293.872	294.7	294.736	294.874	295.086	295.775	294.753	295.851	296.173	295.844	296.809	296.772	297.801	297.773	297.776	297.441	296.936	296.694	296.162	297.022	297.299	296.913	297.323	297.639	297.844	298.14	298.656	298.753	298.567	298.81	298.629	298.663	298.983	299.202	298.463	298.97	298.93	299.106	299.408
	-10.5	293.744	293.914	293.968	293.826	294.041	293.699	294.057	293.934	294.144	294.626	294.828	294.888	295.047	295.304	295.973	294.304	296.014	296.178	296.211	296.847	297.038	297.836	297.794	297.838	297.551	297.033	297.079	296.906	297.429	297.326	296.885	297.348	297.671	297.69	298.116	299.138	298.693	298.399	298.841	298.719	298.812	299.036	299.247	298.663	299.179	299.001	299.353	299.264
	-11.25	293.692	293.607	291.478	292.036	290.26	292.225	292.811	289.384	293.409	292.603	294.302	294.641	295.366	296.398	297.047	297.331	297.213	295.88	296.289	235.771	296.996	262.67	297.369	297.39	296.95	296.925	297.19	292.184	299.728	298.129	297.449	296.686	296.856	298.474	298.364	298.776	299.174	297.89	299.451	296.595	299.786	300.89	300.864	300.557	300.617	300.755	296.548	300.083
	-12	294.828	294.638	294.979	295.039	296.458	295.324	296.228	294.914	295.179	237.786	296.281	298.576	295.847	295.784	296.512	-126.842	296.602	297.996	297.191	292.811	297.975	299.779	301.611	301.154	297.029	298.925	296.442	137.414	294.274	298.229	298.1	298.624	297.819	95.4688	299.833	297.849	299.254	162.352	299.644	299.798	299.29	298.537	298.063	300.16	299.629	300.441	295.859	301.772
	-12.75	294.508	294.579	294.662	294.545	294.824	294.422	294.768	294.653	294.823	294.34	295.459	295.479	295.639	295.914	296.551	296.792	296.523	296.732	296.659	297.089	297.484	298.204	298.241	298.175	297.869	297.419	297.416	297.989	297.62	297.614	297.219	297.696	297.98	298.969	298.511	299.328	299.081	299.305	299.102	298.909	299.02	299.155	299.391	298.853	299.335	299.267	299.33	299.489
	-13.5	294.455	294.575	294.637	294.496	294.613	294.312	294.666	294.465	294.74	294.817	295.391	295.414	295.602	295.9	296.503	296.528	296.488	296.522	296.54	297.106	297.391	298.102	298.039	298.051	297.8	297.275	297.341	297.637	297.638	297.447	296.999	297.487	297.78	298.647	298.223	299.106	298.754	298.978	298.856	298.724	298.9	298.99	299.182	298.647	299.251	299.072	299.392	299.201
	-14.25	295.136	295.63	296.252	295.53	295.013	295.67	295.6	292.757	295.358	294.351	297.892	299.791	297.072	298.091	296.952	-194.457	298.17	296.636	297.996	290.885	298.467	298.216	301.62	303.392	300.245	299.265	298.839	106.306	298.499	298.725	298.77	298.855	298.918	59.4641	298.39	297.388	298.201	141.59	299.416	299.138	300.565	300.643	299.321	298.165	301.641	299.721	299.849	300.783
	-15	293.623	294.43	294.861	294.034	293.249	294.362	294.531	294.633	294.04	279.875	296.406	299.299	295.971	296.938	296.041	-296.973	297.252	295.573	299.484	286.307	298.928	295.902	301.277	303.188	299.37	299.168	300.057	75.5137	299.636	298.432	297.979	298.278	298.157	11.1623	297.761	300.638	297.066	108.053	299.139	299.323	300.541	300.257	298.807	299.703	301.992	299.531	299.484	299.652
	-15.75	295.457	295.484	295.585	295.456	295.554	295.226	295.549	295.149	295.609	295.695	296.223	296.176	296.366	296.707	297.185	297.778	297.125	297.095	296.932	297.785	297.819	298.693	298.471	298.416	298.187	297.638	297.606	297.625	297.783	297.668	297.264	297.75	298.006	299.035	298.458	298.905	298.954	299.281	298.9	298.69	298.937	298.91	299.083	298.485	299.215	299.105	299.264	299.179
	-16.5	295.257	295.388	295.405	295.249	295.065	294.933	295.308	294.87	295.392	295.078	296.021	296.032	296.271	296.631	297.139	296.91	297.088	296.792	296.874	296.99	297.788	298.104	298.22	298.285	298.113	297.517	297.645	297.385	298.015	297.556	297.027	297.538	297.8	298.575	298.161	298.936	298.59	298.75	298.743	298.654	299.002	298.912	299.027	298.571	299.375	299.087	299.607	298.977
	-17.25	295.325	295.319	295.466	295.311	295.323	295.04	295.357	294.908	295.394	295.154	296.04	295.977	296.177	296.563	297.027	295.451	296.906	296.733	296.625	297.854	297.568	298.641	298.121	298.077	297.843	297.285	297.329	296.431	297.443	297.22	296.821	297.368	297.609	297.662	298.051	298.48	298.528	298.216	298.518	298.372	298.697	298.539	298.698	298.154	299.018	298.847	299.084	298.819
	-18	295.072	295.316	294.136	294.804	294.04	293.443	295.878	294.395	294.919	199.309	294.025	295.457	295.666	294.703	297.891	288.641	296.44	297.024	295.232	294.455	297.681	297.243	297.426	295.792	294.115	297.091	294.592	297.406	294.087	296.655	294.642	295.992	294.834	298.249	297.833	297.518	296.625	291.688	297.862	299.894	298.808	296.467	296.735	302.181	299.114	300.873	298.35	299.663
	-18.75	296.138	294.474	291.336	292.837	291.844	293.91	294.725	290.548	294.783	257.891	295.217	296.172	296.229	297.671	298.474	196.048	297.816	297.569	297.049	189.194	297.176	237.861	298.47	296.589	294.275	296.838	296.022	252.818	297.125	297.506	297.439	296.067	295.288	249.521	299.627	297.621	300.36	263.25	299.185	293.628	298.331	299.003	299.259	301.101	298.804	301.259	287.71	300.152
	-19.5	294.787	293.218	289.182	290.86	288.559	291.777	292.699	287.167	293.17	264.513	293.654	294.243	295.278	297.031	298.073	298.19	297.344	295.991	295.76	168.349	296.195	224.537	296.489	294.807	293.309	295.549	295.36	288.526	297.954	296.789	296.421	294.738	294.132	298.326	298.513	296.988	299.523	295.162	298.706	292.487	298.488	299.497	299.792	301.4	299.312	301.517	287.969	299.706
	-20.25	296.578	295.748	295.892	296.812	297.048	294.643	295.046	262.133	295.88	292.786	299.899	297.048	297.304	297.371	296.874	275.253	298.284	298.203	276.441	297.911	287.436	299.801	299.499	300.152	298.485	294.742	278.937	209.685	279.787	296.603	299.107	297.321	297.379	277.719	298.128	261.978	300.063	290.392	297.178	295.108	297.648	299.879	298.546	285.992	296.419	300.056	298.218	309.702
	-21	295.972	295.824	295.988	295.864	295.638	295.408	295.845	294.699	295.734	286.691	296.375	296.392	296.506	296.932	297.421	272.97	297.083	296.623	296.191	297.289	297.445	298.539	297.951	297.778	297.293	296.984	296.726	286.407	296.53	296.577	296.152	296.832	296.88	286.344	297.535	297.116	297.803	289.98	297.836	297.851	298.354	297.696	297.766	297.663	298.706	298.64	298.484	298.389
	-21.75	296.634	296.495	296.672	296.507	296.263	296.111	296.412	295.987	296.398	294.76	296.952	296.84	297.075	297.581	297.868	294.542	297.589	297.065	297.098	297.734	298.023	298.692	298.233	298.107	297.927	297.393	297.603	296.014	297.544	296.981	296.553	297.183	297.335	296.692	297.782	298.096	298.117	297.196	298.016	297.853	298.4	297.857	297.966	297.66	298.699	298.489	298.601	298.041
	-22.5	295.988	295.899	296.062	295.861	295.475	295.442	295.732	295.324	295.749	295.816	296.354	296.235	296.515	297.06	297.336	295.77	297.074	296.382	296.603	296.89	297.528	297.914	297.609	297.581	297.468	296.842	297.221	296.238	297.281	296.451	295.988	296.631	296.82	297.006	297.173	297.733	297.518	297.278	297.53	297.41	298.046	297.507	297.593	297.257	298.417	298.061	298.45	297.528
	-23.25	295.803	295.602	295.774	295.671	295.405	295.155	295.47	293.204	295.498	293.435	296.241	295.948	296.233	296.728	296.998	297.982	296.766	296.21	295.031	296.609	296.557	297.699	297.348	297.246	297.012	296.313	295.667	292.315	295.652	296.003	295.733	296.255	296.395	297.359	296.882	295.165	297.308	297.611	297.068	296.817	297.519	297.075	297.115	296.171	297.753	297.756	297.759	297.808
	-24	297.351	297.117	297.342	297.15	296.696	296.65	296.898	296.548	296.874	296.478	297.351	297.148	297.438	298.056	298.127	298.539	297.755	296.922	297.101	297.903	297.97	298.625	297.875	297.719	297.673	297.053	297.456	297.163	297.297	296.364	295.922	296.602	296.718	297.827	297.077	297.334	297.317	297.608	297.101	296.899	297.623	296.811	296.876	296.625	297.881	297.594	297.768	296.807
	-24.75	296.985	296.883	297.016	296.82	296.298	296.334	296.622	296.316	296.634	296.274	297.136	297.033	297.296	297.873	298.002	292.589	297.729	296.895	297.227	297.183	298.05	298.214	297.978	297.93	297.865	297.229	297.665	295.333	297.705	296.686	296.163	296.795	296.941	295.244	297.243	297.814	297.471	295.937	297.406	297.245	297.934	297.261	297.293	297.074	298.243	297.867	298.232	297.126
	-25.5	296.669	296.447	296.617	296.468	296.084	295.986	296.251	295.685	296.244	295.299	296.702	296.506	296.78	297.355	297.439	298.462	297.116	296.41	296.364	296.642	297.262	297.64	297.335	297.152	297.08	296.482	296.679	296.271	296.562	295.876	295.446	296.055	296.166	297.484	296.567	296.532	296.819	297.2	296.537	296.258	296.938	296.235	296.299	295.964	297.141	296.963	296.97	296.319
	-26.25	296.645	296.824	296.737	296.469	295.128	295.693	296.096	295.181	296.213	296.366	296.798	296.768	297.193	297.835	297.954	293.371	297.751	296.121	296.812	295.51	297.841	296.847	297.296	297.621	297.766	296.861	297.531	294.499	298.149	296.349	295.522	296.173	296.353	295.161	296.329	297.216	296.385	295.373	296.81	296.936	297.958	297.149	296.981	296.874	298.483	297.63	299.097	296.5
	-27	296.24	293.12	289.758	291.837	293.127	294.528	294.243	292.623	294.692	293.949	294.588	294.48	294.839	296.891	296.538	306.702	295.98	297.915	297.18	157.766	295.208	218.748	297.363	294.079	292.341	294.983	294.836	295.512	295.378	296.027	297.327	294.774	294.276	300.576	299.582	297.376	301.617	299.027	297.427	287.937	293.435	295.854	296.961	296.7	292.844	297.052	277.245	296.526
	-27.75	296.189	295.966	296.136	295.968	295.482	295.451	295.746	295.81	295.689	292.765	296.018	295.896	296.163	296.747	296.821	295.69	296.412	295.603	295.994	296.358	296.71	297.112	296.443	296.212	296.164	295.677	296.177	296.24	295.979	294.908	294.375	295.072	295.134	295.734	295.539	296.158	295.668	295.381	295.441	295.265	295.912	294.999	295.064	295.133	296.127	295.879	295.928	294.901
	-28.5	295.855	295.594	295.794	295.622	295.087	295.064	295.372	295.01	295.297	291.35	295.711	295.555	295.838	296.443	296.56	293.926	296.103	295.208	295.386	296.014	296.294	296.844	296.094	295.87	295.772	295.283	295.654	294.443	295.413	294.491	293.998	294.73	294.776	294.685	295.221	295.439	295.37	294.612	295.185	295.061	295.793	294.809	294.863	294.878	296.054	295.813	295.86	294.888
	-29.25	295.71	295.472	295.642	295.477	295.063	295.024	295.264	295.349	295.242	294.837	295.601	295.443	295.708	296.316	296.333	296.792	295.976	295.226	295.616	295.129	296.267	296.216	296.08	295.865	295.843	295.292	295.816	296.308	295.655	294.583	294.106	294.743	294.843	296.011	295.222	295.833	295.419	295.642	295.122	294.816	295.496	294.708	294.786	294.676	295.692	295.45	295.418	294.555
	-30	296.394	296.563	296.362	296.13	294.612	295.291	295.704	295.247	295.835	295.731	296.182	296.159	296.64	297.305	297.267	301.465	297.036	295.277	296.261	293.35	297.036	294.984	296.141	296.384	296.694	295.82	296.693	297.77	297.362	295.152	294.198	294.814	294.945	298.082	294.883	296.143	294.79	296.465	295.082	295.094	296.158	295.215	295.023	295.174	296.573	295.735	297.091	294.232
	-30.75	295.866	295.633	295.795	295.636	295.195	295.151	295.377	295.508	295.362	295.28	295.645	295.489	295.723	296.33	296.224	293.997	295.899	295.128	295.512	295.47	296.082	296.277	295.877	295.653	295.67	295.083	295.572	295.018	295.399	294.3	293.799	294.403	294.486	294.221	294.803	295.323	294.931	294.243	294.537	294.187	294.844	294.026	294.066	293.945	294.96	294.73	294.706	293.781
	-31.5	295.521	295.277	295.413	295.277	294.834	294.778	295.023	295.008	295.007	294.103	295.276	295.11	295.361	295.954	295.872	296.416	295.536	294.786	295.045	294.746	295.666	295.694	295.496	295.242	295.256	294.694	295.089	295.391	294.922	293.924	293.422	294.014	294.083	295.185	294.439	294.786	294.565	294.711	294.149	293.784	294.444	293.626	293.67	293.55	294.544	294.37	294.262	293.447
	-32.25	295.611	295.517	295.414	295.434	295.253	294.959	295.368	295.454	295.352	288.411	295.317	295.347	295.472	295.789	295.81	294.284	295.643	295.468	295.338	294.946	295.797	295.842	295.976	295.564	295.485	295.181	295.005	295.241	294.951	294.626	293.969	294.373	294.363	294.533	294.864	295.003	294.84	293.91	294.248	293.801	294.002	293.448	293.493	293.597	293.839	294.053	293.488	293.403
	-33	295.607	295.54	295.507	295.455	295.246	295.033	295.299	295.731	295.357	295.219	295.37	295.338	295.452	295.866	295.647	292.604	295.588	295.288	295.505	295.298	295.743	295.885	295.834	295.56	295.626	295.064	295.207	294.882	295.238	294.49	293.877	294.231	294.315	293.291	294.572	295.093	294.6	293.363	293.951	293.384	293.666	293.223	293.236	293.04	293.499	293.504	293.267	292.797
	-33.75	294.959	295.062	294.9	294.819	294.183	294.228	294.569	294.395	294.695	294.712	294.787	294.778	294.986	295.411	295.214	293.818	295.22	294.522	294.737	294.215	295.183	294.893	295.136	295.081	295.249	294.517	294.635	293.907	295.016	294.019	293.257	293.599	293.708	293.464	293.79	294.205	293.747	293.161	293.365	292.962	293.409	292.948	292.846	292.604	293.353	293.132	293.522	292.334
	-34.5	294.404	294.327	294.317	294.28	294.129	293.835	294.108	294.127	294.167	293.642	294.215	294.139	294.252	294.635	294.43	292.875	294.387	294.151	294.023	294.923	294.411	295.182	294.686	294.405	294.448	293.859	293.748	293.25	293.756	293.32	292.754	293.09	293.17	292.743	293.441	293.439	293.493	292.696	292.797	292.241	292.489	292.082	292.09	291.732	292.288	292.372	292.129	291.839
	-35.25	294.271	294.195	294.164	294.136	294.04	293.742	293.962	294.034	294.065	296.123	294.103	294	294.105	294.503	294.201	294.109	294.232	294.054	293.932	294.012	294.215	294.535	294.558	294.292	294.385	293.719	293.618	293.535	293.687	293.229	292.696	292.951	293.065	293.099	293.283	293.273	293.373	293.018	292.576	291.872	292.133	291.857	291.862	291.331	291.88	291.977	291.664	291.504
	-36	293.101	293.039	293.004	293	292.984	292.592	292.897	293.075	292.937	290.744	292.915	292.891	292.958	293.268	293.114	290.339	293.092	293.057	292.871	294.018	293.195	294.167	293.561	293.216	293.21	292.722	292.507	291.986	292.479	292.229	291.65	291.962	292.021	291.068	292.357	292.395	292.39	291.112	291.648	291.087	291.187	290.839	290.87	290.603	290.929	291.123	290.713	290.67
	-36.75	293.231	293.201	293.148	293.133	293.047	292.707	292.973	293.105	293.062	293.386	293.032	292.971	293.059	293.395	293.128	293.105	293.168	293.053	292.894	293.995	293.17	294.049	293.512	293.228	293.317	292.7	292.519	292.725	292.59	292.214	291.625	291.886	291.977	292.125	292.198	292.209	292.228	291.861	291.444	290.819	290.963	290.67	290.669	290.245	290.674	290.808	290.559	290.337
	-37.5	291.96	292.141	290.563	290.802	288.683	290.446	290.942	290.331	291.42	293.227	291.542	291.891	292.497	293.408	293.269	295.217	293.388	291.541	293.347	254.386	293.221	270.698	292.221	292.35	292.609	292.163	293.39	293.422	295.407	292.271	291.098	290.785	290.885	293.079	291.39	293.708	291.405	291.252	291.509	289.667	291.946	292.016	291.777	292.24	292.364	291.88	290.246	289.98
	-38.25	292.389	292.316	292.259	292.269	292.26	291.873	292.129	292.222	292.213	292.36	292.167	292.09	292.168	292.5	292.225	293.061	292.26	292.23	291.966	292.54	292.232	292.851	292.647	292.31	292.377	291.796	291.54	291.992	291.566	291.315	290.764	290.997	291.078	291.609	291.353	291.21	291.402	291.238	290.536	289.832	289.973	289.708	289.724	289.269	289.646	289.864	289.404	289.445
	-39	291.566	291.538	291.483	291.474	291.417	291.061	291.325	291.407	291.416	291.727	291.396	291.34	291.413	291.738	291.475	289.866	291.531	291.452	291.246	292.264	291.526	292.381	291.924	291.642	291.711	291.099	290.873	290.385	290.945	290.638	290.064	290.307	290.4	289.745	290.627	290.57	290.665	289.777	289.874	289.235	289.367	289.109	289.106	288.652	289.073	289.224	288.937	288.806
	-39.75	291.287	291.23	291.176	291.189	291.172	290.764	291.035	291.012	291.115	290.61	291.059	290.987	291.054	291.363	291.086	290.834	291.13	291.104	290.744	292.072	291.052	292.09	291.505	291.172	291.233	290.648	290.302	290.169	290.323	290.161	289.601	289.834	289.904	289.888	290.166	289.871	290.189	289.665	289.323	288.66	288.764	288.486	288.486	288.023	288.419	288.652	288.248	288.265
	-40.5	290.105	290.107	290.053	290.03	289.952	289.623	289.877	289.864	289.986	291.229	290.018	289.96	290.035	290.365	290.109	287.656	290.197	290.089	289.883	290.945	290.194	291.062	290.624	290.4	290.473	289.811	289.589	288.557	289.72	289.4	288.834	289.067	289.184	288.05	289.37	289.309	289.435	288.329	288.695	288.073	288.225	288.019	288.005	287.469	287.961	288.062	287.896	287.696
	-41.25	288.494	288.511	288.462	288.433	288.436	288.087	288.357	288.628	288.45	289.112	288.499	288.481	288.557	288.861	288.728	287.439	288.795	288.786	288.738	289.562	289.008	289.777	289.409	289.175	289.208	288.627	288.521	288.585	288.646	288.288	287.72	287.986	288.118	287.731	288.361	288.684	288.469	287.781	287.818	287.251	287.339	287.176	287.212	286.791	287.134	287.224	287.039	286.876
	-42	286.572	286.567	286.542	286.515	286.553	286.176	286.457	286.387	286.543	286.703	286.685	286.63	286.737	287.035	287.004	288.612	287.043	287.056	286.795	287.777	287.239	288.098	287.754	287.524	287.511	286.941	286.712	287.345	286.826	286.668	286.156	286.442	286.582	287.633	286.884	286.919	287.063	287.324	286.467	285.941	286.059	285.922	285.981	285.468	285.907	286.028	285.826	285.815
	-42.75	284.992	284.986	284.98	284.931	284.969	284.63	284.913	284.953	284.987	285.062	285.199	285.164	285.281	285.596	285.658	286.052	285.663	285.654	285.543	286.003	286.005	286.592	286.471	286.266	286.211	285.678	285.584	286.03	285.697	285.443	284.946	285.276	285.432	286.044	285.768	286.073	285.995	285.948	285.518	285.048	285.202	285.063	285.149	284.703	285.143	285.201	285.031	284.975
	-43.5	283.517	283.567	283.384	283.438	283.413	283.027	283.618	283.577	283.547	270.081	283.604	283.803	283.924	284.036	284.588	283.608	284.402	284.546	284.266	284.305	284.966	285.289	285.342	284.94	284.639	284.635	284.238	285.303	284.284	284.43	283.719	284.185	284.166	285.21	284.894	285.288	284.937	284.207	284.738	284.63	284.565	284.173	284.304	284.722	284.573	284.872	284.356	284.543
	-44.25	282.333	282.364	282.363	282.299	282.367	282.036	282.339	282.279	282.413	282.267	282.731	282.717	282.847	283.143	283.351	283.488	283.359	283.382	283.271	283.639	283.832	284.381	284.364	284.215	284.103	283.589	283.502	283.797	283.671	283.48	283.003	283.357	283.543	284.131	283.911	284.317	284.212	284.167	283.887	283.504	283.652	283.592	283.704	283.238	283.692	283.707	283.638	283.6
	-45	281.494	281.532	281.324	281.29	281.013	281.017	281.345	280.979	281.476	281.743	281.861	281.878	282.099	282.508	282.726	282.993	282.725	282.417	282.524	276.93	283.103	280.158	283.444	283.37	283.278	282.763	282.859	282.679	283.302	282.719	282.181	282.463	282.649	283.437	283.057	283.626	283.369	283.323	283.187	282.628	283.163	283.121	283.187	282.798	283.331	283.237	282.98	282.922
	-45.75	280.34	280.706	280.46	280.261	279.346	279.76	280.183	280.209	280.357	281.378	280.807	280.958	281.289	281.714	282.023	280.86	282.046	281.076	282.06	279.107	282.656	280.846	282.33	282.645	282.755	282.025	282.745	282.882	283.592	281.962	281.097	281.562	281.817	282.257	281.837	283.726	281.979	281.977	282.43	282.445	283.034	282.78	282.718	282.689	283.486	282.769	284.026	281.977
	-46.5	280.294	280.238	280.317	280.253	280.479	280.054	280.312	280.426	280.355	280.545	280.675	280.627	280.73	281.04	281.236	281.119	281.199	281.34	281.214	281.898	281.729	282.553	282.306	282.081	281.929	281.465	281.406	281.851	281.41	281.309	280.919	281.295	281.475	281.931	281.905	282.292	282.251	282.109	281.833	281.401	281.519	281.442	281.6	281.118	281.537	281.62	281.334	281.55
	-47.25	279.904	279.819	279.913	279.843	280.042	279.639	279.882	279.989	279.919	280.294	280.246	280.187	280.288	280.627	280.79	279.189	280.732	280.819	280.72	281.143	281.231	281.916	281.774	281.544	281.39	280.922	280.898	280.719	280.87	280.718	280.343	280.727	280.9	280.633	281.33	281.69	281.671	281.056	281.239	280.787	280.957	280.835	280.987	280.511	280.98	281.05	280.727	280.933
	-48	279.193	279.184	279.166	279.127	279.187	278.847	279.207	279.118	279.229	275.674	279.517	279.541	279.67	279.943	280.253	279.264	280.174	280.212	280.056	279.992	280.679	281.001	281.168	280.94	280.75	280.391	280.254	280.357	280.335	280.239	279.747	280.149	280.278	280.609	280.772	281.135	281.035	280.559	280.751	280.432	280.575	280.402	280.532	280.294	280.637	280.726	280.459	280.562
	-48.75	278.635	278.584	278.604	278.543	278.646	278.339	278.593	278.614	278.657	279.318	279	278.966	279.083	279.437	279.603	277.195	279.575	279.586	279.552	278.403	280.054	279.811	280.567	280.381	280.237	279.755	279.765	279.13	279.856	279.605	279.199	279.545	279.725	279.07	280.142	280.575	280.481	279.601	280.105	279.613	279.863	279.788	279.919	279.447	279.918	279.947	279.628	279.802
	-49.5	278.287	278.197	278.293	278.247	278.524	278.042	278.286	278.108	278.331	278.54	278.664	278.575	278.667	278.97	279.133	279.098	279.106	279.294	278.912	279.969	279.503	280.559	280.219	279.97	279.801	279.32	279.076	278.97	279.04	279.164	278.826	279.171	279.342	279.702	279.786	279.74	280.147	279.975	279.646	279.167	279.286	279.231	279.382	278.767	279.258	279.418	279.031	279.46
	-50.25	277.784	277.761	277.786	277.735	277.874	277.501	277.775	277.605	277.842	277.966	278.173	278.126	278.242	278.547	278.73	278.607	278.727	278.804	278.565	278.764	279.142	279.639	279.757	279.572	279.435	278.935	278.773	278.705	278.873	278.817	278.407	278.741	278.92	279.302	279.321	279.493	279.651	279.483	279.255	278.811	278.976	278.93	279.053	278.511	278.991	279.068	278.836	279.03
	-51	276.992	277.093	277.062	276.945	276.827	276.69	276.99	277.409	277.075	277.941	277.408	277.463	277.62	277.961	278.194	276.12	278.189	278.004	278.454	277.629	278.867	278.672	279.077	279.034	278.972	278.45	278.787	279.109	279.074	278.337	277.776	278.179	278.392	278.103	278.673	279.915	278.946	278.359	278.837	278.551	278.783	278.674	278.772	278.525	278.951	278.738	278.963	278.382
	-51.75	276.543	276.568	276.582	276.518	276.656	276.302	276.582	276.66	276.654	277.03	276.97	276.964	277.071	277.358	277.565	276.704	277.585	277.679	277.619	277.906	278.116	278.657	278.668	278.514	278.389	277.896	277.846	277.971	277.99	277.812	277.365	277.705	277.899	277.973	278.268	278.776	278.589	278.232	278.255	277.853	277.967	277.954	278.081	277.609	278.004	278.026	277.908	277.956
	-52.5	275.842	275.683	276.186	275.992	276.902	276.262	276.34	275.987	276.021	267.358	277.024	277.982	276.41	276.853	276.433	28.5022	276.853	277.342	277.387	275.59	277.496	279.14	279.851	279.925	277.947	277.903	277.129	182.516	276.084	277.38	277.467	277.659	277.577	157.304	278.119	277.311	278.176	198.454	277.83	277.153	277.294	277.273	276.938	276.532	277.395	277.357	275.403	278.171
	-53.25	275.176	275.199	275.213	275.165	275.408	274.989	275.261	275.363	275.339	275.935	275.641	275.632	275.723	275.98	276.197	276.536	276.245	276.467	276.325	276.692	276.796	277.418	277.447	277.268	277.13	276.653	276.53	277.141	276.665	276.621	276.202	276.51	276.711	277.301	277.102	277.548	277.449	277.438	277.062	276.617	276.665	276.733	276.88	276.35	276.666	276.753	276.537	276.783
	-54	274.302	274.345	274.355	274.308	274.567	274.137	274.424	274.37	274.504	274.8	274.853	274.849	274.942	275.18	275.456	275.569	275.517	275.765	275.534	276.047	276.08	276.788	276.806	276.651	276.484	276.008	275.813	276.12	275.978	276.039	275.63	275.936	276.146	276.634	276.55	276.903	276.926	276.858	276.589	276.179	276.215	276.328	276.478	275.905	276.243	276.333	276.158	276.453
	-54.75	273.508	273.576	273.582	273.514	273.729	273.356	273.656	273.742	273.733	273.906	274.119	274.141	274.255	274.501	274.854	275.196	274.892	275.09	275.039	275.173	275.582	276.059	276.215	276.095	275.92	275.466	275.415	276.141	275.618	275.527	275.095	275.44	275.665	276.41	276.073	276.744	276.467	276.55	276.251	275.909	275.969	276.072	276.236	275.754	276.076	276.088	276.019	276.154
	-55.5	273.176	273.261	273.276	273.204	273.444	273.049	273.347	273.415	273.426	273.759	273.819	273.849	273.944	274.177	274.524	273.108	274.586	274.812	274.732	275.313	275.276	276.022	275.955	275.85	275.667	275.198	275.111	275.123	275.319	275.276	274.848	275.184	275.415	275.259	275.804	276.44	276.198	275.726	275.982	275.652	275.678	275.808	275.966	275.449	275.776	275.787	275.76	275.899
	-56.25	272.339	272.328	272.411	272.368	272.878	272.308	272.57	272.779	272.619	272.897	272.992	272.98	273.044	273.253	273.624	275.196	273.657	274.15	273.908	274.846	274.414	275.484	275.254	275.024	274.785	274.401	274.22	275.601	274.251	274.489	274.169	274.497	274.722	275.98	275.227	275.714	275.695	276.096	275.32	274.895	274.819	275.007	275.24	274.661	274.851	275.03	274.642	275.288
	-57	272.221	272.287	272.278	272.24	272.486	272.045	272.428	272.356	272.456	268.664	272.815	272.877	272.988	273.165	273.663	274.394	273.641	273.921	273.679	274.526	274.352	275.239	275.035	274.846	274.589	274.277	274.044	274.991	274.182	274.344	273.885	274.275	274.449	275.646	274.977	275.458	275.334	275.469	275.169	274.947	274.918	274.947	275.129	274.826	275.028	275.145	274.975	275.255
	-57.75	271.95	271.954	272.044	271.985	272.459	271.919	272.179	272.492	272.226	272.619	272.599	272.606	272.661	272.879	273.238	272.378	273.271	273.717	273.588	274.624	274.061	275.187	274.842	274.635	274.399	274.008	273.906	274.541	273.941	274.075	273.736	274.081	274.307	274.413	274.784	275.421	275.233	274.893	274.896	274.502	274.432	274.594	274.816	274.284	274.483	274.611	274.301	274.815
	-58.5	271.863	271.891	271.945	271.895	272.279	271.776	272.058	272.045	272.121	272.171	272.514	272.511	272.586	272.801	273.155	272.711	273.205	273.574	273.298	274.288	273.871	274.915	274.688	274.516	274.292	273.861	273.641	273.866	273.746	273.945	273.587	273.911	274.133	274.391	274.587	274.954	275.018	274.796	274.704	274.325	274.301	274.461	274.649	274.057	274.353	274.475	274.245	274.707
	-59.25	271.644	271.61	271.714	271.668	272.154	271.581	271.841	271.828	271.883	271.885	272.285	272.249	272.314	272.536	272.892	273.14	272.908	273.354	272.988	274.245	273.576	274.827	274.454	274.226	273.971	273.571	273.311	273.775	273.31	273.628	273.331	273.669	273.883	274.466	274.39	274.621	274.856	274.829	274.473	274.06	274.024	274.17	274.388	273.761	274.058	274.245	273.857	274.525
	-60	271.34	271.447	271.488	271.397	271.618	271.226	271.529	271.594	271.605	271.99	272.021	272.048	272.154	272.379	272.756	272.212	272.812	273.009	272.951	274.37	273.532	274.727	274.184	274.11	273.937	273.45	273.39	273.748	273.603	273.535	273.1	273.467	273.707	273.998	274.068	274.758	274.465	274.335	274.31	274.061	274.067	274.18	274.337	273.824	274.196	274.161	274.293	274.275
	-60.75	271.418	271.413	271.477	271.448	271.954	271.373	271.64	271.681	271.7	271.92	272.066	272.043	272.109	272.305	272.659	274.956	272.713	273.218	272.851	273.83	273.391	274.469	274.292	274.063	273.83	273.429	273.145	274.486	273.2	273.535	273.217	273.517	273.738	275.274	274.236	274.52	274.698	275.296	274.293	273.846	273.767	273.981	274.201	273.561	273.771	273.983	273.58	274.292
	-61.5	271.059	271.171	271.19	271.114	271.401	270.988	271.266	271.37	271.364	272.853	271.769	271.801	271.879	272.098	272.428	270.402	272.54	272.821	272.746	273.54	273.252	274.133	273.99	273.917	273.743	273.236	273.144	272.906	273.388	273.369	272.955	273.261	273.516	272.948	273.865	274.536	274.281	273.636	274.059	273.71	273.698	273.915	274.072	273.467	273.786	273.785	273.814	273.97
	-62.25	271.132	271.255	271.214	271.163	271.368	270.988	271.31	271.237	271.407	271.348	271.777	271.819	271.922	272.126	272.479	272.525	272.577	272.812	272.645	272.955	273.208	273.758	273.922	273.831	273.664	273.19	273.009	273.365	273.296	273.317	272.86	273.156	273.383	273.901	273.761	274.286	274.134	274.089	273.923	273.584	273.595	273.772	273.912	273.378	273.672	273.706	273.698	273.854
	-63	271.056	271.154	271.128	271.093	271.35	270.91	271.225	270.884	271.323	271.232	271.704	271.713	271.803	271.996	272.322	272.268	272.433	272.72	272.312	273.096	272.949	273.788	273.8	273.688	273.504	273.01	272.651	272.446	272.904	273.141	272.726	272.994	273.215	273.559	273.605	273.734	273.991	273.861	273.702	273.325	273.325	273.527	273.66	273.001	273.357	273.464	273.374	273.721
	-63.75	270.628	270.704	270.711	270.661	270.966	270.518	270.807	270.828	270.893	271.396	271.248	271.262	271.346	271.555	271.869	272.286	271.956	272.27	272.066	272.805	272.589	273.431	273.345	273.209	273.037	272.569	272.38	272.96	272.576	272.663	272.255	272.55	272.776	273.404	273.169	273.632	273.562	273.615	273.261	272.876	272.856	273.034	273.195	272.615	272.893	272.976	272.855	273.154
	-64.5	270.65	270.688	270.722	270.679	271.067	270.565	270.842	271.051	270.908	271.131	271.226	271.239	271.304	271.508	271.813	272.23	271.877	272.27	272.096	273.005	272.557	273.543	273.309	273.116	272.929	272.509	272.345	273.265	272.454	272.566	272.179	272.485	272.698	273.359	273.129	273.66	273.521	273.544	273.16	272.75	272.685	272.843	273.028	272.498	272.693	272.824	272.572	272.988
	-65.25	270.714	270.798	270.791	270.731	270.937	270.557	270.856	270.9	270.94	271.214	271.294	271.319	271.419	271.651	271.958	271.594	272.025	272.228	272.13	272.54	272.652	273.272	273.304	273.189	273.033	272.56	272.454	272.801	272.673	272.616	272.176	272.493	272.712	273.033	273.087	273.662	273.451	273.282	273.201	272.848	272.883	272.998	273.142	272.636	272.952	272.977	272.93	273.054
	-66	270.775	270.822	270.852	270.776	270.927	270.574	270.845	270.827	270.925	271.883	271.29	271.279	271.384	271.66	271.893	270.579	271.935	272.035	271.94	272.59	272.476	273.221	273.077	272.968	272.834	272.317	272.246	272.003	272.419	272.288	271.867	272.201	272.414	272.212	272.755	273.221	273.105	272.654	272.824	272.461	272.566	272.603	272.728	272.186	272.631	272.624	272.608	272.634
	-66.75	271.281	271.35	271.335	271.266	271.306	271.007	271.285	271.318	271.378	272.246	271.656	271.659	271.764	272.045	272.178	270.387	272.238	272.244	272.213	272.743	272.675	273.291	273.171	273.065	272.994	272.448	272.396	272.014	272.61	272.345	271.859	272.169	272.36	271.883	272.64	273.124	272.902	272.255	272.575	272.189	272.31	272.288	272.369	271.887	272.321	272.295	272.334	272.175
	-67.5	271.544	271.533	271.524	271.491	271.59	271.22	271.458	271.665	271.542	272.671	271.663	271.625	271.7	271.991	271.933	271.453	271.986	272.053	271.955	272.597	272.261	272.961	272.731	272.508	272.494	271.958	271.85	272.101	271.938	271.701	271.23	271.491	271.637	271.632	271.914	272.191	272.098	271.717	271.507	270.963	271.051	270.959	271.03	270.553	270.899	271	270.759	270.783
	-68.25	271.692	271.607	271.591	271.575	271.505	271.184	271.395	271.541	271.47	272.429	271.434	271.342	271.419	271.768	271.447	270.87	271.459	271.324	271.176	272.047	271.402	272.155	271.698	271.404	271.496	270.911	270.773	270.676	270.765	270.385	269.877	270.12	270.196	270	270.401	270.323	270.428	269.892	269.623	268.983	269.166	268.845	268.843	268.42	268.873	269.011	268.678	268.53
	-69	271.439	271.247	271.196	271.242	271.309	270.91	271.098	271.771	271.145	271.206	270.901	270.812	270.861	271.207	270.778	273.853	270.746	270.785	270.739	270.143	270.698	270.682	270.903	270.414	270.529	270.089	270.011	272.225	269.849	269.44	268.935	269.135	269.151	270.78	269.465	269.552	269.431	269.854	268.364	267.517	267.64	267.267	267.31	267.077	267.195	267.52	266.641	266.886
	-69.75	268.523	268.156	268.243	268.299	268.721	268.135	268.216	269.211	268.222	269.901	268.001	267.841	267.83	268.212	267.748	270.021	267.661	267.98	267.888	267.048	267.729	267.793	268.095	267.46	267.49	267.131	267.093	269.379	266.646	266.444	266.136	266.335	266.358	267.495	266.802	266.835	266.896	267.011	265.615	264.587	264.671	264.351	264.493	264.144	264.175	264.653	263.253	264.155
[truncated: 152 more columns]
