# Supplementary material for: Temperature Field Data Reconstruction Using the Sparse Low-Rank Matrix Completion Method
Source: Hindawi journal article supplement (doi:10.1155/2019/3676182), 2019-11-03
Supplement: f1 [file 3676182.f1.zip › data/ERA Interim/Tabel original.xlsx]

## Sheet: Sheet1
		24.75	25.5	26.25	27	27.75	28.5	29.25	30	30.75	31.5	32.25	33	33.75	34.5	35.25	36	36.75	37.5	38.25	39	39.75	40.5	41.25	42	42.75	43.5	44.25	45	45.75	46.5	47.25	48	48.75	49.5	50.25	51	51.75	52.5	53.25	54	54.75	55.5	56.25	57	57.75	58.5	59.25	60
	79.5	254.7	255.3	257.6	257.8	257.8	257.8	257.8	257.8	257.8	257.7	257.6	257.5	257.6	257.7	257.8	257.9	257.8	257.4	257	256.6	256	255.4	254.7	254	253.3	252.6	251.9	251.1	250.5	249.9	249.4	249	248.6	248.1	247.8	247.6	247.3	247	246.8	246.5	246.4	246.3	246.2	246.1	246.1	246.2	246.2	246.2
	78.75	257.7	257.4	257.2	256.9	257	257.1	257.2	257.3	257.5	257.7	258	258.2	258.6	259	259.4	259.8	259.5	259.2	258.9	258.6	258.3	257.9	257.6	257.3	256.5	255.7	254.9	254.2	253.7	253.3	252.9	252.5	252.2	251.9	251.5	251.2	250.4	249.6	248.8	247.9	247.8	247.7	247.6	247.5	248.1	248.7	249.3	249.9
	78	261.3	260.8	260.3	259.8	259.9	260.1	260.3	260.4	260.7	260.9	261.1	261.3	261.5	261.8	262	262.1	261.8	261.4	261	260.6	260.9	261.2	261.6	261.9	261.5	261.1	260.6	260.2	259.7	259.1	258.6	258.1	257.5	256.9	256.3	255.7	255	254.4	253.8	253.2	253.5	253.7	253.9	254.1	255	255.8	256.6	257.5
	77.25	265.5	265.2	265.2	265.3	265.5	265.6	265.7	265.7	265.8	265.8	265.8	265.7	265.6	265.5	265.3	265.1	264.9	264.6	264.3	264	263.7	263.5	263.3	263	262.8	262.6	262.4	262.2	261.9	261.6	261.3	261.1	260.8	260.6	260.5	260.3	260.2	260.3	260.3	260.5	260.6	260.6	260.7	260.8	260.8	261	261.1	261.1
	76.5	267	266.9	266.9	266.9	266.9	266.9	266.9	266.9	266.9	266.9	266.8	266.7	266.5	266.3	266.1	265.8	265.6	265.3	265	264.7	264.4	264.2	264	263.9	263.7	263.6	263.5	263.4	263.3	263.1	263	262.9	262.9	262.9	262.8	262.8	262.8	262.8	262.8	262.9	263	263	263	263	262.8	262.2	261.6	260.9
	75.75	267.9	267.8	267.7	267.7	267.7	267.9	268.2	268.4	268.2	268	267.9	267.5	267	266.6	266.2	266	265.8	265.6	265.4	265.1	264.8	264.8	264.7	264.7	264.7	264.6	264.6	264.6	264.6	264.6	264.6	264.7	264.7	264.7	264.7	264.6	264.6	264.5	264.4	264.3	264.2	263.7	263	262.3	261.6	261	257.2	256.6
	75	269.1	269.3	269.5	269.4	269.4	269.5	269.5	269.5	269.3	269	268.7	268.3	267.9	267.4	266.9	266.6	266.4	266.1	265.9	265.8	265.7	265.6	265.7	265.7	265.7	265.7	265.8	265.8	265.9	266.1	266.2	266.3	266.1	265.9	265.7	265.6	265.5	265.5	264.8	263.9	263	262.1	261.3	255.2	254.4	253.7	253.2	252.8
	74.25	270.9	270.8	270.8	270.6	270.5	270.3	270.1	269.9	269.8	269.6	269.3	269.1	268.8	268.6	268.3	268	267.7	267.4	267.1	267	267	266.9	266.9	266.9	267	267	267.1	267.1	267.2	267.2	267.2	267	266.7	266.3	266	265.7	265.4	264.2	262.7	261.1	260.4	254.1	253.3	253.1	252.8	250.3	249.8	249.2
	73.5	272.1	271.9	271.8	271.7	271.5	271.2	271	270.9	270.7	270.6	270.3	270.1	269.8	269.6	269.4	269.2	269.1	269	268.8	268.6	268.4	268.2	268.2	268.2	268.1	268.1	268.1	268.1	267.7	267.3	267	266.6	266.3	266	265	263.9	262.9	261.8	260	256.2	249.3	248	246.8	246.9	247.2	247.3	247.4	247.5
	72.75	272.9	272.8	272.6	272.4	272.2	272	271.8	271.6	271.5	271.3	271.1	270.9	270.7	270.5	270.3	270.1	270	269.8	269.7	269.6	269.6	269.4	269.3	269.2	269	268.8	268.6	268.3	267.9	267.3	266.6	265.9	265.3	264.7	263.4	261.2	258.9	257.5	249.5	248.4	248	247.2	246.4	246.4	246.5	246.1	245.5	244.9
	72	272.8	272.7	272.6	272.6	272.6	272.5	272.4	272.3	272.1	271.9	271.7	271.5	271.2	271	270.8	270.6	270.4	270.2	270	270	269.9	269.8	269.6	269.4	269	268.6	268.3	267.9	267.6	266.8	265.8	264.8	263.4	262.1	260.8	259.1	249.1	247.1	244.8	242.7	243	243.8	245.6	246	246.3	246.1	245.6	245.1
	71.25	271.7	271.5	271.4	271.4	271.4	271.4	271.4	271.4	271.6	271.7	271.8	271.6	271.4	271.3	271	270.8	270.7	270.5	270.4	270.2	269.9	269.7	269.5	269.3	268.9	268.5	268	267.5	267	266.1	264.9	263.7	262.8	261.9	260.6	258.5	256.3	254.9	246	244.8	244.1	243.3	242.9	246	246.6	246.8	247	247.2
	70.5	270	269.8	269.5	269.1	268.7	268.6	268.6	268.6	270.5	271.1	271.3	271.5	271.6	271.3	271	270.7	270.6	270.5	270.2	270	269.8	269.6	269.5	269.1	268.8	268.3	267.8	267.2	266.7	266.3	265.4	264.1	262.8	262.1	261.5	260.7	259.8	258.8	257.4	255.9	254.5	253.1	251.7	251.2	250.7	250.2	249.6	249
	69.75	268.2	268	267.8	267.8	267.7	267.7	267.7	267.4	269.1	268.5	269.8	269.8	270.7	270.6	270.5	270.4	270.4	270.3	270	269.8	269.5	269.4	269.2	268.8	268.5	268.1	267.6	267.2	265.8	264.4	263.3	262.2	261.1	260.9	260.8	260.4	259.8	259.1	257.6	256	255.1	254.5	253.9	253.5	253.1	252.8	252.3	250.5
	69	268.5	268.5	268.4	268.4	268.3	268.2	268.1	268	267.9	267.8	267.6	267.7	267.7	267.7	267.5	267	267	269.4	269.5	269.3	269.1	268.9	268.7	268.3	267.6	266.7	265.5	264.2	263.1	262.2	261.3	259.8	253.3	254.2	258.9	258.9	258.7	258	256.4	254.7	254.1	253.7	253.4	253.1	252.7	251	251.4	250.8
	68.25	269.9	269.7	269.6	269.4	269.1	268.8	268.3	267.8	267.4	267	266.7	266.4	266	265.6	265.2	264.9	264.6	265.5	266.4	267.3	267.5	267.7	267.9	267.1	265	263.2	255.4	254.1	255.2	261.6	261.2	260.6	259.7	258.3	257	252.5	252.5	252.1	251.7	251.6	252.4	250.9	250.5	250.3	250.1	249.9	250	250.2
	67.5	270.8	270.7	270.6	270.4	269.9	269.4	268.8	268.2	267.7	267.2	266.7	266.3	265.8	265.3	264.8	264.3	263.8	263.4	263	262.3	261.5	261.7	265.8	265.4	263.8	262.4	255.8	254.7	259.1	260.1	259.7	253.6	251.4	250.1	249.6	249.8	249.9	250.1	250.3	250.3	250.4	250.3	250.1	250.1	250.3	250.6	251	251.4
	66.75	270.9	271.1	271.2	271.1	270.8	270.4	270	269.6	269.2	268.8	268.4	268	267.8	267	266	265.2	264.5	264	263.7	263.2	262.5	262.4	263.7	263.3	262.5	261.5	260.2	256	256	256.1	253.4	251.5	250.8	250.6	250.5	250.4	250.3	250.1	250.1	250.1	250.2	250.3	250.4	250.7	251.3	251.9	252.6	253.4
	66	272	272.2	272	271.8	271.6	271.4	271.1	270.9	270.8	270.7	270.5	270.4	270.3	270.4	269.4	269	268.1	268	267.6	266.4	265.5	264.3	262.7	261	260	259.1	258.1	257.2	256.4	255.6	254.5	253.4	252.6	251.7	251.3	250.9	250.7	250.4	250.5	250.7	250.8	250.8	251.1	251.6	252.3	253.1	253.9	255
	65.25	274.1	273.6	273.2	272.8	272.6	272.3	272.1	271.9	271.8	271.7	271.7	271.6	271.5	271.5	271.4	271.4	270.8	269.8	269	268.6	268.1	265.5	264.1	262.8	261.9	261	260.3	259.6	258.7	257.8	257	256.1	255.4	254.7	254	253.4	253.2	252.9	252.9	252.9	252.7	252.5	253	253.5	254.5	255.5	255.6	255.8
	64.5	274.7	274.4	274.1	274	273.5	273.4	273.3	273.1	273	272.9	272.7	272.6	272.6	272.6	272.2	272.1	271.9	271.3	271.5	271.7	270.3	269.4	268.4	267.5	266.6	265.7	264.9	264.2	263.5	262.7	262.2	261.6	261	260.4	259.8	259.2	258.7	258.3	258	257.6	257.2	256.9	257.5	258.1	259.2	260.4	261	261.5
	63.75	275.2	274.8	274.6	274.7	274.4	274.2	274.1	274	273.9	273.8	273.7	273.6	273.5	273.6	273.1	273	272.9	272.8	272.6	272.5	272.3	272	271.7	271.3	270.8	270.2	269.7	269.2	268.7	268.3	268	267.7	267.4	267	266.7	266.3	265.8	265.3	264.8	264.4	264.1	263.8	264	264.5	265.3	266.1	266.9	268.1
	63	275.8	275.7	275.4	275.3	275.2	275	274.8	274.6	274.4	274.2	274.2	274.2	274.2	274.1	273.7	273.4	273.2	273	273	272.9	272.8	272.8	272.8	272.8	272.7	272.5	272.3	272.1	271.9	271.8	271.7	271.6	271.5	271.4	271.3	271.1	270.9	270.6	270.2	270	269.8	269.8	269.7	269.5	269.4	269.4	269.6	270.5
	62.25	276.3	276.4	276.3	276.1	275.9	275.6	275.5	275.3	274.9	274.7	274.4	274.4	274.3	274.2	274.1	273.9	273.6	273.4	273.2	273.2	273	272.8	272.9	272.9	273.1	273.2	273.2	273.2	273.2	273.1	273.1	273.1	273.1	273.1	273.1	273.1	272.9	272.8	272.6	272.4	272.3	272.1	271.9	271.4	270.9	270.5	270.4	270.9
	61.5	277.1	277.1	277	276.9	276.9	276.7	276.6	276.2	275.3	275.1	274.6	274.4	274.2	274.1	274.1	273.9	273.7	273.7	273.6	273.5	273.3	273	272.8	272.9	273.1	273.2	273.4	273.4	273.5	273.6	273.6	273.5	273.5	273.5	273.5	273.4	273.2	273.1	273.1	273.1	273	272.8	272.5	271.8	271.1	270.4	270.3	270.5
	60.75	277.6	277.5	277.4	277.2	277.1	276.8	276.6	276.3	275.3	274.9	274.6	274.2	274	273.7	273.7	273.7	273.9	274	274	273.8	273.5	273.2	272.9	273	273	273.2	273.3	273.4	273.5	273.6	273.6	273.6	273.5	273.4	273.4	273.3	273.3	273.2	273.2	273.2	273.2	273	272.7	272	271.3	270.5	270.5	270.8
	60	277.7	277.6	277.5	277.2	276.9	276.4	275.9	275.4	275.1	274.9	274.5	274.1	273.5	273.3	273.2	273.4	273.7	274	274	274	273.8	273.5	273.3	273.1	273	273	273.1	273.1	273.2	273.3	273.3	273.3	273.2	273.2	273.2	273.2	273.1	273.1	273.2	273.4	273.5	273.4	273.3	272.3	271.4	270.5	270.5	271
	59.25	276.7	276.2	275.8	275.5	275.1	274.6	274.2	273.9	273.9	273.7	273.4	273.1	272.7	272.8	273	273.5	273.8	274	273.9	273.9	273.7	273.6	273.4	273.2	273	272.9	273	273.1	273.3	273.4	273.4	273.4	273.3	273.3	273.2	273.2	273.1	273	273	273.1	273.3	273.3	273.3	272.3	271.5	270.7	270.8	271.4
	58.5	274.9	274.3	273.7	273.4	272.8	272.8	272.8	272.8	272.8	272.7	272.3	272.1	272.1	272.6	273.2	273.6	273.9	274.1	274.1	274	273.9	273.7	273.5	273.3	273.2	273.2	273.3	273.3	273.5	273.6	273.7	273.7	273.6	273.4	273.3	273.2	273.1	272.9	272.9	273	273.1	273.1	272.9	272.2	271.5	270.8	270.9	271.2
	57.75	273	272.6	272	271.8	271.7	271.6	271.7	271.8	272.1	272.2	272.2	272.2	272.3	272.7	273.1	273.6	273.9	274.1	274.2	274.1	274	273.8	273.6	273.4	273.4	273.4	273.6	273.7	273.8	273.9	273.9	273.9	273.6	273.4	273.3	273.2	273.1	273.1	273	273	272.8	272.5	272	271.4	270.8	270.3	270.2	270.4
	57	271.7	271.3	270.9	270.9	271.1	271.1	271.2	271.4	271.8	272.2	272.2	272.2	272.4	272.6	273	273.6	273.9	274.1	274.2	274.1	274	273.8	273.7	273.6	273.6	273.6	273.7	273.8	274	274	274	273.8	273.6	273.5	273.6	273.5	273.4	273.2	273	272.8	272.3	271.5	270.7	269.9	269.3	268.9	268.9	269.1
	56.25	271.6	271.5	271.4	271.3	271.5	271.6	271.6	272.1	272.4	272.6	272.5	272.7	273.2	273.4	273.5	273.7	273.9	274.1	274.2	274.1	274.1	273.9	273.8	273.8	273.7	273.7	273.8	274	274.1	274.2	274.2	274.1	273.9	273.7	273.5	273.4	273.3	273	272.7	272.5	271.7	270.7	269.4	268.4	267.6	267.2	267.3	267.7
	55.5	271.8	271.7	271.6	271.4	271.6	271.7	271.9	272.4	272.6	272.6	272.5	272.6	272.9	272.9	273.1	273.5	273.9	274.2	274.4	274.3	274.1	274	273.9	273.8	273.7	273.8	273.9	274	274	274.1	274.1	274	273.9	273.8	273.5	273.2	272.8	272.5	272.2	271.8	270.9	269.7	268.2	266.9	266	265.4	265.8	266.4
	54.75	272	271.7	271.5	271.3	271.5	271.8	272	272.1	271.9	271.4	271.2	271.1	271.4	271.7	272.2	273.1	273.6	273.9	274.2	274.1	274	273.9	273.8	273.8	273.8	273.8	273.8	273.8	273.9	274	274	274.1	274	273.8	273.4	272.9	272.4	271.8	271.3	270.8	269.7	268.4	266.9	265.4	264.4	264	264.8	265.7
	54	272.2	271.8	271.6	271.5	271.8	272.1	272.3	272	271.7	271.1	270.7	271.2	271.6	272.1	272.7	273.2	273.6	273.7	273.7	273.7	273.6	273.6	273.5	273.5	273.6	273.6	273.6	273.7	273.7	273.6	273.6	273.6	273.7	273.4	273.1	272.6	272	271.3	270.6	269.5	268.2	266.7	265.3	264	263.2	263.5	264.7	265.9
	53.25	272.4	272	271.8	271.7	271.9	272.1	272.1	271.8	271.8	271.4	271	271.3	272.1	272.5	272.8	273	273.1	273.1	273.1	273.1	273.1	273.1	273.1	273.2	273.2	273.3	273.3	273.3	273.2	273.1	273.2	273.2	273.1	273	272.7	272.3	271.8	271.2	270.3	268.9	267	265.4	264	262.9	262.8	263.7	264.8	265.7
	52.5	272.6	272.3	272	271.7	271.9	271.9	271.7	271.3	271	270.4	269.9	269.8	270.8	271	271	271.2	271.3	271.7	272.2	272.3	272.5	272.7	272.7	272.6	272.7	272.8	272.9	272.9	272.8	272.8	272.9	272.9	272.7	272.5	272.2	271.9	271.6	271	270	268.5	266.6	265	263.7	262.7	262.9	263.7	264.5	264.8
	51.75	272.7	272.3	272	271.7	271.6	271.5	271.2	270.7	270.3	269.5	268.9	268.6	269.4	269.6	269.5	269.3	270.1	270.8	271.2	271.4	272	272.4	272.4	272.2	272.2	272.3	272.4	272.4	272.5	272.5	272.4	272.2	272	271.8	271.8	271.7	271.3	270.4	269	267.4	265.9	264.8	263.9	263.2	263.4	263.9	264.3	264
	51	272.7	272.4	272	271.8	271.5	271.3	271.1	270.8	270.5	270.1	269.7	269.7	269.8	269.7	269.6	269.6	270.1	270.5	270.9	271.3	270.9	271.5	272.2	272.3	272	272	272.1	271.9	272	272	271.8	271.6	271.5	271.5	271.5	271.1	270.1	268.6	266.9	265.2	264.4	264	263.8	263.5	263.8	264.1	264.2	264.1
	50.25	272.9	272.5	272	271.7	271.4	271.2	271.1	271	270.9	270.9	270.9	270.7	270.8	270.8	270.8	270.9	271.1	271.2	271.2	271.3	271.3	271	270.9	271.9	272.2	272.1	271.9	271.8	271.8	271.6	271.5	271.5	271.5	271.4	271	270	268.1	266	264	262.4	262.4	262.7	262.9	262.9	263.2	263.5	263.6	263.3
	49.5	272.8	272.6	272.3	272	271.8	271.5	271.3	271.3	271.3	271.5	271.6	271.7	271.9	272	272	272	272	271.9	271.7	271.4	271.4	271.6	272	272.1	272.3	272.2	272	271.9	271.9	271.8	271.7	271.8	271.7	271.3	270.4	268.9	266.8	264.2	262	261	261.4	261.8	262.1	262.3	262.6	262.9	263.2	263.3
	48.75	272.3	272.8	273.1	273.1	272.9	272.6	272.2	271.9	271.8	271.8	272	272.3	272.4	272.5	272.6	272.7	272.7	272.5	271.8	270.2	270.2	271.4	272.6	272.7	272.7	272.5	272.4	272.4	272.3	272.2	272.1	271.8	271.5	270.7	269.5	267.8	266.5	264.8	262.9	261.1	261.8	262.1	262.3	262.8	263.2	263.5	263.7	264
	48	271.1	271.8	272.8	273.6	273.6	273.2	272.9	272.7	272.5	272.4	272.5	272.6	272.8	273	273	273.1	273	273	273	272.9	272.7	272.7	273.2	273.4	273.3	273	272.9	272.9	272.7	272.5	272.1	271.5	270.9	270	268.8	267.5	266.6	265.8	264.4	262.9	262.1	263	263.7	264.2	264.5	264.8	264.9	265.5
	47.25	271	271.2	272.1	273.3	273.5	273.1	272.8	272.7	272.5	272.6	272.8	273	273.4	273.5	273.6	273.7	273.7	274	274.5	274.6	274.6	274.6	274.4	274.1	273.8	273.6	273.4	273.2	272.8	272.3	271.7	271	270.6	269.8	268.7	267.4	266.5	266.4	265.2	263.5	261.9	264.4	265.4	265.7	265.6	266.2	266.1	266.6
	46.5	272.1	271.7	271.9	272.7	273.2	273	272.9	272.9	272.8	273	273.1	273.3	273.8	274.2	274.7	274.8	274.7	274.8	275.9	275.7	275.6	275.4	275	274.7	274.4	274.1	273.9	273.6	273.2	272.5	271.8	271.3	271.5	271.5	271	269.5	269.3	267.2	264.9	264.1	262.9	266.7	267.5	267	266.3	267.6	266.2	265.6
	45.75	272.3	272	272.2	272.7	273.3	273.4	273.5	274.4	274.3	274.4	274.3	274.2	274.7	275.3	275	275.4	275.7	275.4	276.2	275.9	275.7	275.5	275.2	274.8	274.6	274.4	274.3	274.1	273.8	273.2	272.5	272.2	273.8	274.4	274.2	272.9	271.1	267.6	265.1	264.6	266.5	266.8	266.5	266.1	265.8	266.4	264.8	264.2
	45	272.9	272.9	273.3	273.6	273.8	274	274.5	275.9	276.4	276.6	276.4	276.1	275.6	275.7	277	277.4	277.4	277	276	275.3	274.7	274.2	274	273	273	273.6	274.3	274.5	274.8	274.2	273.8	273.9	275	276	275.7	274.2	272.1	268.9	268.2	267.8	267.6	267.4	267	266.2	264.1	264.5	264.9	264.3
	44.25	274.9	274.6	274.6	274.2	274.3	274.7	276.4	277.4	277.9	278.2	278.2	278.1	278.2	277.6	277.9	278.5	279.1	278.9	278.6	274.2	272	271.3	270.4	268.5	268.9	271.2	273.8	274.9	275.6	275.8	274.6	275.4	276.4	277.1	277.4	275.1	272.7	269.9	267.9	266.1	267.3	267.3	266.7	265.3	262.9	265.4	265.5	265.1
	43.5	275	274.8	274.6	274.4	275.1	276.9	277.7	278.4	278.7	279	279.1	279.1	278.9	278.8	278.9	279.2	279.9	280.5	280.3	279.5	277.7	271.4	269.1	264.8	263.9	266.9	271.1	273.5	273.8	273.9	274.6	276.4	277.5	277.9	278.2	277.7	272.9	269.8	266.6	265.6	267.1	267.2	266.6	265.3	264	265.8	264.5	265.1
	42.75	273.9	274.2	274.8	275.6	276	277.9	278.8	279.3	279.6	279.8	279.8	279.4	279	278.9	279.3	279.8	280.4	280.8	281.2	281.3	280.6	279.6	277.9	266.4	262.8	262	265.2	267.6	268.7	269	268.9	275.4	277.4	278.5	278.7	278.9	277.5	274.2	266.8	267.2	267.9	267.7	267.1	266.6	266.5	267	266	265
	42	273.1	274	275.4	276.7	278.2	278.9	279.6	280	280.1	280.3	279.8	276.6	274.6	274.5	278.8	279.5	280.5	280.9	281.3	281.7	281.8	281.9	278.7	268	263	258.9	259.5	263.6	267.7	266.4	266.5	269.3	276.6	278.2	278.9	279.6	278.3	270.1	267.4	267.8	268.9	268.5	267.9	267.3	266.8	266.3	266.4	266.4
	41.25	274.7	275.5	276.7	277.9	279.1	279	279.6	279.4	279	275.4	274.3	273.2	272.2	272.4	274	275	276.2	279.2	279	279.3	278.2	277.7	268.4	264.3	260.6	259.9	259.6	265.1	269.8	269.5	268.4	269.4	272.8	277.5	278.8	279.9	279.2	276	269.5	269.1	269.9	269.4	268.5	268.4	268.2	267.6	267.5	267.6
	40.5	279.1	277.1	278.1	278.4	278.8	278.8	276.2	274.2	273.9	272.1	271.1	271.3	271.6	271.7	272.1	272.6	272.8	272.8	271.3	270	267.3	265.3	263.7	262.3	261.7	262.1	263.6	266.2	266.2	268.9	270.2	271.3	272.1	274.1	278	280.1	280.2	277.6	270.9	270.1	270.3	270	269.7	269.7	269.5	269.3	268.8	268.3
	39.75	281.4	280.8	279.9	279.3	278	276.8	274.8	273.1	272.5	272.1	271.7	271.6	271.9	272.2	272.1	271.5	270.8	270.4	269.4	267.6	264.9	264	263.9	263.3	262.7	263.5	265	266.5	265.4	266	268.7	270.5	272.3	277.4	279.4	280.9	280.9	279.9	275.7	271.4	270.8	270.6	270.7	270.9	270.7	270.1	269.4	269
	39	283	283.3	282.7	281	280	277.4	274.8	272.3	272.5	273.1	272.7	271.9	271.9	272.1	271.1	269.3	270.5	271.1	271.7	271.1	269.6	267.6	266.5	265.8	264.8	263.7	263.7	264.4	265.5	266.8	266.1	268	270.8	277.8	280.5	281.1	281.6	281.2	277.4	273.2	271.4	270.1	269.9	270.3	270.8	271.1	270.4	269.5
	38.25	283.9	285.2	285.5	283.1	280.2	277.6	275.5	272.3	273.2	273.4	272.9	272	271.3	271.3	271.6	271.1	270.4	268.2	272.1	272.8	272.7	270.2	269.3	269.4	267.7	265.6	265.2	264.3	266.2	265.5	264.2	266.1	269.2	278.9	281.7	281.8	281.9	281.6	278.5	274	272.9	271.8	269.8	268.3	268.7	270.2	271.1	270.5
	37.5	284.9	285.5	285.6	285	280.5	278.9	276.5	274.5	272.4	272	272.2	271.9	270.6	271.1	273.9	274.7	273.1	273.2	275.6	276.9	276.3	274.6	273.8	273.6	272.2	269.8	267.2	265	263.7	262.8	266	268.8	273.5	277.2	279	280.6	282.1	283.2	280.7	276	273.6	271.9	269.9	268	267.4	268	269.3	270
	36.75	285.5	285.7	286.1	286.1	285.4	284.4	280.3	276.5	276.4	274.1	272.7	272.3	273	278.3	279.7	280.4	276.7	276.6	278.8	279.9	279.9	279.1	278.5	278.5	278.5	277.2	274	269.3	264.9	263	266.6	269.5	270.1	270.5	271.6	275.9	277.2	280.6	276	273.8	271.3	269.8	268.6	267.6	267.5	267.8	267.7	267.9
	36	285.5	285.7	286.1	286.4	286.3	285.3	284.2	283.4	283.3	283.3	281.4	280.4	280.8	282.5	283.7	282.8	282	279.2	280.3	281.1	281.4	281	280.3	280.5	281.9	282.3	280.3	275.6	269.8	266.5	267.7	269.2	269.7	269.4	269.8	270	271.2	271.3	272.1	270.2	269.9	271.1	271.2	269.9	268.6	268	267.8	267
	35.25	285.1	285.4	285.9	286.2	286.4	286.1	285.8	285.7	285.7	285.5	284.6	286.6	283.9	285.3	284.4	282.1	278.6	278.7	279.9	281.3	282.2	282.2	281.8	282	283.2	284.2	283.7	281	276.4	271.7	268.6	269.9	270.5	269.2	271.3	272.7	271.9	271.6	271.6	271.9	272.5	272.3	271.4	270.3	269.3	269.2	271.3	268
	34.5	286	286	286.2	286.4	286.5	286.3	286	285.6	285.3	285	284.8	285.2	284.5	285.5	283.8	279.3	276.9	277.1	278.5	280.5	281.6	281.9	281.7	281.8	282.6	283.7	284.1	283.3	279.5	274.6	271.9	272.3	271.8	271.7	272.5	273.9	274.7	274.7	274.9	275	274.6	273.5	271.9	270.6	269.7	269.1	269.9	270.4
	33.75	286.9	286.7	286.7	286.8	286.9	286.8	286.4	286	285.7	285.5	285.3	285.3	285.6	286	283.7	277.2	275.8	276.3	277.6	279.5	280.5	280.9	281.3	281.7	282.2	282.6	283	283.4	281.6	277.7	275.5	274.6	273.4	272.6	272.5	272.7	273.5	274.6	275.5	275.5	274.9	274	272.7	271.6	270	267.9	266.3	266.9
	33	287.8	287.6	287.6	287.6	287.5	287.3	286.9	286.5	286.1	286	285.9	286.1	286.3	286.2	283.4	277.2	276	276.4	277.5	278.6	279.5	280.3	280.8	281.4	282	282.1	282	282.5	283.2	281.8	280.2	279.3	277.4	274.1	272.3	272.5	273.5	274.7	275.5	275.6	275.1	274.5	274.1	273.5	272.1	269.3	265.4	265.9
	32.25	288.3	288.5	288.4	288.3	288.3	288	287.5	287.1	286.3	286.2	286.5	286.5	286.8	285.4	281.5	278.4	277.4	277	277.2	277.9	278.8	279.7	280.5	281.3	281.3	281.1	280.9	281.2	282.6	283.7	284	283.9	282.8	278.7	273.6	272.7	274.1	275.1	275.5	275.1	274.9	274.9	274.6	275.1	274.4	271.6	267.3	268
	31.5	288.2	288.1	287.8	287.9	288.2	288.2	287.7	287.1	286.4	286.7	285.7	286.4	285.8	281.1	280	279.5	278.9	278.2	277.3	277.4	277.9	278.9	280.1	280.8	280.5	280.2	280.3	281	282	282.7	283.9	285.9	286.5	283.6	277.5	272.3	273.4	274.7	275.3	274.1	274	274.5	273.5	274.6	277.2	273.6	269.5	268.4
	30.75	287.8	287.6	287	286	286.6	287.5	287.4	286.6	284.9	283.3	283.2	282.7	281.4	280.4	280	279.5	279	278.7	277.8	277.2	277.2	278	279.3	280.1	280.1	279.7	279.9	281.1	281.9	282.2	283	285.8	288.3	287.2	282.6	276.5	273.6	273.3	274.1	273.1	273	273.5	271.8	271.9	275.5	276.4	271.5	267.9
	30	287.6	287.2	286.7	286	286.7	286.5	286.3	285.5	285.2	283.1	282.4	281.5	280.1	279.7	278.9	278.6	278.4	277.9	278	277.5	277.2	277.9	278.8	279.6	279.8	279.4	279.2	280.1	281.2	281.8	282.2	284.9	287.3	288.4	285.1	282.9	277.1	274.1	273.5	272.9	272.8	272.8	270.6	268.4	271.6	275.4	272.7	267.9
	29.25	286	285.9	285.8	286	286.9	284.7	284.4	284.5	285.6	283.9	283.7	281.7	279.2	279.8	279.1	278	278.3	277.5	278.1	278.2	277.9	278.3	278.7	279.3	279.1	278.7	278.4	279	280.5	281.2	281.3	284	287.7	289.8	289	287.8	282.2	277.1	276.2	275.3	274.9	273.4	271.5	268.9	270.2	272.9	272.5	268.2
	28.5	284.8	284.1	284.2	284.6	284.4	282.8	283.6	284.4	285.9	283	283.1	282.2	281.9	284	282.4	278.7	277.7	278.5	278.6	278.6	278.2	278.4	278.7	279.2	279	278.2	277.9	279.1	281.2	281.9	281.2	283.2	287.8	290.9	291.3	290.4	286.6	280.7	278.7	277	275.8	276.4	274	272.7	273.8	273.3	271.8	269.2
	27.75	285.6	284.5	283.8	283.3	282.1	282.1	282.4	285.8	285.4	282.4	281.5	283.4	286.8	290.2	288.4	281.3	277.6	278	279.2	279.3	279	278.9	278.9	279.2	279.5	279	278.7	280.1	282.6	283.7	282.6	283.2	287.5	289.9	292.1	292.3	290.7	284.5	281	279.4	278.8	282.4	283	275.3	276.3	276.5	274.3	271.3
	27	285.3	285	284.6	283.4	282.1	281.4	282.8	285.3	285	281.9	282.3	282.6	286.4	291.9	292.6	285.6	280.7	279.1	280.1	280	279.1	279.1	279.1	279.7	280.4	280.5	280.9	281.8	283.5	284.3	284.2	284.8	286.5	289.2	291.1	292.8	293.2	291.2	286.7	283	284.8	286	288.8	279.1	276.4	278.7	275.9	274.2
	26.25	283	284.3	283.9	283.1	281.4	281.7	282.7	282.4	281.3	282.4	282.6	284.2	284.8	290.6	294	292.1	286.1	282.4	281.7	280.9	279.4	280.1	280.7	281.5	281.9	282.1	282.3	282.8	283.5	283.7	284.1	285.7	286.4	287.6	289.5	291.4	293.2	293.6	292.7	291.9	291.6	291.5	291.7	289.6	281.7	277.9	276.9	275.7
	25.5	281.9	281	282	283.8	281.4	281.2	281.5	280.7	281.9	281.7	283.4	285.1	283.9	285.6	292.5	294.4	292.1	285.8	283.6	282.8	280.8	280.6	281.2	282.3	282.6	282.4	283.1	283.6	283.3	283.3	284.5	285.5	285.8	286.1	287.3	288.8	292.2	293.6	293.5	293.1	292.4	289.7	286.4	291	290.2	287.1	285.3	279.9
	24.75	281.8	280.4	281.1	282.1	281	281	281.4	282.1	282.3	282.5	284.2	285.9	284.5	284	292	294	293.6	288.5	286	284	282.5	281.6	281.4	282.2	282.5	282.6	283.7	284.4	284	284.6	285.5	285.3	285.2	285.5	286.3	287.9	292	292.7	292.7	292.1	289.4	288.3	286.9	290.3	291.8	290.7	290.5	290.2
	24	281.1	279.4	280	281	280.6	281.6	282.2	282.9	283.2	283.2	284.5	285.9	284.9	284.3	286.6	294.2	294.8	294.7	292.4	286.8	283.7	282.4	282.1	282.8	283.3	284	285.2	285.7	285.6	285.3	285.4	285	285	285.5	286.2	287.3	288.5	288.9	288.5	287.6	287.9	286.6	285.6	285.6	290.2	290.3	290.6	291
	23.25	280.2	279.2	279.6	280.4	281	281.8	282.5	283.2	283.7	283.6	284.2	284.9	284.5	284.6	286.8	294.2	295.2	295.5	295.6	289.7	285.6	283.3	283.1	284.3	284.4	285.1	286.1	286.6	286.4	285	284.9	284.9	285.3	286	286.5	287	287.6	287.5	287	286.1	286.1	286.4	285	283.9	284.4	285.2	289.1	291
	22.5	279.8	279.4	280	280.4	281	281.7	282.5	283.2	283.8	283.7	284.1	284.8	284.7	284	285.8	289.2	294.4	295.5	296.1	294.5	287.2	284.4	284.4	285.8	285.8	286	286.3	286.7	286.1	284.7	284.8	285.2	286	286.8	287.1	287.3	287.5	287.4	286.9	286	285.6	286.2	286	284.7	284.1	283.6	285	291.1
	21.75	280.1	279.4	279.7	280.3	281	281.8	282.8	283.6	284.1	283.8	284.2	285	285.2	284.5	285.6	287	289.6	295.1	296.6	292.5	288.6	285.1	285.3	286.8	287.4	287.3	286.6	286.8	286.2	285.2	285.5	286.1	286.9	287.4	287.6	287.7	287.7	287.5	286.9	286.2	285.9	286.1	286.2	285.8	285.5	285.1	285.9	292.3
	21	280.7	280.2	280.2	280.6	281.3	282.3	283.4	284.4	284.9	284.8	285.2	285.9	286.4	286.3	287	286.9	289	295.1	297	295.9	290.8	287	286.3	287.1	288.1	288.2	287.4	287.3	286.8	286.1	286.5	287.1	287.6	287.9	288	288.1	287.9	287.5	287	286.4	286.2	285.9	285.8	285.8	286.1	287	292.5	293.7
	20.25	281	281	280.9	280.8	281.6	282.9	284.2	285.2	285.8	285.9	286.3	286.7	287.5	288	289	288.5	288.7	295.5	297.5	297	296.5	290.4	289.3	287.4	287.4	287.6	287.3	287.4	287.2	287	287.2	287.7	288.1	288.3	288.4	288.4	288.3	287.7	287.1	286.7	286.3	285.9	285.5	285.6	286.8	293.1	294.1	294.6
	19.5	281.3	281.6	281.6	281.3	281.9	283.3	284.7	286	286.4	286.4	286.7	287	288	289.4	290.7	289.8	289.1	295.3	297.9	298	298.1	297.2	292.8	288.5	285.9	285.6	286.1	287.1	287.5	287.3	287.5	288	288.4	288.6	288.7	288.7	288.3	287.7	287.2	286.8	286.5	286	285.8	286.5	288.2	294.3	295	295.1
	18.75	281.6	282.2	282.3	282.2	282.5	283.6	284.8	285.9	286.8	287.4	287.1	287.4	288.8	290.7	292.1	291.1	289.9	294.5	297.1	298.5	298.4	297.7	294.6	291	285.2	283.6	284.8	286.4	287.2	287.4	287.8	288.3	288.7	288.9	288.9	288.8	288.2	287.5	287	286.8	286.6	286.3	289.6	293.4	294.6	295.2	295.4	295.6
	18	281.9	282.7	283	283.1	283.5	284.3	285.2	285.9	287	287.8	287.7	288.3	289.6	291.6	293.1	292.6	291.8	292.6	293.7	297.2	298	298	298	293	288	283.3	284.9	287	287	287.9	288.4	288.9	289	288.8	288.5	288	287.3	286.7	286.3	286.3	286.3	288	293.3	295.5	295.6	295.7	295.8	296.1
	17.25	282.4	283	283.2	283.6	284.3	285.2	285.9	286.3	286.8	287.4	288	289	290.2	292.2	294.1	294.4	293.8	293.1	292.7	296.5	297.7	298.5	299.3	298.7	291	286	285.4	287	287.4	288.4	288.2	288.1	287.9	287.3	286.8	286.5	286.5	286.5	286.7	287.4	288.4	293.7	295.9	295.8	295.9	296.1	296.3	296.5
	16.5	283	283	283.2	283.6	284.4	285.5	286.3	286.6	286.9	287.6	288.6	289.3	290.3	291.9	294.1	295.3	295.4	294.1	292.1	292.7	297.6	298.9	299.3	299.1	294.9	288.9	285	285.7	287.2	288.2	286.7	286.1	286.2	285.8	285.6	286.5	288.5	292.9	293.8	294.4	294.8	295.5	295.7	295.7	296	296.2	296.6	296.9
	15.75	283.3	282.7	282.5	283	284.6	285.8	286.4	286.9	287.4	288.4	289.2	289.6	290	290.3	292.4	294.1	294.5	292.8	290	291.9	296.3	298.8	299.1	298.9	295.7	289.6	284.3	285.7	287.8	288.3	286.4	285.2	285.3	285.7	286.4	288.3	291.8	296.3	296.7	296.4	296	295.7	295.7	295.8	296	296.4	296.9	297.1
	15	283.8	282.4	282.4	283.5	285.3	286.3	286.7	287.4	288.2	289	289.5	289.4	289.4	289.9	291.3	292.6	291.8	290	288.4	288.1	292.9	296.5	298.7	298.9	298.3	292	284.3	284.4	286.8	286.8	285.8	285.3	285.8	287.3	292.3	295.1	296.5	297.3	297.1	296.5	296	296	296.1	296.2	296.3	296.7	297	297.3
	14.25	283.6	283.2	284.7	285.8	286.4	286.5	286.6	287	287.8	288.5	289	289.2	289.6	290.3	291.3	292	290.6	289.2	286.7	285	289.7	295.4	296.9	298.2	297.8	292.4	286.1	284	285.1	286.3	287.5	288.7	290.3	295.6	296.9	297.5	297.8	297.5	297.2	296.8	296.3	296.2	296.4	296.6	296.7	296.9	297.2	297.4
	13.5	282.6	283.8	286.3	287	286.9	286.7	286.6	286.8	287.4	288.2	288.9	289.5	290.2	291.2	292.1	291.6	288.7	287.8	285.8	284.8	289.1	294.4	295.9	295.6	297.2	292.9	289.2	288	288.3	290.5	296.1	296.9	297.6	298	298.1	297.9	297.7	297.5	297.3	297.1	296.7	296.6	296.7	296.8	296.9	297.2	297.4	297.5
	12.75	283.7	286.4	287.5	288	288	287.7	287.3	287.4	287.6	288.4	289.7	290.2	290.8	292	292.6	290.3	286.5	285.9	285.6	285.2	289.3	294	294.7	293.9	294	294.7	292.8	296.5	297	297.8	298.1	298.4	298.3	298	297.8	297.7	297.7	297.6	297.3	297.1	296.9	296.9	296.9	297	297.2	297.4	297.5	297.7
	12	287.8	288.4	288.8	289.1	289	288.9	288.5	288.1	287.9	289.1	290.9	291	291	291.7	290.8	287.8	285.3	284	284.2	284.7	288.3	292.7	293.3	292.4	292.8	297	298	298.3	298.5	298.5	298	297.7	297.5	296.9	296.3	296.8	297.4	297.6	297.5	297.2	297.2	297.1	297	297.1	297.4	297.6	297.7	297.8
	11.25	289.2	289.3	289.5	289.9	290	290.3	290.1	289.1	289.4	291	292.4	292.2	291	290	288.3	287	285.1	283.4	283.2	283.8	286.7	291.6	292.8	291.8	291.5	296.4	297.9	298.1	297.9	297.2	296.2	295.3	290.3	290.5	291.5	293.1	297.3	297.7	297.6	297.5	297.3	297.1	297.2	297.3	297.6	297.7	297.9	297.9
	10.5	289.3	289.4	289.7	290.3	290.9	291.6	291.8	291.1	291.5	292.8	293.4	293.3	291.3	288.3	288.5	287.7	285.9	284.9	284.5	283.8	285.6	290.4	292.4	291.1	289.4	290.1	291.1	290.9	290.6	290	289.1	287.9	288.2	289.3	291	296.2	297.4	297.7	297.6	297.5	297.4	297.3	297.4	297.6	297.8	298	298.1	298.1
	9.75	288.9	288.9	289.7	290.7	291.6	292.4	292.9	293	293.1	293.7	294	294.2	291.3	288.5	288.7	288.6	287.2	286.3	285.1	283.6	286.5	290.4	290.5	289.2	286.5	286	288.1	288.5	288.9	289.2	289	288.5	288.6	289.8	292.2	296.7	297.6	297.7	297.6	297.6	297.6	297.7	297.8	298	298.1	298.2	298.2	298.3
	9	289.4	289.8	290.7	291.3	292.3	293	293.4	293.4	293.8	294.1	294.6	295	292	289.9	288.7	288.3	287.2	286	284.8	284.9	288.2	289.2	288	288.4	287.2	286.6	287.7	288.8	289.2	289.9	291	290.6	290.3	291.3	293.1	297.1	297.8	297.8	297.8	297.9	297.9	298	298.2	298.3	298.4	298.4	298.5	298.7
	8.25	290.9	291.1	292.2	293	293.9	293.9	293.9	294.2	295.3	294.7	294.7	294.8	294.3	292.1	289	287.1	286.3	285.3	285	285.8	287.3	288.1	289.7	291	289.9	289.4	289.8	290.6	290.9	291.3	291.5	291.1	291.5	293	296.6	297.4	297.7	297.8	297.9	298	298.2	298.3	298.5	298.6	298.6	298.7	298.9	299.1
	7.5	292.8	292.9	293.4	294	294.8	295.3	294.7	294.5	295.9	294.9	294.6	294.3	295.4	293.5	289.2	285.8	284.7	285.7	285.8	284.5	285.1	288.1	291.8	293	291.7	291.3	291.3	291.7	292.4	292.7	292.5	292.3	293.1	294.5	297.2	297.7	297.7	297.9	298.1	298.2	298.5	298.6	298.8	298.8	298.9	299.2	299.4	299.2
	6.75	294.5	294.6	294.5	294.7	295.3	295.9	296.1	296.1	296.4	296	294.7	294.5	294.8	293.7	290.2	288	286.6	286.8	285.2	283.7	285.7	290.5	293.6	293.4	293.7	294	293.6	293.1	293.2	293.6	293.7	293.9	294.6	297.4	297.9	297.8	297.8	298	298.2	298.4	298.7	298.9	298.9	299.1	299.4	299.6	299.6	299.1
	6	293.9	295.2	295.3	295.3	295.8	296.3	296.4	296.3	296.2	295.1	295.2	295.6	294.4	292.3	291.4	291.1	289.1	287.5	285.6	285.1	288.3	292.4	293.2	293.1	294.9	295.9	295.3	294.4	293.9	294.2	294.4	294.8	295.6	298	298.3	298.2	298.2	298.3	298.4	298.6	298.9	299	299	299.3	299.6	299.8	299.7	299
	5.25	294.2	294.8	293.4	295.2	296.3	296.8	296.6	296.2	296.2	296.5	295.2	296.2	296	293.4	292.6	293.3	291.5	290.3	289	289.7	291.2	292.9	294.1	294.5	295.4	295.3	295	294.6	294.1	294.6	294.9	295.5	297.9	298.6	298.6	298.5	298.5	298.6	298.7	298.8	299	299.1	299.2	299.4	299.7	299.8	299.6	299.1
	4.5	294	293.8	294	295.2	296	296.6	296.9	296.2	295.7	295.5	294.6	293.1	294	296.1	296.8	298.3	297.5	295.6	293.1	292.6	293	293.7	294.7	295.7	296	294.8	293.8	294.3	294.4	294.7	295.3	297.8	298.7	298.9	298.8	298.7	298.7	298.7	298.8	298.9	299	299.1	299.2	299.4	299.7	299.7	299.5	298.9
	3.75	294.1	294.2	294.5	295	295.3	296.2	296.3	295.6	295.2	295.3	294.8	292	292.3	295	298.8	299.8	299.2	297.5	295.2	294.4	295	296.1	296.8	297.2	297.3	295.5	294.2	294.9	294.9	295.1	296.2	298.6	299.1	299.1	299	298.9	298.9	298.8	298.9	299	299.1	299.1	299.3	299.4	299.5	299.6	299.3	298.9
	3	294.4	294.4	294.4	294.3	294.5	294.6	294.6	293.9	293.9	295	294.4	294.1	293.3	294.2	296.2	298.9	298.6	297.5	296.3	296	297.1	298.2	298.4	298.6	298.1	296.6	296	296.1	295.9	297.7	298.5	299.2	299.2	299.2	299.1	299	298.9	298.9	298.9	299	299.1	299.2	299.3	299.4	299.4	299.4	299.2	299
	2.25	294.8	294.7	294.5	294.3	294	293.8	293.2	291.9	292.2	294	294.3	294.5	294.2	293.2	293.8	296.3	296.2	295.8	295.8	296.6	297.6	299.2	299.8	299.6	298.9	297.9	297.5	297.1	297	298.7	299.2	299.3	299.3	299.1	299	298.9	298.8	298.7	298.7	298.9	299	299.2	299.3	299.4	299.2	299.1	298.9	298.9
	1.5	295	294.8	294.4	294.1	293.9	293.4	292.7	291.4	291.1	292	292.5	293	292.7	291	291.3	293	292.7	293.4	295.6	297.4	299.1	300.3	300.3	300	299.3	298.5	298.5	298.9	299	299.2	299.3	299.3	299.3	299.1	298.9	298.7	298.6	298.6	298.6	298.8	299	299.1	299.2	299.1	299	299	298.8	298.8
	0.75	295	294.5	293.8	293.4	293.2	292.6	291.7	290.7	290.4	290.2	291	291.6	291.4	289.2	289	290.4	289.6	290.8	294.7	297.3	299.5	300.4	300.2	299.7	299.1	298.8	299.4	299.2	299.1	299.2	299.2	299.2	299.3	299.2	298.9	298.6	298.5	298.6	298.7	298.8	298.9	299	299	298.9	298.9	298.8	298.6	298.7
	0	294.8	294.4	293.6	292.8	292.1	291.1	290.5	290	289.7	289.7	292.3	293.4	293.4	289.4	288.3	288.3	287.4	289.2	293.8	296.8	298.8	299.5	299.2	299	298.9	299.3	299.3	299.1	299.1	299.2	299.2	299.3	299.3	299.2	298.9	298.7	298.7	298.8	298.9	299.1	299.2	299.1	299.1	299.1	299.1	299	298.9	299.2
	-0.75	294.7	294.4	293.6	292.6	291.5	290	289.2	289.8	289.8	290.2	292.7	293.9	293.6	289.3	288.1	288.1	288.2	290.2	293.9	296.4	297.8	298.3	298.4	298.7	299.3	299.3	299.1	299.1	299.2	299.3	299.3	299.4	299.5	299.3	299.2	299.1	299.1	299.1	299.3	299.3	299.3	299.3	299.2	299.2	299.2	299.3	299.3	299.5
	-1.5	294.5	294.4	293.6	292.6	291.6	289.8	288.6	289.3	289.8	290.4	292.2	293.4	291.5	289.3	288.7	290.4	291.1	292.1	294.3	296	296.9	297.8	298.5	299.4	299.4	299.2	299.2	299.3	299.4	299.5	299.5	299.6	299.6	299.5	299.4	299.5	299.7	299.6	299.6	299.6	299.5	299.5	299.1	298.8	298.7	299	299.1	299.3
	-2.25	294.2	294.3	293.8	292.9	291.9	289.9	288.7	289.5	290.3	290.6	291.7	292.6	291.6	290.1	290.2	293.1	292.9	292.7	294.7	296.2	297.1	298.2	299.3	299.4	299.3	299.3	299.4	299.6	299.8	299.8	299.8	299.8	299.7	299.7	299.7	300	300.3	300.2	300	299.8	299.9	299.8	298.9	298.2	298.1	298.4	298.6	298.8
	-3	294.1	294.3	293.8	293	291.9	289.9	289.1	289.8	290.3	290.7	290.9	291.8	291.7	290.8	291	292.8	292.6	292.4	294.5	296.3	297.1	298.9	299.4	299.4	299.4	299.4	299.7	300	300.2	300.2	300.1	299.9	299.9	300	300.1	300.4	300.6	300.4	300	299.7	300.1	300.1	299.2	298.3	298	298.3	298.4	298.5
	-3.75	294.2	294.3	294.1	293.1	291.8	290.2	289.9	290.3	290.2	290.5	290.8	291.5	292.2	291.7	291.6	293.3	294.4	293.2	293.9	296.1	297.4	299.3	299.6	299.4	299.3	299.4	299.9	300.3	300.4	300.4	300.3	300.2	300.1	300.2	300.4	300.6	300.7	300.6	300.2	299.9	300	300	299.6	298.8	298.5	298.6	298.6	298.5
	-4.5	294.2	294	294	293.6	292.7	291.6	292	291	290.4	290.5	290.8	291.4	292.3	291.9	291.8	293.3	294.5	294.1	294.6	296	298.8	299.7	299.7	299.3	299.1	299.4	300	300.5	300.6	300.6	300.6	300.4	300.4	300.4	300.6	300.7	300.7	300.5	300.2	300	299.9	299.9	299.8	299.4	299.1	298.9	298.9	298.8
	-5.25	293.8	293.7	293.9	293.9	293.2	292.4	293.4	291.7	290.6	290.7	291	291.4	291.9	292.1	292.6	293.8	293.3	294.1	295.6	298.3	299.5	299.9	299.7	299.3	299.2	299.6	300.3	300.7	300.9	300.9	300.9	300.7	300.7	300.7	300.7	300.8	300.7	300.4	299.9	299.5	299.4	299.7	299.8	299.6	299.2	299	299	299
	-6	293.5	293.4	293.8	294.1	293.7	292.9	293	291.1	290.6	290.5	290.9	291.1	291	292.1	293.5	293.9	293.6	294.7	296.4	299.3	300.1	300.1	299.8	299.5	299.6	300.1	300.6	301	301.1	301.1	301	300.9	300.8	300.8	300.7	300.6	300.4	300	299.4	299	299.1	299.7	299.8	299.3	298.9	299.2	299.5	299.3
	-6.75	293.2	293.2	293.4	293.9	293.9	292.5	291.4	293	291.8	290.7	290.8	290.6	290.5	291.7	293.6	294.2	293.9	295	296.8	298.1	299.9	300.1	299.9	299.9	300.1	300.5	300.9	301.1	301.2	301.2	301.1	300.8	300.6	300.5	300.4	300.2	299.9	299.5	299.3	299.3	299.7	299.8	299.7	299.2	298.9	299.5	299.9	299.8
	-7.5	292.9	293.1	293.4	293.7	293.6	292.4	290.8	291.1	292	290.8	291.2	290.6	290.3	291.2	291.8	293	294.4	295.8	296.7	297.9	299.6	300.1	300.1	300.1	300.4	300.6	300.5	300.6	300.6	300.6	300.6	300.2	299.8	299.7	299.6	299.5	299.5	299.5	299.4	299.6	299.8	299.8	299.7	299.2	299.1	299.6	299.8	300
	-8.25	292.6	293.3	293.8	293.3	292.6	292.2	291.1	291.2	292.1	290.3	291.6	290.8	289.7	290.1	290.1	292.4	296	297.3	297.3	298.1	299.6	300.2	300.2	300.2	300.3	300.1	299.6	299.6	299.6	299.7	299.6	299.5	299.2	299	298.9	298.9	299.1	299.2	299.2	299.4	299.6	299.5	299.4	299.3	299.3	299.4	299.6	300.1
	-9	292.4	293.2	293.2	292.3	291.7	292.4	291.5	291.4	290.7	289.6	290.4	290.2	289.8	289.8	290.9	293.3	295.9	296.5	296.7	297.6	299.7	300.1	300.3	300.2	299.8	299.3	299	299	299.1	299.2	299.3	299.4	299.2	299.1	299	298.9	299	299.1	299.1	299	299.2	299.3	299.3	299.5	299.4	299.5	299.7	300.4
	-9.75	292.3	292.1	291.8	291.6	291.5	291.6	291.2	290.6	290.1	289.7	289.7	289.9	290.4	291	292.1	293.1	294	294.9	295.9	297	298.2	300.2	300.4	300.1	299.2	298.7	298.8	298.9	299.1	299.3	299.5	299.4	299.3	299.4	299.4	299.2	299.1	299.1	299.2	299.1	299.1	299.2	299.3	299.5	299.5	299.7	300.1	300.8
	-10.5	291.6	290.8	290.6	291.2	291.3	291.2	291.1	290.8	290.5	290	289.7	289.9	290.4	292.5	292.1	292.4	293.2	294.7	295.9	296.6	297.8	300.1	300.4	300.1	299.1	299	299.3	299.3	299.2	299.2	299.4	299.3	299.2	299.2	299.1	299	299	299.1	299.3	299.4	299.3	299.2	299.3	299.3	299.5	300	300.7	301.1
	-11.25	291.1	290.5	290.3	290.8	291.1	291.1	291.3	291.3	291	290.3	290.2	290.6	290.7	294.1	292.8	293	293.7	295.2	296.5	296.4	296.8	299.8	300.5	300.2	299.5	299.5	300.1	300	299.6	299.4	299.3	299.2	299	298.9	299	299.1	299.1	299	299.2	299.3	299.3	299.1	299	299	299.7	300.3	301	301.4
	-12	291.2	290.9	290.6	290.9	291	291.2	291.4	291.4	290.8	290.9	291.7	291.4	291.4	295.3	294.2	293.9	294.7	295.7	296.3	295.9	296	299.7	300.6	300.6	300.2	300.1	300.4	300.3	299.9	299.9	299.6	299.2	298.8	298.9	299.4	299.6	299.5	299.2	299	299	299.1	299	298.7	299.2	300.1	300.5	301.1	301.1
	-12.75	291.7	291.5	291.2	291.2	291.2	291.2	291.2	291.1	291.1	292	292.9	291.4	291.7	295.6	294.4	293.6	294.4	295.2	295.6	295.5	295.5	299.7	300.7	300.9	300.7	300.6	300.5	300.4	300.2	300.3	299.9	299	297.7	296.6	299	300	300	299.6	298.9	298.7	298.8	298.9	298.7	299.8	300.5	300.3	300.5	300.1
	-13.5	291.9	291.7	291.4	291.5	291.5	291.4	291.3	291.8	292.6	293.3	292.9	291.3	291.6	294.9	294.3	293.6	293.8	294.4	295.4	295.5	295.4	299.4	300.6	301	300.9	300.7	300.4	300.4	300.3	300.3	299.7	298.5	294.6	294.2	298.7	300.1	300.4	299.9	299.2	298.9	298.8	299.1	299.1	299.9	300.1	299.5	299.3	299.1
	-14.25	291.9	291.9	291.9	292	292.2	292.2	292.4	293.3	293.9	293.4	292.9	292.1	291.4	293.1	294.2	294.1	294.1	294.7	295.4	295.6	296	298.2	300.6	300.9	300.8	300.6	300.2	300	299.9	299.6	299.7	297	293.3	292.9	298.2	299.6	300.2	300	299.4	299.2	299.2	299.7	299.5	299.3	299	298.9	299.1	299.5
	-15	292.1	292.3	292.6	292.7	292.8	292.9	293.6	294.6	294.4	293.8	293.9	294.3	293.1	292.7	294	294.1	294.2	294.5	295.3	296.1	296.8	297.9	300.4	300.7	300.5	300.1	299.6	299.4	298.9	298.5	298.2	296.4	293.3	292.6	294.8	298.7	299.7	299.8	299.6	299.6	299.8	299.9	299.4	299	299.2	299.9	300.4	300.5
	-15.75	292.8	293	293.3	293.3	293.4	293.8	294.4	295.3	296	295.7	295.8	296.3	295.9	295	294.4	294	294.3	295	296	297.1	298	299.9	300.6	300.8	300.3	299.5	298.9	298.2	297.3	297	298.2	296.6	293.4	292.9	296.5	298.9	300.1	300	299.9	299.9	299.9	299.7	299	299.3	300.1	300.7	300.9	300.9
	-16.5	293.7	293.5	293.1	293.1	294	294.7	294.1	293.7	294.1	294.7	295.4	296.4	297	297	296.2	295.3	295.4	296.1	296.8	297.8	299.6	300.4	301.1	300.8	300	299.2	297.9	296.3	295.7	296.4	296.9	294.2	292	293	297.3	298.7	299.9	300.2	300.1	299.9	299.7	299.4	299.3	300	300.6	300.7	300.9	300.8
	-17.25	294.2	293.9	293.4	293.7	294.6	294.7	293.6	292.4	291.9	292.5	293.5	294.7	296	297.1	297	296.3	296.4	296.9	298.8	299.6	300.4	300.9	300.9	300.3	299.6	298.4	296.8	295.7	295.2	294.8	293.8	292.3	292	296.7	298.1	298.9	299.9	300.4	300.2	300	299.6	299.6	300.4	300.9	301.1	301	300.9	300.7
	-18	294.1	294.1	294.1	294.4	294.3	293.7	293.2	292.4	291.3	291.2	291.8	293.3	295.4	296.6	296.9	297	297.9	299.3	300.1	300.9	301.1	301	300.7	300	299.5	298.5	297	296	294.6	292.2	290.9	290.7	292.4	297.3	299	300.2	301	301.2	300.8	300.5	300.2	299.9	300.3	300.7	300.9	300.7	300.7	300.6
	-18.75	293.9	293.9	293.9	293.8	293.4	292.7	292.3	291.8	291.3	291.3	292	293.9	296.2	296.9	296.9	297.5	299.3	300	300.4	301	301	300.8	300.5	300	299.5	298.9	298.1	296	294.5	291.5	289.2	289.8	292.8	297.3	299.2	300.2	300.8	301.1	301.1	301.1	300.9	300.3	300.2	300.2	300.2	300.3	300.4	300.5
	-19.5	294	293.9	293.7	293.2	292.6	291.8	291.2	291.2	291.2	291.9	292.5	294.1	296.7	297.5	297.7	298.7	299.1	299.6	300.1	300.5	300.4	300.7	300.5	300.1	299.8	299.3	298.6	296.7	294.9	291.2	288.5	289.8	293	298.1	299.3	300.1	300.5	300.8	301.1	301.4	301.3	300.9	300.7	300.5	300.2	300.4	300.5	300.5
	-20.25	294.1	294.2	294	293.2	292.1	291.5	291.4	291.8	292.1	292.6	292.9	293.9	296.4	297.4	298.8	298.8	298.8	299.5	300	300.4	300.5	300.8	300.8	300.6	300.4	299.7	299	297.4	295.1	291.2	289.2	291.4	297.2	298.7	299.4	300.1	300.4	300.5	300.9	301.4	301.3	300.9	300.8	300.6	300.4	300.5	300.5	300.4
	-21	293.6	293.9	293.7	293	292.4	292.3	292.6	292.9	293.2	293.6	293.9	294.6	296	296.8	298.6	299.1	299.4	300	300.3	300.6	300.6	300.8	300.8	300.8	300.7	300.1	298.7	297.5	295.1	291.7	290.9	293.7	298.3	299.1	299.4	300	300.5	300.6	300.7	301.1	300.8	300.2	300.4	300.5	300.4	300.3	300.2	300
	-21.75	293	293.1	292.9	292.8	293.1	293.6	294.1	294.1	293.9	293.9	294.2	294.8	295.3	295.9	296.8	299.6	300.4	300.3	300.3	300.3	300.3	300.3	300.3	300.2	300.2	299.9	298.6	296.6	294.8	292.3	293	295.4	299.3	299.5	299.6	300	300.7	300.7	300.4	300.5	300.3	299.9	300.2	300.3	300.2	300	299.7	299.4
	-22.5	292.9	292.8	292.7	292.8	293.5	294	294.2	294.1	293.9	293.9	294.2	294.5	294.9	295.2	296.2	299.4	300.2	299.9	299.8	299.9	299.8	299.7	299.8	299.8	299.6	299.9	298.3	295.4	293.8	292.9	294.8	299	299.8	299.9	299.9	300.2	300.5	300.4	300.2	300	299.8	299.6	299.7	299.7	299.7	299.5	299.1	298.8
	-23.25	292.7	292.6	292.9	293.3	293.6	293.5	293.1	293.1	293.7	294.2	294.6	294.8	294.9	295	296	299.1	299.5	299.3	299.3	299.4	299.4	299.4	299.4	299.5	299.5	299.6	298.8	295.8	293.6	293.2	295.8	299.2	299.7	299.8	299.8	300	300.2	300.2	300.1	299.8	299.4	299.1	299	298.9	298.8	298.5	298.2	298.1
	-24	292.1	292.3	293.1	293.7	293.3	292.5	292.1	292.1	292.9	294	294.8	295.3	295.4	295.7	296.5	298.9	298.9	298.8	298.7	298.8	298.9	298.9	299	299.1	299.3	299.8	300	297.2	294.7	294.2	295.9	299.1	299.4	299.5	299.4	299.6	299.8	299.9	299.9	299.7	299.3	298.9	298.3	298	297.9	297.6	297.6	297.6
	-24.75	291.7	291.7	292.5	293.2	292.8	292.1	291.2	290.1	290.9	293.2	294.6	295.4	295.8	296.3	298.2	298.6	298.6	298.4	298.3	298.2	298.2	298.3	298.5	298.7	298.9	299.3	300.3	298.9	296.8	296.1	298.3	299.3	299.2	299.1	299	299.2	299.4	299.6	299.7	299.6	299	298.3	297.7	297.3	297.2	297.2	297.4	297.4
	-25.5	292.3	291.6	291.5	291.6	291.3	290.3	288.8	287.6	288.7	291.9	294.6	297.1	297.6	298	298.4	298.5	298.5	298.3	298	297.7	297.5	297.7	297.9	298.2	298.5	298.8	299.4	299.5	298.6	298.3	299.1	299.3	298.7	298.6	298.5	298.7	298.9	299.1	299.2	298.9	298.3	297.8	297.4	297.2	297.2	297.3	297.3	297.3
	-26.25	293.6	292.2	291.1	290.6	289.7	288.3	287.1	285.4	288	290.4	294	297	298	298.3	298.5	298.6	298.6	298.3	297.8	297.2	297.1	297.2	297.5	298	298.2	298.4	299	299.4	299.1	298.9	299.1	298.7	297.9	297.9	298.1	298.4	298.4	298.3	298.4	298.1	297.6	297.4	297.4	297.3	297.4	297.3	297.1	296.9
	-27	294.8	293.8	292.1	291.1	289.6	288	286.8	286.1	288.2	290.1	293.3	296.6	297.9	298.3	298.5	298.5	298.5	298.3	297.9	297	296.8	296.9	297.2	297.8	298	298.3	298.8	299.2	298.9	298.5	298.2	297.7	297.4	297.8	297.9	297.8	297.5	297.2	297.1	297	297.1	297.2	297.2	297.2	297.1	296.8	296.6	296.4
	-27.75	296.9	295.9	294.1	292.3	289.8	287.3	286.3	288.1	287.7	290.9	293.4	296.4	297.7	298	298.2	298.2	298.1	298	297.8	297.1	296.9	296.9	297.2	297.6	298.1	298.3	298.5	298.5	298.2	297.8	297.4	297.1	297.2	297.3	297	296.7	296.5	296.4	296.5	296.6	296.8	297	297	296.9	296.5	296.1	295.8	295.6
	-28.5	298.4	296.8	294.8	292.5	289.2	285.1	287.2	288.6	289	290.6	294.4	296.5	297.4	297.7	297.7	297.5	297.4	297.5	297.4	297.2	297	296.8	297	297.5	297.8	297.9	297.7	297.7	297.5	297.2	297	297	297	296.7	296.5	296.3	296.2	296.3	296.5	296.7	296.7	296.7	296.5	296.1	295.6	295.2	294.9	294.8
	-29.25	299.1	297.2	294.7	291.8	287.8	283.3	284.9	288.9	290.8	293.9	295.5	296.6	297.1	297.3	297.2	297	297.1	297.1	297	297.1	296.9	296.6	296.8	297.2	297.4	296.9	296.5	296.5	296.5	296.5	296.6	296.6	296.4	296.3	296.2	296.1	296.1	296.3	296.5	296.6	296.4	296.2	295.8	295.4	294.8	294.5	294.3	294.1
	-30	298	295.8	293.3	290.1	286.5	285.2	287	289.6	293	295	296.1	296.3	296.8	297.1	296.9	296.7	296.8	296.9	297	296.9	296.6	296.6	296.6	296.7	296.4	295.8	295.7	295.6	295.6	295.9	296.2	296.2	296.1	296.1	296.1	296.1	296.1	296	296	296.1	296	295.7	295.5	295.1	294.5	294.1	293.8	293.5
	-30.75	295.1	292.7	290.6	288.6	287	288.1	290.2	291.9	294.4	295.8	295.9	296.1	296.6	296.8	296.6	296.5	296.7	296.9	296.8	296.4	296.2	296.5	296.5	296.1	295.8	295.3	295.2	295.1	295	295.2	295.6	295.9	295.8	295.9	296.1	295.9	295.6	295.5	295.4	295.3	295.2	295.2	295.1	294.8	294.3	293.9	293.5	293.2
	-31.5	290.9	290.3	288.8	288.2	288.5	290.2	292.6	294.4	295.4	295.7	295.8	296	296.3	296.4	296.3	296.3	296.5	296.7	296.5	296	295.9	296.3	296.2	295.7	295.3	294.9	294.7	294.6	294.7	294.8	295.2	295.5	295.6	295.7	295.5	295.1	294.8	294.8	294.6	294.4	294.4	294.5	294.5	294.3	294	293.7	293.4	292.9
	-32.25	289.4	290	289.5	289.6	290.7	292	295.3	295.6	295.6	295.5	295.6	295.7	295.9	296	296	296.1	296.1	296.2	296	295.7	295.7	295.8	295.6	295.1	294.7	294.3	294	294	294.1	294.5	294.9	295	295.1	295	294.6	294.3	294.1	294	293.9	293.7	293.7	293.8	293.8	293.7	293.6	293.4	292.9	292.6
	-33	290.7	291.1	291.3	291.8	292.5	295.3	295.6	295.5	295.4	295.3	295.3	295.3	295.4	295.5	295.6	295.6	295.6	295.6	295.4	295.3	295.2	295.1	294.8	294.4	294	293.6	293.4	293.3	293.5	294	294.3	294.3	294.3	294.3	294.1	293.9	293.7	293.4	293.3	293.3	293.2	293.2	293.2	293.2	293.2	292.9	292.4	292
	-33.75	291.3	292	292.5	295	295.4	295.4	295.2	295.1	295.1	295.1	295	294.9	294.9	295.1	295.1	295.2	295.2	295.1	294.9	294.8	294.6	294.4	294.1	293.7	293.4	293.1	292.9	292.8	293	293.3	293.5	293.6	293.7	293.8	293.9	293.8	293.3	293	293	292.9	292.9	292.8	292.8	292.9	292.8	292.3	291.9	291.5
	-34.5	294.6	295	295.3	295.4	295.2	294.9	294.7	294.6	294.7	294.8	294.8	294.6	294.5	294.7	294.9	295	294.9	294.7	294.4	294.3	294.1	293.9	293.6	293.2	292.9	292.6	292.4	292.3	292.4	292.6	292.8	292.8	293	293.2	293.3	293.3	293	292.7	292.7	292.7	292.7	292.6	292.6	292.6	292.4	291.9	291.4	291.1
	-35.25	295.8	295.8	295.6	295.4	295.1	294.8	294.6	294.5	294.5	294.6	294.5	294.3	294.3	294.2	294.4	294.5	294.4	294.2	294	293.8	293.7	293.5	293.2	292.8	292.4	292.1	292	292	292	292.1	292.1	292.2	292.4	292.5	292.6	292.6	292.5	292.4	292.3	292.4	292.6	292.6	292.5	292.3	292	291.6	291.2	291
	-36	295.6	295.4	295.2	295.3	295.2	295	294.7	294.5	294.4	294.3	294.1	294.1	293.9	293.8	293.8	293.8	293.7	293.7	293.7	293.5	293.2	293	292.8	292.4	291.9	291.6	291.5	291.6	291.7	291.7	291.7	291.8	291.9	292	292.1	292.2	292.2	292	292	292.1	292.3	292.4	292.3	292	291.7	291.4	291.1	290.9
	-36.75	294.6	294.5	294.5	294.6	294.8	294.7	294.5	294.3	294.2	294.1	293.9	293.8	293.6	293.5	293.5	293.6	293.4	293.3	293.4	293.1	292.7	292.4	292.3	291.9	291.6	291.3	291.2	291.3	291.4	291.4	291.5	291.5	291.5	291.5	291.6	291.8	291.9	291.7	291.7	291.9	292	292.1	292	291.7	291.5	291.3	291.1	290.8
	-37.5	292.6	292.8	293.1	293.6	294.1	294.3	294.1	293.8	293.6	293.5	293.4	293.2	293.1	293.1	293.3	293.5	293.4	293.1	292.9	292.6	292.4	292.2	291.9	291.6	291.3	291.1	290.9	290.9	291.1	291.1	291.2	291.4	291.4	291.3	291.3	291.5	291.6	291.5	291.4	291.4	291.6	291.7	291.6	291.5	291.4	291.2	291	290.7
	-38.25	290.9	291.3	291.7	292.4	293.1	293.4	293.3	292.9	292.8	292.8	292.6	292.4	292.3	292.3	292.6	293	293.1	293	292.5	291.9	292.1	292.1	291.8	291.6	291.4	291.2	291	291	291	290.8	290.9	291.2	291.3	291.1	291.2	291.3	291.4	291.3	291.2	291.2	291.1	291.1	291.1	291.1	291	290.8	290.6	290.3
	-39	290.4	290.4	290.7	291	291.4	291.7	291.7	291.6	291.9	292	291.8	291.7	291.5	291.4	291.6	291.9	292.2	292.2	291.7	291.3	291.6	291.8	291.8	291.6	291.4	291.2	291.2	291.2	291.1	290.7	290.7	291.1	291.3	291.2	291.1	291	291	291.1	291.1	291.1	291	290.9	290.9	290.8	290.6	290.4	290.2	289.9
	-39.75	290.2	290.2	290.1	290	289.8	289.8	290	290.2	290.5	290.5	290.5	290.4	290.4	290.3	290.5	290.8	291	290.9	290.4	290.2	290.4	290.7	290.9	290.9	290.9	290.8	290.9	291.2	291.1	290.7	290.5	290.7	291.1	291.2	291.1	291	291	291	291	290.9	290.8	290.7	290.6	290.5	290.3	290	289.7	289.5
	-40.5	289.9	289.8	289.6	289.1	288.6	288.5	288.6	288.8	288.9	288.8	288.8	288.9	289	289.1	289.2	289.3	289.2	289	288.8	288.8	288.8	288.9	288.9	289.1	289.4	289.7	290.1	290.7	290.9	290.6	290.2	290.2	290.5	290.5	290.4	290.5	290.6	290.4	290.1	290.1	290.1	290.2	290.3	290.3	290.1	289.8	289.4	289.2
	-41.25	289.5	289.4	289	288.5	288	287.7	287.5	287.6	287.5	287.4	287.2	287.1	287.2	287.3	287.2	287.1	287	287	287.1	286.9	286.6	286.4	286.5	286.9	287.6	288.4	288.9	289.2	289.7	290	289.7	289.2	289	288.4	288.3	288.9	289.4	289.1	288.7	288.8	288.7	289.2	289.8	290	289.9	289.6	289.1	288.7
	-42	288.4	288.3	288.2	287.9	287.6	287.2	286.8	286.6	286.5	286.3	285.9	285.5	285.2	285	284.7	284.5	284.4	284.6	284.8	284.7	284.4	284.1	284.2	284.7	285.5	286.3	286.6	286	286.3	287.2	287.5	287.6	287.7	287	286.9	287.7	287.9	287.8	287.8	288.4	288.2	288.2	288.7	289.3	289.5	289.1	288.3	287.8
	-42.75	287.3	287.1	287.1	287	287.1	286.8	286.2	285.7	285.6	285.6	285.1	284.4	283.7	283	282.4	281.9	281.8	282	282.2	282.5	282.5	282.5	282.6	282.9	283.4	283.6	283.6	283.1	283.3	283.9	284.6	285.1	285.6	285.5	285.8	286.3	286.4	286.5	286.8	287.7	287.8	287.5	287.6	288.2	288.7	288.4	287.5	286.8
	-43.5	286.7	286.6	286.5	286.2	286	285.6	285.1	284.8	285	285.1	284.6	283.8	282.8	281.9	281	280.3	280	280	280.2	280.5	280.8	281	281.3	281.7	281.9	281.9	281.8	281.7	281.8	282.1	282.6	283.1	283.6	284.1	284.6	285	285.2	285.4	285.8	286.2	286.4	286.5	287	287.8	288.3	288.1	287.3	286.3
	-44.25	286	285.9	285.6	285.2	284.7	284.3	284.1	284.2	284.5	284.5	284.1	283.4	282.6	281.6	280.7	279.8	279.3	279.1	279.1	279.2	279.4	279.6	279.9	280.3	280.5	280.6	280.7	280.9	281.1	281.3	281.6	281.9	282.3	282.7	283.3	283.8	284.3	284.6	284.8	285	285	285.3	286.2	287.5	288.1	287.9	287	285.8
	-45	285.2	284.9	284.6	284.4	284	283.8	283.7	283.9	283.8	283.5	283.1	282.7	282.4	281.8	281	280.3	279.7	279.3	279	278.8	278.6	278.5	278.6	278.8	279.1	279.3	279.6	280	280.5	280.9	281.2	281.4	281.5	281.8	282.1	282.6	283.1	283.6	284	284.2	284.3	284.5	284.9	286.2	287	287	286.2	285
	-45.75	284.3	284	283.9	283.9	283.8	283.4	283.4	283.5	283.4	282.9	282.4	282.2	282.1	281.9	281.4	280.9	280.4	279.9	279.5	279.1	278.7	278.3	278	278	278	278.2	278.5	278.9	279.5	280	280.5	280.8	281.1	281.3	281.5	281.8	282.1	282.5	282.8	283.2	283.6	283.9	284	284.5	285	285.2	284.9	284.3
	-46.5	283.6	283.4	283.4	283.5	283.4	283.1	282.9	283	283	282.5	282.1	281.9	281.8	281.8	281.5	281.2	280.8	280.4	279.9	279.6	279.2	278.8	278.3	277.9	277.7	277.7	277.8	278	278.3	278.7	279.2	279.6	280.2	280.7	281.1	281.3	281.5	281.7	281.9	282.2	282.7	283	283.2	283.3	283.5	283.6	283.5	283.5
	-47.25	282.7	282.8	282.9	283	283	282.9	282.8	282.8	282.6	282.2	281.8	281.5	281.3	281.2	280.9	280.7	280.5	280.3	279.9	279.7	279.5	279.3	278.9	278.5	278.1	277.8	277.6	277.6	277.7	277.9	278.1	278.5	279	279.6	280.2	280.6	280.9	281	281	281.1	281.3	281.6	281.9	282.2	282.4	282.4	282.4	282.5
	-48	281.5	281.6	281.8	282.1	282.5	282.7	282.9	282.9	282.7	282.3	281.9	281.4	280.8	280.4	280.1	279.9	279.8	279.7	279.5	279.3	279.2	279.2	279	278.7	278.4	278.1	277.9	277.9	277.9	277.9	278	278.1	278.4	278.8	279.2	279.6	279.9	280.1	280.1	280.1	280.2	280.4	280.6	280.9	281.1	281.2	281.3	281.5
	-48.75	280.5	280.6	280.7	281	281.4	281.7	282	282.3	282.4	282.3	281.9	281	280.3	279.9	279.7	279.6	279.4	279.2	279	278.9	278.8	278.7	278.6	278.4	278.2	278.2	278.1	278.2	278.3	278.2	278.2	278.3	278.4	278.4	278.5	278.6	278.9	279.1	279.2	279.2	279.4	279.6	279.7	279.8	280	280.1	280.3	280.6
	-49.5	279.9	280	280	280.1	280.3	280.5	280.6	280.8	281.3	281.5	281.3	280.7	280.1	279.7	279.5	279.3	279	278.7	278.5	278.3	278.3	278.1	277.9	277.7	277.7	277.8	277.9	278	278.1	278.1	278.1	278.1	278.1	278	278	277.9	278	278.2	278.4	278.5	278.7	278.8	279	279	279	279.1	279.3	279.5
	-50.25	279.1	279.2	279.2	279.2	279.4	279.5	279.6	279.8	280.3	280.6	280.5	280	279.6	279.2	278.9	278.6	278.4	278.2	278	277.8	277.6	277.4	277.2	277.1	277.2	277.2	277.3	277.4	277.4	277.4	277.4	277.5	277.5	277.5	277.5	277.6	277.6	277.6	277.7	277.8	277.9	278	278.2	278.2	278.3	278.4	278.5	278.7
	-51	278	278.1	278.2	278.4	278.6	278.8	279.1	279.4	279.8	279.8	279.6	279.4	279.1	278.8	278.5	278.2	277.9	277.6	277.3	277.1	276.9	276.7	276.6	276.5	276.5	276.6	276.6	276.6	276.6	276.6	276.6	276.6	276.6	276.7	276.8	277	277	277.1	277.2	277.2	277.2	277.3	277.4	277.5	277.6	277.7	277.9	278
	-51.75	276.6	276.9	277.2	277.5	277.9	278.2	278.6	278.9	279.1	279.2	279.1	279	278.7	278.3	278	277.7	277.3	277	276.8	276.5	276.3	276.1	276	275.9	275.9	275.8	275.8	275.8	275.9	275.9	275.9	275.9	276	276.1	276.2	276.2	276.4	276.5	276.7	276.7	276.7	276.7	276.7	276.8	277	277.2	277.3	277.4
	-52.5	275	275.4	275.9	276.5	277	277.5	278	278.3	278.4	278.6	278.6	278.5	278.2	277.8	277.3	276.9	276.5	276.3	276.1	276.1	275.9	275.8	275.7	275.6	275.5	275.4	275.3	275.3	275.2	275.2	275.3	275.3	275.4	275.5	275.6	275.7	275.8	275.9	276.1	276.2	276.2	276.3	276.3	276.4	276.5	276.7	276.8	276.9
	-53.25	274	274.2	274.7	275.3	276	276.6	277.1	277.5	277.8	278	278.1	277.9	277.4	276.8	276.3	275.8	275.5	275.4	275.4	275.5	275.7	275.7	275.6	275.5	275.3	275.2	275	274.9	274.8	274.8	274.8	274.9	274.9	275	275	275.1	275.2	275.3	275.5	275.7	275.8	275.9	276	276.1	276.2	276.3	276.4	276.5
	-54	273.6	273.7	274.1	274.5	275.1	275.7	276.2	276.6	276.8	277	277	276.7	276.2	275.7	275.3	275.1	275	275.1	275.2	275.4	275.5	275.6	275.5	275.3	275.2	275	274.8	274.7	274.6	274.6	274.6	274.6	274.6	274.6	274.7	274.7	274.8	274.9	275	275.2	275.4	275.6	275.8	275.9	276	276	276.1	276.2
	-54.75	273.4	273.6	273.8	274.1	274.4	274.7	275.1	275.4	275.6	275.7	275.7	275.5	275.1	274.9	274.8	274.8	274.9	275.1	275.3	275.5	275.5	275.5	275.3	275.1	274.9	274.8	274.7	274.7	274.7	274.6	274.6	274.6	274.5	274.5	274.4	274.4	274.4	274.5	274.6	274.8	275	275.2	275.4	275.6	275.7	275.7	275.7	275.8
	-55.5	272.9	273.2	273.5	273.7	273.8	274	274.3	274.5	274.6	274.7	274.7	274.7	274.7	274.7	274.7	274.7	275	275.2	275.4	275.4	275.3	275.2	274.9	274.8	274.7	274.7	274.7	274.7	274.7	274.7	274.6	274.6	274.6	274.5	274.4	274.3	274.3	274.3	274.3	274.4	274.6	274.8	275.1	275.2	275.3	275.4	275.5	275.5
	-56.25	272.5	272.7	272.9	273.1	273.4	273.6	273.9	274	274.1	274.2	274.4	274.6	274.7	274.8	274.8	274.8	274.9	275	275.1	275	274.9	274.8	274.7	274.6	274.6	274.6	274.6	274.7	274.7	274.7	274.7	274.6	274.6	274.6	274.5	274.3	274.2	274.1	274.1	274.1	274.3	274.5	274.7	274.9	275	275.2	275.2	275.3
	-57	272.3	272.4	272.6	272.7	272.9	273.1	273.3	273.5	273.7	274	274.2	274.4	274.6	274.7	274.7	274.7	274.7	274.7	274.7	274.6	274.6	274.5	274.4	274.4	274.5	274.5	274.6	274.6	274.6	274.6	274.6	274.6	274.5	274.5	274.4	274.3	274.1	274	273.9	273.8	273.9	274.1	274.3	274.4	274.6	274.8	274.9	274.9
	-57.75	272.3	272.4	272.5	272.6	272.7	272.8	272.9	273.1	273.3	273.5	273.7	273.8	274	274.2	274.3	274.3	274.3	274.3	274.3	274.3	274.2	274.2	274.2	274.2	274.3	274.4	274.4	274.4	274.4	274.4	274.3	274.3	274.3	274.2	274.2	274.1	274	273.8	273.7	273.6	273.6	273.7	273.8	274	274.1	274.3	274.4	274.4
	-58.5	272.3	272.4	272.5	272.6	272.7	272.8	272.9	273	273.1	273.2	273.2	273.3	273.5	273.6	273.6	273.7	273.7	273.8	273.8	273.8	273.9	273.9	274	274	274	274.1	274.2	274.3	274.3	274.2	274.1	274.1	274	274	273.9	273.8	273.7	273.6	273.5	273.5	273.5	273.5	273.5	273.7	273.8	273.9	274	274.1
	-59.25	272.5	272.5	272.6	272.7	272.7	272.9	272.9	273	273	273.1	273.1	273.1	273.2	273.2	273.3	273.3	273.4	273.4	273.5	273.5	273.6	273.6	273.6	273.7	273.8	273.9	274	274	274	274	273.9	273.9	273.8	273.7	273.6	273.6	273.5	273.4	273.4	273.4	273.4	273.4	273.4	273.5	273.5	273.6	273.7	273.8
	-60	272.6	272.7	272.7	272.7	272.7	272.8	272.8	272.9	272.9	272.9	273	273.1	273.1	273.2	273.2	273.3	273.3	273.3	273.4	273.4	273.4	273.4	273.5	273.5	273.6	273.6	273.7	273.7	273.7	273.7	273.7	273.6	273.6	273.5	273.5	273.4	273.4	273.4	273.4	273.3	273.3	273.3	273.4	273.4	273.5	273.5	273.5	273.6
	-60.75	272.5	272.5	272.5	272.5	272.5	272.5	272.5	272.5	272.6	272.7	272.8	272.9	273	273.2	273.2	273.3	273.3	273.3	273.3	273.3	273.3	273.3	273.3	273.4	273.4	273.4	273.4	273.5	273.5	273.5	273.5	273.5	273.4	273.4	273.4	273.4	273.4	273.4	273.4	273.4	273.4	273.4	273.4	273.4	273.4	273.4	273.4	273.4
	-61.5	272.3	272.4	272.4	272.4	272.3	272.3	272.3	272.3	272.4	272.5	272.6	272.7	272.9	273	273.1	273.1	273.2	273.2	273.2	273.2	273.2	273.2	273.2	273.2	273.2	273.3	273.3	273.3	273.3	273.3	273.4	273.4	273.3	273.3	273.3	273.3	273.3	273.3	273.3	273.3	273.4	273.4	273.4	273.4	273.4	273.4	273.4	273.3
	-62.25	272.2	272.2	272.2	272.3	272.2	272.2	272.2	272.2	272.2	272.3	272.4	272.6	272.7	272.8	272.9	273	273.1	273.1	273.1	273.2	273.2	273.1	273.1	273.1	273.1	273.1	273.2	273.2	273.2	273.2	273.3	273.3	273.3	273.3	273.3	273.3	273.3	273.3	273.4	273.4	273.4	273.4	273.4	273.4	273.4	273.4	273.3	273.3
	-63	272.2	272.2	272.2	272.3	272.3	272.3	272.2	272.2	272.2	272.3	272.4	272.5	272.6	272.8	272.9	273	273	273.1	273.1	273.2	273.2	273.1	273.1	273.1	273.1	273.1	273.2	273.2	273.2	273.3	273.3	273.3	273.3	273.3	273.3	273.3	273.4	273.4	273.4	273.4	273.4	273.3	273.3	273.3	273.3	273.3	273.3	273.3
	-63.75	272.2	272.2	272.2	272.3	272.3	272.3	272.3	272.3	272.3	272.4	272.5	272.6	272.7	272.8	272.9	273	273	273.1	273.1	273.2	273.1	273.1	273.1	273.1	273.2	273.2	273.2	273.2	273.2	273.2	273.2	273.2	273.2	273.2	273.2	273.2	273.2	273.2	273.2	273.2	273.2	273.1	273.1	273	273	272.9	272.9	272.9
	-64.5	272.2	272.2	272.2	272.3	272.3	272.4	272.4	272.4	272.4	272.5	272.6	272.6	272.7	272.8	272.9	273	273	273.1	273.1	273.1	273.1	273.1	273.1	273.1	273.2	273.2	273.2	273.2	273.2	273.1	273.1	273	273	273	273	273	273	273	273	273	272.9	272.8	272.8	272.7	272.7	272.6	272.5	272.5
	-65.25	272.2	272.2	272.2	272.3	272.3	272.3	272.4	272.4	272.4	272.5	272.5	272.6	272.7	272.8	272.8	272.9	272.9	273	273	273	273	273	273.1	273.1	273.1	273.1	273.1	273.1	273	273	272.9	272.9	272.9	272.9	272.8	272.8	272.6	272.5	272.3	272.2	272.3	272.3	272.5	272.7	272.7	272.8	272.7	272.7
	-66	272.3	272.2	272.3	272.3	272.3	272.3	272.3	272.3	272.4	272.4	272.5	272.6	272.6	272.7	272.8	272.8	272.8	272.9	272.9	272.9	273	273	273	273	273	273	273	273	273	273	273	273	272.9	272.8	272.6	272.3	270	268.6	267.8	267.5	267.9	269.2	271.9	272.4	272.6	272.7	272.8	272.8
	-66.75	272.5	272.4	272.4	272.4	272.4	272.5	272.5	272.6	272.7	272.8	272.8	272.9	272.9	272.9	272.9	272.9	272.9	272.9	272.9	273	273	273.1	273.2	273.2	273.2	273.2	273.2	273.1	273.1	273	273	273	272.7	272.2	270.3	269	267.9	266.1	264.7	264.7	265.3	266.9	268.6	271.3	271.8	272	272.1	272.2
	-67.5	273	273	273	273	273	273	273.1	273.1	273.2	273.3	273.3	273.3	273.4	273.4	273.3	273.3	273.3	273.3	273.3	273.4	273.4	273.4	273.3	273.2	272.9	272.6	272.2	271.8	271.9	270.9	270.7	270.6	269.8	268.5	267	265.3	264.1	262.8	261.6	262	262.7	264	265.5	266.4	266.6	266.8	267.3	267.8
	-68.25	273.4	273.4	273.4	273.4	273.4	273.3	273.4	273.4	273.4	273.4	273.4	273.3	273.4	273.5	273.5	273.6	273.7	273.7	273.7	273.5	273.3	273.1	272.8	272	269.1	267.9	266.8	265.8	266.1	266.4	266.5	266.5	265.9	264.7	263.3	261.6	259.9	259.3	258.6	259.1	259.7	260.3	260.9	261.3	261.5	261.7	262.1	262.6
	-69	273.4	273.4	273.4	273.4	273.4	273.4	273.4	273.4	273.4	273.2	272.9	272.9	272.4	272.4	272.5	273.2	273.5	273.8	273.6	273.1	271.4	269.1	268.5	267	265.1	263.4	262.3	261.1	261	260.8	260.8	261	260.9	260.2	259.5	258.3	257.1	256.3	255.8	255.6	255.8	256.1	256.2	256.2	256.2	256.4	256.7	257.1
	-69.75	273.7	273.7	273.7	273.7	273.6	273.6	273.5	273.5	272.6	272.4	272	271.2	270.6	270.5	270.2	270.4	271	271.7	272.2	271.9	270.1	268.1	266.3	264.2	262	260.3	259.1	257.9	257.4	257	256.8	256.8	256.8	256.3	255.9	255.3	254.4	253.7	253.2	252.7	252.4	252.2	252	252.1	252.3	252.5	252.9	253.3
[truncated: 152 more columns]
