# Supplementary material for: Temperature Field Data Reconstruction Using the Sparse Low-Rank Matrix Completion Method
Source: Hindawi journal article supplement (doi:10.1155/2019/3676182), 2019-11-03
Supplement: f1 [file 3676182.f1.zip › data/Jiangxi Meteorologic Bureau/20170322.txt]

diamond 3 2017Äê03ÔÂ22ÈÕ08Ê±¹ýÈ¥24Ð¡Ê±×î¸ßÎÂ¶È
17 03 22 08 -1
0
1 50 0
1 89
  58606 115.92  28.60      0   14.6
  58693 115.83  28.70      0   14.5
  58602 115.55  28.85      0   14.5
  58614 116.28  28.40      0   13.8
  58607 115.95  28.55      0   14.1
  58502 116.02  29.67      0   11.6
  58503 115.67  29.71      0   12.8
  58506 115.98  29.58      0    7.7
  58510 116.20  29.68      0   12.7
  58512 116.55  29.90      0   12.1
  58514 116.05  29.45      0   13.9
  58517 116.18  29.25      0   15.6
  58508 115.77  29.33      0   15.2
  58509 115.82  29.05      0   14.3
  58507 115.12  29.25      0   13.2
  57598 114.58  29.03      0   13.2
  57793 114.38  27.80      0   12.0
  58608 115.55  28.07      0   14.5
  58609 115.82  28.22      0   15.0
  58605 115.38  28.42      0   14.3
  58601 115.38  28.70      0   14.0
  58600 115.37  28.87      0   15.0
  57696 114.78  28.40      0   14.0
  57699 114.97  28.23      0   13.3
  57698 114.43  28.10      0   11.4
  57694 114.38  28.53      0   12.0
  57796 114.88  27.83      0   12.4
  57792 114.68  27.82      0   12.7
  57786 113.85  27.63      0   11.2
  57789 113.95  27.13      0   11.9
  58637 117.98  28.45      0   15.1
  58623 117.92  28.47      0   15.2
  58635 118.19  28.45      0   15.4
  58634 118.25  28.68      0   14.6
  58624 117.43  28.40      0   14.6
  58625 117.60  28.42      0   15.0
  58629 117.70  28.28      0   14.6
  58529 117.85  29.27      0   15.4
  58622 117.58  28.95      0   14.5
  58519 116.68  29.00      0   15.1
  58612 116.68  28.70      0   15.2
  58615 117.08  28.68      0   15.2
  58627 117.05  28.32      0   14.2
  58626 117.23  28.30      0   14.8
  58616 116.82  28.20      0   14.7
  58527 117.20  29.30      0   16.7
  58620 117.10  29.02      0   16.2
  58619 116.27  27.90      0   13.1
  58618 116.60  28.27      0   13.8
  58710 116.05  27.77      0   12.8
  58712 116.78  27.92      0   14.4
  58713 117.07  27.72      0   13.8
  58714 116.23  27.55      0   12.1
  58715 116.65  27.58      0   12.7
  58718 116.53  27.22      0   13.3
  58719 116.93  27.30      0   13.0
  58706 115.83  27.43      0   12.2
  57799 114.92  27.05      0   11.9
  57797   9999   9999   9999   9999
  58707 115.13  27.22      0   12.7
  57798 114.60  27.40      0   12.2
  58704 115.35  27.58      0   12.5
  58701 115.40  27.77      0   13.8
  58705 115.42  27.33      0   13.1
  57899 114.92  26.80      0   12.6
  57891 114.25  26.93      0   11.6
  57894 114.17  26.58      0    9.4
  57883 114.28  26.75      0   12.0
  57895 114.78  26.47      0   12.6
  57896 114.50  26.33      0   12.3
  57993 115.00  25.87      0   15.5
  58900   9999   9999   9999   9999
  57990 114.32  25.70      0   15.8
  57991 114.55  25.80      0   17.1
  57992 114.75  25.67      0   16.9
  57994 114.35  25.40      0   17.1
  57995 114.87  25.35      0   15.6
  58804 115.35  26.28      0   14.3
  58806 116.02  26.48      0   13.5
  58813 116.30  26.83      0   13.4
  58814 116.35  26.35      0   13.4
  58903 116.03  25.90      0   16.8
  58905 115.42  25.97      0   16.1
  58906 115.80  25.60      0   18.3
  58907 115.40  25.15      0   18.2
  59091 114.52  24.75      0   16.5
  59092 114.80  24.87      0   16.0
  59093 115.03  24.78      0   17.5
  59102 115.65  24.95      0   20.4
