# Supplementary material for: Temperature Field Data Reconstruction Using the Sparse Low-Rank Matrix Completion Method
Source: Hindawi journal article supplement (doi:10.1155/2019/3676182), 2019-11-03
Supplement: f1 [file 3676182.f1.zip › data/Jiangxi Meteorologic Bureau/江西国家站.xlsx]

## Sheet: data_20180927120147
所属地区	所属县/市	站名	站号	站点类型	经度	纬度	海拔高度
赣州市	寻乌县	寻乌	59102	国家站	115.65	24.95	303.9
赣州市	安远县	安远	58907	国家站	115.4	25.15	305
上饶市	德兴市	德兴	58622	国家站	117.583	28.95	88.5
景德镇市	乐平市	乐平	58620	国家站	117.133	28.9667	34.5
上饶市	玉山县	玉山	58634	国家站	118.25	28.6833	116.3
上饶市	婺源县	婺源	58529	国家站	117.85	29.2667	80.9
赣州市	会昌县	会昌	58906	国家站	115.8	25.6	167.4
景德镇市	景德镇市	景德镇	58527	国家站	117.2	29.3	61.5
赣州市	于都县	于都	58905	国家站	115.417	25.9667	133.2
上饶市	鄱阳县	鄱阳	58519	国家站	116.683	29	40.1
上饶市	弋阳县	弋阳	58624	国家站	117.433	28.4	70
赣州市	南康市	南康	57992	国家站	114.75	25.6667	127
上饶市	横峰县	横峰	58625	国家站	117.6	28.4167	79
上饶市	万年县	万年	58615	国家站	117.083	28.6833	56
上饶市	余干县	余干	58612	国家站	116.683	28.7	21.1
上饶市	上饶县	上饶县	58623	国家站	117.917	28.4667	90.6
赣州市	瑞金市	瑞金	58903	国家站	116.033	25.9	208
鹰潭市	贵溪市	贵溪	58626	国家站	117.217	28.3	51.2
上饶市	铅山县	铅山	58629	国家站	117.7	28.3167	55.1
上饶市	广丰县	广丰	58635	国家站	118.2	28.4333	95.3
上饶市	上饶市	上饶	58637	国家站	117.983	28.45	118.2
赣州市	全南县	全南	59091	国家站	114.533	24.75	252
赣州市	定南县	定南	59093	国家站	115.033	24.7833	253
景德镇市	浮梁县	浮梁	58524	国家站	117.215	29.3617	87.3
抚州市	黎川县	黎川	58719	国家站	116.933	27.3	131.1
抚州市	南丰县	南丰	58718	国家站	116.533	27.2167	111.5
鹰潭市	鹰潭市	鹰潭	58627	国家站	117.033	28.25	55.8
赣州市	石城县	石城	58814	国家站	116.35	26.35	247.4
鹰潭市	余江县	余江	58616	国家站	116.817	28.2	40.9
抚州市	崇仁县	崇仁	58710	国家站	116.05	27.7667	78.6
赣州市	上犹县	上犹	57991	国家站	114.55	25.8	140.2
抚州市	资溪县	资溪	58713	国家站	117.067	27.7167	225.1
赣州市	宁都县	宁都	58806	国家站	116.017	26.4833	209.1
宜春市	靖安县	靖安	58600	国家站	115.367	28.8667	78.9
南昌市	安义县	安义	58602	国家站	115.55	28.85	38.8
赣州市	大余县	大余	57994	国家站	114.35	25.4	215.6
抚州市	广昌县	广昌	58813	国家站	116.333	26.85	143.8
南昌市	进贤县	进贤	58614	国家站	116.267	28.3833	34.2
抚州市	金溪县	金溪	58712	国家站	116.783	27.9167	130.2
赣州市	兴国县	兴国	58804	国家站	115.35	26.35	151
赣州市	信丰县	信丰	57995	国家站	114.933	25.4	164.2
宜春市	丰城市	丰城	58609	国家站	115.817	28.2167	27
南昌市	新建县	新建	58693	国家站	115.833	28.7	40
赣州市	龙南县	龙南	59092	国家站	114.817	24.9167	206.3
南昌市	南昌市	南昌	58606	国家站	115.917	28.6	46.9
南昌市	南昌县	南昌县	58607	国家站	115.95	28.55	31.9
宜春市	高安市	高安	58605	国家站	115.383	28.4167	46.8
抚州市	南城县	南城	58715	国家站	116.65	27.5833	80.8
抚州市	东乡县	东乡	58618	国家站	116.6	28.2333	50.6
九江市	都昌县	都昌	58517	国家站	116.183	29.25	77.5
吉安市	新干县	新干	58701	国家站	115.4	27.7667	46.5
宜春市	奉新县	奉新	58601	国家站	115.383	28.7	53.7
抚州市	抚州市	临川	58619	国家站	116.367	28	49.3
吉安市	永丰县	永丰	58705	国家站	115.417	27.3333	85.7
吉安市	吉水县	吉水	58707	国家站	115.133	27.2167	66.2
吉安市	泰和县	泰和	57899	国家站	114.917	26.8	71.4
抚州市	宜黄县	宜黄	58714	国家站	116.233	27.55	120.4
赣州市	崇义县	崇义	57990	国家站	114.3	25.7	246.9
赣州市	赣州市	赣州	57993	国家站	115	25.8667	137.5
九江市	永修县	永修	58509	国家站	115.817	29.05	36.6
吉安市	吉安县	吉安县	57799	国家站	114.917	27.05	71.2
吉安市	万安县	万安	57895	国家站	114.783	26.4667	101.6
抚州市	乐安县	乐安	58706	国家站	115.833	27.4333	181.8
吉安市	安福县	安福	57798	国家站	114.6	27.4	85.9
宜春市	樟树市	樟树	58608	国家站	115.55	28.0667	30.4
九江市	湖口县	湖口	58510	国家站	116.2	29.6833	35.2
宜春市	上高县	上高	57699	国家站	114.917	28.2333	66.6
九江市	庐山市	星子	58514	国家站	116.05	29.45	37.1
吉安市	峡江县	峡江	58704	国家站	115.35	27.6167	52.8
吉安市	遂川县	遂川	57896	国家站	114.5	26.3333	126.1
九江市	瑞昌市	瑞昌	58503	国家站	115.667	29.7	41.2
九江市	共青城市	共青城	58604	国家站	115.833	29.2167	12.8
九江市	九江市辖区	九江	58502	国家站	116.019	29.6739	74.8
九江市	九江县	九江县	58505	国家站	115.88	29.6	63.1
宜春市	宜丰县	宜丰	57696	国家站	114.783	28.4	91.7
九江市	武宁县	武宁	58507	国家站	115.117	29.25	116
九江市	彭泽县	彭泽	58512	国家站	116.55	29.9	71.3
吉安市	永新县	永新	57891	国家站	114.25	26.9333	153
九江市	德安县	德安	58508	国家站	115.767	29.3333	41.3
新余市	新余市	新余	57796	国家站	114.883	27.8333	189.3
萍乡市	莲花县	莲花	57789	国家站	113.95	27.1333	194.5
吉安市	井冈山市	夏坪站	57883	国家站	114.283	26.75	253
新余市	分宜县	分宜	57792	国家站	114.683	27.8167	93.7
宜春市	万载县	万载	57698	国家站	114.45	28.1167	98.4
九江市	修水县	修水	57598	国家站	114.583	29.0333	146.8
宜春市	宜春市	宜春	57793	国家站	114.383	27.8	131.3
萍乡市	萍乡市	萍乡	57786	国家站	113.85	27.6333	117.5
萍乡市	上栗县	上栗	57783	国家站	113.8	27.88	119.5
宜春市	铜鼓县	铜鼓	57694	国家站	114.383	28.5333	259.8
萍乡市	芦溪县	芦溪	57794	国家站	114	27.63	177.2
吉安市	井冈山市	井冈山	57894	国家站	114.167	26.5833	843
九江市	庐山市-风景区	庐山	58506	国家站	115.983	29.5833	1164.5
